# 1 Steppe Ancestry in western Eurasia and the spread of the 2 Germanic Languages

3  
4  
5 Hugh McColl<sup>1</sup>, Guus Kroonen<sup>2,3</sup>, J. Víctor Moreno-Mayar<sup>1</sup>, Frederik Valeur Seersholm<sup>1</sup>,  
6 Gabriele Scorrano<sup>1</sup>, Thomaz Pinotti<sup>1,4</sup>, Tharsika Vimala<sup>1</sup>, Søren M. Sindbæk<sup>5</sup>, Per Ethelberg<sup>6</sup>,  
7 Ralph Fyfe<sup>7</sup>, Marie-José Gaillard<sup>8</sup>, Hanne M. Ellegård Larsen<sup>9</sup>, Morten Fischer Mortensen<sup>10</sup>,  
8 Fabrice Demeter<sup>1,11</sup>, Marie Louise S. Jørkov<sup>12</sup>, Sophie Bergerbrant<sup>13</sup>, Peter de Barros  
9 Damgaard<sup>1</sup>, Morten E. Allentoft<sup>14,1</sup>, Lasse Vinner<sup>1</sup>, Charleen Gaunitz<sup>1</sup>, Abigail Ramsøe<sup>1</sup>, Isin  
10 Altinkaya<sup>1</sup>, Rasmus Amund Henriksen<sup>1</sup>, Evan K. Irving-Pease<sup>1,15</sup>, Serena Sabatini<sup>16</sup>, Anders  
11 Fischer<sup>17,16</sup>, William Barrie<sup>18</sup>, Andrés Ingason<sup>19,1</sup>, Anders Rosengren<sup>19,1</sup>, Andrew Vaughn<sup>20</sup>,  
12 Jialu Cao<sup>1</sup>, Jacqueline Staring<sup>1</sup>, Jesper Stenderup<sup>1</sup>, Fulya Eylem Yediay<sup>21,16</sup>, Torbjörn  
13 Ahlström<sup>22</sup>, Sofie Laurine Albris<sup>23</sup>, Biyaslan Atabiev<sup>24</sup>, Pernille Bangsgaard<sup>1</sup>, Maria  
14 Giovanna Belcastro<sup>25</sup>, Nick Card<sup>26</sup>, Philippe Charlier<sup>27,28</sup>, Elizaveta Chernykh<sup>29</sup>, Torben Trier  
15 Christiansen<sup>30</sup>, Alfredo Coppa<sup>31</sup>, Maura De Coster<sup>32</sup>, Sean Dexter Denham<sup>33</sup>, Sophie  
16 Desenne<sup>34,35</sup>, Jane Downes<sup>26</sup>, Karin Margarita Frei<sup>9</sup>, Olivér Gábor<sup>36</sup>, Johan Zakarias  
17 Gårdsvoll<sup>23</sup>, Zannette Tsigaridas Glørstad<sup>37</sup>, Jesper Hansen<sup>38</sup>, Stijn Heeren<sup>39</sup>, Merete  
18 Henriksen<sup>40</sup>, Volker Heyd<sup>41</sup>, Mette Høj<sup>42</sup>, Mads Kähler Holst<sup>43</sup>, Rimantas Jankauskas<sup>44</sup>,  
19 Henrik Janson<sup>45</sup>, Mads Densø Jessen<sup>23</sup>, Jens Winther Johannsen<sup>46</sup>, Torkel Johansen<sup>47</sup>, Ole  
20 Thirup Kastholm<sup>46</sup>, Anton Kern<sup>48</sup>, Ruslan Khaskhanov<sup>49</sup>, Katrine Kjær<sup>50</sup>, Vladimir  
21 Kolosov<sup>51</sup>, Lisette M. Kootker<sup>32</sup>, Anne Christine Larsen<sup>52</sup>, Thierry Lejars<sup>53</sup>, Mette  
22 Løvschal<sup>54,43</sup>, Niels Lynnerup<sup>55</sup>, Yvonne Magnusson<sup>56</sup>, Kristiina Mannermaa<sup>57</sup>, Vyacheslav  
23 Masyakin<sup>58</sup>, Anne Lene Melheim<sup>37</sup>, Inga Merkyte<sup>59</sup>, Vyacheslav Moiseyev<sup>60</sup>, Stig Bergmann  
24 Møller<sup>61</sup>, Erika Molnár<sup>62</sup>, Nadja Mortensen<sup>46</sup>, Eileen Murphy<sup>63</sup>, Bjarne Henning Nielsen<sup>64</sup>,  
25 Doris Pany-Kucera<sup>65</sup>, Bettina Schulz Paulsson<sup>45</sup>, Marcia S Ponce de León<sup>66</sup>, Håkon  
26 Reiersen<sup>33</sup>, Walter Reinhard<sup>67</sup>, Antti Sajantila<sup>68,69</sup>, Birgitte Skar<sup>70</sup>, Vladimir Slavchev<sup>71</sup>,  
27 Václav Smrčka<sup>72</sup>, Lasse Sørensen<sup>73</sup>, Georg Tiefengraber<sup>65</sup>, Otto Christian Uldum<sup>74</sup>, Jorge  
28 Vega<sup>75</sup>, Daniele Vitali<sup>76</sup>, Alexey Voloshinov<sup>77</sup>, Sidsel Wåhlin<sup>64,78</sup>, Holger Wendling<sup>79,80</sup>,  
29 Anna Wessman<sup>81</sup>, Helene Wilhelmson<sup>82,83</sup>, Karin Wiltschke<sup>65</sup>, João Zilhao<sup>84</sup>, Christoph PE  
30 Zollikofer<sup>66</sup>, Thorfinn Sand Korneliusen<sup>1</sup>, Bruno Chaume<sup>85</sup>, Jean-Paul Demoule<sup>86,87</sup>,  
31 Thomas Werge<sup>19,88</sup>, Line Olsen<sup>1</sup>, Rasmus Nielsen<sup>89,1</sup>, Lotte Hedeager<sup>1</sup>, Kristian  
32 Kristiansen<sup>1,16</sup>, Martin Sikora<sup>1</sup>, Eske Willerslev<sup>1,90</sup> \*

33

## 34 Affiliations

35 <sup>1</sup>Lundbeck Foundation GeoGenetics Center, Globe Institute, University of Copenhagen,  
36 Copenhagen, Denmark., <sup>2</sup>Leiden University Centre for Linguistics, Leiden University,  
37 Leiden, The Netherlands, <sup>3</sup>Department of Nordic Studies and Linguistics, University of  
38 Copenhagen, Copenhagen, Denmark, <sup>4</sup>Laboratório de Biodiversidade e Evolução Molecular  
39 (LBEM), Universidade Federal de Minas Gerais, Belo Horizonte, Brazil, <sup>5</sup>Centre for Urban  
40 Network Evolutions (UrbNet), School of Culture and Society, Aarhus University, Aarhus,  
41 Denmark, <sup>6</sup>Museum Sønderjylland, Arkæologi, <sup>7</sup>School of Geography, Earth and

42 Environmental Sciences, University of Plymouth UK, <sup>8</sup>Department of Biology and  
43 Environmental Sciences, Linnaeus University, Kalmar, Sweden, <sup>9</sup>National Museum of  
44 Denmark, <sup>10</sup>National Museum of Denmark. Environmental Archaeology and Materials  
45 Science, <sup>11</sup>Eco-anthropologie (EA), Dpt ABBA, Muséum national d'Histoire naturelle,  
46 CNRS, Université Paris Cité, Musée de l'Homme 17 place du Trocadéro, 75016 Paris,  
47 France, <sup>12</sup>Laboratory of Biological Anthropology, Globe Institute, University of Copenhagen,  
48 Denmark, <sup>13</sup>Department of Archaeology and Ancient History, Campus Gotland, Uppsala  
49 University, <sup>14</sup>Trace and Environmental DNA (TrEnD) Laboratory, School of Molecular and  
50 Life Sciences, Curtin University, Perth, Australia, <sup>15</sup>Section for Molecular Ecology and  
51 Evolution, Globe Institute, University of Copenhagen, Copenhagen, Denmark, <sup>16</sup>Department  
52 of Historical Studies, University of Gothenburg, Sweden, <sup>17</sup>Sealand Archaeology,  
53 Kalundborg, Denmark, <sup>18</sup>Department of Genetics, University of Cambridge, Cambridge, UK,  
54 <sup>19</sup>Institute of Biological Psychiatry, Mental Health Services, Copenhagen University  
55 Hospital, Roskilde, Denmark., <sup>20</sup>Center for Computational Biology, University of California  
56 Berkeley, Berkeley, California, United States of America, <sup>21</sup>Lundbeck Foundation  
57 GeoGenetics Center, Globe Institute, University of Copenhagen, Copenhagen, Denmark,  
58 <sup>22</sup>Department of Archaeology and Ancient History, Lund University, <sup>23</sup>National Museum of  
59 Denmark, Prehistory, Middle Ages and Renaissance, <sup>24</sup>Institute for Caucasus Archaeology,  
60 Russia, <sup>25</sup>Department of Biological, Geological and Environmental Sciences - BiGeA,  
61 University of Bologna, Via Selmi 3 40126 Bologna, Italy, <sup>26</sup>Archaeology Institute, University  
62 of Highlands and Islands, UK, <sup>27</sup>Laboratory Anthropology, Archaeology, Biology (LAAB),  
63 UFR of Health Sciences (UVSQ / Paris Saclay University), 2 avenue de la source de la  
64 Bièvre, 78180 Montigny-Le-Bretonneux, France, <sup>28</sup>Department of Epidemiology and Public  
65 Health, University Hospital Raymond Poincaré (APHP), Garches, France, <sup>29</sup>Udmurt State  
66 University, <sup>30</sup>The Historical Museum of Northern Jutland, <sup>31</sup>Department of Environmental  
67 Biology, Sapienza University of Rome, <sup>32</sup>Geology & Geochemistry cluster, Department of  
68 Earth Sciences, Vrije Universiteit Amsterdam, the Netherlands, <sup>33</sup>Museum of Archaeology,  
69 University of Stavanger, <sup>34</sup>Institut national de recherches archéologiques préventives, <sup>35</sup>UMR  
70 8215, CNRS, <sup>36</sup>Janus Pannonius Muzeum, Pécs, Hungary, <sup>37</sup>Museum of Cultural History,  
71 University of Oslo, <sup>38</sup>Svendborg Museum, Denmark, <sup>39</sup>Vrije Universiteit Amsterdam, the  
72 Netherlands, <sup>40</sup>Institute of archaeology and cultural history, NTNU University museum,  
73 <sup>41</sup>Department of Cultures / Archaeology, University of Helsinki, Finland, <sup>42</sup>The Museum  
74 Organisation ROMU, Collections, <sup>43</sup>Moesgaard Museum, <sup>44</sup>Vilnius University, Lithuania,  
75 <sup>45</sup>Department of Historical Studies, University of Gothenburg, Gothenburg, Sweden, <sup>46</sup>The  
76 Museum Organisation ROMU, Archaeology, <sup>47</sup>NTNU University Museum, Department of  
77 Archaeology and Cultural History, <sup>48</sup>Natural History Museum, Vienna, <sup>49</sup>Complex Research  
78 Institute of the Russian Academy of Sciences, Grozny, Russia, <sup>50</sup>ROMU, <sup>51</sup>The State  
79 Hermitage Museum, <sup>52</sup>National Museum of Denmark, Trelleborg, <sup>53</sup>CNRS, Umr 8546, ENS,  
80 PSL, Paris, <sup>54</sup>Department of Archaeology and Heritage Studies, Aarhus University, Aarhus,  
81 Denmark, <sup>55</sup>Department of Forensic Medicine, University of Copenhagen, Denmark,  
82 <sup>56</sup>Malmö museum, 205 80 Malmö, Sweden/Regionmuseet Skåne, Box 134, 291 22  
83 Kristianstad, <sup>57</sup>Department of Cultures, Archaeology, University of Helsinki, Finland,  
84 <sup>58</sup>National Academy of Sciences, Ukraine, <sup>59</sup>Saxo-Institutet, Copenhagen, <sup>60</sup>Peter the Great  
85 Museum of Anthropology and Ethnography (Kunstkamera), Russian Academy of Sciences,

86 Universitetskaya Nab. 3, St. Petersburg, Russia, <sup>61</sup>Nordjyske Museer, Aalborg, Denmark,  
87 <sup>62</sup>Department of Biological Anthropology, University of Szeged, Hungary, <sup>63</sup>Archaeology  
88 and Palaeoecology, School of Natural and Built Environment, Queen's University Belfast,  
89 Northern Ireland, <sup>64</sup>Vesthimmerlands Museum, <sup>65</sup>Natural History Museum Vienna, Austria,  
90 <sup>66</sup>Department of Informatics, University of Zurich, <sup>67</sup>Staatliches Konservatoramt,  
91 Saarbruecken, Germany, <sup>68</sup>University of Helsinki, <sup>69</sup>Finnish Institute of Health and Welfare,  
92 <sup>70</sup>Institute of archaeology and cultural history, NTNU University Museum, Norway.,  
93 <sup>71</sup>Museum of Archaeology, Varna, Bulgaria, <sup>72</sup>Institute for History of Medicine, First Faculty  
94 of Medicine, Charles University, Prague, Czech Republic, <sup>73</sup>The National Museum of  
95 Denmark, Prehistory, Middle Ages and Renaissance, <sup>74</sup>The Viking Ship Museum, Roskilde.,  
96 <sup>75</sup>Argea Consultores SL, Madrid, Spain, <sup>76</sup>Département de Histoire des Arts et Archéologie,  
97 University of Burgundy, France, <sup>77</sup>Institute of Archeology, Moscow, Russia, <sup>78</sup>Vendsyssel  
98 Historiske Museum, <sup>79</sup>Salzburg Museum, Austria, <sup>80</sup>Archäologische Staatssammlung,  
99 <sup>81</sup>University of Bergen, Department of Cultural History, Norway, <sup>82</sup>Lund University Sweden,  
100 <sup>83</sup>Sydsvensk arkeologi, Malmö, Sweden, <sup>84</sup>University of Lisbon - UNIARQ (Centro de  
101 Arqueologia da Universidade de Lisboa), Faculdade de Letras, Alameda da Universidade,  
102 1600-214 Lisboa, Portugal, <sup>85</sup>UMR6298, ARTEHIS, CNRS (Centre National de la Recherche  
103 Scientifique), Dijon, France, <sup>86</sup>University of Paris I - Panthéon-Sorbonne, <sup>87</sup>UMR 8215  
104 CNRS, <sup>88</sup>Lundbeck Foundation GeoGenetics Center, Globe Institute, Faculty of Health  
105 Sciences, University of Copenhagen, Copenhagen, Denmark., <sup>89</sup>Departments of Integrative  
106 Biology and Statistics, UC Berkeley, <sup>90</sup>GeoGenetics Group, Department of Zoology,  
107 University of Cambridge, Cambridge, UK

108

109 \* Corresponding author; email: ewillerslev@sund.ku.dk

110

## 111 **Summary**

112 Germanic-speaking populations historically form an integral component of the North and  
113 Northwest European cultural configuration. According to linguistic consensus, the common  
114 ancestor of the Germanic languages, which include German, English, Frisian, Dutch as well  
115 as the Nordic languages, was spoken in Northern Europe during the Pre-Roman Iron Age.  
116 However, important questions remain concerning the earlier Bronze Age distribution of this  
117 Indo-European language branch in Scandinavia as well as the driving factors behind its Late  
118 Iron Age diversification and expansion across the European continent. A key difficulty in  
119 addressing these questions are the existence of striking differences in the interpretation of the  
120 archaeological record, leading to various hypotheses of correlations with linguistic dispersals  
121 and changes in material culture. Moreover, these interpretations have been difficult to assess  
122 using genomics due to limited ancient genomes and the difficulty in differentiating closely  
123 related populations. Here we integrate multidisciplinary evidence from population genomics,  
124 historical sources, archaeology and linguistics to offer a fully revised model for the origins  
125 and spread of Germanic languages and for the formation of the genomic ancestry of  
126 Germanic-speaking northern European populations, while acknowledging that coordinating  
127 archaeology, linguistics and genetics is complex and potentially controversial. We sequenced  
128 710 ancient human genomes from western Eurasia and analysed them together with 3,940  
129 published genomes suitable for imputing diploid genotypes. We find evidence of a previously

130 unknown, large-scale Bronze Age migration within Scandinavia, originating in the east and  
131 becoming widespread to the west and south, thus providing a new potential driving factor for  
132 the expansion of the Germanic speech community. This East Scandinavian genetic cluster is  
133 first seen 800 years after the arrival of the Corded Ware Culture, the first Steppe-related  
134 population to emerge in Northern Europe, opening a new scenario implying a Late rather than  
135 an Middle Neolithic arrival of the Germanic language group in Scandinavia. Moreover, the  
136 non-local Hunter-Gatherer ancestry of this East Scandinavian cluster is indicative of a cross-  
137 Baltic maritime rather than a southern Scandinavian land-based entry. Later in the Iron Age  
138 around 1700 BP, we find a southward push of admixed Eastern and Southern Scandinavians  
139 into areas including Germany and the Netherlands, previously associated with Celtic  
140 speakers, mixing with local populations from the Eastern North Sea coast. During the  
141 Migration Period (1575-1200 BP), we find evidence of this structured, admixed Southern  
142 Scandinavian population representing the Western Germanic Anglo-Saxon migrations into  
143 Britain and Langobards into southern Europe. During the Migration Period, we detect a  
144 previously unknown northward migration back into Southern Scandinavia, partly replacing  
145 earlier inhabitants and forming the North Germanic-speaking Viking-Age populations of  
146 Denmark and southern Sweden, corresponding with historically attested Danes. However, the  
147 origin and character of these major changes in Scandinavia before the Viking Age remain  
148 contested. In contrast to these Western and Northern Germanic-speaking populations, we find  
149 the Wielbark population from Poland to be primarily of Eastern Scandinavian ancestry,  
150 supporting a Swedish origin for East Germanic groups. In contrast, the later cultural  
151 descendants, the Ostrogoths and Visigoths are predominantly of Southern European ancestry  
152 implying the adoption of Gothic culture. Together, these results highlight the use of  
153 archaeology, linguistics and genetics as distinct but complementary lines of evidence.

154

## 155 **Introduction**

156 The ~5000 BP spread of Steppe-related ancestry is widely acknowledged as a likely *terminus*  
157 *post quem* for the spread of the Indo-European language family to Europe at large <sup>1,2</sup>. In  
158 Northern Europe, the Germanic languages, including German, Dutch, Frisian, English as well  
159 as the Nordic languages, constitute one of the dominant components of the historically known  
160 linguistic landscape, next to Balto-Slavic and Finno-Saamic. Here, the archaeological Corded  
161 Ware culture, including the Battle Axe and Single Grave cultures, as well as the Bell Beaker  
162 culture have been proposed as vectors for the introduction of Germanic languages <sup>3-7</sup>.  
163 However, a significant time gap of 2~3 millennia exists between these first waves of Steppe-  
164 related ancestry (c. 5000 - 4500 BP) and the appearance of the oldest Germanic runic writings  
165 in the first centuries CE <sup>8</sup>. Given the current lack of data, it cannot therefore be excluded that  
166 undocumented demographic changes during this intervening period shaped Northern  
167 Europe's linguistic landscape over the past 4,000 - 4,500 years <sup>9</sup>. During and especially  
168 before the Bronze Age, little is known about the distribution of the predecessor of the  
169 Germanic languages, at which stage it is referred to as Palaeo-Germanic <sup>10</sup>. Lexical  
170 borrowing from Celtic <sup>11</sup> and into Finno-Saamic <sup>12,13</sup> is estimated to have occurred from the  
171 Late Bronze Age (3050 - 2500 BP), demonstrating its geographic position relative to these  
172 linguistic groups. However, in the absence of other linguistic evidence, the timing of the



173 arrival of Palaeo-Germanic in Scandinavia as well as its trajectory from the Indo-European  
174 homeland still remains elusive<sup>14-16</sup>.

175

176 The northern European Iron Age (~2800 - 1575 BP) and the Migration Period (~1575 - 1200  
177 BP) are characterised by a series of revolutionary transitions: the ‘democratisation’ of  
178 metallurgy through ease of access to iron<sup>17</sup>, the rise and fall of the Western Roman Empire<sup>18</sup>  
179 and the subsequent ‘barbarian’ invasions into and within Europe<sup>19-21</sup>. A series of large-scale  
180 violent events dominated the political scene and were associated with recruiting warriors  
181 from a large and mixed origin<sup>22</sup>. These events coincided with pervasive linguistic shifts,  
182 which are still reflected in the present-day European linguistic landscape. Here, for the first  
183 time we link these dramatic and contested changes with genetic evidence to determine if they  
184 were linked to population movements in northern Europe. Around the middle of the 3rd  
185 millennium BP, Palaeo-Germanic saw the effects of a set of defining sound changes, by  
186 which it developed into Proto-Germanic, the most recent common ancestor of all Germanic  
187 descendant languages<sup>10,23,24</sup>. The Proto-Germanic speech community is assumed to have  
188 existed in Southern Scandinavia and Northern Germany throughout the Pre-Roman Iron Age  
189 (2500 - 1950 BP)<sup>25,26</sup>, with the likely cultural sources being the Nordic Iron Age and the  
190 Jastorf culture<sup>16,27</sup>. From the end of the Pre-Roman Iron Age, Proto-Germanic language  
191 continuum split into East, North and West Germanic, the latter two likely forming a subclade  
192<sup>28-31</sup>. The process coincided with multiple phases of expansion towards the south related to  
193 the fall of the Western Roman Empire, ultimately affecting the major civilizational centres of  
194 the Mediterranean in the Migration Period<sup>32</sup>.

195

196 Of the East Germanic-speaking groups, the Goths were prominent actors in Late Antiquity.  
197 They settled in South-East Europe by 1850 BP<sup>33</sup>. Following the Hunnic invasion, some  
198 Goths entered the territories of the Roman Empire, contributing to its fall, and established  
199 two kingdoms, one in Italy and another in France and Iberia. However, the pre-Migration  
200 Period origin of the Goths is contested. Their own oral history records an exodus from  
201 Scandinavia across the Baltic Sea<sup>34-37</sup>. Combined with toponymical evidence<sup>38</sup>, this resulted  
202 in theories of Sweden as the homeland for the Goths<sup>35,36,39</sup>. Modern scholarship, especially  
203 from the field of history, have questioned these lines of evidence, and challenged the idea of a  
204 Scandinavian origin<sup>40,41</sup>. In addition, archaeologists have questioned traditional  
205 interpretations of the East European Wielbark culture as a vector for the Goths<sup>42</sup>.

206

207 Of the West Germanic-speaking groups several movements subsequent to the East Germanic  
208 expansion took place into areas previously inhabited by British Celtic and East Scandinavian  
209 populations. One such West Germanic group is the Langobards, who similarly traced their  
210 origins back to Southern Denmark or Northern Germany<sup>43,44</sup>. Roman author Tacitus places  
211 them around the lower Elbe in the 1st century CE, spread south through Czechia, Hungary,  
212 and eventually established a kingdom in Italy from 1350 BP. To the west, in parts of Britain,  
213 immigrating West Germanic Anglo-Saxons replaced local Celtic speaking populations. While  
214 previous studies have shown that some Goths, Langobards and Anglo-Saxons carried  
215 Scandinavian ancestry, confirming the specific origin within Scandinavia has not been  
216 possible<sup>45-48</sup>. Whereas the Migration Period was traditionally defined as a period of ‘folk

217 migrations' of Germanic and other tribes, recent scholarship is highly divided over the scale  
218 of these population movements as well as the authenticity of the origin stories of 'Barbarian'  
219 peoples<sup>37,40,49-52</sup>. Thus, the northern European origins, as well as the potential genetic impact  
220 of these peoples on their regions of settlement, remain heavily disputed.

221

222 In Scandinavia, the populations continued to speak Northwest Germanic dialects well  
223 documented in runic inscriptions<sup>53</sup>. During the Migration period (1575 - 1200 BP), radical  
224 changes led to the transformation of these dialects into Old Norse, the language spoken by  
225 Viking Age Scandinavians from ~1200 until 800 BP<sup>54</sup>. The 350 years after ~1575 BP, which  
226 encompassed this period of cultural and linguistic change, was a time of great upheaval in  
227 Western and Northern Europe. The period saw volcanic activity resulting in global decreased  
228 temperatures<sup>55</sup> and reduced plant growth in Scandinavia, the Justinian plague and population  
229 collapse and recovery (Supplementary Note S7.3, S7.4). To what extent the formation of Old  
230 Norse may have been linked to these phenomena remains debated.

231

232 Hitherto, genetic evidence to collate with the events described above has been lacking. In the  
233 wake of two large-scale population replacements across Europe during the Holocene, studies  
234 of ancient and modern genomes have suggested a period of relatively stable population  
235 structure since the European Bronze Age 5,000 - 3,000 BP, with a gradient of higher  
236 ancestry from Neolithic Farmers in southern Europe to higher ancestry from Bronze Age  
237 Steppe Pastoralists in Northern Europe<sup>1,2,56</sup>. This genetic continuity contrasts with ideas of  
238 the Iron Age and subsequent Migration Period (~2800 - 1200 BP) in Northern Europe as  
239 considered by many archaeologists, historians and linguists to be the periods that shaped  
240 modern Europe<sup>17,18,37,57</sup>. Migrations within Europe over the last 5,000 years would have  
241 represented interactions by much more closely related populations than the arrival of the  
242 Neolithic Farmers and Bronze Age Steppe Pastoralists, limiting the possibility of their  
243 detection in ancient DNA studies.

244

245 Recent studies have shown that with dense ancient DNA sampling, at sufficient sequencing  
246 depth for imputation (~0.1X for whole genomes), the detection of fine scale population  
247 structure in closely related ancient populations is possible<sup>58-60</sup>. To investigate the spread and  
248 diversification of Germanic-speaking populations, we sequenced 710 ancient genomes (Table  
249 , Supplementary Note S1A and S1B) from human populations across western Eurasia, with a  
250 focus on the northern European Iron Age and the bordering Celtic-speaking region of western  
251 Europe (Figure 1). Together with published ancient genomes from around the world, we  
252 selected samples with suitable average depth of coverage for imputation based on previous  
253 studies<sup>59-61</sup>. After filtering and overlapping with the wealth of publicly available SNP  
254 capture data suitable for imputation (~1X on targeted SNPs for 1240k capture), the final  
255 dataset contained 578 new and 3,939 published individuals covering 697,179 SNPs  
256 (Supplementary Note S5).

257

258

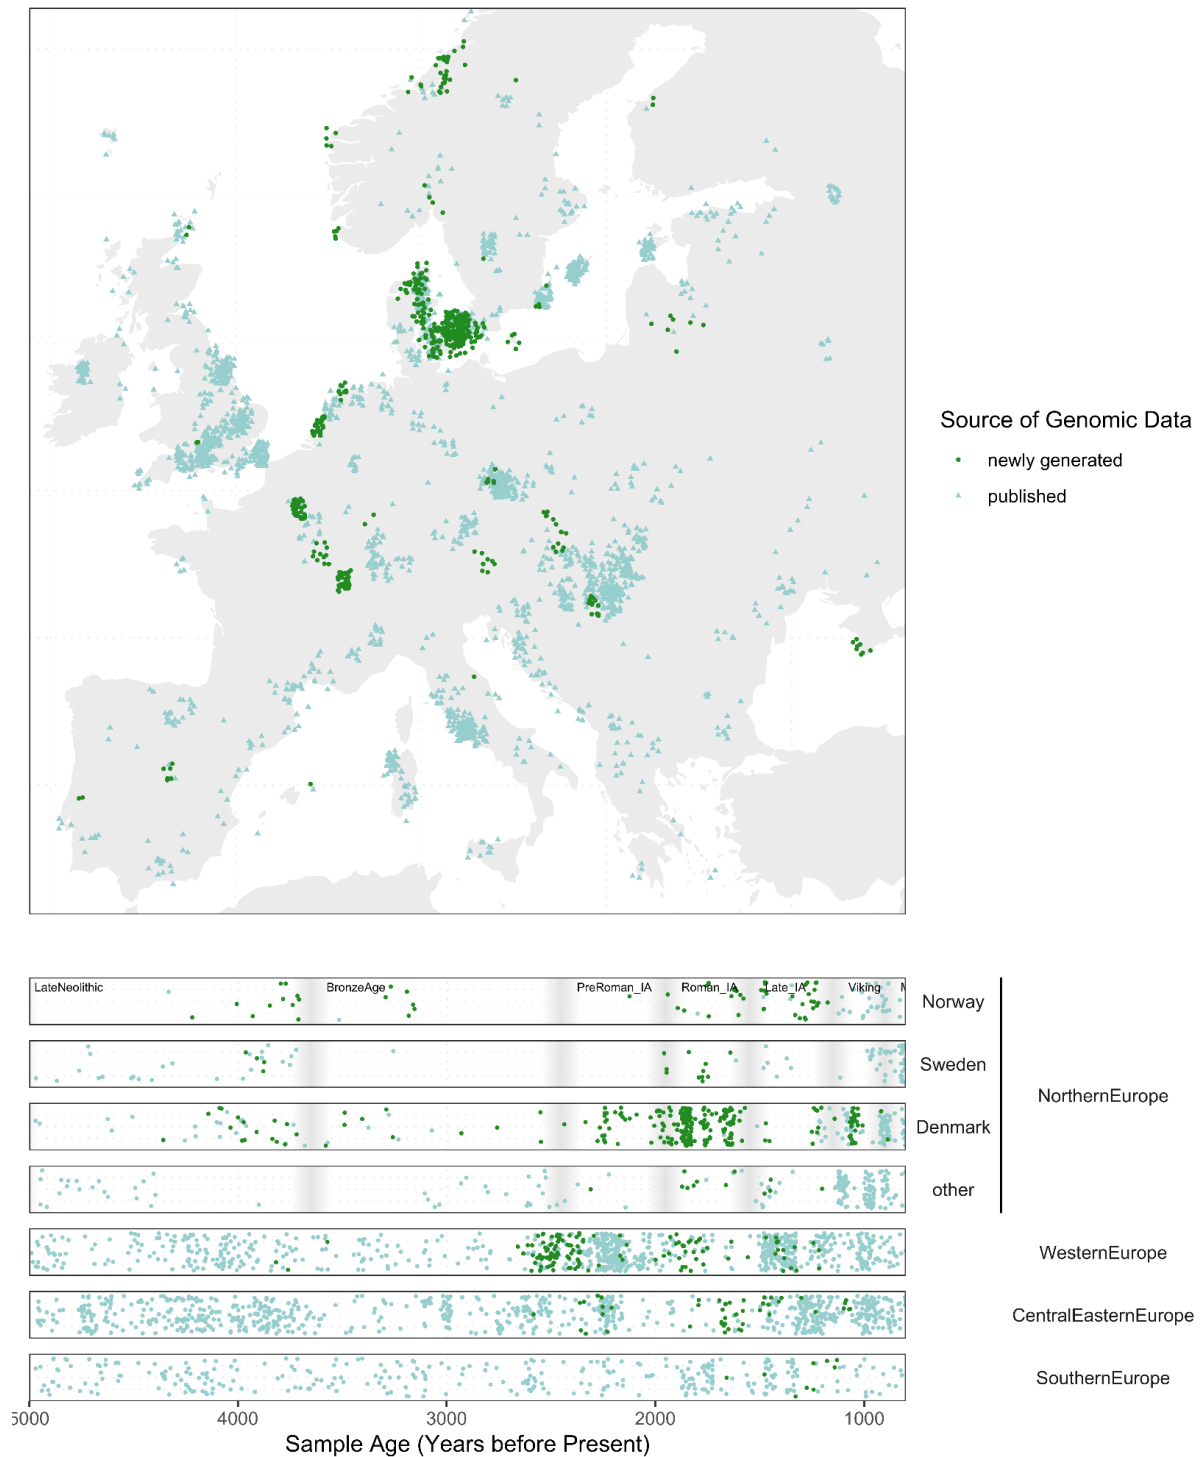

259

260

261

262

263

264

265

266

*Figure 1. Geographic and temporal sampling of a subset of ancient individuals included in the final dataset, showing all newly generated (green) and published (light blue) ancient individuals from the Late Neolithic / Early Bronze Age throughout the Viking Age. Grey bars represent the boundary between historical periods denoted in the top panel.*

## **Fine-scale resolution of Steppe ancestry in the European BA**

267 For the previously detected major migrations in Europe, the use of f-statistics have been  
268 sufficient to confirm demographic transitions between deeply divergent populations.  
269 However here, the migrations in question here are between populations that are much more  
270 closely related, making these tools unsuitable. As such, we instead explored the genomic  
271 affinities between all the individuals in the entire dataset using the identity-by-descent (IBD)  
272 hierarchical clustering method and mixture modelling described in <sup>60</sup> which is particularly  
273 powerful for discerning closely related genomic ancestries.

274  
275 Here, clusters are formed on the basis of the long shared genomic segments between all pairs  
276 of individuals within the dataset, rather than by proportions of the deeply diverging ancestries  
277 that they carry. This hierarchy of the clusters is informative of regional and temporal genetic  
278 structure (Figure S6.4.1.1, S6.4.1.2, S6.4.1.3). However, this clustering can be misleading in  
279 instance of admixture, exemplified by the Western Scandinavian 0\_1\_6 cluster. In Western  
280 Scandinavia there has been multiple waves of migration from Eastern Scandinavia, which has  
281 resulted in the earliest and latest individuals in this cluster share vary little ancestry.  
282 However, intermediate samples with varying levels of admixture form a link between the  
283 early and late individuals, giving a false impression of continuity.

284  
285 To overcome this limitation, we relied on the IBD Mixture Modelling (ref) to assess the  
286 genetic structure within the clusters (Supplementary Note 6.5). In brief, we create ‘palettes’  
287 for each individual, based on the length of IBD segments shared with all clusters in the  
288 dataset. We then define a set of individuals from specific cluster as “sources”, and model the  
289 remaining individuals in the dataset (“targets”) as a mixture of all possible source palettes,  
290 using a NNLS, similar to chromosome painting <sup>62</sup>. By beginning with the most distal sources  
291 relevant to Europe during the Holocene (Western Hunter Gatherers, Eastern Hunter  
292 Gatherers, Caucasus Hunter Gatherers, early Anatolian Farmers) and a series of out groups  
293 (Supplementary Note x) we find admixture proportions for Bronze Age Europeans consistent  
294 with the expectations; for Bronze Age Europe, individuals are modelled in primarily by the  
295 source populations for Yamnaya (Caucasus Hunter Gatherer - CHG, and Eastern Hunter  
296 Gatherers - EHG) and Anatolian Farmer. By including a more proximal source, Yamnaya, the  
297 ancestry previously modelled as CHG and EHG is now modelled by Yamnaya, despite all  
298 sources still being present (Figure Supp ADM). We see similar patterns when including  
299 proximal admixed European Farmers to a more basal set with the distal Anatolian Farmers  
300 and WHG source (Figure Supp ADM2), allowing us to progressively add more source  
301 clusters. When two source clusters are used that are too similar, large error bars appear and  
302 we reject the model.

303  
304 From the IBD clustering, we find that the majority of European individuals from 5000 BP fall  
305 within four main clusters with a varying geographical distinction for each (Figure 2, Figure  
306 S6.4.1.1, Supplementary Note 6.4.1, Table S2). These clusters broadly contain individuals  
307 from Yamnaya-, Eastern Corded Ware-, Northern Corded Ware-, and Bell Beaker-related  
308 archaeological cultures, respectively. Notably, individuals from each cluster are placed  
309 adjacent to each other in a standard western Eurasian PCA (Figure 2, S6.1), and each cluster



310 occupies different positions along the well established cline of Steppe - Farmer ancestry that  
311 formed in Europe from the Bronze Age.  
312  
313

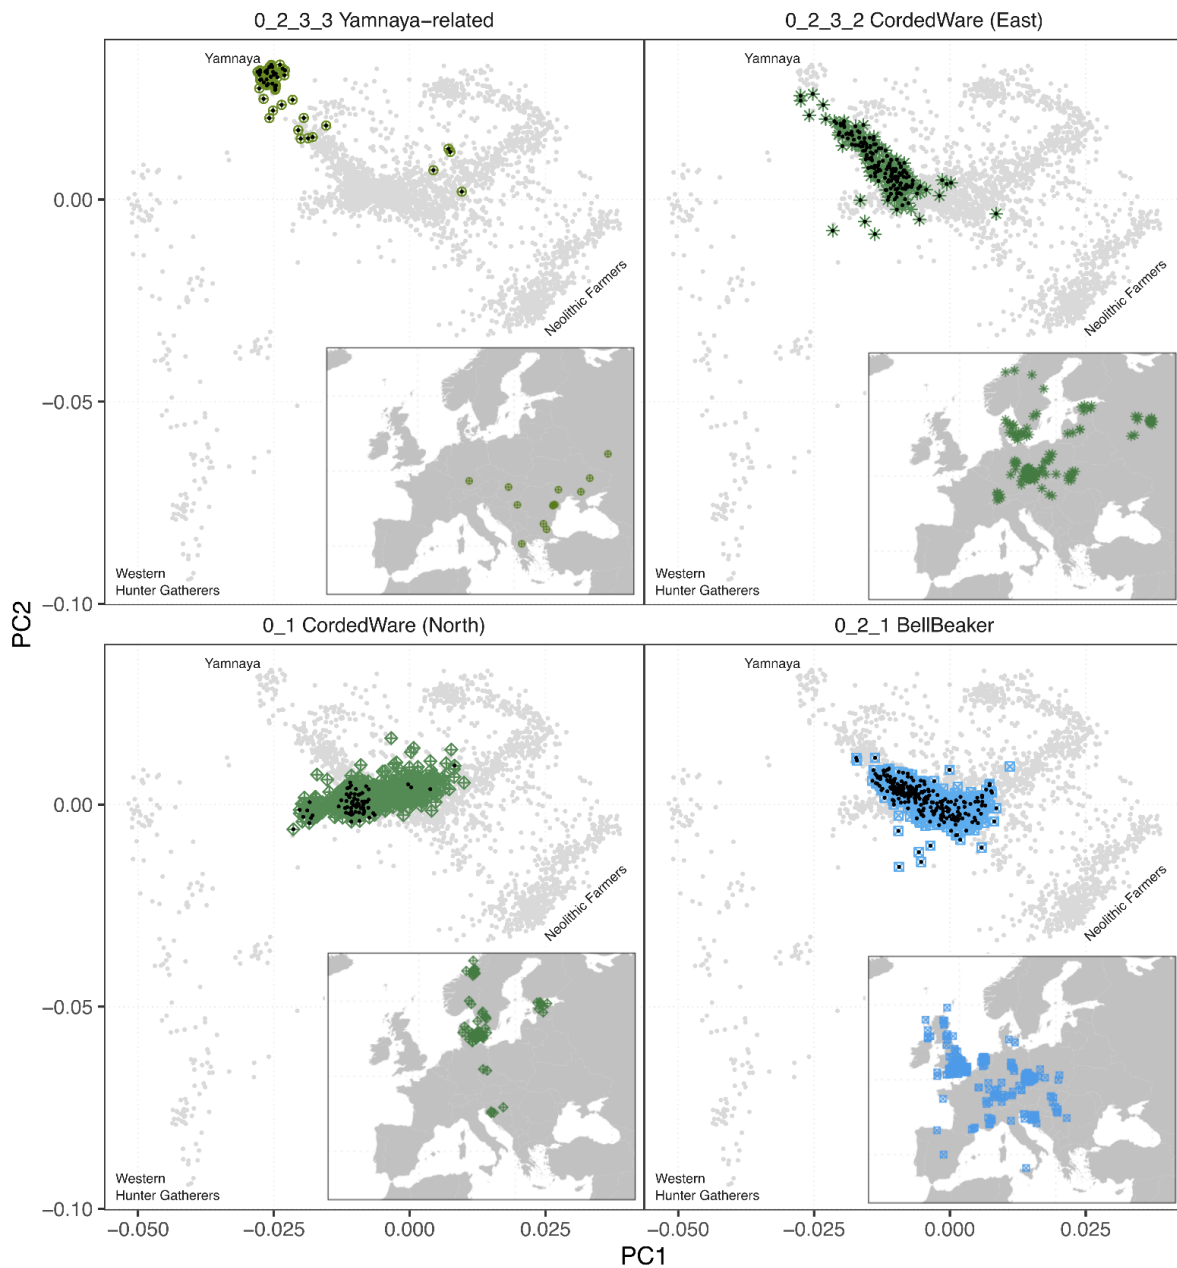

314  
315 *Figure 2. Ancient individuals are highlighted on the western Eurasian PCA and in*  
316 *geographical space for the main four steppe-related clusters. On the PCA, samples older*  
317 *than 2800 BP are indicated with a '.', on the map, only samples older than 2800 BP are*  
318 *shown.*

319  
320 To understand the variation between these clusters in finer detail, we undertook IBD Mixture  
321 Modelling (Supplementary Note 6.5). In Extended Data Figure 1 and Figure S6.5.2.1, we plot  
322 the admixture proportions inferred by the IBD mixture modelling (Supplementary Note S6.2,  
323 Supplementary Fig) on top of the standard western Eurasian PCA to explore the geographic

324 apportionment of each genomic ancestry. We see the relative proportions of Steppe and  
325 Farmer-related ancestry along the Yamnaya-Neolithic Farmer cline in Extended Data Figure  
326 1A and B, the relative proportions of Farming- and WHG-related ancestry along respective  
327 cline in Extended Data Figure 1B and C, and WHG and EHG along the respective cline in  
328 Extended Data Figure 1C and D. Furthermore, this representation of our results revealed a  
329 series of novel genetic clines and provide additional resolution to previously found clines  
330 within the densely overlapping Bronze Age PCA space.  
331  
332

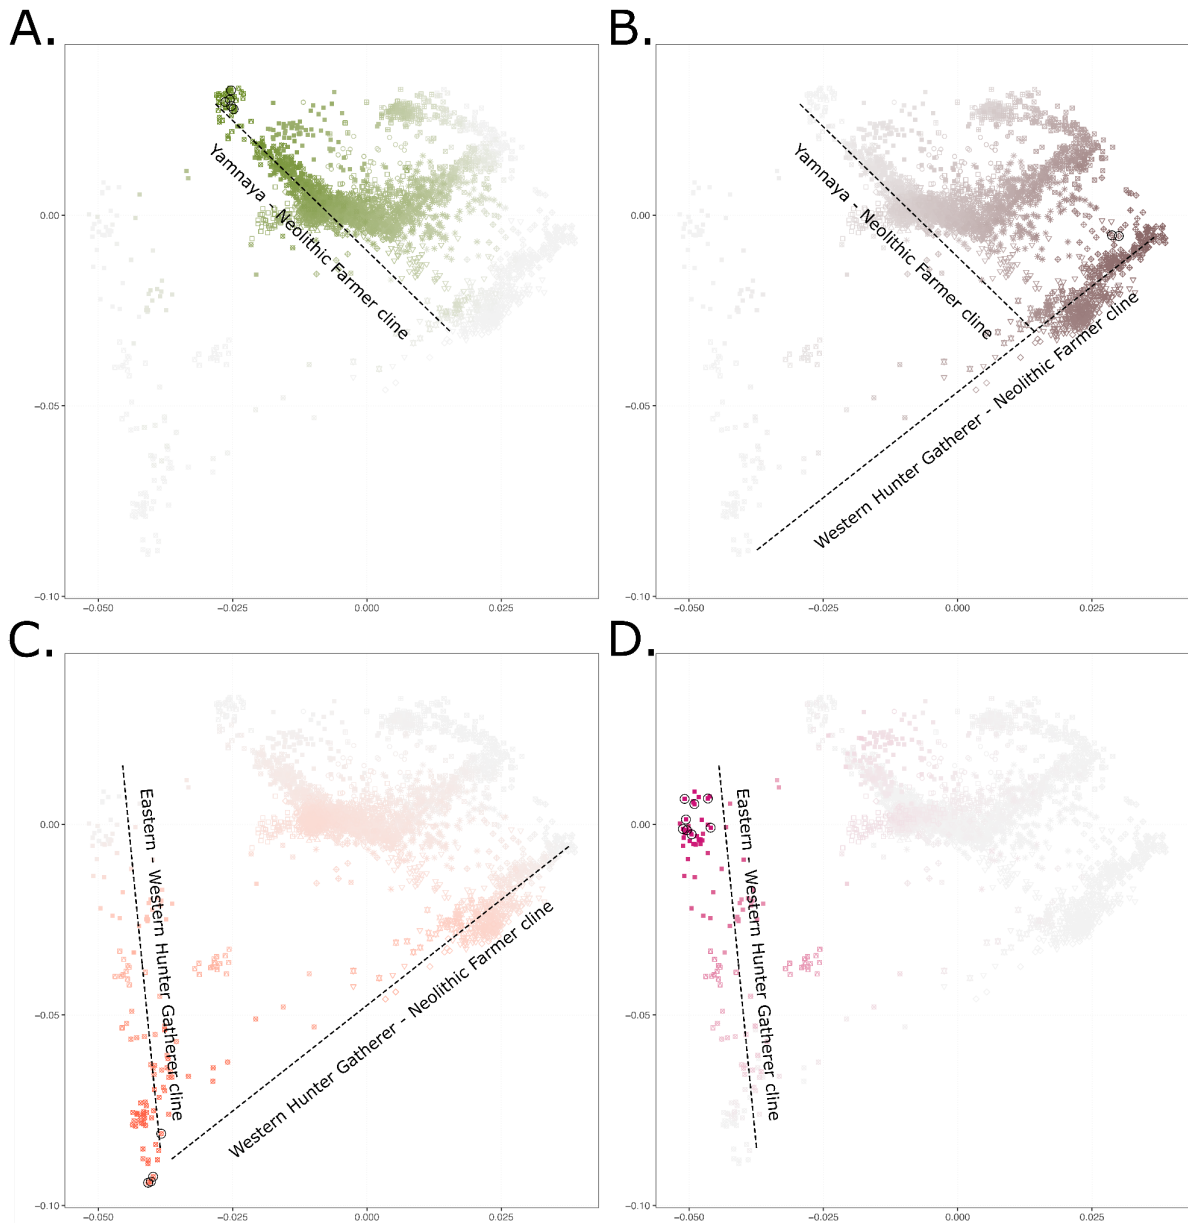

333  
334 *Extended Data Figure 1. A subset of Mixture modelling results from Auxiliary set 1 displayed*  
335 *on the western Eurasian PCA, (Supplementary Note S6.5.2), showing the clines representing*  
336 *the diversity of western Eurasian Hunter-gatherers, the arrival of Neolithic Farmers in*  
337 *Europe admixing with the local Hunter-gatherers, and the arrival of Yamnaya-related*

338 *ancestry admixing with European Farmers. Source individuals are circled, and admixture*  
339 *proportions follow a cline from coloured to grey.*

340

341 We first modelled all individuals in the dataset using representatives of the Yamnaya-,  
342 Corded Ware (East)- and Bell Beaker-related clusters as sources to explore the relationship  
343 between the early individuals from each cluster and later populations in time. To explore  
344 interactions with the farming populations present in Europe during this time, we also included  
345 representatives of three clusters - the Globular Amphora Culture (GAC) of North East  
346 Europe, European Farmers, and Levant / Bronze Age Anatolians. Despite all being modelled  
347 primarily with Neolithic Farming ancestry, they are modelled with small proportions of North  
348 East European Hunter Gatherer (Latvian/Lithuanian), Western Hunter Gatherer (Italy) and  
349 Caucasus Hunter Gatherer ancestry respectively.

350

351 We find that the estimated Yamnaya admixture proportions previously shown to decrease  
352 along the cline connecting Yamnaya individuals and the dense clustering of BA diversity in  
353 Set X (Extended Data Figure 1) to now be modelled by Corded Ware source (Figure 3B). The  
354 decrease corresponds with increasing farming-related ancestry, which is here modelled as  
355 GAC (Figure 3D, Figure S6.5.1.6.). We interpret this cline to correspond to the admixture  
356 with GAC previously documented to occur prior to the arrival of steppe ancestry in Europe<sup>60</sup>.  
357 This cline corresponds to one of the four previously mentioned clusters, the ‘Corded Ware  
358 (East)’ cluster (Figure 2).

359

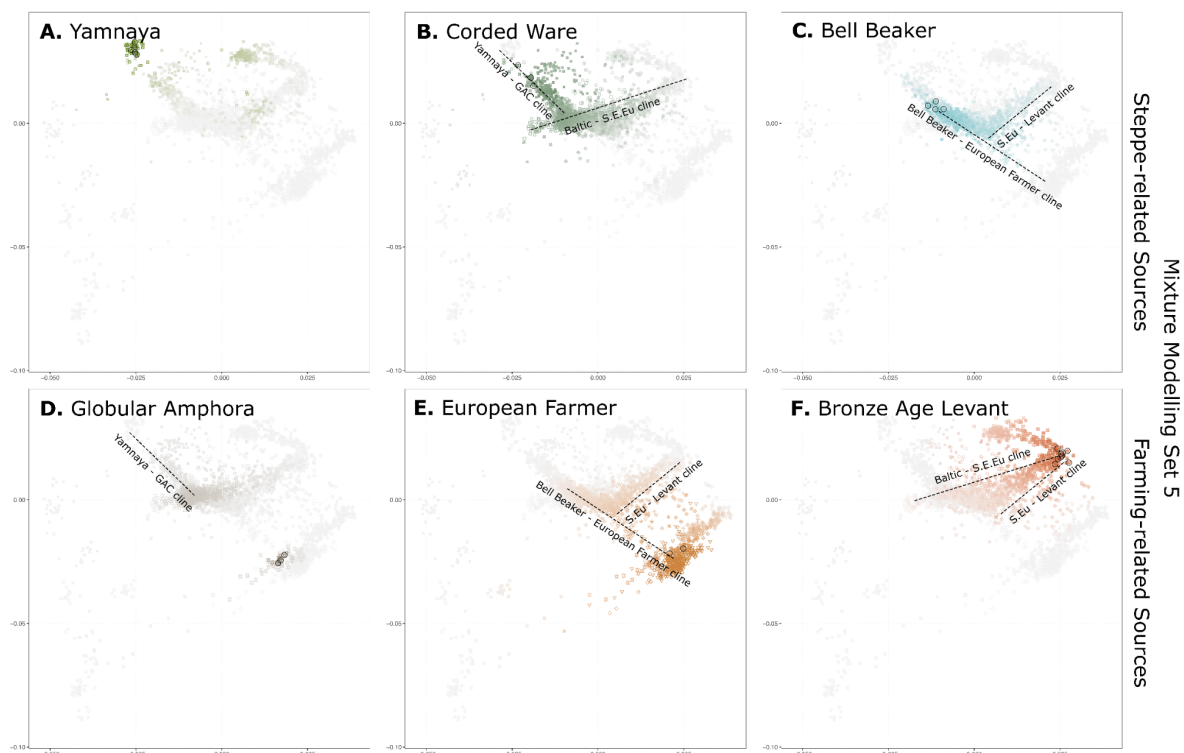

360

361

362 *Figure 3. A subset of Mixture modelling results from Set 5 displayed on the western Eurasian*  
363 *PCA, (Supplementary Note S6.5). A subset of IBD Mixture Modelling results from Set 5.*

364 *Mixture Modelling Proportions for Steppe Ancestry related clusters A) Yamnaya-related, B)*  
365 *Corded Ware-related and C) Bell Beaker-related, and Farming ancestry related clusters: D)*  
366 *Globular Amphora Culture-related, E) European Farmer-related and F) Levant / Bronze Age*  
367 *Anatolia-related. Source individuals are circled, and admixture proportions follow a cline*  
368 *from coloured to grey. Results shown here are a subset of Figure S6.5.1.3.*  
369  
370

371 Overlapping with the admixed European tip of this Corded Ware (East) cline we find a series  
372 of additional clines, representing additional admixture between early European steppe people  
373 already carrying GAC ancestry, and additional farming-related groups in Europe. The first  
374 cline within this diversity extends from this point to the European Farmer cline. The Steppe  
375 ancestry in this cline is modelled by the Bell Beaker-related source (Figure 3C), and the  
376 additional Farming ancestry by the European Farmers (Figure 3E). We interpret this cline to  
377 represent additional admixture with Farming sources within Europe who themselves carry  
378 some Western Hunter Gatherer ancestry. This cline corresponds to another of the four  
379 previously mentioned clusters, the ‘Bell Beaker’ cluster (Figure 2). Very few individuals  
380 within Europe are modelled as ‘Yamnaya’ when the Corded Ware and Bell Beaker source  
381 clusters are included (Figure 3A).  
382

383 From within the Corded Ware (East) and Bell-Beaker diversity we find an additional two  
384 clines extending to the Levant / Bronze Age Anatolians cluster (Figure 3F). The steppe  
385 ancestry of first is modelled as Bell Beaker-related, and corresponds to a sub-cluster (Figure  
386 S6.1.12) within the main Bell Beaker cluster and contains many Hallstatt and La Tene  
387 individuals (Table X), which we interpret as admixture within the range of these cultures,  
388 from France to the Black Sea. However, no suitable Bronze Age source cluster could be  
389 identified, suggesting a higher degree of continuity and complexity within the Bell Beaker  
390 related populations of this region, consistent with previous studies<sup>63</sup>. The steppe ancestry of  
391 the second cline is modelled as Corded Ware (East) ancestry (Figure 3B), and corresponds to  
392 the Corded Ware (North) cline (Figure 2), which we interpret as admixture between  
393 Northeast and Southeast Europe. For both clines, the additional farmer ancestry is modelled  
394 as Levant / Bronze Age Anatolian.  
395

396 The second cline represents admixture with North East Europeans, who form the ‘Corded  
397 Ware (North)’ cline (Figure 2) and are modelled as Corded Ware (Figure 3B) and GAC  
398 ancestry (Figure 3D). Individuals with varying proportions of Corded Ware, Bell Beaker and  
399 Eastern Mediterranean Bronze Age ancestry are present as a cloud between the two clines.  
400 Entering this cloud at various angles we find three Corded Ware (North) sub-clusters (Eastern  
401 Scandinavian, Southern Scandinavian, Baltic) and one Bell Beaker subcluster (Eastern North  
402 Sea), which we interpret as admixture into different regions of Europe with varying  
403 proportions of the farming-related sources (Extended Data Figure 2).  
404



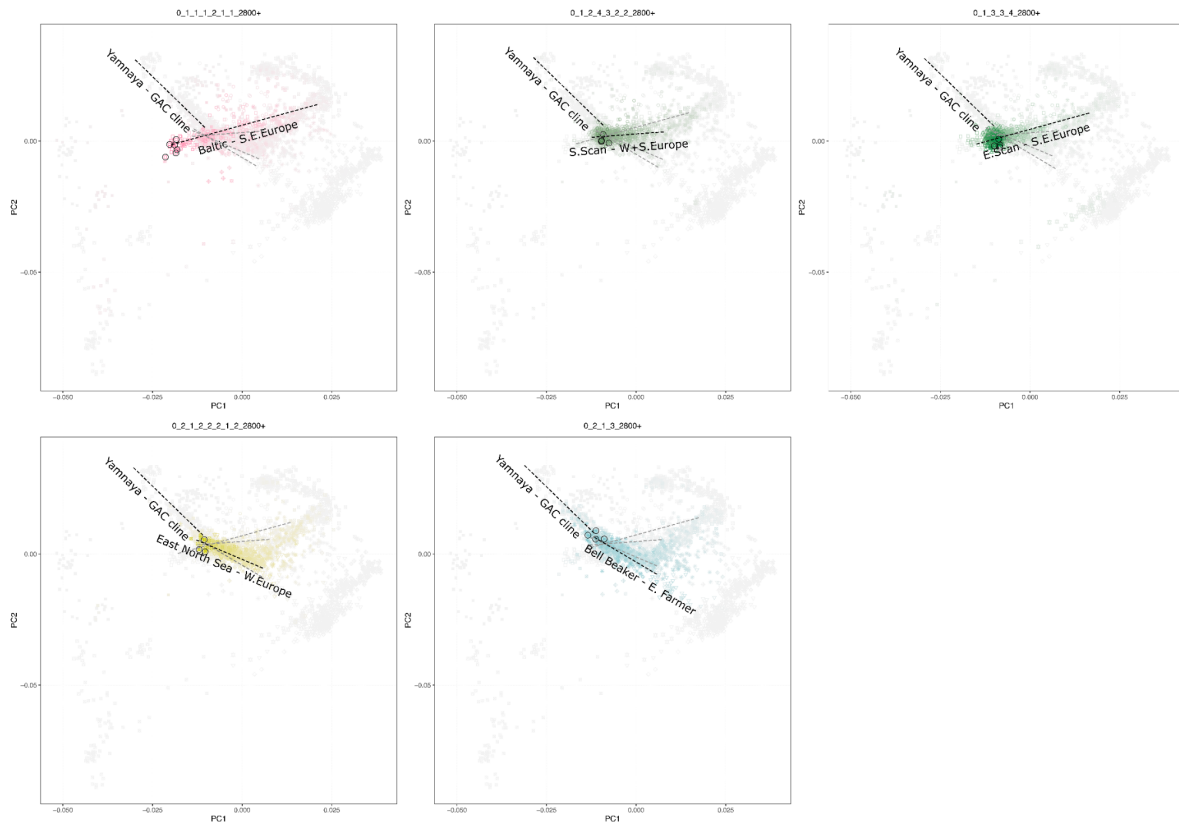

405

406 *Extended Data Figure 2. A subset of Mixture modelling results from Set 5 displayed on the*  
407 *western Eurasian PCA, (Supplementary Note S6.5), showing a admixture proportions for a*  
408 *series of sub-clusters from the Corded Ware and Bell Beaker clusters, revealing clines*  
409 *admixing with groups of varying European Farmer and Bronze Age Western Mediterranean-*  
410 *related ancestry. Source individuals are circled, and admixture proportions follow a cline*  
411 *from coloured to grey.*

412

413 We find an additional cline at the other end of the Corded Ware (North) cluster, extending  
414 towards the Eastern Hunter-gatherers. At the end of this cline, we find Estonian Bronze Age  
415 individuals of the ‘Baltic’ sub-cluster with modelled with additional Eastern Hunter Gatherer  
416 ancestry, corresponding to their position in the PCA. Notably, the presence of this ancestry  
417 makes the Baltic sub-cluster distinct from the other Corded Ware (North) sub-clusters. Even  
418 the Bronze Age individuals with the highest Farmer ancestry from this cluster have higher  
419 Eastern Hunter Gatherer ancestry than any Bronze Age individual from the other Corded  
420 Ware (Northern) sub-clusters, despite its southern location in Croatia (Figure S6.5.1.4).

421

422 Many of the Bronze Age and later Southern European individuals cluster with Neolithic  
423 Farmers, as they only carry small amounts of Steppe Ancestry (Supplementary Note S6.4).  
424 To identify the source of Steppe Ancestry in these individuals, we applied IBD mixture  
425 modelling (Figure M, Suppl section IBD MM) with representatives of the Yamnaya, Corded  
426 Ware and Bell Beaker clusters, and find the steppe ancestry of the majority of these more  
427 southern individuals to be modelled as Bell Beaker-related ancestry (Figure 4, Source Set 5,  
428 Supplementary Note 6.5). By the late Bronze Age onwards, irrespective of clusters, the  
429 Steppe ancestry in almost all Europeans can be well modelled by Northern Corded Ware or

430 the Bell Beaker sources (Figure 4). Almost all samples modelled primarily as Corded Ware,  
431 Bell Beaker and Yamanaya-related ancestry fall within the regions prescribed to each culture  
432 in the archaeological literature (Figure 4).

433

434

## Mixture Modelling Results for Steppe Ancestry

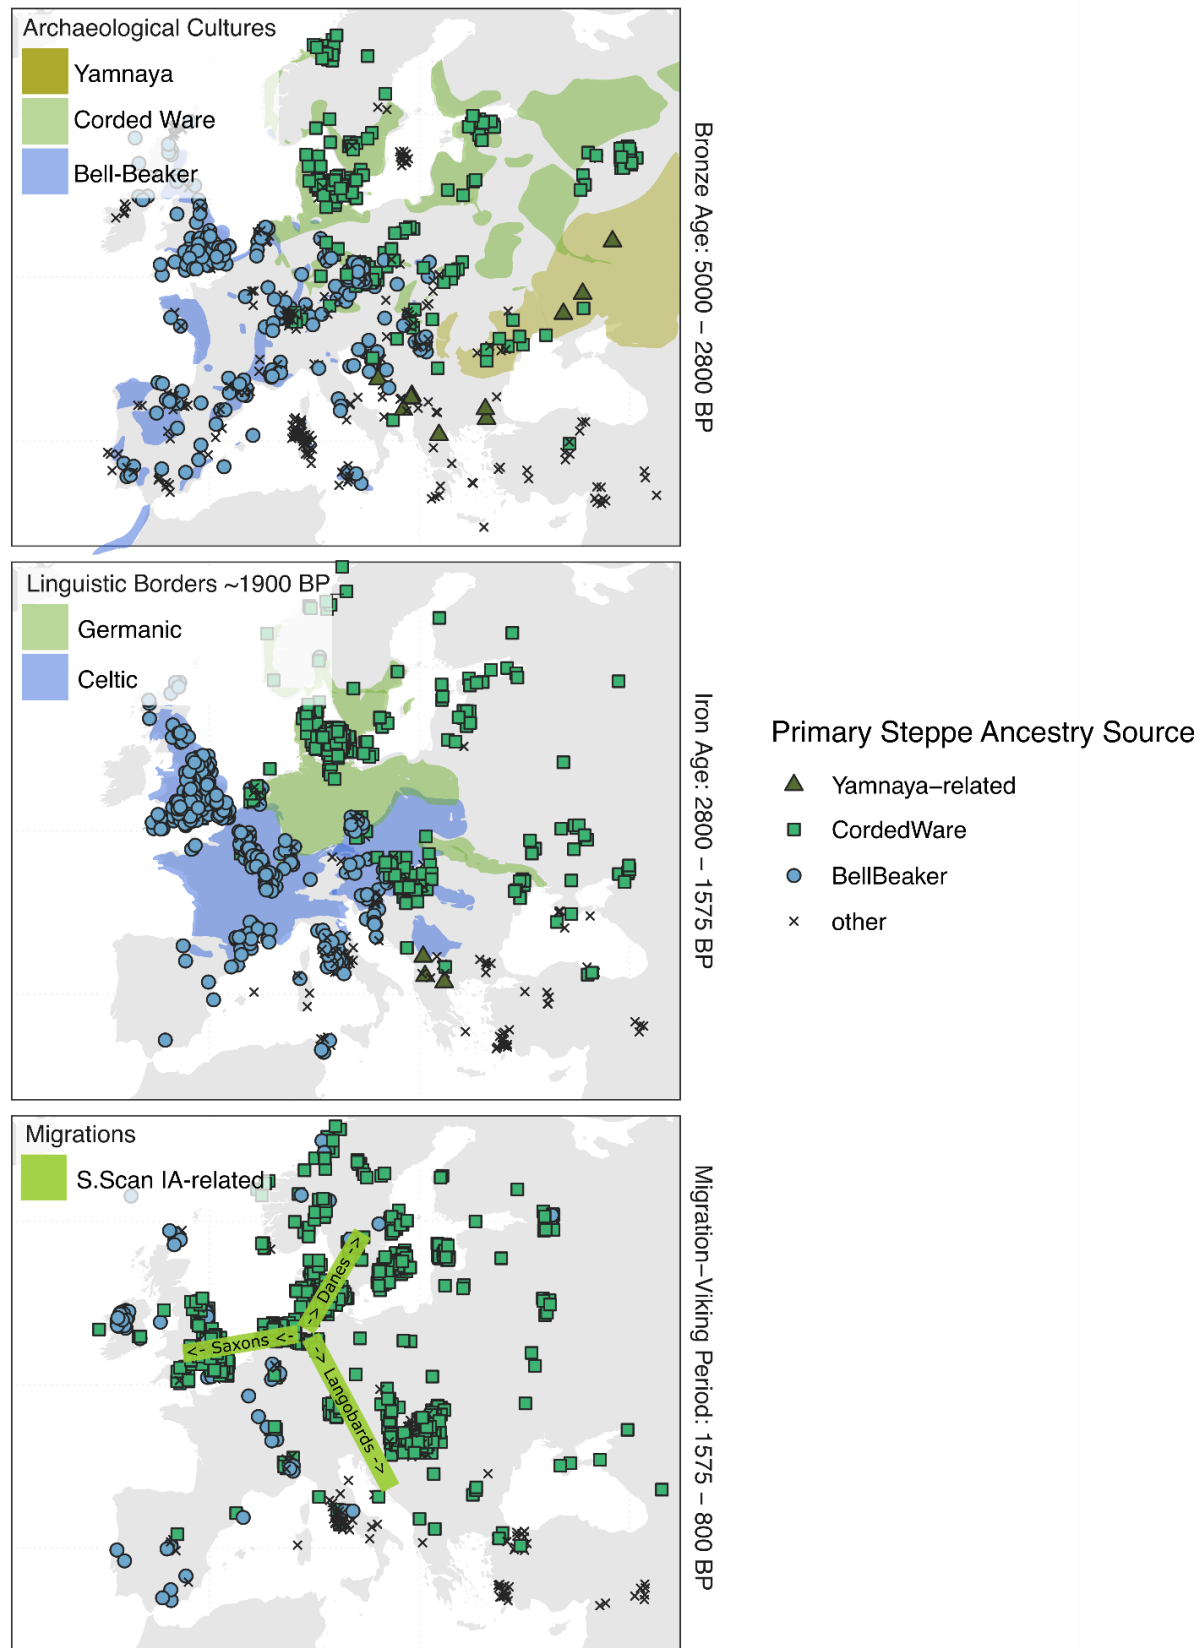

435

436

437

*Figure 4. Geographical distributions of major Archaeological Cultures and Language Families and contemporaneous Steppe Ancestry Source. Individuals with less than 10%*

438 *Steppe Ancestry, or less than 66% from one of the source groups are indicated with an 'x'.*  
439 *Archaeological boundaries modified from* <sup>64</sup>.

440

441

442 The border between these Corded Ware and Bell Beaker Steppe ancestries remains relatively  
443 stable throughout the Iron Age, until the fall of the Roman Empire (Figure 4). Beginning in  
444 the Migration Period, we see a southward shift of these borders. In Britain, the beginning of  
445 the Anglo-Saxon period has previously been linked to a demographic movement from  
446 continental Europe <sup>47,65</sup>; this transition is reflected here in the shift among individuals from  
447 the Bell Beaker to Corded Ware clusters. In addition, we see a similar but slightly earlier  
448 result for the Netherlands and Germany (Figure S6.3.1.1). The presence of Bell Beaker-  
449 related ancestry in the Norwegian Viking Period represents previously documented  
450 migrations from Celtic regions within Britain and Ireland, however here we detect these  
451 migrations as early as the Iron Age (1242 BP, Figure S6.4.2.1).

452

### 453 **Population dynamics in Scandinavia from the LNBA to Iron Age**

454 In order to identify whether migrations had occurred within Northern Europe, understanding  
455 the substructure within the Bronze Age populations of this region was necessary. We  
456 therefore reclustered all ancient samples older than 2800 BP, to remove the impact of later  
457 admixture between structured populations present in the Bronze Age (Supplementary Note  
458 6.4.2, Supplementary Table x). Within Scandinavia, three clusters are apparent (Extended  
459 Data Figure 4): 1) an early Scandinavian cluster, including the oldest Swedish (Battle Axe  
460 Culture) and Danish samples and almost all Norwegians, 2) a later 'Southern Scandinavian'  
461 cluster restricted to Denmark and the southern tip of Sweden, and 3) a second later 'Eastern  
462 Scandinavian' cluster, spread across Sweden and overlapping with that of the Southern  
463 Scandinavia cluster. In all three instances, there is a very close correspondence between Y-  
464 haplogroups and the IBD clusters (Extended Data Figure 4A), largely driven by different  
465 frequencies of haplogroups I1a-DF29, R1a1a1b1a3a (R1a-Z284) and R1b1a1b1a1a1 (R1b-  
466 U106), which are all strongly associated with Scandinavian ancestry (Supplementary Note



467 6.4.2).

**A.** Scandinavian IBD Clusters (from pre-2800BP clustering)

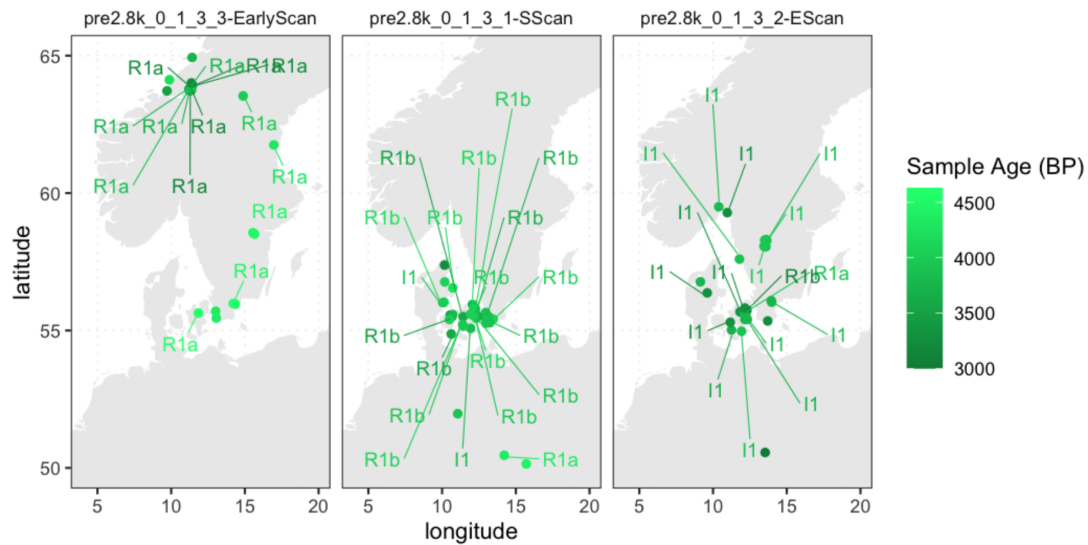

**B.**

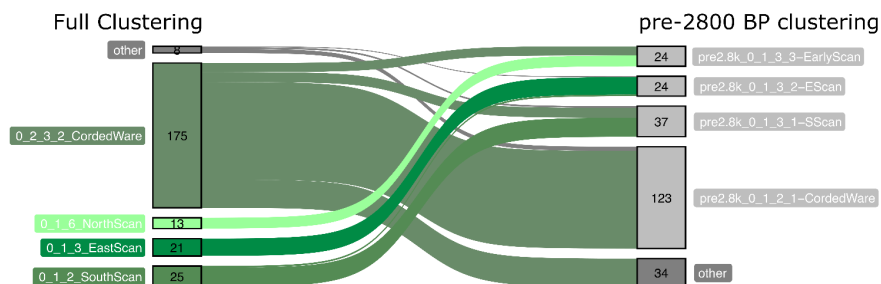

468  
469

470 *Extended Data Figure 4. (A) Geographical distribution of individuals within the*  
471 *Scandinavian Clusters from the pre-2800 BP re-clustering. For males with sufficient*  
472 *coverage, major Y-haplogroups are noted. (B) Sankey diagram showing the correspondence*  
473 *between the three main Scandinavian clusters and the Eastern Corded Ware clusters in the*  
474 *Full and pre-2800 BP clustering,*

475  
476

477 We find a large degree of overlap between the Early, Southern and Eastern Scandinavian  
478 clusters of the pre-2800 BP individuals and three subclusters detected in the original northern  
479 Corded Ware cluster: Western, Southern and Eastern Scandinavian respectively  
480 (Supplementary Extended Data Figure 4B, Supplementary Note S6.4.2). A clear difference  
481 between the two clustering runs is the reduction from 175 to 123 individuals in the Eastern  
482 Corded Ware cluster in the pre-2800 BP clustering. Many of these individuals are instead  
483 found in clusters from Northern Europe in the pre-2800 BP clustering. The pre-2800 BP  
484 Early Scandinavian cluster contains 24 individuals rather than 13 in the corresponding  
485 Western Scandinavian cluster in the full clustering. Similarly, the pre-2800 BP Southern  
486 Scandinavian cluster sees 37 individuals rather than 25. From mixture modelling results  
487 (Figure S6.4.2.4), we see that the samples that moved from the Eastern Corded Ware cluster  
488 in the original modelling are modelled with the smallest amounts of the Eastern, Western and

489 Southern Scandinavian that is widespread from the late Bronze Age onwards. In contrast,  
490 from 4000 BP almost all Scandinavians are well modelled as combinations of Eastern,  
491 Western and Southern Bronze Age ancestries. Combined, the results suggest a structured  
492 population in Scandinavia present from ~4600 - 4000 BP.

493

494 From the more basal set of sources (Set 1) for themixture modelling, we find Yamnaya  
495 related ancestry to be modelled as Eastern Hunter-gatherer and Caucasus Hunter-gatherer  
496 (Figure S6.5.1.10, S6.5.1.1, S6.5.1.2, S6.5.1.3), as expected<sup>66</sup>. However, the pre-2800 BP  
497 Eastern Scandinavians are distinct in the relatively high proportion of Eastern Hunter-  
498 gatherer ancestry, compared to Northern and Western Scandinavians (Figure S6.5.1.6,  
499 S6.5.1.4). To identify the specific source of this Hunter-gatherer ancestry, we included  
500 additional Hunter-gatherer sources from the region (Norway, Sweden, Latvia and Lithuania,  
501 Denmark) together with Yamanya and find the Eastern Scandinavians hunter-gatherer  
502 ancestry modelled entirely by the Latvian HG source from across the Baltic, rather than the  
503 local Scandinavian hunter gatherers (Extended Data Figure 5, Figure S6.5.1.4,  
504 Supplementary Note S6.5.1). In contrast, the Southern and Western Scandinavians are  
505 modelled with additional Western Hunter-gatherer ancestry (Italian source clusters). These  
506 admixture results are consistent with the subtle differences in the distribution of the  
507 Scandinavian clusters in the western Eurasian PCA (Supplementary Note 6.1).

508

509 The clustering of the Eastern, Northern and Western Scandinavian sub-clusters within the  
510 Corded Ware (North Cluster) and the steppe ancestry being modelled as Corded Ware (East)  
511 points to a shared history as part of the Corded Ware expansions. However, first detection of  
512 Eastern Scandinavians 800 years after the earliest Corded Ware people in Scandinavia, and  
513 the presence of a Hunter-gatherer ancestry not local to Scandinavia points to an additional,  
514 late arrival into Scandinavia by the ancestors of the Eastern Scandinavians.

515

516

517

518

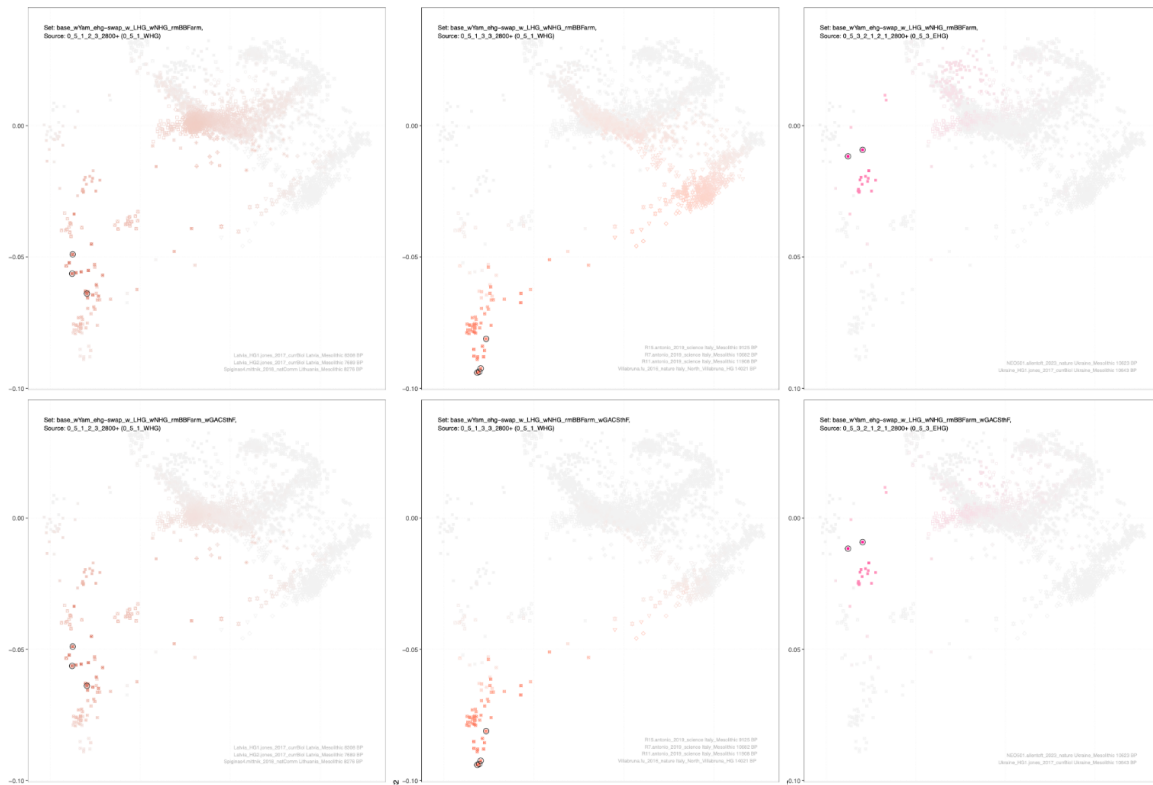

519

520 *Extended Data Figure 5. Mixture Modelling sets showing the Hunter Gatherer admixture in*  
521 *Europe. Row 1 (set X) has no admixed source populations, showing Western Hunter*  
522 *Gatherer ancestry in European Farmers, North Western Hunter Gatherers (Latvia, Lithuania)*  
523 *admixture in GAC, and Eastern Hunter Gatherer along the 'Baltic' cline. The second row*  
524 *(set Y) includes the admixed Farmer populations, showing the required additional North*  
525 *Western Hunter Gatherer ancestry in Eastern Scandinavians and Eastern Hunter Gatherer*  
526 *ancestry in the Baltic cline.*

527

528

529 While the steppe ancestry in the northern European clusters are modelled primarily by the  
530 Corded Ware source and the western European clusters by the Bell Beaker source, a Bronze  
531 Age Eastern North Sea (ENS) cluster from the coastal region in the overlap between the two  
532 cultures is modelled with equal proportions (Figure S6.5.1.7, Suppl Note S6.9.2). This result  
533 is also reflected in the position of these Bronze Age samples in the western Eurasian PCA,  
534 between the oldest Bell Beaker and Northern Corded Ware samples (Supplementary Note  
535 6.1, Figure S6.1.13). When using an early Bronze Age cluster representing this population,  
536 we see genetic continuity between 3700 BP and 1700 BP with little evidence of admixture.

537

538 With representatives of each of the additional northern European Bronze Age source clusters,  
539 we resolve in more detail the extent of a previously documented expansion of Eastern  
540 Scandinavian ancestry<sup>59,60</sup>. By the Iron Age in Scandinavia, almost all individuals are  
541 modelled with >50% Eastern Scandinavian ancestry. The impact of this expansion is most  
542 apparent on the Danish Islands, followed by Norway (Supplementary Note S6.9.4) and  
543 finally the Danish peninsula of Jutland (Figure 5).

544

545  
546

### Bronze Age Modelling Sources for Iron Age Period: 2000 – 1575 BP

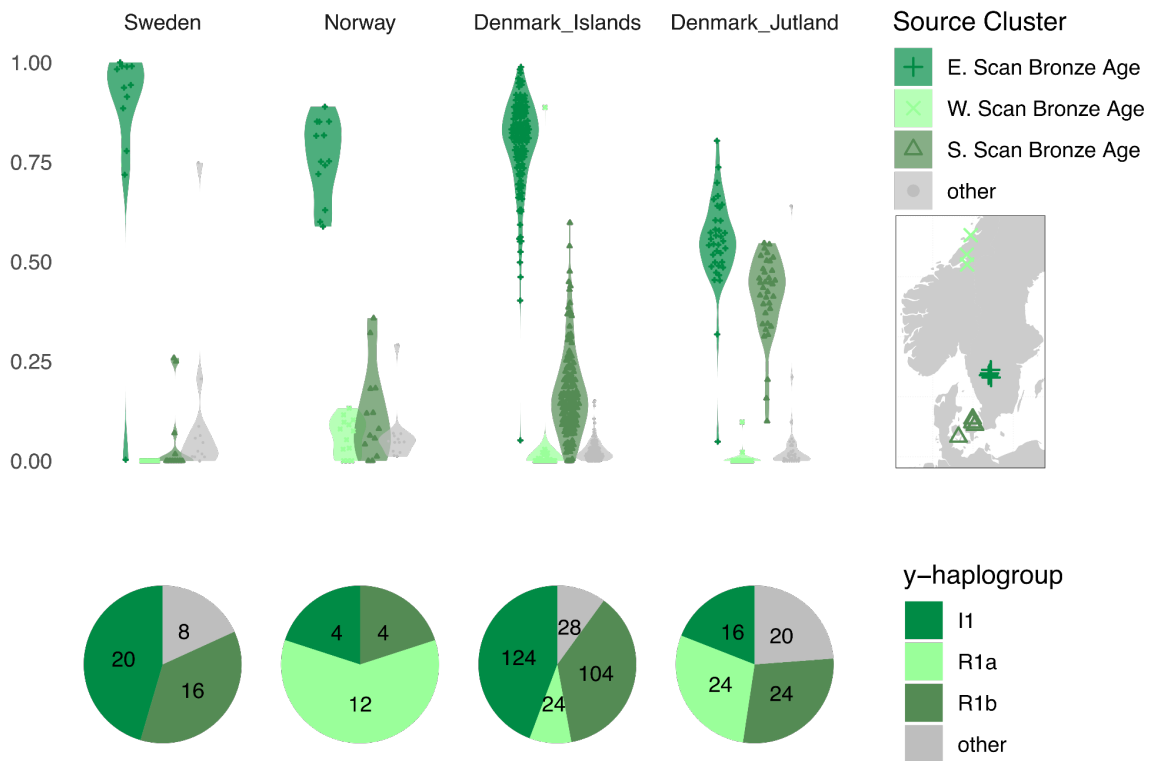

547  
548  
549

550 *Figure 5. A) Violin Plots showing the proportion of Bronze Age Scandinavian ancestries for*  
551 *each Iron Age individual from Sweden, Norway and Denmark. The highest proportions of*  
552 *E.Scan, W.Scan and S.Scan Bronze Age ancestry are in the local region, despite E.Scan BA*  
553 *being the highest on average in all regions. B) Pie charts showing the proportions of the Y-*  
554 *haplogroups for the Iron Age regions. Despite the low proportion of Western Scandinavaian*  
555 *Bronze Age ancestry in the Norwegians, the proportion of the corresponding R1a*  
556 *haplogroup is high.*

557

558 During the Bronze Age, there are a number of admixed Norwegian and Danish Bronze Age  
559 outliers who carry local and Eastern Scandinavian ancestry. When including these admixed  
560 clusters as sources, we find the Scandinavian ancestry of Iron Age Jutlandic individuals  
561 modelled entirely as the admixed Danish Bronze Age source. In contrast, the Danish Isles and  
562 Norwegian Iron Age populations require additional East Scandinavian ancestry, suggestive of  
563 either multiple waves of migration or continuous gene flow (Figure S6.5.2.2). We used  
564 DATES<sup>67</sup> to date the admixture time between the Eastern Scandinavians and the Southern  
565 Scandinavian, using admixed populations from the Danish Isles Bronze Age, the Danish  
566 Isles Iron Age, and the Jutlandic Iron Age (Supplementary Note S6.7, Figure S6.7.1). We  
567 observed an overlap between the various target groups during the Bronze Age (~3750 - 3250  
568 BP), shortly after the first detection of Eastern Scandinavian ancestry in Scandinavia. A



569 similar result was seen for the the admixed Western Scandinavian Bronze Age cluster (4200 -  
570 3600 BP).

571

### 572 **Expansions of Scandinavian ancestry during the Migration Period**

573

574 We see these respective proportions of Southern and Eastern Scandinavian Bronze Age  
575 ancestry persist throughout the Iron Age (2800 – 1575 BP) in Jutland, the Danish Isles and  
576 Southern Sweden. In Jutland during the Iron Age, individuals tend to fall within the Southern  
577 Scandinavian cluster (Figure 6), and are modelled with ~55% Southern and ~45% Eastern  
578 Scandinavian BA (Figure 5). Further east, individuals fall within the Eastern Scandinavian  
579 cluster; on the Danish Isles individuals are modelled as ~20% Southern and ~80% Eastern  
580 Scandinavian BA and in Sweden most individuals are modelled as ~100% Eastern  
581 Scandinavian BA (Figure 5).

582

583

584

585

586

587

588

Plot of ancient genomes by Scandinavian sub-clusters

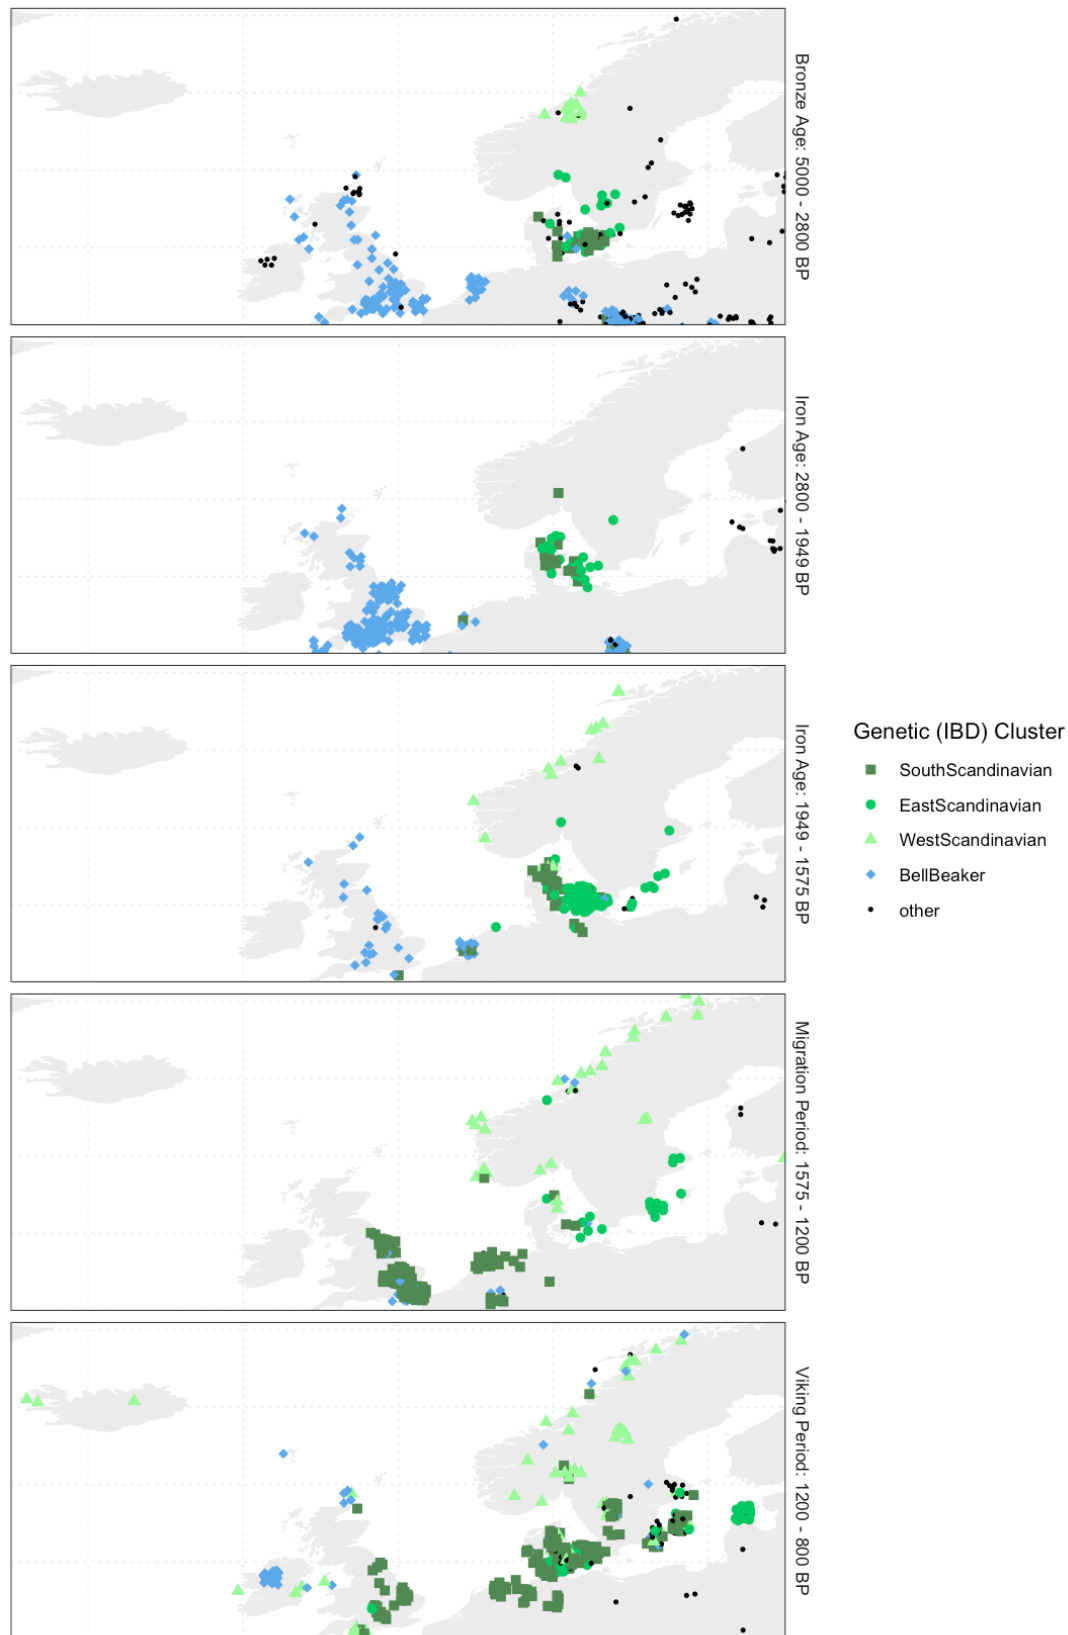

589

590

591

*Figure 6. Geographical Distribution of ancient individuals within the Western Scandinavian, Southern Scandinavian, Eastern Scandinavian and Bell Beaker subclusters through time in*

592 *Northern Europe. Note: these clusters do not represent the complexities of admixture*  
593 *between clusters (see Supplementary Note S6.4.2.) and should be interpreted together with*  
594 *Mixture Modellings results.*

595

596 The period between 2800 and 1575 BP is described in the archaeological and historical  
597 literature as the time of Germanic migrations moving south into continental Europe (ref). The  
598 lack of samples from this period, especially from Germany, limits our ability to determine  
599 when these migrations may have occurred. Despite this, we are able to see expansions have  
600 occurred at least by the end of the Iron Age and beginning of the Migration Period, when  
601 sampling density improves (Extended Data Figure 6).

602

603

604

Plot of ancient genomes by Scandinavian sub-clusters

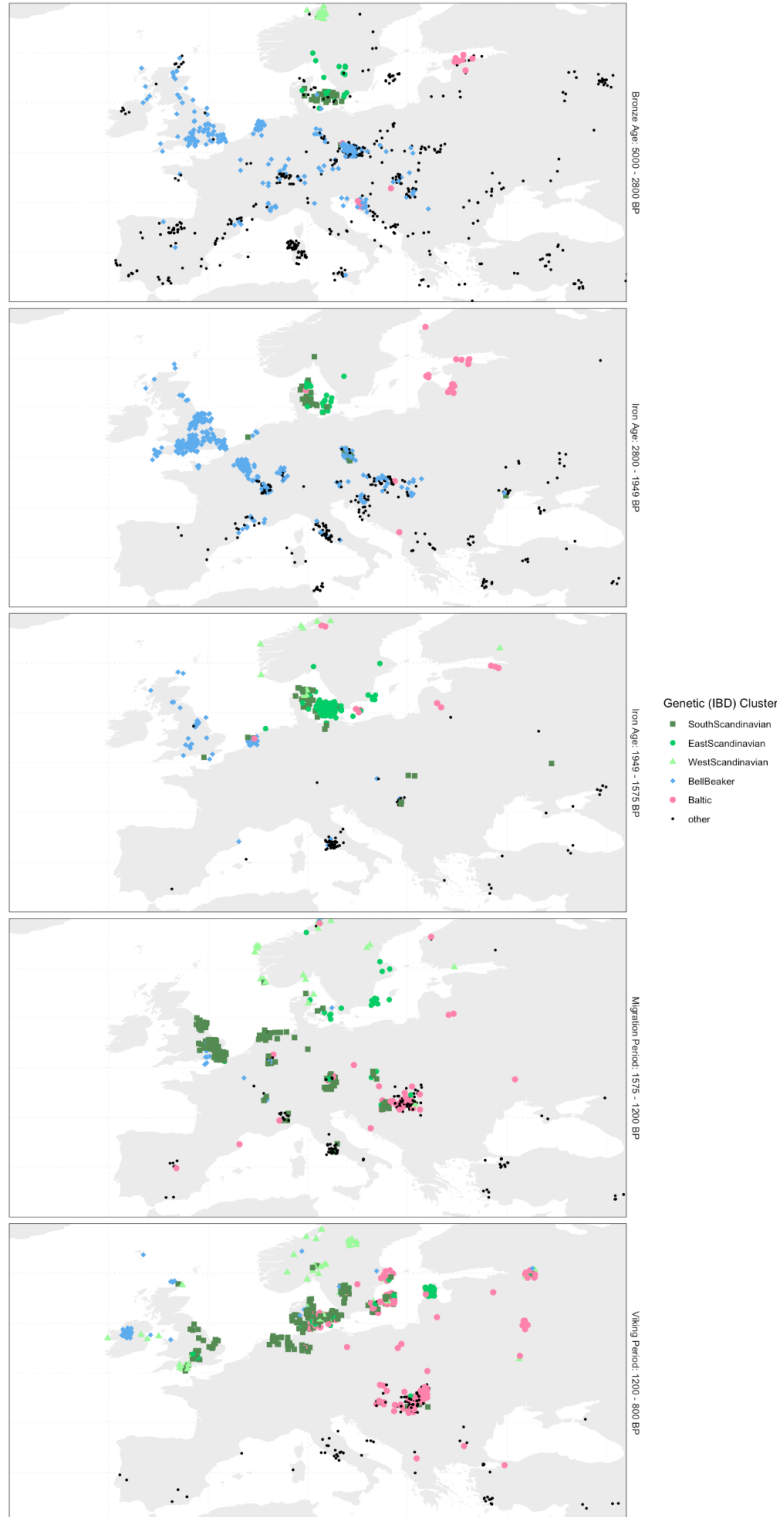

605  
606  
607  
608  
609  
610  
611

*Extended Data Figure 6. Geographical Distribution of ancient individuals within the Western Scandinavian, Southern Scandinavian, Eastern Scandinavian, Baltic and Bell Beaker subclusters through time in Northern Europe. Note: these clusters do not represent the complexities of admixture between clusters (see Supplementary Note S6.4.2.) and should be interpreted together with Mixture Modellings results.*

612 By using Iron Age sources for Western, Southern and Eastern Scandinavians (set 6, Extended  
613 Data Figure 6), we are able to ascertain more specific source populations and regions for  
614 migrations previously described more broadly to Northern Europe (Gretzinger, Langobards,  
615 Stolarek). South of the Nordic region, the Jutlandic Iron Age source to be the primary  
616 Scandinavian ancestry to the west (present day Germany, the Netherlands and England).  
617 Further east, populations of present-day Poland, Lithuania, Latvia, Estonia, Öland and  
618 Finland are primarily mixtures of Eastern Scandinavian and Baltic Bronze Age ancestries.  
619

620 The arrival of northern continental European ancestry during the Saxon period in England  
621 from a broad region ranging from the Netherlands to Southern Sweden has previously been  
622 shown<sup>47</sup>. Here we find almost all samples from England fall within the Southern  
623 Scandinavian clusters, restricting the range from the Netherlands to Jutland (Extended Data  
624 Figure 7). By adding a second Iron Age Southern Scandinavian source from Mecklenburg,  
625 Northern Germany, we are able to distinguish between the two Southern Scandinavian IA  
626 sources, allowing us to restrict this range further (Extended Data Figure 7). We find Southern  
627 Scandinavian ancestry in almost all Saxons from England, Frisians from the Netherlands and  
628 Iron Age Germans to be modelled as the Northern German source. Interestingly, the  
629 distribution of those two closely related ancestries largely resembles that of the two lineages  
630 of the dominant R1b Y-chromosome in the region (Supplemental Section 6.6.4.2). In  
631 contrast, individuals from Northern Jutland are modelled primarily as the local Southern  
632 Scandinavian IA ancestry.

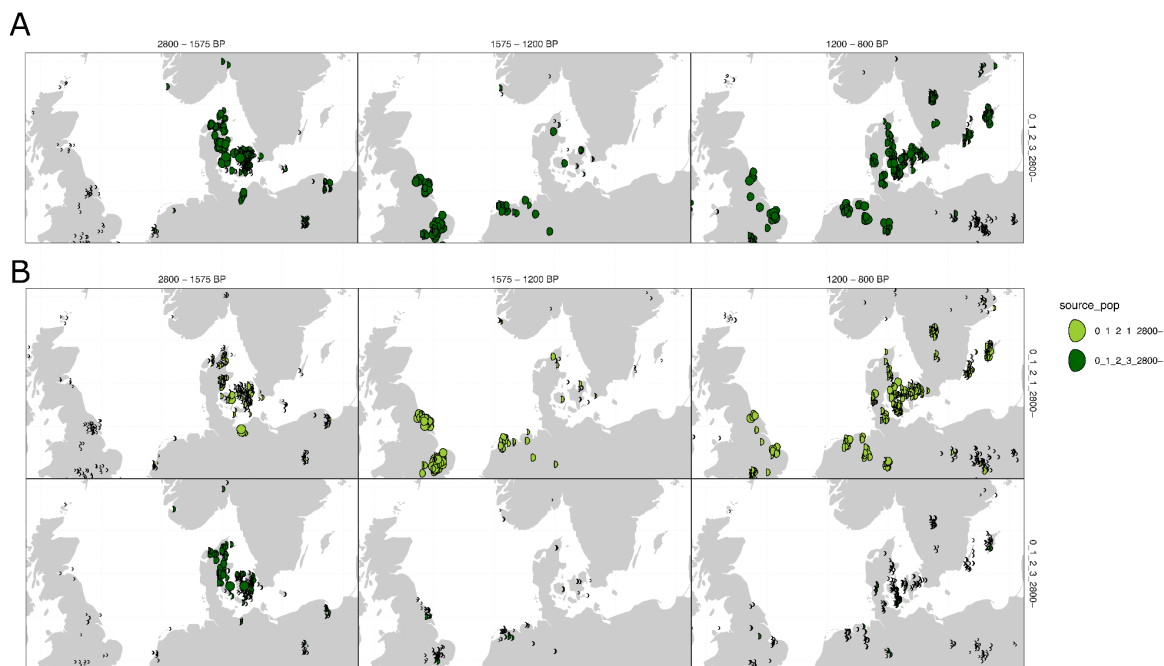

633  
634 *Extended Data Figure 7. A subset of IBD Mixture Modelling results showing the proportion*  
635 *of Southern Scandinavian IA ancestry for Northern Europe for A) Set 7, which contains a*  
636 *single Southern Scandinavian IA source (0\_1\_2\_3, Northern Jutland), in comparison to B)*  
637 *set Y, with two Southern Scandinavian IA sources (0\_1\_2\_3, Northern Jutland and 0\_1\_2\_1*  
638 *Mecklenburg (Northern Germany). The proportion of ancestry modelled is indicated by the*



639 *proportion filled and size of each circle. Full mixture modelling results for Northern Europe*  
640 *are shown in Figure S6.5.1.8 and Figure S6.5.1.8*

641

642

643

644 In Britain between 1575 and 1200 BP, we find some outliers modelled with North Jutlandic  
645 IA rather than North German IA ancestry (Extended Data Figure 8). Although bias in  
646 sampling may mean that the specific region and timing of the arrival of individuals with this  
647 profile cannot be identified, the heterogeneity present is expected due to the various  
648 homelands of the Angles, Saxons and Jutes along the Eastern North Sea coast migrating to  
649 Britain during this period. By the Viking Age, we detect Eastern Scandinavian and Western  
650 Scandinavian ancestries across Britain and its Islands, representing Viking migrations from  
651 Sweden and Norway. Although migration from Denmark is likely during this period, the  
652 close relation between the Anglo-Saxons and the Danish Vikings limits our ability to detect  
653 this migration.

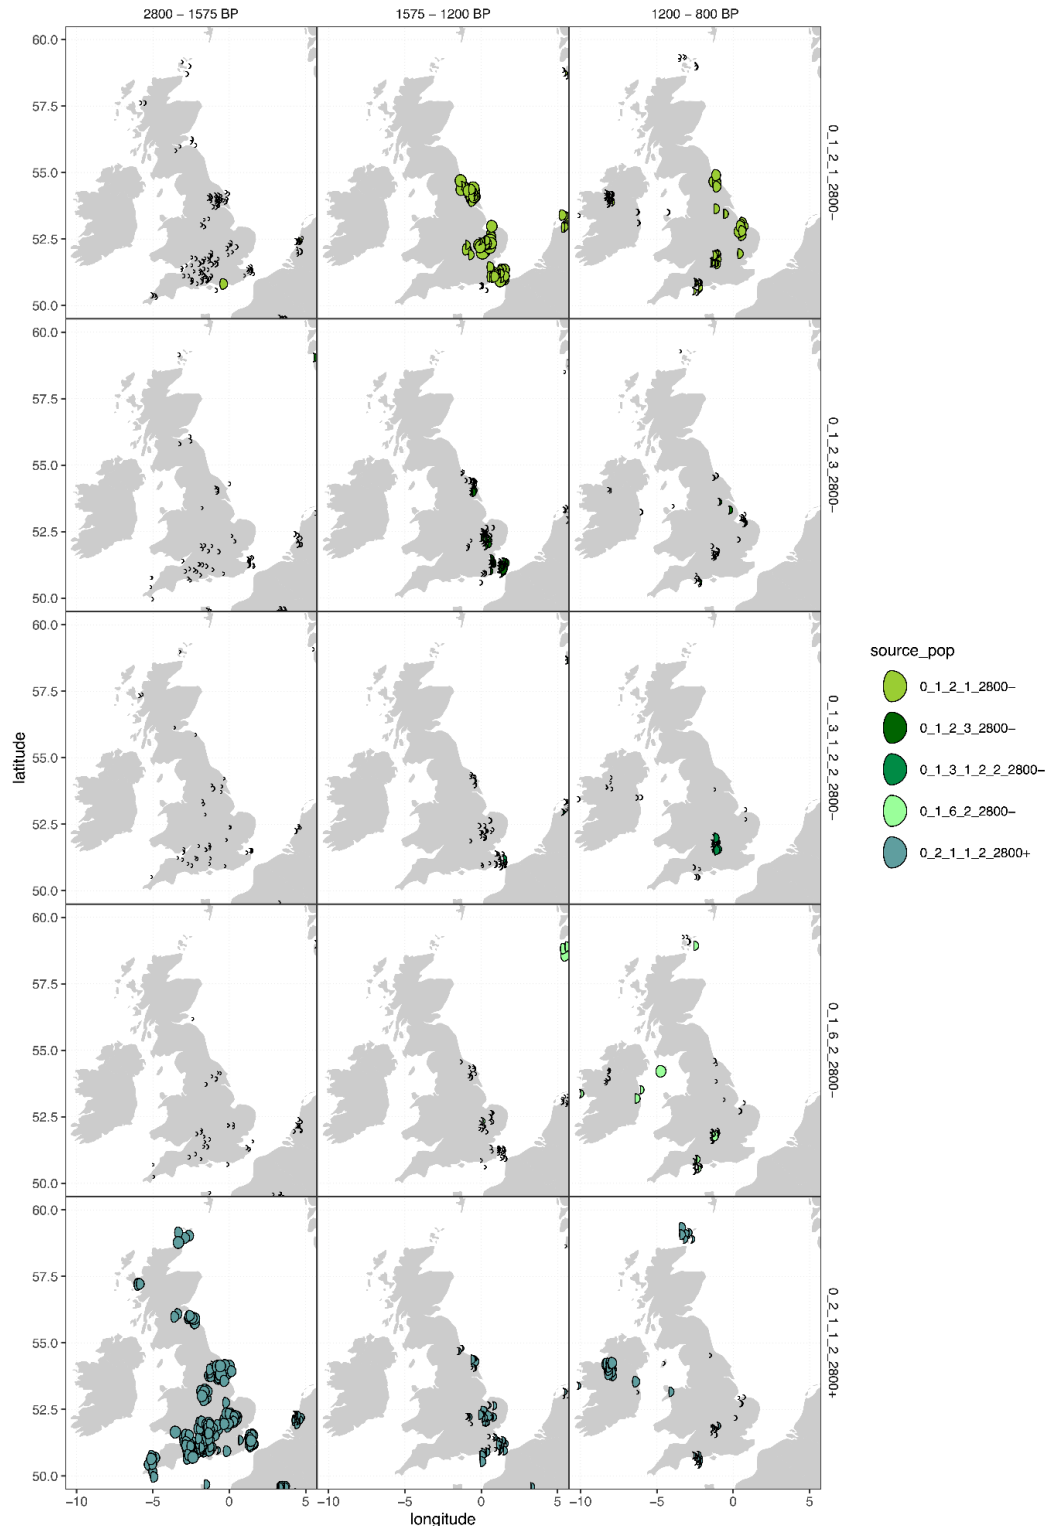

654

655 *Extended Data Figure 8. A subset of IBD Mixture Modelling results showing the proportion*  
656 *of ancestry for set X. In column 1 (2800 - 1575 BP), the dominant ancestry modelled is*  
657 *0\_2\_1\_1\_2 Celtic Bronze Age. In column 2 (1575 - 1200 BP) during the Anglo Saxon period,*  
658 *a transition causing individuals to be modelled primarily as 0\_1\_2\_1 Southern Scandinavian*  
659 *IA (Mecklenburg, Northern Germany) has occurred, with small proportions of 0\_1\_2\_3*  
660 *Southern Scandinavian IA (Northern Jutland, Denmark). In column 3 (1200 - 800 BP), the*

661 *appearance of other Scandinavian ancestries (cluster 0\_1\_3\_2\_2\_2 Eastern Scandinavian IA*  
662 *(Sweden) and cluster 0\_1\_6\_2 Western Scandinavian IA (Norway)) is apparent during the*  
663 *Viking Period.*

664

665 Similarly, we find another West Germanic speaking population, the Langobards from the  
666 Czech Republic, Hungary, and Italy to be modelled as primarily Southern Scandinavian IA  
667 (Figure S6.9.6.1), and, accordingly, to carry a few Y haplogroups lineages restricted to  
668 Scandinavia. In contrast, we find the (supposed East Germanic-speaking) Polish Wielbark  
669 individuals, to be modelled primarily as Eastern Scandinavian. However, most later  
670 individuals associated with the originally East Germanic-speaking groups, the Ukrainian  
671 Ostrogoths and the Visigoths of Iberia, appear to be locals (Supplementary Note 6.9.6). Two  
672 exceptions are from Goths from Iberia, who genetically fall on the Northeast-Southeast Baltic  
673 cline (one of which carries a Northern European Y haplogroups), suggesting an origin in  
674 North East Europe, but not Eastern Scandinavia specifically. This cline includes populations  
675 related to the spread of Slavic populations in Poland, Hungary and the Czech Republic and  
676 are to be related to the Baltic Bronze Age ancestry originating in North East Europe  
677 (Supplementary Note 6.9.7). With the current sampling, determining a more precise  
678 homeland of the Slavic migrations is not yet possible.

679

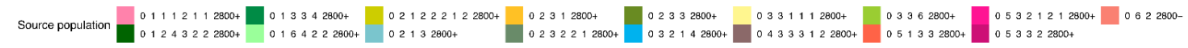

Denmark + Sweden  
2500 - 1575 BP

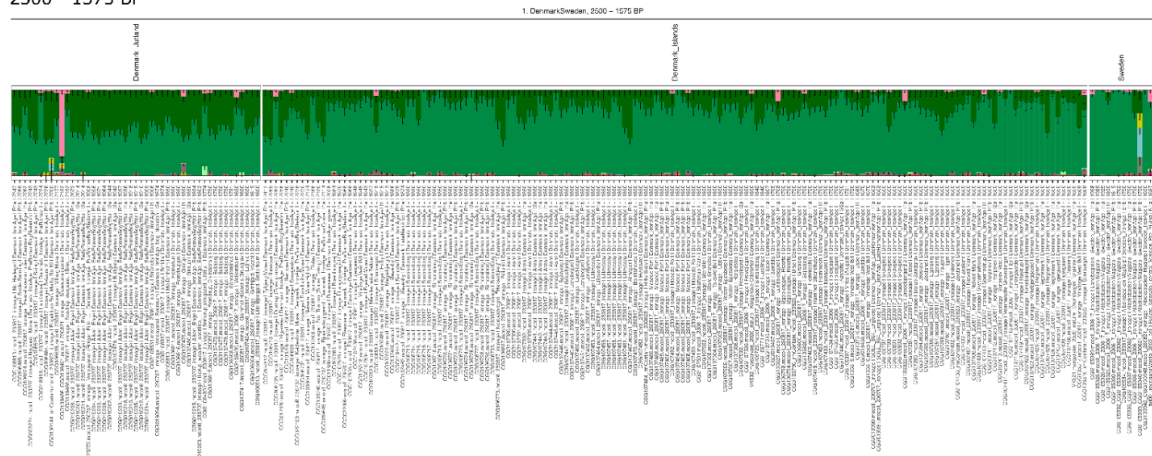

Denmark + Sweden  
1575 - 1200 BP

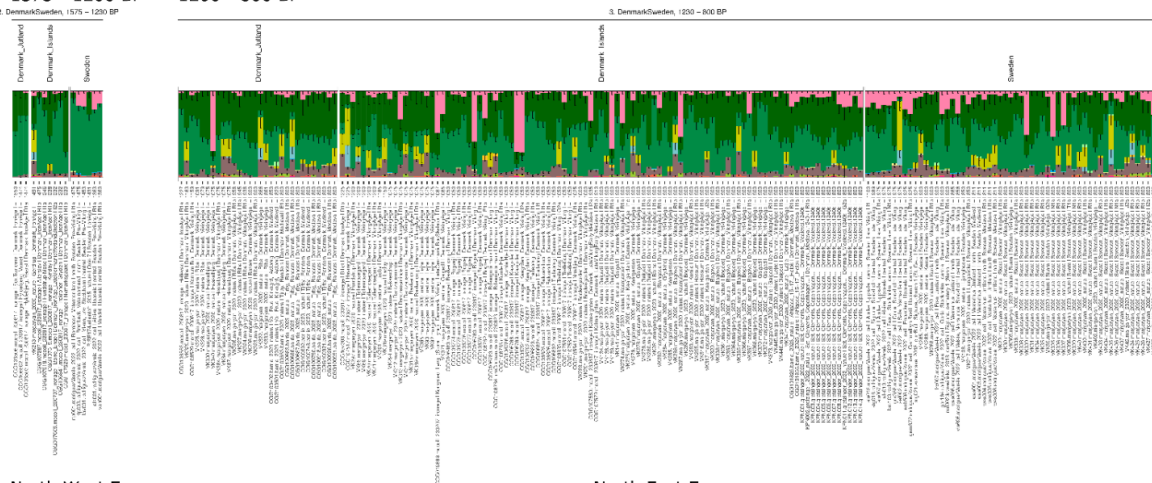

North West Europe  
1700 - 1400 BP

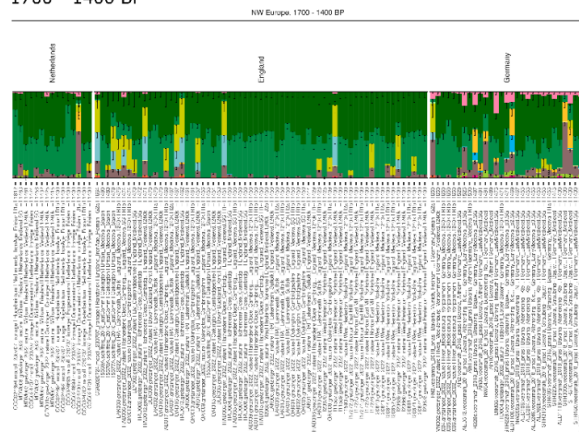

North East Europe  
2500 - 1000 BP

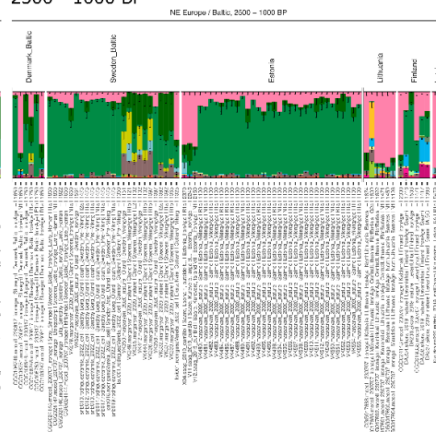

680  
681  
682  
683  
684

Extended Data Figure 9. A subset of IBD Mixture Modelling results for Bronze Age sources. Row 1 shows the decreasing proportion of Southern Scandinavian ancestry from

685 Denmark\_Jutland to the Islands of Denmark, to Southern Sweden. Row two shows Denmark  
686 and Sweden during the Migration Period (1575 - 1200 BP, left) and the Viking Period (1200 -  
687 800 BP, right). Row three shows the surrounding regions to the west (left) and east (right).  
688  
689



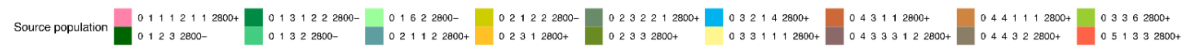

Denmark + Sweden  
2500 - 1575 BP

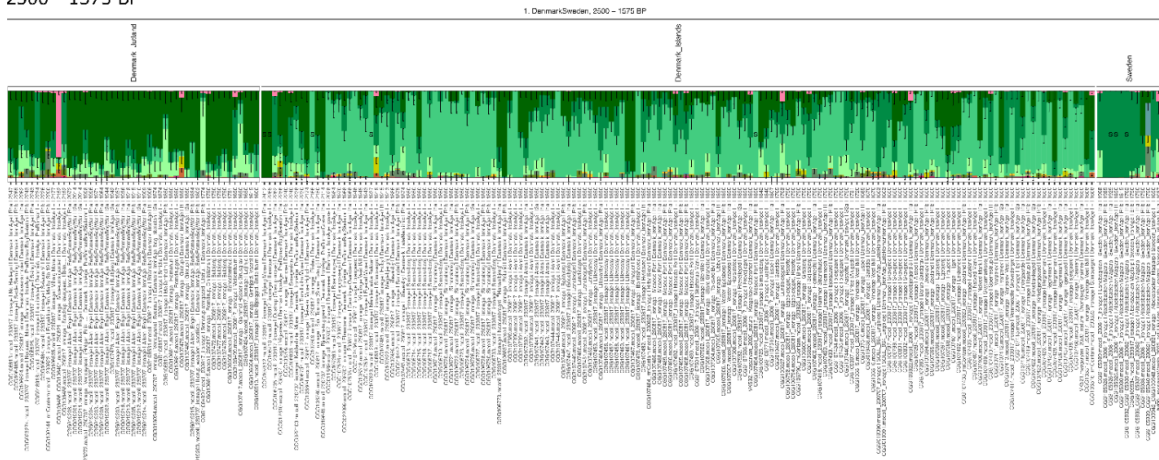

Denmark + Sweden  
1575 - 1200 BP      1200 - 800 BP

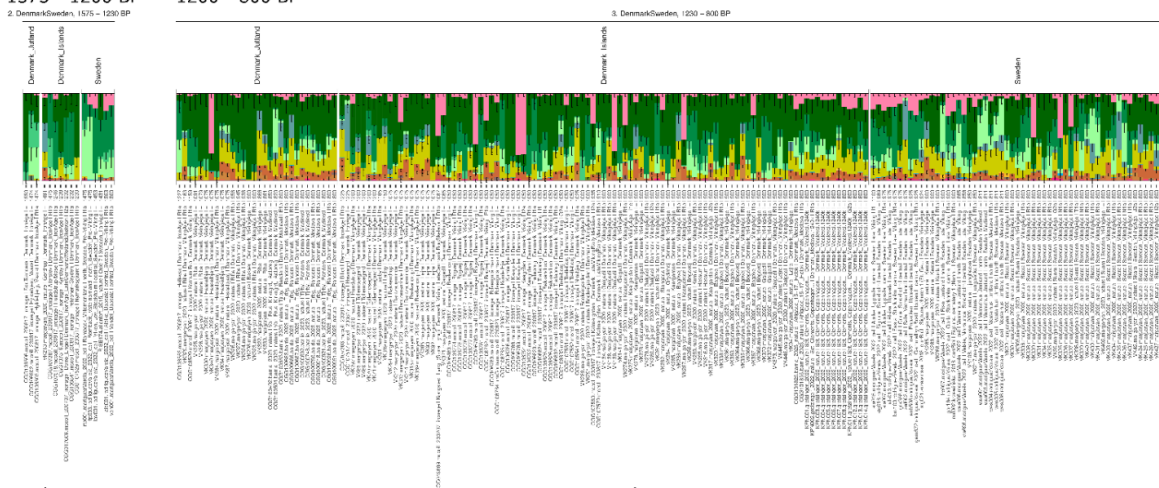

North West Europe  
1700 - 1400 BP

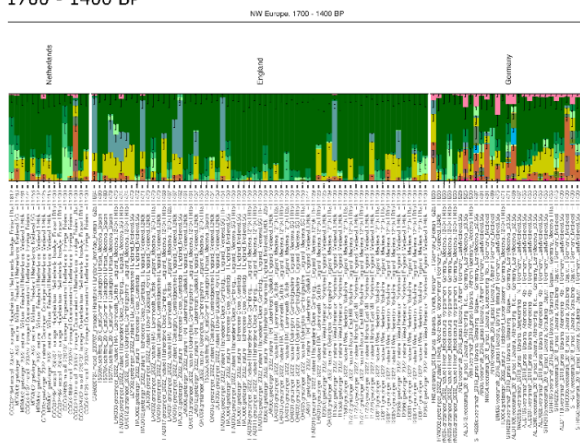

North East Europe  
2500 - 1000 BP

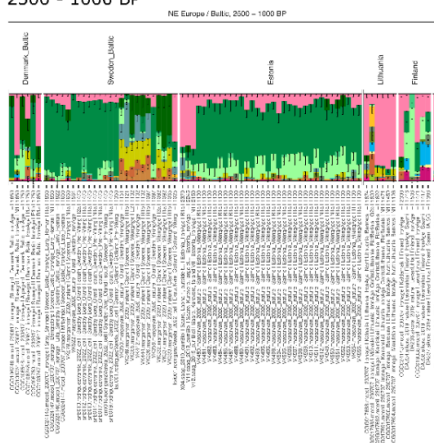

690

691

692

693

Extended Data Figure 10. A subset of IBD Mixture Modelling results for Iron Age sources. Row 1 shows variation from Denmark\_Jutland to the Islands of Denmark, to Southern Sweden. Row two shows Denmark and Sweden during the Migration Period (1575 - 1200

694 BP, left) and the Viking Period (1200 - 800 BP, right). Row three shows the surrounding  
 695 regions to the west (left) and east (right).

696  
 697

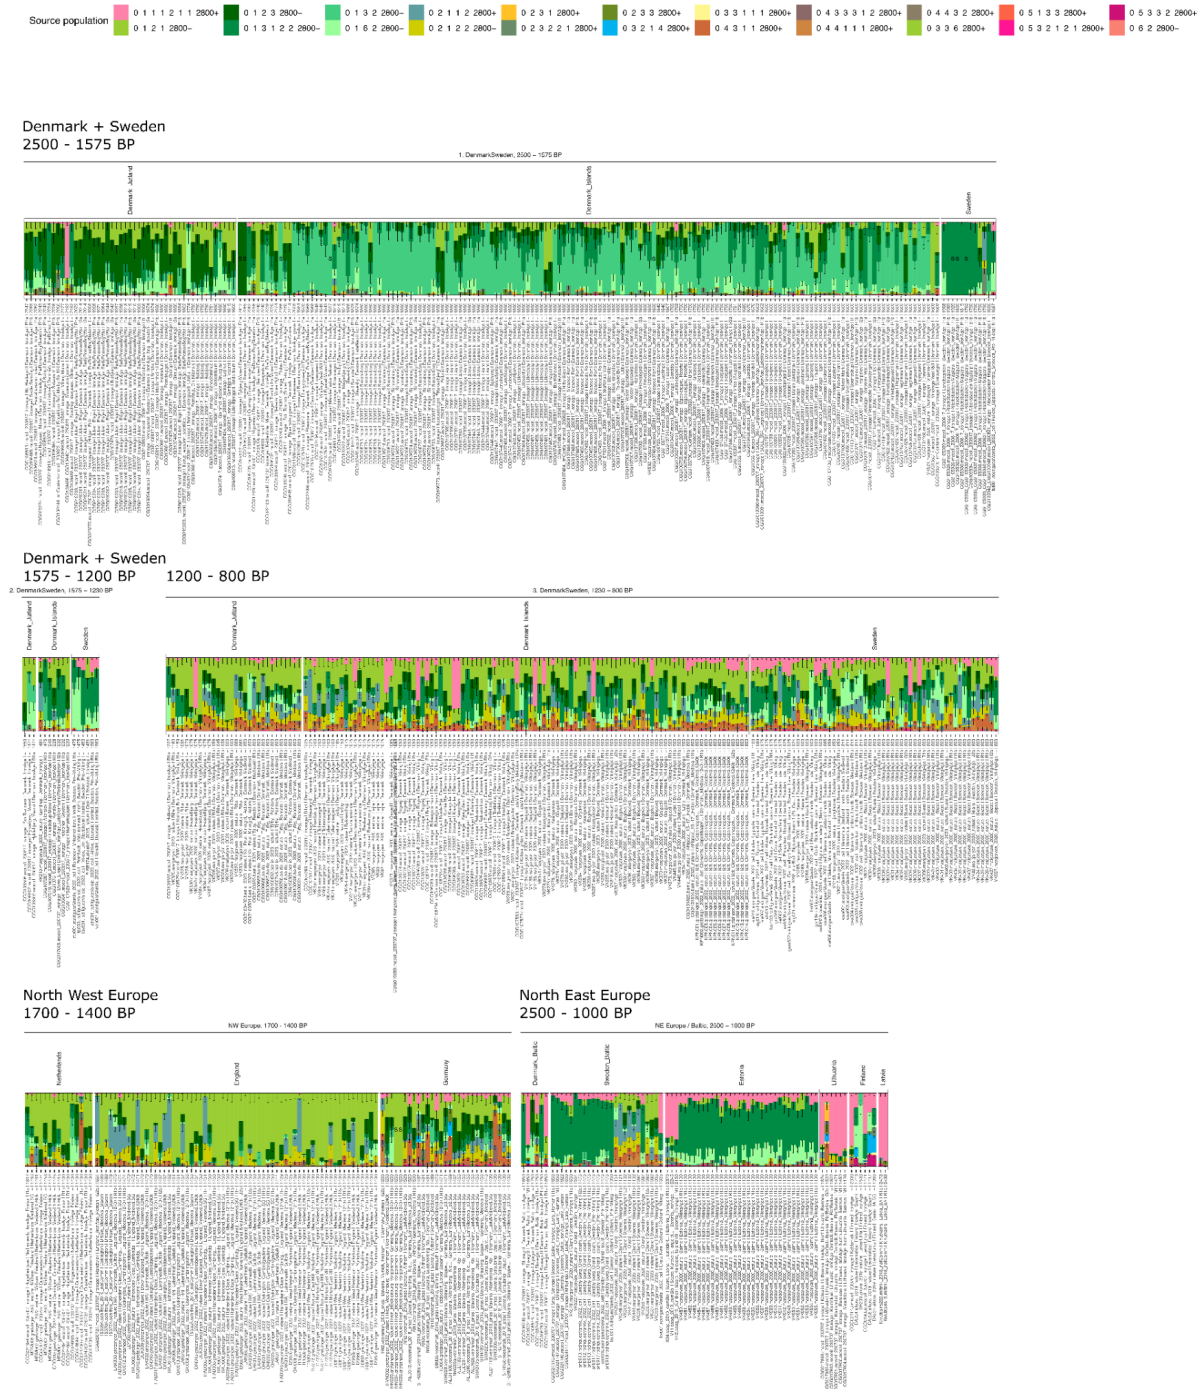

698  
 699 Extended Data Figure 11. A subset of IBD Mixture Modelling results for Iron Age sources,  
 700 when including two Southern Scandinavian Iron Age sources. Row 1 shows variation from  
 701 Denmark\_Jutland to the Islands of Denmark, to Southern Sweden. Row two shows Denmark  
 702 and Sweden during the Migration Period (1575 - 1200 BP, left) and the Viking Period (1200 -  
 703 800 BP, right). Row three shows the surrounding regions to the west (left) and east (right).

704

705

706

707

708

709 On the Danish Isles we see discontinuity from around 1600 BP (Extended Data Figure 6).  
710 Between 1600 BP and 1230 BP the limited number of samples limits our ability to  
711 genetically determine the precise timing and nature of this transition. Sampling density  
712 improves from 1230 BP, in the 100 years leading up to the Viking Age, by which point we  
713 see a distinct transition has occurred. This transition is visible at a variety of resolutions.  
714 From the Bronze Age modelling, we see an increase in the proportion of Southern  
715 Scandinavian ancestry on Zealand by 1230 BP (Extended Data Figure 9). In the Iron Age  
716 (2000 – 1575 BP), the only regions with high proportions of Southern Scandinavian ancestry  
717 are Jutland and Germany. In Northern Jutland, the proportion of Southern Scandinavian  
718 ancestry remains relatively constant. In both regions, by the Viking Age, many individuals  
719 carry a series of ancestries previously only found further south and west – ENS Bronze Age,  
720 Bell Beaker/Celtic Bronze Age and European Farmer.

721

722 By including the two Iron Age Southern Scandinavian clusters in the sources (Jutland and  
723 Mecklenburg) together with two Iron Age Eastern Scandinavian clusters (Danish Isles and  
724 Sweden), we are able to further disentangle these migrations (Extended Data Figure 11). The  
725 Danish Isles ancestry that was widespread on Zealand from 2200 BP disappears from ~1600  
726 BP. For the few samples between 1600 BP and 1230 BP we find instead a variety of  
727 ancestries, Swedish Iron Age, Celtic Iron Age, Norwegian Iron Age, and Jutlandic (check)  
728 Iron Age. In Northern Jutland, this additional resolution reveals a transition within the  
729 constant proportion Bronze Age Southern Scandinavian ancestry. Prior to 1600 BP it is  
730 modelled as North Jutlandic IA ancestry, which gradually shifts to become primarily  
731 modelled as North German IA ancestry. Small proportions of Jutlandic IA ancestry are  
732 modelled in many later individuals, which is in direct contrast to Zealand, where it appears a  
733 population replacement occurred.

734

735 From 1230 BP until 800 BP, including the Viking Age, we see most individuals modelled  
736 primarily with small proportions of ancestries that prior to 1575 BP were only found south of  
737 Scandinavia: ENS ancestry of the East North Sea coast, Northern German ancestry from  
738 Mecklenburg and Celtic ancestry of the Britain and Ireland and France, and European  
739 Farming ancestry found in western Europe (Extended Data Figures 9 - 11). On Zealand and  
740 the Baltic Islands we also detect a number of individuals with Baltic (Estonian Bronze Age)  
741 ancestry, similar to populations associated with the Slavic-related populations. In addition to  
742 these non-local ancestries, many of these individuals are modelled with small proportions of  
743 East, West and South Scandinavian ancestry primarily found within Scandinavia during the  
744 Iron Age. Although in Northern Jutland, we have evidence of admixture between the local  
745 Iron Age population and the incoming Migration Period population, suggesting that  
746 admixture at this time occurred within Scandinavia. However, we cannot exclude the  
747 possibility of admixture between the more southern sources and the Scandinavian IA sources  
748 occurring in the unsampled regions of Southern Jutland or continental Europe.



749

750 The dense sampling and high resolution demographic inference have allowed us to establish a  
751 baseline ancestry for various regions, and subsequently identify outliers (Supplementary Note  
752 S6.8.1).

753

## 754 **Discussion**

755 The Germanic Indo-European language group is frequently assumed to have been introduced  
756 by the first major Steppe cultures to arrive in Scandinavia. The Corded Ware culture,  
757 appearing around 4800 BP, is generally seen as a likely context<sup>3-6</sup>, the local Jutlandic Single  
758 Grave culture often taking a central role<sup>16,68,69</sup>. A comparable model sees the appearance of  
759 the Bell Beaker culture to Jutland and Norway around 4400 BP as the moment when this  
760 language group was introduced<sup>7</sup>. In contrast with these older hypotheses, an East  
761 Scandinavian population, which is not detected for another 400-800 years, is revealed here as  
762 an alternative vector for the introduction of Germanic, allowing for the proposition of a  
763 revised model. Although all Early Bronze Age populations of Scandinavia derive their Steppe  
764 ancestry from people of Corded Ware culture, the earliest Scandinavian individuals carry  
765 small proportions of local Western Hunter-Gatherer ancestry, whereas the later Eastern  
766 Scandinavians are modelled with Lithuanian/Latvian Hunter-Gatherer ancestry (Extended  
767 Data Figure 3, Figure S6.5.1.4, Supplementary Note S6.5.1), indicative of a Late Neolithic  
768 cross-Baltic migration into Scandinavia. No such migration has to our knowledge been  
769 identified in the archaeological record. However, the timing coincides with the introduction  
770 of a new, Late Neolithic sheep breed to Scandinavia<sup>70</sup>. It also coincides with the spread of a  
771 new burial rite of gallery graves in south Sweden, the Danish islands<sup>71</sup> and Norway<sup>72</sup>, a new  
772 house type<sup>70,73,74</sup>, the first durative bronze networks<sup>75</sup>, as well as with the end of an east-  
773 west divide in Scandinavia between 4050 and 3650 BP<sup>73</sup>.

774

775 Archaeologically, the Nordic Bronze Age is a period of strong cultural homogenisation in  
776 south Scandinavia, starting around 3500 BP, creating the so-called Nordic Cultural Zone that  
777 lasted until 2500 BP. It was accompanied by widespread mobility not least in relation to  
778 forging new alliances supporting metal distribution<sup>76</sup>. Although it is possible additional  
779 migratory events occurred, our results based on IBD Mixture Modelling (Supplementary  
780 Note admixed source) and DATES analyses (Supplementary Note S6.7) suggest that  
781 admixture between Bronze Age Southern and Eastern Scandinavians likely occurred in  
782 Jutland and the Danish Isles during the Nordic Bronze Age, between 3700 - 3400 BP, and  
783 leading to the formation of the Iron Age Southern Scandinavians (Supplementary Note  
784 S6.5.1). The formation of the admixed Late Bronze Age Western Scandinavians as Bronze  
785 Age Western and Eastern Scandinavian similarly occurred in the overlapping time period of  
786 4200 - 3600 BP (Figure S6.7.1), however by the Iron Age however, Norwegian individuals  
787 carry additional East Scandinavian ancestry. Linguistically, the Late Bronze Age is the period  
788 during which Palaeo-Germanic donated vocabulary to Finno-Saamic in the east and adopted  
789 vocabulary from Celtic in the south, suggesting that it was spoken widely among East  
790 Scandinavians distributed between Sweden and Denmark, and possibly also in the Nordic  
791 Bronze Age communities in Finland and Estonia<sup>77,78</sup>.

792

793 The transition from Palaeo- to Proto-Germanic is traditionally characterised by defining  
794 phonological changes known as the Germanic sound shifts and took place around the start of  
795 the Iron Age (~2600 BP)<sup>8,79</sup>. This defining event has been speculated to result from the  
796 assimilation of a different, unknown language<sup>79</sup>. Our results reveal no major admixture  
797 events around this period, suggesting that this linguistic phase shift was rather induced by  
798 other factors, such as changes in mobility patterns or social hierarchies towards the onset of  
799 the Iron Age, or by language-internal developments. At any rate, the persistent genetic border  
800 between Southern and Eastern Scandinavians throughout the Iron Age suggested that the  
801 Proto-Germanic speech community united these different populations until its dissolution  
802 around 2000 BP.

803  
804 We further find that the IA Southern Scandinavians that arose from admixture between  
805 Bronze Age Southern and Eastern Scandinavians are central to understanding the Germanic  
806 dispersal. After the Pre-Roman Iron Age, around 2000 BP, Proto-Germanic diverged into  
807 North, East and West Germanic. The spread of West Germanic to Germany, the Netherlands  
808 and Britain, appears to be closely related to populations migrating from the Jutland Peninsula.  
809 In these regions, we see the transition from Bell Beaker-related to the Corded Ware-related  
810 Southern Scandinavian ancestry. For Germany and Britain, where Celtic was known to be  
811 spoken, this period also saw a linguistic transition to Germanic. In the Netherlands, IA  
812 Southern Scandinavians' ancestry became dominant in the place of a distinct Eastern North  
813 Sea population. The linguistic affiliation of this population is unknown. According to the  
814 linguistic 'Nordwestblock' hypothesis, the Netherlands may have harboured a language  
815 distinct from both Celtic and Germanic<sup>80</sup>. Given that ENS is a Bell Beaker subcluster, which  
816 is associated with Celtic languages in Britain and France, our results can alternatively be  
817 brought in line with theories of Celtic speakers, perhaps including the *Frisii* of the Roman  
818 Period, inhabiting the Dutch North Sea coast during the Early Iron Age<sup>81</sup>. Although no  
819 unadmixed ENS populations are found during the migration period, the incoming Southern  
820 Scandinavians carry small proportions of ENS ancestry, indicating the migrations were not a  
821 complete replacement. Dutch coastal areas see a habitation hiatus around 1600 BP and  
822 subsequent appearance of a new material culture that is often referred to as Anglo-Saxon in  
823 nature<sup>82</sup>, mirroring the genetics and timing of the Late Iron Age, linguistically West-  
824 Germanic Frisians in this dataset. In addition, we find that the Southern Scandinavian  
825 ancestry of these migrating populations is better modelled by individuals near Southern rather  
826 than the Northern Jutland, and that the migrating populations often carry varying but minor  
827 proportions of ENS ancestry, inherited from the earlier people who previously lived in the  
828 region. In contrast to previous studies, which relied on Scandinavian samples postdating the  
829 Migration Period<sup>47</sup>, we can now reject the Danish Isles and Sweden as a source area for the  
830 Anglo-Saxons in Britain, as these were dominated by Eastern Scandinavian ancestry prior to  
831 the Viking Age (Figure 6).

832  
833 While previous studies have identified the presence of some northern European ancestry in  
834 Migration Period populations with historically documented ancestral myths about origins in  
835 northern Europe<sup>45,48,83</sup>, they have not had the resolution to identify a source region with the  
836 resolution presented here. Here we show that the Scandinavian ancestry in most of the

837 Langobards is from Southern Scandinavia, consistent with post-classical origin legends <sup>84</sup>.  
838 However, three outlier Langobards from the Czech Republic and Hungary are of Eastern  
839 Scandinavian origin. The earliest individuals from Wielbark, Poland (~1900 BP) are  
840 primarily of Eastern Scandinavian ancestry, supporting a population migration from a region  
841 and population distinct from that of the West and North Germanic populations, a scenario  
842 potentially consistent with Gothic oral history. Further south, the later Ostrogoth and Visigoth  
843 individuals (1600 - 1100 BP) who were cultural descendents of the earlier Goths, appear  
844 similar to local Southern Europeans. The two outliers from Spain have around 50% northern  
845 European ancestry, but unlike the earlier Wielbark individuals, they fall along the Northeast-  
846 Southeast Baltic cline. The genetic distinction of the Ostrogoth and Visigoth populations  
847 from the Eastern Scandinavian Wielbark Goths suggests an adoption of the culture and East  
848 Germanic language by the more southern groups.

849  
850 The subsequent period (1600 - 1200 BP) was one of great turbulence, including the collapse  
851 of the Western Roman Empire, the Barbarian migrations, the Justinian plague and the Late  
852 Antique Little Ice Age resulting from volcanic eruptions (Figure 7). In the archaeological and  
853 historical literature this is considered a period of genetic continuity in Scandinavia despite a  
854 reduction in population size (Supplementary Note S7.3, S7.4), however the genetic record  
855 now negates this assumption of pervasive genetic continuity from the Iron Age on the Danish  
856 Isles, Northern Jutland and Southern Sweden. Due to the scarcity of genomes from this  
857 period we rely on other lines of evidence to provide information on the homeland and timing  
858 of this migration.

859  
860 The population in southern Scandinavia after 1200 BP shows hitherto unknown changes  
861 compared with the situation in the same areas before 1600 BP. Our results demonstrate the  
862 arrival of a strong component of North German IA ancestry, in combination with a series of  
863 ancestries previously associated with Celtic-speaking groups and populations carrying  
864 European Farmer (in addition to GAC) ancestry from north-western Europe. In the Danish  
865 islands, the shift amounts to a virtually complete population replacement. Subsequently these  
866 changes are supplemented by a modest arrival of eastern ancestry associated with Slavic  
867 populations, who migrated into areas south of the Baltic Sea formerly settled by East  
868 Germanic speakers, and noted as a component in Scandinavian samples after 1200 BP.

869  
870 In the period directly following the volcanic activity (1414 and 1411 BP) and the Justinian  
871 Plague (1409 BP), Scandinavia saw a population decline that did not fully recover until  
872 around 1300 BP (Supplementary Note S7) <sup>85</sup>. Linguistically, this period is one of central  
873 importance to Northern Europe. Runic inscriptions from across Scandinavia testify to a North  
874 Germanic language that remained relatively similar to Proto-Germanic during 2000 - 1500  
875 BP. However, during the Migration period (1575 - 1200 BP) the language underwent far-  
876 reaching changes resulting in the formation of Old Norse <sup>54</sup>. The glottogenesis of Old Norse  
877 thus coincides with a period of social and demographic instability <sup>86</sup>. Following this  
878 transition, the originally common Germanic script known as the Elder Futhark was likewise  
879 fundamentally remodelled, giving rise to the Younger Futhark that was tailored specifically  
880 to Old Norse <sup>87,88</sup>, and was taken into use all across Scandinavia.



881

882 Old Norse, spoken across a vast area, including Norway, Iceland and Sweden, was by its  
883 speakers referred to as *dǫnsk tunga*, i.e. the Danish tongue<sup>89,90</sup>. Across Scandinavia, we see  
884 variation in how the populations associated with this language were established. In Denmark  
885 and Sweden we show strong genetic evidence suggesting that observed archaeological and  
886 linguistic changes are linked to the migration of Iron Age Danes. Based on the genetic  
887 heterogeneity of the migrating population and the inability to identify a suitable source  
888 population, it appears that between 1500 and 1200 BP was likely the outcome of an  
889 amalgamation among several migrating and local groups, comparable to the formation  
890 processes among Germanic groups on the continent. In contrast, in Norway, the adoption of  
891 Old Norse and similar social changes as seen in South Scandinavia occurred with limited  
892 genetic impact from Southern Scandinavian and must have been more cultural in nature. With  
893 the exception of a single early Viking sample, the majority of Viking Age Norwegians appear  
894 either to carry local ancestry, or to reflect back migrations from Celtic regions of Britain and  
895 Ireland. Of note, the border between the East and West Norse languages closely corresponds  
896 closely to that of the Southern Scandinavians and Western Scandinavians clusters during the  
897 Viking Period (Figure 6).

898 Combined with linguistic, historical and archaeological evidence, our findings have  
899 implications for the prehistory of the Danes. Antique sources mention the Danes living in  
900 South Scandinavia by 1450 BP<sup>91,92</sup>. According to oral histories, the South Scandinavian  
901 royal lineage of the Danes, as well as those of the Swedes and the Norwegians were initiated  
902 between 1550-1500 BP<sup>93</sup> and continued throughout the subsequent periods. The appearance  
903 of the Danes appears to coincide with prominent cultural changes. By the late Migration  
904 Period (1475 - 1400 BP) a new group of large princely halls was introduced in a number of  
905 sites, many of which continued in use until the end of the Viking Age<sup>93-96</sup>. 1550 - 1450 BP  
906 saw the development and spread of Germanic animal art, an expression form that was closely  
907 tied with religious concepts, and continued to develop until the conversion to Christianity  
908 around 1000 BP<sup>37,97,98</sup>. Finally, we see possible evidence of a political shift in the  
909 construction of the Dannevirke in Southern Jutland, a south facing moat and rampart earth  
910 stretching more than 5 km across the peninsular near Slesvig, whose second phase dates to  
911 around 1500 BP<sup>99</sup>.

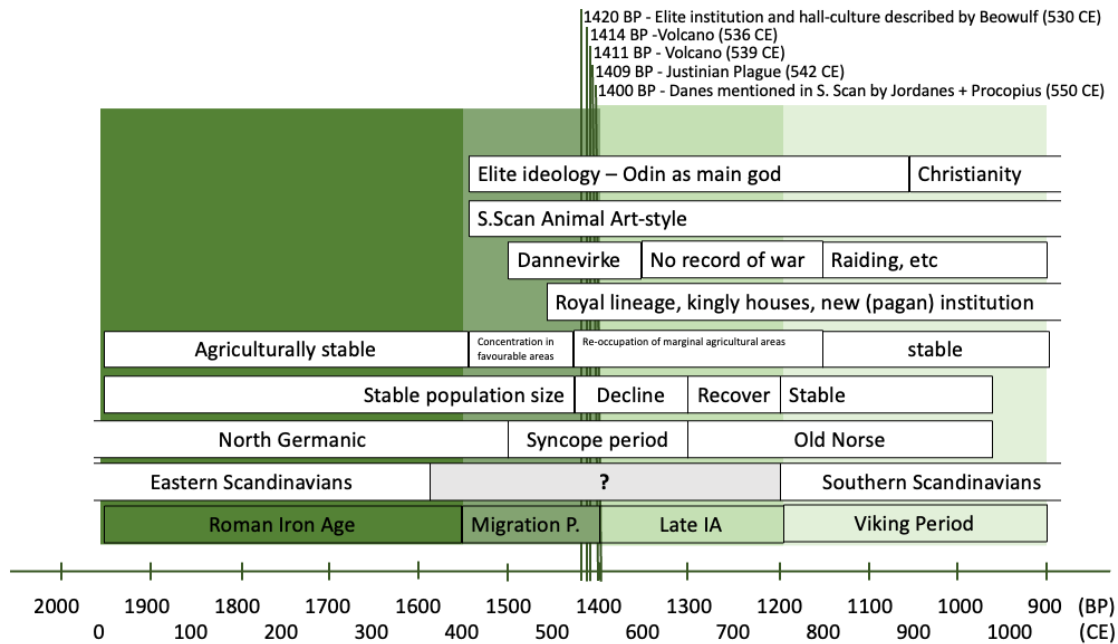

912

913

914 *Figure 7. Timeline showing the climatic, cultural, linguistic and genetic shifts in the Danish*  
 915 *Isles and Southern Sweden occurring from the Migration Period to the Viking Age.*

916

917 Thus, the period between 1550 - 1400 BP in Scandinavia covers a number of potentially  
 918 major population dynamics. The migrations and plague might have caused abandonment of  
 919 marginal subsistence areas<sup>55</sup>. During the Little Antique Ice Age, although depopulation in  
 920 marginal areas occurred<sup>100</sup>, there was continuity to some degree in more fertile and southern  
 921 areas<sup>101</sup> also related to intensified food production<sup>102</sup>. This is shown in the pollen data from  
 922 southernmost Sweden, where woodland regeneration occurs in uplands, with continuity of  
 923 agricultural production in the most favourable areas (Supplementary Note S7.4). Further  
 924 north, variation between different climatic zones is noted in southern Norway, with different  
 925 societal impact from place to place which does not directly correspond with the climatic data  
 926<sup>55</sup>. For those who survived, the subsequent improving conditions and relative abundance of  
 927 resources due to a lower population size would have created the opportunity for rapid  
 928 expansion, as attested to in historical sources in other areas.

929

930 On the present archaeological and historical evidence, we may thus conclude that the major  
 931 population shift in South Scandinavia between the Roman and the Viking periods was not  
 932 solely driven by the climate events or plague of 1450 - 1350 BP but instead likely took hold  
 933 between 1550 and 1450 BP and was associated with the establishment and subsequent  
 934 expansion of what became the Danes.

935

936 The major findings from ancient DNA studies over the last 10 years have primarily  
 937 concerned large scale transitions of genetically distinct populations detected with a relatively  
 938 small number of genomes. Here we show how the complexities of demographic events  
 939 between closely related populations can now be exposed through dense sampling through

940 space and time and the application of improved methodologies. Our findings have important  
941 implications for the interpretation of the archaeological record after the Middle Neolithic.  
942 They additionally allow us to offer a number of revisions to the formation of West Eurasian  
943 ancestry as well as the proposition of a new model for the origin and spread of the Germanic  
944 languages. However, the present study also has limitations and raises several new questions.

945  
946 With the resolution now shown to be possible here, additional sampling from a series of  
947 regions will allow a series of questions to be addressed that are currently not possible with the  
948 current dataset. Of particular interest is 1) confirming the proposed Bronze Age source of the  
949 East Scandinavians along the Baltic coast, 2) identifying the Iron Age border between the  
950 East and South Scandinavian IA in continental Europe between Mecklenburg and Gdansk  
951 representing the border between East and North West Germanic, 3) determining the more  
952 localised regions both along the East North Sea coast and within Britain representing each of  
953 the Angles, Saxons and Jutes, and 4) the regions in North East Europe related to source of  
954 Baltic and Slavic populations.

955  
956 Our results additionally call for a reappraisal of the linguistic evidence concerning the  
957 hypothetical migration of Germanic from the Baltic into Scandinavia and its trajectory of this  
958 linguistic subgroup from the Indo-European steppe. The formation of East Scandinavians out  
959 of Baltic populations finds an evident linguistic analogue in the isoglosses shared between the  
960 Germanic and Balto-Slavic branches of the Indo-European language family, which point to  
961 prehistoric borrowing, a linguistic subclade, or both <sup>103</sup>. On the other hand, the relatively late,  
962 Bronze Age arrival of agriculture in the Baltic <sup>104,105</sup> vs the presence in Proto-Germanic of  
963 agricultural terms inherited from Indo-European <sup>106</sup> raises a question on the suitability of the  
964 archaeological context of this area as a linguistic stepping stone during the Late Neolithic.

965  
966 Finally, this study highlights fundamental methodological difficulties in establishing  
967 correlations – or lack thereof – between genetic, archaeological and linguistic evidence <sup>107,108</sup>.  
968 For instance, the immigration of East Scandinavians, central to our new model, has so far not  
969 been recognized in the archaeological record. During the Late Iron Age, Northwest Germanic  
970 was spoken by both Southern, Eastern and Northern Scandinavians, as demonstrated by runic  
971 inscriptions from across Scandinavia, despite persistent genetic boundaries between these  
972 populations. Following the Migration Period, southern European individuals exhibit late  
973 Germanic burial identities without showing ancestry from Northern Europe. These findings  
974 underline the differences in the mechanisms behind the proliferation of genetic, linguistic and  
975 cultural features and call for additional interdisciplinary studies on the integration of these  
976 diverse lines of evidence on human prehistory.

977

978

979

980 **References**

981

982 1. Allentoft, M. E. *et al.* Population genomics of Bronze Age Eurasia. *Nature* **522**, 167–172

983 (2015).

984 2. Haak, W. *et al.* Massive migration from the steppe was a source for Indo-European

985 languages in Europe. *Nature* **522**, 207–211 (2015).

986 3. Güntert, H. *Der Ursprung der Germanen*. (C. Winter, Heidelberg, 1934).

987 4. Childe, V. G. *The Aryans: A Study of Indo-European Origins*. (K. Paul, Trench, Trubner

988 & Company, Limited, 1926).

989 5. Anthony, D. W. Pontic-Caspian Mesolithic and Early Neolithic societies at the time of

990 the Black Sea flood: a small audience and small effects. in *The Black Sea Flood*

991 *Question: Changes in Coastline, Climate and Human Settlement* (eds. Yanko-Hombach,

992 V., Gilbert, A. S., Panin, N. & Dolukhanov, P. M.) (Springer Science & Business Media,

993 2006).

994 6. Kristiansen, K. *et al.* Re-theorising mobility and the formation of culture and language

995 among the Corded Ware Culture in Europe. *Antiquity* **91**, 334–347 (2017).

996 7. Prescott, C. Dramatic beginnings of Norway’s history? Archaeology and Indo-

997 Europeanization. in *Language and Prehistory of the Indo- European Peoples: A Cross-*

998 *disciplinary Perspective* (ed. Hyllested, A.) (Museum Tusulanum Press, 2017).

999 8. Kroonen, G., Hedeager, L., Prescott, C. & Kristiansen, K. Questions concerning the Indo-

1000 Europeanization of Scandinavia: The Germanic languages. in *Oxford Handbook of*

1001 *Scandinavian Archaeology* (Oxford University Press, Oxford, in press).

1002 9. Sims-Williams, P. An Alternative to ‘Celtic from the East’ and ‘Celtic from the West’.

1003 *Camb. Archaeol. J.* **30**, 511–529 (2020).

1004 10. Polomé, E. C. Methodological Aspects of Glotto-and Ethnogenesis of the Germanic

1005 Peoples. *Entsteh. Von Sprachen Volkern Giotto- Ethnogenetische Aspekte Eur. Sprachen*

- 1006        *Akten Des* **6**, 45–70 (1985).
- 1007    11. van Sluis, P., Jørgensen, A. R. & Kroonen, G. European Prehistory between Celtic and  
1008        Germanic: The Celto-Germanic Isoglosses Revisited. in *The Indo-European Puzzle*  
1009        *Revisited: Integrating Archaeology, Genetics, and Linguistics* (eds. Willerslev, E.,  
1010        Kroonen, G. & Kristiansen, K.) 193–244 (Cambridge University Press, Cambridge,  
1011        2023). doi:10.1017/9781009261753.018.
- 1012    12. Aikio, A. On Germanic-Saami contacts and Saami prehistory. *Suom.-Ugr. Seuran*  
1013        *Aikakauskirja* **2006**, 9–55 (2006).
- 1014    13. Kallio, P. The Indo-Europeans and the non-Indo- Europeans in prehistoric Northern  
1015        Europe. in *Language and prehistory of the Indo-European peoples: a cross-disciplinary*  
1016        *perspective* (eds. Hyllested, A., Whitehead, B. N., Olander, T. & Olsen, B. A.) (Museum  
1017        Tusculanum Press, Copenhagen, 2017).
- 1018    14. Polomé, E. C. Who are the Germanic people? in *Proto-Indo-European: The Archaeology*  
1019        *of a Linguistic Problem : Studies in Honor of Marija Gimbutas* (ed. Gimbutas, M.) 216–  
1020        244 (Institute for the Study of Man, Washington, D.C., 1987).
- 1021    15. Mallory, J. P. *In Search of the Indo-Europeans: Language, Archaeology and Myth*.  
1022        (Thames and Hudson, London, 1989).
- 1023    16. Schmidt, K. H. The Celts and the Ethnogenesis of the Germanic People. *Hist.*  
1024        *Sprachforsch. Hist. Linguist.* **104**, 129–152 (1991).
- 1025    17. Kristiansen, K. *Europe Before History*. Cambridge. (Cambridge University Press,  
1026        Cambridge, 1998).
- 1027    18. Heather, P. J. *The Fall of the Roman Empire*. (Pan Books, 2006).
- 1028    19. Drinkwater, J. F. *The Alamanni and Rome 213-496: (Caracalla to Clovis)*. (OUP Oxford,  
1029        2007).
- 1030    20. Kelly, G. *Ammianus Marcellinus: The Allusive Historian*. (Cambridge University Press,

- 1031 2008).
- 1032 21. Wickham, C. *The Inheritance of Rome: A History of Europe from 400 to 1000*. (Penguin  
1033 UK, 2009).
- 1034 22. Holst, M. K. *et al.* Direct evidence of a large Northern European Roman period martial  
1035 event and postbattle corpse manipulation. *Proc. Natl. Acad. Sci.* **115**, 5920–5925 (2018).
- 1036 23. Fulk, R. D. *A Comparative Grammar of the Early Germanic Languages*. (John  
1037 Benjamins, 2018). doi:10.1075/sigl.3.
- 1038 24. Kümmel, M. J. Reconstructing Proto-Germanic. in *Oxford Research Encyclopedia of*  
1039 *Linguistics* (2023). doi:10.1093/acrefore/9780199384655.013.931.
- 1040 25. Nielsen, H. F. *The Germanic Languages: Origins and Early Dialectal Interrelations*.  
1041 (University of Alabama Press, 1989).
- 1042 26. Ringe, D. A. *From Proto-Indo-European to Proto-Germanic*. (Oxford University Press,  
1043 2017).
- 1044 27. Schwantes, G. Die Jastorf-Zivilisation. in *Reinecke Festschrift* (eds. Behrens, G. &  
1045 Werner, J.) (Mainz, 1950).
- 1046 28. Ringe, D. Proto-Germanic. in *From Proto-Indo-European to Proto-Germanic* (ed. Ringe,  
1047 D.) 0 (Oxford University Press, 2017). doi:10.1093/oso/9780198792581.003.0004.
- 1048 29. Salmons, J. 59. The evolution of Germanic. in *Handbook of Comparative and Historical*  
1049 *Indo-European Linguistics* vol. 2 1002–1027 (De Gruyter Mouton, 2017).
- 1050 30. Hansen, B. S. S. & Kroonen, G. J. Germanic. in *The Indo-European Language Family*  
1051 (ed. Olander, T.) 152–172 (Cambridge University Press, Cambridge, 2022).  
1052 doi:10.1017/9781108758666.010.
- 1053 31. Agee, J. R. Using Historical Glottometry to Subgroup the Early Germanic Languages. *J.*  
1054 *Ger. Linguist.* **33**, 319–357 (2021).
- 1055 32. Wolfram, H. *The Roman Empire and Its Germanic Peoples*. (Univ of California Press,



- 1056 2005).
- 1057 33. Wolfram, H. *History of the Goths*. (University of California Press, 1990).
- 1058 34. Jordanes. *The Origin and Deeds of the Goths: In English Version*. (Princeton University  
1059 Press, 1908).
- 1060 35. Svennung, J. *Jordanes und Scandia: kritisch-exegetische Studien*. (Almqvist & Wiksell ;  
1061 O. Harrassowitz, Stockholm, Wiesbaden, 1967).
- 1062 36. Svennung, J. Jordanes und die gotische Stammsage. in *Studia Gotica. Die eisenzeitlichen*  
1063 *Verbindungen zwischen Schweden und Südosteuropa* (ed. Hagberg, U. E.) (Kungl.  
1064 Vitterhets, Historie och Antikvitets Akademien, Stockholm, 1972).
- 1065 37. Hedeager, L. *Iron Age Myth and Materiality: An Archaeology of Scandinavia AD 400-*  
1066 *1000*. (Routledge, 2011).
- 1067 38. Andersson, T. Goten: § 1. Namenkundliches. in *Reallexikon der Germanischen*  
1068 *Altertumskunde* (eds. Heinrich, B., Steuer, H. & Timpe, D.) vol. 12 402–403 (De Gruyter,  
1069 1998).
- 1070 39. Hachmann, R. Die Goten und Skandinavien. in *Quellen und Forschungen zur Sprach-*  
1071 *und Kulturgeschichte der germanischen Völker. N.F.* vol. 34 (De Gruyter, 1970).
- 1072 40. Goffart, W. Jordanes's 'Getica' and the Disputed Authenticity of Gothic Origins from  
1073 Scandinavia. *Speculum* **80**, 379–398 (2005).
- 1074 41. Christensen, A. S. *Cassiodorus, Jordanes and the History of the Goths: Studies in a*  
1075 *Migration Myth*. (Museum Tusulanum Press, 2002).
- 1076 42. Steuer, H. „Germanen“ aus Sicht der Archäologie: Neue Thesen zu einem alten Thema.  
1077 in „Germanen“ aus Sicht der Archäologie (De Gruyter, 2021).  
1078 doi:10.1515/9783110702675.
- 1079 43. Foulke, W. D. Paul the Deacon. History of the Langobards. (1907).
- 1080 44. Menghin, W. *Die Langobarden. Archäologie und Geschichte*. (Konrad Theiss Verlag,

- 1081 Stuttgart, 1985).
- 1082 45. Amorim, C. E. G. *et al.* Understanding 6th-century barbarian social organization and  
1083 migration through paleogenomics. *Nat. Commun.* **9**, 3547 (2018).
- 1084 46. Veeramah, K. R. *et al.* Population genomic analysis of elongated skulls reveals extensive  
1085 female-biased immigration in Early Medieval Bavaria. *Proc. Natl. Acad. Sci.* **115**, 3494–  
1086 3499 (2018).
- 1087 47. Gretzinger, J. *et al.* The Anglo-Saxon migration and the formation of the early English  
1088 gene pool. *Nature* **610**, 112–119 (2022).
- 1089 48. Stolarek, I. *et al.* Genetic history of East-Central Europe in the first millennium CE.  
1090 *Genome Biol.* **24**, 173 (2023).
- 1091 49. Amory, P. *People and Identity in Ostrogothic Italy, 489–554 (Cambridge Studies in*  
1092 *Medieval Life and Thought 4th Series 33)*. (Cambridge, 1997).
- 1093 50. Pohl, W. Memory, Identity and Power in Lombard Italy. in *The Uses of the Past in the*  
1094 *Early Middle Ages* (eds. Hen, Y. & Innes, M.) (Cambridge University Press, 2000).
- 1095 51. Halsall, G. *Barbarian Migrations and the Roman West, 376–568*. (Cambridge University  
1096 Press, 2007).
- 1097 52. Heather, P. J. *Empires and Barbarians*. (Macmillan, 2009).
- 1098 53. Looijenga, T. *Texts and Contexts of the Oldest Runic Inscriptions*. (Brill, Netherlands,  
1099 2003).
- 1100 54. Birkmann, T. 71. A survey of ancient Nordic sources. in *The Nordic languages. An*  
1101 *international handbook of the history of the North Germanic languages* 619–625 (De  
1102 Gruyter Mouton, 2008). doi:10.1515/9783110197051-071.
- 1103 55. van Dijk, E. *et al.* Climatic and societal impacts in Scandinavia following the 536 and  
1104 540 CE volcanic double event. *Clim. Past* **19**, 357–398 (2023).
- 1105 56. Antonio, M. L. *et al.* Stable population structure in Europe since the Iron Age, despite

- 1106 high mobility. *eLife* **13**, e79714 (2024).
- 1107 57. Geary, P. J. *The Myth of Nations: The Medieval Origins of Europe*. (Princeton University  
1108 Press, 2003).
- 1109 58. Ringbauer, H. *et al.* ancIBD - Screening for identity by descent segments in human  
1110 ancient DNA. 2023.03.08.531671 Preprint at <https://doi.org/10.1101/2023.03.08.531671>  
1111 (2023).
- 1112 59. Allentoft, M. E. *et al.* 100 ancient genomes show repeated population turnovers in  
1113 Neolithic Denmark. *Nature* **625**, 329–337 (2024).
- 1114 60. Allentoft, M. E. *et al.* Population genomics of post-glacial western Eurasia. *Nature* **625**,  
1115 301–311 (2024).
- 1116 61. Sousa da Mota, B. *et al.* Imputation of ancient human genomes. *Nat. Commun.* **14**, 3660  
1117 (2023).
- 1118 62. Lawson, D. J., Hellenthal, G., Myers, S. & Falush, D. Inference of Population Structure  
1119 using Dense Haplotype Data. *PLOS Genet.* **8**, e1002453 (2012).
- 1120 63. Fischer, C.-E. *et al.* Origin and mobility of Iron Age Gaulish groups in present-day  
1121 France revealed through archaeogenomics. *iScience* **25**, (2022).
- 1122 64. Furholt, M. Social Worlds and Communities of Practice: a polythetic culture model for  
1123 3rd millennium BC Europe in the light of current migration debates. *Préhistoires*  
1124 *Méditerranéennes* (2020) doi:10.4000/pm.2383.
- 1125 65. Schiffels, S. *et al.* Iron Age and Anglo-Saxon genomes from East England reveal British  
1126 migration history. *Nat. Commun.* **7**, 10408 (2016).
- 1127 66. Lazaridis, I. *et al.* The genetic history of the Southern Arc: A bridge between West Asia  
1128 and Europe. *Science* **377**, eabm4247 (2022).
- 1129 67. Narasimhan, V. M. *et al.* The formation of human populations in South and Central Asia.  
1130 *Science* **365**, eaat7487 (2019).

- 1131 68. Glob, P. V. Studier over den jyske enkeltgravskultur. in *Fortid Og Nutid* 298–302  
1132 (Gyldendal, 1945).
- 1133 69. Iversen, R. & Kroonen, G. Talking Neolithic: Linguistic and Archaeological Perspectives  
1134 on How Indo-European Was Implemented in Southern Scandinavia. *Am. J. Archaeol.*  
1135 **121**, 511–525 (2017).
- 1136 70. Larsson, M. N. *et al.* Ancient Sheep Genomes reveal four Millennia of North European  
1137 Short-Tailed Sheep in the Baltic Sea region. 2023.06.26.544912 Preprint at  
1138 <https://doi.org/10.1101/2023.06.26.544912> (2023).
- 1139 71. Müller, J. & Vandkilde, H. The Nordic Bronze Age Rose from Copper Age Diversity:  
1140 Contrasts in the Cimbrian Peninsula. in *Contrasts of the Nordic Bronze Age* (eds.  
1141 Austvoll, K. I. *et al.*) vol. 1 29–48 (Brepols Publishers, Turnhout, 2020).
- 1142 72. Østmo, E. *Kriggergraver: en dokumentarisk studie av senneolittiske hellekister i Norge.*  
1143 (Kulturhistorisk Museum, Universitet i Oslo, 2011).
- 1144 73. Johannsen, J. W. The Late Neolithic Expansion: Ancient and new traditions 2350-1700  
1145 BC. *Dan. J. Archaeol.* **12**, 1–22 (2023).
- 1146 74. Austvoll, K. I. *Seaways to Complexity: A Study of Sociopolitical Organisation Along the*  
1147 *Coast of Northwestern Scandinavia in the Late Neolithic and Early Bronze Age.*  
1148 (Equinox Publishing Limited, 2021).
- 1149 75. Vandkilde, H. *The Metal Hoard from Pile in Scania, Sweden: Place, Things, Time,*  
1150 *Metals, and Worlds around 2000 BCE.* (Aarhus Universitetsforlag, 2017).
- 1151 76. Kristiansen, K. Contrasting 3rd and 2nd millennium BC mobility in temperate Europe:  
1152 migration versus trade. in *Moving northward: Professor Volker Heyd's Festschrift as he*  
1153 *turns 60* (eds. Lahelma, A. *et al.*) (The Archaeological Society of Finland, Helsinki,  
1154 2023).
- 1155 77. Aikio, A. An essay on Saami ethnolinguistic prehistory. in *A Linguistic Map of*

- 1156 *Prehistoric Northern Europe* (eds. Grünthal, R. & Kallio, P.) vol. 226 63–117 (Société  
1157 Finno-Ougrienne, Helsinki: Suomalais-Ugrilainen Seura, 2012).
- 1158 78. Lang, V. Formation of Proto-Finnic – an archaeological scenario from the Bronze Age /  
1159 Early Iron Age. in *Congressus duodecimus Internationalis Fenno-Ugristarum, Oulu*  
1160 *2015: plenary papers* (eds. Mantila, H., Leinonen, K., Brunni, S., Palviainen, S. &  
1161 Sivonen, J.) 63–84 (University of Oulu, Oulu, 2015).
- 1162 79. Hirt, H. Die Urheimat der Germanen: Nachwort. in *Neue Jahrbücher für das klassische*  
1163 *Altertum, Geschichte und deutsche Litteratur* vol. 3 570–572 (1899).
- 1164 80. Hachmann, R., Kossack, G. & Kuhn, H. *Völker zwischen Germanen und Kelten:*  
1165 *Schriftquellen, Bodenfunde und Namengut zur Geschichte des nördlichen*  
1166 *Westdeutschlands um Christi Geburt.* (Wachholtz, Rhine River Valley, 1962).
- 1167 81. Schrijver, P. 3. Frisian between the Roman and the Early Medieval Periods: Language  
1168 contact, Celts and Romans. in *3. Frisian between the Roman and the Early Medieval*  
1169 *Periods: Language contact, Celts and Romans* 43–52 (Boydell and Brewer, 2017).  
1170 doi:10.1515/9781787440630-010.
- 1171 82. Knol, E. & IJssennagger, N. Palaeogeography and People. in *Frisians and Their North*  
1172 *Sea Neighbours: From the Fifth Century to the Viking Age* (eds. Hines, J. &  
1173 IJssennagger, N.) 5–24 (Boydell & Brewer, 2017).
- 1174 83. Olalde, I. *et al.* The genomic history of the Iberian Peninsula over the past 8000 years.  
1175 *Science* **363**, 1230–1234 (2019).
- 1176 84. Diaconus, P. *History of the Lombards.* (University of Pennsylvania Press, 1974).
- 1177 85. Arthur, F. *et al.* The impact of volcanism on Scandinavian climate and human societies  
1178 during the Holocene: Insights into the Fimbulwinter eruptions (536/540 AD). *The*  
1179 *Holocene* 09596836231225718 (2024) doi:10.1177/09596836231225718.
- 1180 86. Knirk, J. E. 73. Runes : Origin, development of the futhark, functions, applications, and



- 1181 methodological considerations. in *The Nordic Languages: Volume 1* 634–648 (De  
1182 Gruyter Mouton, 2008). doi:10.1515/9783110197051-073.
- 1183 87. Barnes, M. P. *Runes: A Handbook*. (Boydell Press, 2012).
- 1184 88. Schulte, M. Runology and historical sociolinguistics: On runic writing and its social  
1185 history in the first millennium. *J. Hist. Socioling.* **1**, 87–110 (2015).
- 1186 89. Ottosson, K. 90. Old Nordic: A definition and delimitation of the period. in *The Nordic*  
1187 *languages. An international handbook of the history of the North Germanic languages*  
1188 vol. 1 787–793 (De Gruyter Mouton, 2002).
- 1189 90. Riisøy, A. I. Danish Legal Procedure and a Common Scandinavian Law. in *Viking*  
1190 *encounters: Proceedings of the Eighteenth Viking Congress* (eds. Pedersen, A. &  
1191 Sindbæk, S. M.) 220–231 (Aarhus Universitetsforlag, 2020).
- 1192 91. Jordanes. Chapter 1:23. in *The Gothic History of Jordanes in English Version* (Princeton  
1193 University Press, 1915).
- 1194 92. Procopius. *De Bellis [History of the Wars Book I-VIII]*. (Harvard University Press, 1918).
- 1195 93. Skre, D. 3. Rulership and Ruler's Sites in 1st–10th-century Scandinavia. in *3. Rulership*  
1196 *and Ruler's Sites in 1st–10th-century Scandinavia* (ed. Skre, D.) 193–244 (De Gruyter,  
1197 2020). doi:10.1515/9783110421101-003.
- 1198 94. Söderberg, B. Aristokratiskt rum och gränsöverskridande. Järrestad och sydöstra Skåne  
1199 mellan region och rike 600-1100. *Skrifter. Riksantikvarieämbetet, Arkeologiska*  
1200 *undersökningar* vol. 62 (Lund University, 2005).
- 1201 95. *Viking Dynasties. The Royal Families of Lejre and Uppsala. Between Archaeology and*  
1202 *Text*. (Århus University Press, Århus, 2024).
- 1203 96. Gansum, T. Borre - a royal manor with halls, mounds, harbour and ship graves. in *Viking*  
1204 *Age Aristocratic Residences in Northern Europe* (ed. Ravn, M.) (Århus University Press.,  
1205 Århus, in press).

- 1206 97. Hedeager, L. Poetry and picturing in deep historical time. in *Re-imagining Periphery:*  
1207 *Archaeology and Text in Northern Europe from Iron Age to Viking and Early Medieval*  
1208 *Periods* (eds. Hillerdal, C. & Ilves, K.) 107–116 (Oxbow Books, 2020).
- 1209 98. Jørgensen, L. From tribute to the estate system, 3rd-12th century. A proposal for the  
1210 economic development of the magnates' residences in Scandinavia based on settlement  
1211 structure from Gudme, Tissø and Lejre. in *Kingdoms and Regionality: Transactions from*  
1212 *the 49th Sachsensymposium, 1998 in Uppsala* (ed. Arrhenius, B.) 73–82 (Archaeological  
1213 Research Laboratory, Stockholm University, Stockholm, 2001).
- 1214 99. Tummuscheit, A. & Witte, F. The Danevirke: Preliminary Results of New Excavations  
1215 (2010–2014) at the Defensive System in the German-Danish Borderland. *Offas Dyke J.* **1**,  
1216 114–136 (2019).
- 1217 100. Price, N. Climate change and the Fimbulwinter. in *Oxford Handbook of Scandinavian*  
1218 *Archaeology* (Oxford University Press, Oxford, in press).
- 1219 101. Holst, M. Farmsteads and communities. in *Oxford Handbook of Scandinavian*  
1220 *Archaeology* (Oxford University Press, Oxford, in press).
- 1221 102. McNeill, W. *Plagues and Peoples*. (Knopf Doubleday Publishing Group, 1998).
- 1222 103. Stang, C. S. *Lexikalische Sonderübereinstimmungen zwischen dem Slavischen,*  
1223 *Baltischen und Germanischen*. (Univ.-Forl., 1972).
- 1224 104. Grikpėdis, M. & Matuzeviciute, G. M. A Review of the Earliest Evidence of  
1225 Agriculture in Lithuania and the Earliest Direct AMS Date on Cereal. *Eur. J. Archaeol.*  
1226 **21**, 264–279 (2018).
- 1227 105. Piličiauskas, G. *et al.* The transition from foraging to farming (7000–500 cal BC) in  
1228 the SE Baltic: A re-evaluation of chronological and palaeodietary evidence from human  
1229 remains. *J. Archaeol. Sci. Rep.* **14**, 530–542 (2017).
- 1230 106. Kroonen, G., Jakob, A., Palmér, A. I., Sluis, P. van & Wigman, A. Indo-European

- 1231 cereal terminology suggests a Northwest Pontic homeland for the core Indo-European  
1232 languages. *PLOS ONE* **17**, e0275744 (2022).
- 1233 107. Greenhill, S. J. Do languages and genes share cultural evolutionary history? *Sci. Adv.*  
1234 **7**, eabm2472 (2021).
- 1235 108. Barbieri, C. *et al.* A global analysis of matches and mismatches between human  
1236 genetic and linguistic histories. *Proc. Natl. Acad. Sci.* **119**, e2122084119 (2022).
