# Supplementary material for: Steppe Ancestry in Western Eurasia and the Spread of the Germanic Languages
Source: bioRxiv or medRxiv preprint supplement (doi:10.1101/2024.03.13.584607), 2025-01-07
Supplement: Supplementary file [file media-3.pdf]

Steppe Ancestry in western Eurasia and the spread of the Germanic  
Languages  
**Genetics Supplementary Material**

|                                                 |    |
|-------------------------------------------------|----|
| S2. Data Generation.....                        | 3  |
| Curation of included samples .....              | 3  |
| Drilling.....                                   | 3  |
| Demineralization .....                          | 4  |
| Ancient DNA Extraction .....                    | 4  |
| Manual extraction setup.....                    | 4  |
| Automated aDNA extraction setup.....            | 4  |
| USER-treatment.....                             | 5  |
| NGS Library preparation .....                   | 5  |
| Manual preparation.....                         | 5  |
| Automated NGS Library preparation .....         | 5  |
| Real-time PCR.....                              | 6  |
| Indexing PCR .....                              | 7  |
| Purification of amplified libraries.....        | 8  |
| Manual procedure .....                          | 8  |
| Automated purification.....                     | 8  |
| Quality Control (Fragment Analyzer) .....       | 8  |
| Pooling of libraries .....                      | 9  |
| Manual procedure .....                          | 9  |
| Automated procedure .....                       | 9  |
| Sequencing.....                                 | 9  |
| S3. Bioinformatics Preprocessing Pipeline ..... | 11 |
| Demultiplexing .....                            | 11 |
| Trimming .....                                  | 11 |
| Mapping.....                                    | 12 |
| Duplicate Marking .....                         | 13 |
| Library complexity .....                        | 13 |
| S4. DNA authentication.....                     | 14 |
| mapDamage .....                                 | 14 |
| ContamMix.....                                  | 14 |
| ANGSD .....                                     | 15 |

|    |                                                                                     |     |
|----|-------------------------------------------------------------------------------------|-----|
| 37 | S5. Imputation .....                                                                | 16  |
| 38 | S6. Demographic Inference .....                                                     | 19  |
| 39 | S6.1. PCA .....                                                                     | 19  |
| 40 | S6.2. IBD Clustering .....                                                          | 32  |
| 41 | S6.2.1. Whole Datasets Clustering .....                                             | 32  |
| 42 | S6.2.2. 2800 + Datasets Clustering .....                                            | 40  |
| 43 | S6.3. IBD Mixture Modelling.....                                                    | 45  |
| 44 | S6.3.1. Main Mixture Modelling Sets .....                                           | 45  |
| 45 | S6.3.2. Auxiliary Mixture Modelling Sets .....                                      | 51  |
| 46 | S6.4. Analysis of uniparental markers.....                                          | 52  |
| 47 | S6.4.1. Mitochondrial DNA analysis.....                                             | 52  |
| 48 | S6.4.2. Y-chromosome analysis .....                                                 | 58  |
| 49 | S6.5. DATES .....                                                                   | 72  |
| 50 | Results .....                                                                       | 72  |
| 51 | S6.6. Kinship .....                                                                 | 76  |
| 52 | S6.7. Extended discussion .....                                                     | 82  |
| 53 | S6.7.1 Genetic Outliers.....                                                        | 82  |
| 54 | S6.7.2 The Netherlands .....                                                        | 82  |
| 55 | S6.7.4 Norway .....                                                                 | 85  |
| 56 | S6.7.5 Langobards and Goths.....                                                    | 85  |
| 57 | S6.7.7. Britain and Ireland.....                                                    | 87  |
| 58 | S6.7.8. Ayrmyrlyg .....                                                             | 89  |
| 59 | S7. Pre-viking migration into Scandinavia.....                                      | 97  |
| 60 | S7.1. Summary .....                                                                 | 97  |
| 61 | S7.2. The impact of the volcanic double event in AD 536 and AD 539/540 on tree-ring |     |
| 62 | growth.....                                                                         | 99  |
| 63 | S7.3 Vegetation change 4000-800 cal BP in Scania, southern Sweden .....             | 103 |
| 64 |                                                                                     |     |
| 65 |                                                                                     |     |
| 66 |                                                                                     |     |

## 67 S2. Data Generation.

68 *Charleen Gaunitz, Lasse Vinner*

69 All aDNA laboratory procedures on non-amplified DNA were conducted in dedicated aDNA  
70 clean lab facilities at the Lundbeck Centre for GeoGenetics, University of Copenhagen,  
71 according to strict guidelines (Willerslev and Cooper 2005; Gilbert et al. 2005). Post  
72 amplification procedures were conducted in post-PCR laboratories physically separated from  
73 the clean lab facility.

74 During the project a semi-automated data generation pipeline was introduced over a two-year  
75 period, hence the samples included in the present study were processed in an increasingly  
76 automated manner as procedures were automated for extraction, library preparation, PCR  
77 setup, post-amplification purification, and library pooling.

### 78 Curation of included samples

79 In order to improve data quality and minimize destruction of unproductive samples, we  
80 implemented a thorough quality control check to make sure that all the samples analyzed, teeth  
81 and petrous bones, were of great quality.

82 Macroscopic study of the surface of the teeth using a magnifier and an indirect source of light  
83 was performed. We only considered teeth that were fully formed, erupted, and showing  
84 complete roots with the apex intact. We only retained teeth with roots of yellow to brownish  
85 color. Teeth with roots of chalky or white colors were excluded.

86 The petrous bones were considered when the portion containing the cochlea was present. The  
87 petrous bones that were cut off too short from the temporal bone were excluded as well as those  
88 that were showing a too chalky color aspect and a very light weight.

### 89 Drilling

90 Drilling was performed manually. If possible, right or left petrous bone, one tooth and  
91 associated calculus were subsampled from one individual. Upto 150 mg of crushed subsample  
92 were stored in a 2 ml LVL barcoded tube (XLX2000, DSC-X20-BL-NS-SLP-S). While  
93 sampling for DNA analysis, a small piece of bone (up to 1 gram) was collected for radiocarbon  
94 dating. Sample status was documented photographically before and after the destructive  
95 sampling. Sub-samples were stored at -20°C until demineralization.

## 96 Demineralization

97 Sample demineralization was carried out in two steps. First, an initial short incubation step was  
98 performed at 37°C for 30 min to increase the recovery rate for endogenous DNA, using 1.0ml  
99 of incomplete digestion buffer consisting of 0.5M EDTA and 30% N-Lauroylsarcosin  
100 (Damgaard et al. 2015). The buffer was replaced with 1.8ml of freshly prepared digestion  
101 buffer (0.5M EDTA, Proteinase K and 30% N-Lauroylsarcosin) and incubated for 48 to 72  
102 hours at 37°C on a rocking table. Demineralized samples (lysates) were stored at 4°C for no  
103 longer than 14 days, otherwise at -20°C for long term storage.

## 104 Ancient DNA Extraction

105 All aDNA extractions for this project were carried out according to (Rohland et al. 2018) using  
106 a modified version of the Qiagen PB buffer (Qiagen, cat: 19066). In total, two extractions were  
107 performed per lysate for initial library sequencing. One extraction per lysate underwent  
108 treatment with USER enzyme mix (NEB, cat: M5505L) the other remained untreated.

## 109 Manual extraction setup

110 For manual extractions 1.8 ml of lysate was combined with 18 ml of binding buffer (modified  
111 Qiagen PB binding buffer: 500 ml Qiagen PB, 15 ml Sodium acetate 3 M, 1.25 ml 5M NaCl,  
112 phenol red, adjusted to pH=5). The mix was passed through a large volume silica column  
113 (Roche, cat: 05114403001) by centrifugation for 4 min at 1500 rpm. The flow through was  
114 discarded and the step above repeated 2 times for the full volume. The column was washed  
115 twice using 750 µL 80% ethanol + 20% 10mM Tris-HCl (Qiagen, cat: 19065) and a  
116 centrifugation step of 30 seconds at 6-8 K·g, followed by a dry spin at full speed, according to  
117 kit protocol. The column was then transferred to a fresh 1.5 ml LoBind DNA Eppendorf tube  
118 (Eppendorf, cat: 0030108051) before final elution with 65 µl of 10 mM Tris-HCl + 0.05%  
119 Tween-20 incubated for 5 min at room temperature, followed by a centrifugation step for 1 min  
120 at 11.5 K·g. Extractions were stored at 4°C until library preparation, no more than 2 days or  
121 longer at -20°C.

## 122 Automated aDNA extraction setup

123 The aDNA extraction procedure was automated on the Biomek i5 Automated Workstation  
124 (Beckman Coulter) with the following adaptations: For each subsample 150 µl of  
125 demineralized lysate were combined with 1560 µl of binding buffer and 10 µl of magnetic



silica beads (G-Bioscience, cat: 786-915). The mixture was incubated for 15 min and tip-mixed every 5 min. Pelleted beads were washed twice in 450 µl and 100 µl of 80% ethanol + 20% 10 mM Tris-HCl, respectively (Qiagen PE, cat: 19065). The final product was eluted in 35 µl of 10 mM Tris-HCl + 0.05% Tween-20. Extracted DNA was stored in 96 well non-skirted plates (VWR) at 4°C until library preparation for no more than 2 days otherwise at -20°C. All extraction runs included a positive control sample and  $\geq 1$  negative control (buffer only). Robot deck specifications, method (.bmf format) and plastic/labware are provided on request. To verify successful DNA extraction, 2 µl of the positive and negative control extracts were measured on QuBit (dsDNA HS Assay Kit, cat: Q32851). The QuBit threshold value for the positive extraction control was  $>0.1$  ng/µl for approval, whereas the negative was below the lower detection limit.

## USER-treatment

For the USER-treatment 10 µl of USER Enzyme and 35 µl of DNA extract were mixed and incubated for 3 h at 37°C in a thermal cycler (SimpliAmp™ ThermoFischer). The treatment was performed in a 96 well format. After performing tests with reduced USER enzyme volume, the reaction volume of the USER enzyme was reduced to 2.5 µl. From May 2022 the USER treatment protocol reads: 2.5 µl USER Enzyme + 7.5 µl H<sub>2</sub>O + 35 µl aDNA, incubated for 3 h at 37°C.

## NGS Library preparation

### Manual preparation

Double-stranded DNA libraries were prepared according to (Meyer and Kircher 2010) from the USER- and one nonUSER-treated extracts, using input template volumes of 42.5 µl (final reaction volume 50 µl) and 21.25 µl (final reaction volume 2 µl), respectively. Clean-up steps were performed after the end-repair and adapter-ligation step, using 10 volumes of modified Qiagen binding buffer (as above) and MinElute columns (Qiagen, cat: 28004) otherwise according to the MinElute kit protocol.

### Automated NGS Library preparation

The NGS library preparation for USER-treated and non-USER-treated libraries was also adapted to the Biomek i5 Automated workstation (Beckman Coulter). Two different methods were written to accommodate the different input volumes of USER and non-USER extracts.

Clean-up steps were performed after the end-repair and adapter-ligation step, using 10 volumes of modified Qiagen binding buffer (as above) and 10 µl of magnetic silica beads (G-bioscience, cat: 786-915). Pelleted beads were washed twice in 450 µl and 100 µl of 80% ethanol + 20% 10 mM Tris-HCl, respectively (Qiagen PE buffer). The purified products were eluted in 10 mM Tris-HCl + 0.05% Tween-20. Robot deck specifications, method (.bmf format) and plastic/labware are provided on request.

## Real-time PCR

We used real-time PCR for determining the number of PCR cycles required in the indexing PCR, for each batch of libraries. Excluding the control libraries,  $c_t$ -values for the sample libraries were converted to a consensus amplification cycle number, considering amplification curves,  $c_t$ -values and melting curves. The qPCR with a final reaction volume of 20 µl was set up manually in a 96 well format (Roche, cat: 5102413001), using 1 µl of input material, 7 µl of H<sub>2</sub>O, 500 nM forward- and 500 nM reverse primer (10 mM) and 10 µl of 2x Lightcycler 480 SYBR green I MasterMix (Roche, cat: 4707516001). The qPCR amplification was run in the POST PCR lab facilities using the Roche LightCycler 480 Real-time PCR system (Roche).

| Primer ID  | Primer Sequence (5'-3')                      |
|------------|----------------------------------------------|
| qPCR CH_P5 | CTACTGACTTTCAGTGAGTGCAACCCACGACGCTCTTCCGATCT |
| qPCR CH_P7 | CTCTCACATTGAATCCGACTAGGATACGTGTGCTCTTCCGATCT |

## qPCR conditions

| Temp  | Time    | Cycles          |
|-------|---------|-----------------|
| 95 °C | 10 min  | 1               |
| 95 °C | 30 sec. | 30<br>Detection |
| 55 °C | 30 sec. |                 |
| 72 °C | 30 sec. |                 |
| 95 °C | 30 sec. | 1               |
| 55 °C | 30 sec. |                 |

|                       |         |           |
|-----------------------|---------|-----------|
| 95 °C<br>Slow<br>ramp | 30 sec. | Detection |
|-----------------------|---------|-----------|

## Indexing PCR

The indexing PCR was set up either in a small PCR reaction volume of 50 µl for non-USER-treated libraries or in a big PCR reaction volume of 100 µl for USER-treated libraries. For the small PCR reaction setup 25 µl of KAPA HiFi HotStart Uracil+ ReadyMix (Roche, cat: 07959079001) was mixed with 4 µl of UDI (8-bp index) or UDP (10-bp index) Illumina primer pairs (400 nM final conc. each) and 21 µl of template DNA. For the large PCR reaction setup 50 µl of KAPA HiFi HotStart Uracil+ ReadyMix (Roche, cat: 07959079001) was mixed with 8 µl of UDI or UDP Illumina primer pairs (400 nM final conc. each) and 42 µl of DNA.

PCR amplification conditions:

| Temp. | Time   | Cycles |
|-------|--------|--------|
| 98    | 45 sec | 1      |
| 98    | 15 sec | 12-18  |
| 65    | 30 sec |        |
| 72    | 30 sec |        |
| 72    | min    | 1      |

PCR amplification was performed in the post-PCR lab facilities. PCR amplification cycles were determined as described above. Indexing PCR setup was semi-automated on the Biomeki5 Automated Working station (Beckman Coulter). The KAPA HiFi HotStart Uracil+ ReadyMix (Roche, cat: 07959079001) was dispensed manually to a non-skirted 96 well PCR plate (VWR) using a multi-dispenser pipette and then placed on the 96-well cooling element on the Biomeki5. Index primer pairs and template DNA were then transferred by the multichannel robot head to the plate. Robot deck specifications, method (.bmf format) and plastic/labware are provided on request.

## 193 Purification of amplified libraries

### 194 Manual procedure

195 For non-USER- and USER-treated libraries, respectively, 80 µl or 160 µl of MagBio High-  
196 Prep PCR beads per library were transferred into a 96-deep well plate (e.g., ThermoFisher cat:  
197 267245). Subsequently 50 µl or 100 µl, respectively, of amplified library were added to the  
198 beads, thoroughly mixed and incubated for 5 min at room temperature. The plate was placed  
199 onto a magnetic plate and incubated until the supernatant was clear. While still on the magnet  
200 the beads were washed twice with 200 µl of 80% freshly made ethanol. After discarding the  
201 last washing buffer, the plate was left to dry for 2-5 min. The plate was removed from the  
202 magnet. The beads were resuspended in 35 µl of 10 mM tris-HCl pH= 8.5 (EB Buffer, Qiagen)  
203 and incubated for 2 min, before clearing the supernatant on the magnet (Alpaqua Magnum  
204 FLX). Once clear, the supernatant was transferred to a storage tube (LVL technologies, 2DSC-  
205 X03-BL-NS-SLC-S).

### 206 Automated purification

207 The purification was set up in an automated 96-well format using the CyBioFelix liquid handler  
208 (Analytik Jena), following the conditions described above. Two protocols are currently  
209 available. One using the 96R Head allowing the purification of 96 samples at once with a run  
210 time of 47 min., and one using the Choice Head (8-Channel). For the latter the number of  
211 samples to purify can be chosen. Minimum is 8 the maximum is 96. The final purified DNA  
212 library (35µl) is stored in SX 300 1D and 2D barcoded tubes (LVL technologies, 2DSC-X03-  
213 BL-NS-SLC-S) at -20°C. The rack is scanned prior purification using the Ziath express  
214 scanner. Labware and method are available upon request.

### 215 Quality Control (Fragment Analyzer)

216 Library concentration and fragment length distribution was determined by using the 5300  
217 Fragment Analyzer System (Agilent) with the HS NGS Fragment Kit (1-6000bp), 500 (cat:  
218 DNF-474-0500, Agilent). The standard protocol provided by Agilent is followed to run the HS  
219 NGS Fragment Kit, using 2 µl of library input with 22 µl Diluent Marker (total 24 µl) in a  
220 semi-skirted Eppendorf twin.tec PCR Plate 96. For data analysis the ProSize (Agilent)  
221 software was used.

## 222 Pooling of libraries

### 223 Manual procedure

224 Each sequencing pool consisted of a maximum of 96 libraries, with each library distinguishable  
225 by a unique index pair (Truseq UDP or UDI, Illumina). For initial sequencing the libraries were  
226 pooled equimolarly.

### 227 Automated procedure

228 The preparation of sequencing pools was automated on the CyBioFelix liquid handler  
229 (Analytik Jena), with the possibility to pool up to 192 uniquely indexed libraries in one run.  
230 Input pooling volumes, rack position and optional dilution requirement were loaded via a .csv  
231 file.

232 The pooling method itself is divided into 2 parts, which can be run separately. In the first step,  
233 a dilution of all libraries is prepared. The dilution factor is the same for all samples in the plate  
234 (typically 5 or 10-fold) and created to ensure no pipetting of  $\leq 1\mu\text{l}$ . In the second part of the  
235 method, the pooling of the diluted and undiluted libraries was carried out. Samples are  
236 transferred into a 1.5 ml Lobind Eppendorf tube, starting from the largest volume to the  
237 smallest volume. The final sequencing pool was purified manually using 1.6x volumes of  
238 paramagnetic beads (Magbio High prep Beads, cat: AC-60500), and washed with 80% freshly  
239 prepared ethanol (500 $\mu\text{l}$ ) removing residual adapters and indexing primer. To compensate for  
240 possible loss during purification, pools were eluted in 2/3 of their original volumes. CyBioFelix  
241 method- and labware files are available on request.

## 242 Sequencing

243 The molar concentration of sequencing pools was determined using qPCR (KAPA Library  
244 Quantification Kit, KAPA Biosystems, KR0405) according to kit protocol. All sequencing was  
245 done on the Illumina NovaSeq6000 platform at the GeoGenetics Sequencing Core. Sequencing  
246 chemistry version 1.0 was used in the beginning of the project but later switched to the latest  
247 version 1.5 in mid 2021 due to updated kit version. In-house comparison between kit versions  
248 revealed no biases in subsequent analysis pipelines. For the USER-treated libraries, pools were  
249 sequenced on the Illumina S4 flow cell, 200 cycles, generating  $\geq 10\text{G}$  paired-end reads. For the  
250 nonUSER-treated libraries, pools were sequenced on one lane of an Illumina S4 flowcell,  
251 2x100 cycles, using Illumina's XP-kit and -workflow, generating 2.5G sequencing reads of  
252 100bp paired-end. Loading concentrations for ancient DNA libraries deviate from Illumina

recommendations for loading concentrations, and differ between the two types of runs, i.e., full flow cells and XP-workflows. For a full flow cell run, aDNA library loading concentration is optimal at 700 pM and for the XP-runs, loading concentration seems optimal at 550-600 pM. Each pool is quality checked before sequencing, using Fragment Analyzer or Bioanalyzer to determine the average bp size and profile of the library, and a qPCR to determine molarity of the pool. The yields from full flow cells seem more stable >10G reads, than output from XP-workflows  $\geq 2.5$ G reads. Demultiplexing of sequencing output was performed on BaseSpace Sequence Hub (Illumina).

## References

- Damgaard, P. B., A. Margaryan, H. Schroeder, L. Orlando, E. Willerslev, and M. E. Allentoft. 2015. 'Improving access to endogenous DNA in ancient bones and teeth', *Sci Rep*, 5: 11184.
- Gilbert, M. Thomas P., Hans-Jürgen Bandelt, Michael Hofreiter, and Ian Barnes. 2005. 'Assessing ancient DNA studies', *Trends in Ecology & Evolution*, 20: 541-44.
- Meyer, M., and M. Kircher. 2010. 'Illumina sequencing library preparation for highly multiplexed target capture and sequencing', *Cold Spring Harb Protoc*, 2010: pdb.prot5448.
- Rohland, N., I. Glocke, A. Aximu-Petri, and M. Meyer. 2018. 'Extraction of highly degraded DNA from ancient bones, teeth and sediments for high-throughput sequencing', *Nat Protoc*, 13: 2447-61.
- Willerslev, E., and A. Cooper. 2005. 'Ancient DNA', *Proc Biol Sci*, 272: 3-16.

### S3. Bioinformatics Preprocessing Pipeline

*Abigail Ramsøe, Isin Altinkaya, Thorfinn Sand Korneliussen*

#### Demultiplexing

The sequencing data was demultiplexed on the BaseSpace Sequence Hub using BCL Convert (v4.0.3 [BCL Convert Support](#), Illumina Inc.), allowing for one mismatch in the index. As this strategy allows the inclusion of reads with a single mismatch in the index sequence, it avoids the needless exclusion of reads. Furthermore, as the libraries were sequenced using Unique Dual Indexing (UDI), and the Illumina index sets are designed with a Hamming distance of four, the chances of a sequenced read being misassigned is nil. This generates two fastq files (read 1 and read 2) per library per lane - in total two fastq files per library for XP runs, and eight for full flowcells.

#### Trimming

```
AdapterRemoval --threads {threads} --file1 {input.R1} --file2 {input.R2} --minlength 30 --  
adapter1 {a1} --adapter2 {a2} --collapse-conservatively --basename {params.out} --gzip
```

As we sequence 100bp reads, but, due to the characteristic short fragments of ancient DNA, we expect to sequence into the adapter sequence at the 3' end of the reads. As such, it is imperative to remove these technical sequences from the reads before downstream mapping and analysis. We use AdapterRemoval (2.3.2, (Schubert et al., 2016)) to remove adapter sequences from the 3' end of the sequenced paired end reads. We specify the adapter sequences to be the ends of the Illumina TruSeq adapters, before the index sequence, as shown in Table S3.1. This is to allow variations in index sequence lengths.

*Table S.3.1 Adapter sequences used by AdapterRemoval*

|                                                                | Adapter 1                         | Adapter 2                         |
|----------------------------------------------------------------|-----------------------------------|-----------------------------------|
| <b>Double-stranded libraries<br/>(and Santa Cruz Reaction)</b> | AGATCGGAAGAGCACACGTCTGAACTCCAGTCA | AGATCGGAAGAGCGTCGTGTAGGGAAAGAGTGT |

|                                      |                |                                       |                                  |
|--------------------------------------|----------------|---------------------------------------|----------------------------------|
| <b>Single-stranded<br/>libraries</b> | <b>(ss2.0)</b> | AGATCGGAAGAGCACA<br>CGTCTGAACTCCAGTCA | GGAAGAGCGTCGTGTA<br>GGGAAAGAGTGT |
|--------------------------------------|----------------|---------------------------------------|----------------------------------|

307

308 As reads below 30 base pairs are very problematic to align, they are discarded at this stage  
309 using the `--min-length` parameter. Here, paired end reads with an overlap of 11 base pairs or  
310 greater were collapsed into longer consensus sequences using the `--collapse-conservatively`  
311 parameter, which achieves an increase in the length and the quality of the insert sequences.  
312 This generates three fastq files per library per lane: pair 1, pair 2, and collapsed reads.

### 313 Mapping

314 `bwa aln -l 512 -t {threads} {REF} {input.fq} > {output.sai}`

315

316 We then map each of the generated fastq files against the human reference genome build 37  
317 (hs37d5, md5sum 12a0bed94078e2d9e8c00da793bbc84e) using `bwa aln` (0.7.17, (Li &  
318 Durbin, 2009)). Here, we disable seeding (`-l 512`) and instead perform end-to-end alignment,  
319 as suggested for ancient samples (Schubert et al., 2012) in order to maximise the number of  
320 reads mapping to the human genome. As each `bwa aln` step is an independent process, it  
321 happens in parallel for all trimmed fastqs in a given sequencing run.

322

323 `bwa samse -r \"{params}\" {REF} {input.sai1} {input.fq1} > {output.sam}`

324

325 `bwa sampe -r \"{params}\" {REF} {input.sai1} {input.sai2} {input.fq1} {input.fq2} >`  
326 `{output.sam}`

327

328 Next, when all alignments are completed, we use `bwa sampe` and `samse` (0.7.17, (Li & Durbin,  
329 2009)) on the paired and single end fastq and sai files respectively. At this step we set the RG  
330 tags of the resulting sam files. The ID tag is set to the fastq name plus whether the reads were  
331 paired or collapsed during adapter trimming, the SM tag is a unique sample identifier, and the  
332 LB tag is the library barcode. This allows accurate marking of duplicates during downstream  
333 analyses.

334

335 `samtools sort {input.cram} -@{threads} -m4G > {output.bam}`

336



337 This produces sam files, which are then sorted and converted into bam files using samtools sort  
338 (*v1.10 (Li et al., 2009)*). Lastly, paired- and single-end reads for each library and lane are  
339 merged together, such that there is one resulting bam file per library.

340

341 `samtools merge {output.merged} {input.bams} -@{threads}`

## 342 Duplicate Marking

343 `java -Djava.io.tmpdir={params.tmpdir} -XX:ParallelGCThreads={threads} -Xmx2g -jar`  
344 `{picard.jar} MarkDuplicates OPTICAL_DUPLICATE_PIXEL_DISTANCE=12000`  
345 `I={input} o={output} REMOVE_DUPLICATES=false METRICS_FILE={params.metrics}`  
346 `TAGGING_POLICY=All VALIDATION_STRINGENCY=LENIENT`

347

348 The library construction and sequencing processes create duplication of reads in libraries. Such  
349 duplicate reads add no extra information to the downstream analyses, and as such should be  
350 discarded. Duplicates were marked using Picard MarkDuplicates (2.25.0) with a pixel distance  
351 of 12000. For each duplicate read, this updates the flag to include the bitwise flag 1024,  
352 indicating that the read is a duplicate. These reads are not removed at this stage, but setting this  
353 flag prompts downstream software to disregard them.

## 354 Library complexity

355 `decluster/decluster {input} -w -p 12000 -@{threads} -o {params.out}`

356

357 For all screening libraries we extrapolated the possible yield from additional sequencing  
358 experiments. The approach is using a mark and recapture technique originally implemented in  
359 preseq (Daley et al., 2014) and works by downsampling the histogram of the PCR clonality  
360 multiplicities. The NovaSeq 6000 platform is, however, using a patterned flowcell technology,  
361 and depending on library load it will generate non-negligible amount of cluster duplicates. The  
362 preseq software is therefore not directly applicable to our sequencing data. Existing tools for  
363 removing these cluster duplicates from single end data are kmer based (Bushnell, 2014) and  
364 very memory intensive. Therefore, we developed a program, decluster, that constructs the PCR  
365 duplication table from the mapped data (<https://github.com/ANGSD/decluster>). Using the  
366 output of decluster, and information about how many reads were sequenced, we project how

many more reads would be needed to reach a given level of coverage, and use this information to inform further sequencing.

## S4. DNA authentication

*Abigail Ramsøe, Thorfinn Sand Korneliussen*

In order to ensure the authenticity of the sequenced data, we employed three approaches: mapDamage to quantify the extent of deamination, and two contamination estimates. These contamination estimates were first run on a library-level basis, and any contaminated libraries were excluded. When the different libraries for a sample were merged, the authentication methods were then rerun to ensure that there was still no contamination flagged. This strategy ensures the high-confidence detection of both ancient and modern human contamination.

All analysis was performed on filtered files with reads with a base quality of at least 20, and a mapping quality of at least 30. For ANGSD, we removed the pseudoautosomal regions on the X chromosome.

### mapDamage

```
mapDamage -i {input.bam} -r {REF}
```

In order to determine the authenticity of the ancient reads, the extent of the characteristic C->T deamination in libraries was quantified using mapDamage2.0 (Jónsson et al., 2013). Libraries were flagged for manual interpretation if the C->T extent at the 5' end, and/or G->A' extent at the 3' end did not follow expected parameters given the library type. mapDamage was also run on USER treated libraries, where we do not expect to see the ancient damage signal. Here, libraries were flagged if they exhibited the elevated C->T, as this could indicate a sample swap, or contamination from an ancient source.

### ContamMix

```
Rscript      contamix/estimate.R      --samFn      ${base}_ra.final.bam      --malnFn  
${base}_312.aligned.fasta --figure ${base}_contam.pdf --trimBases 7 > ${base}.summary.txt
```

Firstly, we applied ContamMix in order to quantify the fraction of exogenous content in the set of reads mapping to the mitochondrial genome by comparing the mtDNA consensus genome to 311 possible contaminant genomes (Fu et al., 2013). For each library two different versions of the endogenous mitochondrial genome were constructed. The first approach (CONTAMIX\_APPROX\_1Xdif05) used sites with at least 1x coverage, and at each position a base was only called if it was observed in at least 50% of reads covering the site. The second approach (CONTAMIX\_PRECISE\_5Xdif07) only considered sites with at least 5x coverage and 70% base concordance.

## ANGSD

```
{ANGSD} -i {bam} -r X:5000000-154900000 -doCounts 1 -iCounts 1 -minMapQ 30 -minQ
20 -out {base} ;
{ANGSDDIR}/misc/contamination -a {base}.icnts.gz -h
{ANGSDDIR}/RES/HapMapChrX.gz &>{base}.res
```

ANGSD (0.931, (Korneliussen et al., 2014)) was used in samples identified as males to estimate nuclear contamination by quantifying excess heterozygosity on the X chromosome. As males only have one copy of the X chromosome, any heterozygosity is due to contamination or sequencing error. Heterozygosity due to contamination is likely to be restricted to known polymorphic sites. As such, ANGSD quantifies the heterozygosity in these sites, and compares it to the excess heterozygosity in the flanking regions, which provides the level of background sequencing error. Thus, the extent of contamination is calculated.

## References

- Bushnell, B. (2014). *BBMap: A fast, accurate, splice-aware aligner* (No. LBNL-7065E). Lawrence Berkeley National Lab. (LBNL), Berkeley, CA (United States). <https://www.osti.gov/biblio/1241166>
- Daley, T., Helus, V., & Smith, A. (2014). *The preseq Manual*. Retrieved April 20, 2023, from <http://smithlabresearch.org/wp-content/uploads/manual.pdf>
- Fu, Q., Mitnik, A., Johnson, P. L. F., Bos, K., Lari, M., Bollongino, R., Sun, C., Giemsch, L., Schmitz, R., Burger, J., Ronchitelli, A. M., Martini, F., Cremonesi, R. G., Svoboda, J., Bauer, P., Caramelli, D., Castellano, S., Reich, D., Pääbo, S., & Krause, J. (2013). A revised timescale for human evolution based on ancient mitochondrial genomes. *Current*

*Biology: CB*, 23(7), 553–559.

Jónsson, H., Ginolhac, A., Schubert, M., Johnson, P. L. F., & Orlando, L. (2013). mapDamage2.0: fast approximate Bayesian estimates of ancient DNA damage parameters. *Bioinformatics*, 29(13), 1682–1684.

Korneliussen, T. S., Albrechtsen, A., & Nielsen, R. (2014). ANGSD: Analysis of Next Generation Sequencing Data. *BMC Bioinformatics*, 15, 356.

Li, H., & Durbin, R. (2009). Fast and accurate short read alignment with Burrows–Wheeler transform. *Bioinformatics*, 25(14), 1754–1760.

Li, H., Handsaker, B., Wysoker, A., Fennell, T., Ruan, J., Homer, N., Marth, G., Abecasis, G., Durbin, R., & 1000 Genome Project Data Processing Subgroup. (2009). The Sequence Alignment/Map format and SAMtools. *Bioinformatics*, 25(16), 2078–2079.

Schubert, M., Ginolhac, A., Lindgreen, S., Thompson, J. F., Al-Rasheid, K. A. S., Willerslev, E., Krogh, A., & Orlando, L. (2012). Improving ancient DNA read mapping against modern reference genomes. *BMC Genomics*, 13, 178.

Schubert, M., Lindgreen, S., & Orlando, L. (2016). AdapterRemoval v2: rapid adapter trimming, identification, and read merging. *BMC Research Notes*, 9, 88.

## S5. Imputation

Imputation was carried out on 3929 already published ancient genomes (Rasmussen *et al.*, 2010, 2014; Fu *et al.*, 2014; Gamba *et al.*, 2014; Lazaridis *et al.*, 2014; Olalde *et al.*, 2014; Raghavan *et al.*, 2014; Seguin-Orlando *et al.*, 2014; Skoglund *et al.*, 2014; Rasmussen *et al.*, 2015; Olalde *et al.*, 2015, 2015; Raghavan *et al.*, 2015; Allentoft *et al.*, 2015; Günther *et al.*, 2015; Jones *et al.*, 2015; Llorente *et al.*, 2015; Fu *et al.*, 2016; Broushaki *et al.*, 2016; Cassidy *et al.*, 2016; Gallego-Llorente *et al.*, 2016, 2016; Hofmanová *et al.*, 2016; Kılınç *et al.*, 2016; Martiniano *et al.*, 2016; Schiffels *et al.*, 2016; Skoglund *et al.*, 2017; Jones *et al.*, 2017; Martiniano *et al.*, 2017; González-Fortes *et al.*, 2017; Haber *et al.*, 2017; Hansen *et al.*, 2017; Lipson and Reich, 2017; Rodríguez-Varela *et al.*, 2017; Saag *et al.*, 2017; Schlebusch *et al.*, 2017; Sikora *et al.*, 2017; Unterländer *et al.*, 2017; Olalde *et al.*, 2018; Günther *et al.*, 2018; Amorim *et al.*, 2018, 2018; Damgaard *et al.*, 2018; de Barros Damgaard *et al.*, 2018; Ebenesersdóttir *et al.*, 2018; Fernandes *et al.*, 2018; Fregel *et al.*, 2018, 2018; Krzewińska, Kılınç, *et al.*, 2018; Krzewińska, Kjellström, *et al.*, 2018; Lindo *et al.*, 2018; McColl *et al.*, 2018; Mittnik *et al.*, 2018; Moreno-Mayar, Potter, *et al.*, 2018; Moreno-Mayar, Vinner, *et al.*, 2018; Scheib *et al.*, 2018; Valdiosera *et al.*, 2018; Veeramah *et al.*, 2018; Olalde *et al.*, 2019,

2019; González-Fortes *et al.*, 2019; Haber *et al.*, 2019; Saag *et al.*, 2019; Sikora *et al.*, 2019; Antonio *et al.*, 2019; Brace *et al.*, 2019, 2019; Järve *et al.*, 2019; Jensen *et al.*, 2019; Kanzawa-Kiriyama *et al.*, 2019; Kashuba *et al.*, 2019; Malmström *et al.*, 2019; Narasimhan *et al.*, 2019; Ning *et al.*, 2019; Sánchez-Quinto *et al.*, 2019; Schroeder *et al.*, 2019; Cassidy *et al.*, 2020; Fernandes *et al.*, 2020; Ning *et al.*, 2020; Brunel *et al.*, 2020; Coutinho *et al.*, 2020; Furtwängler *et al.*, 2020; Linderholm *et al.*, 2020; Marcus *et al.*, 2020; Margaryan *et al.*, 2020; Seguin-Orlando *et al.*, 2021; Kılınç *et al.*, 2021; Saag *et al.*, 2021; Clemente *et al.*, 2021; Egfjord *et al.*, 2021, 2021; Papac *et al.*, 2021; Posth *et al.*, 2021; Lazaridis *et al.*, 2022; Fischer *et al.*, 2022; Gretzinger *et al.*, 2022; Maróti *et al.*, 2022; Patterson *et al.*, 2022; Rodríguez-Varela *et al.*, 2023; Moots *et al.*, 2023; Allentoft, Sikora, Refoyo-Martínez, *et al.*, 2024; Barrie *et al.*, 2024) along with our newly generated 578 genomes using s GLIMPSE v1.1.1 (Rubinacci *et al.*, 2021), as described in (Allentoft, Sikora, Refoyo-Martínez, *et al.*, 2024, Mota *et al.*, 2022). As a reference panel, we used the 30X coverage version of the 1000 Genomes v5 phase 3 dataset (Auton *et al.*, 2015) that was phased using using the TOPMed panel (Taliun *et al.*, 2021), before being lifted over to hg19.

Whole-genome shotgun sequenced genomes and genome-wide targeted capture ('1240k') enriched for 1.24 million sites (Mathieson *et al.*, 2015) were included in this study. Studies have shown for this capture panel that off-target sites impute poorly even at higher coverages (Mota *et al.*, 2022), so all off-target sites were excluded for all samples. For the 1240k on-target sites, imputation performs similarly for genomes of 0.1X-0.5X for shotgun and 1X for capture. Previous studies have demonstrated shotgun samples at 0.1X are suitable for the same methods of demographic inference, even when applied on (Mesolithic and Neolithic) populations that are much more distantly related to the 1000G reference panel than the more recent samples that are the focus of this study (Allentoft, Sikora, Fischer, *et al.*, 2024; Allentoft, Sikora, Refoyo-Martínez, *et al.*, 2024). As such, coverage cut-offs were set at 0.1X for shotgun sequenced, and 1X for captured genomes. After this initial filtering, for each sample, the average genotype probability was calculated for all captured sites, and samples with a low average genotype probability (<0.90) were excluded (Figure S5.1). The final number of samples was 4,507.

The intersection of the 1.24 million capture sites and imputed 1000G sites left 1,085,103 SNPs. A series of filters were also applied to remove problematic sites. We kept sites with imputation score > 0.5 only covering the highly mappable regions in the genomes defined by the 1000 Genomes strict mappability mask leaving the final number of SNPS at 697,179.

In comparison, a study with a similar processing pipeline that only included shotgun sequenced ancient genomes resulted in a panel with over 10 times as many SNPs: 7,321,965 (Allentoft, Sikora, Refoyo-Martínez, *et al.*, 2024). However, for many regions and time periods of importance to this study, restricting to just capture samples would result in entire regions in time (e.g. Western Europe during the Bronze Age) and countries in general (e.g England and the Czech Republic) being under-represented (Figure S5.2). To address the research questions of the study, it was therefore necessary to restrict to the smaller SNP set.

Metadata for the samples was curated from the respective papers and from (Mallick *et al.*, 2023).

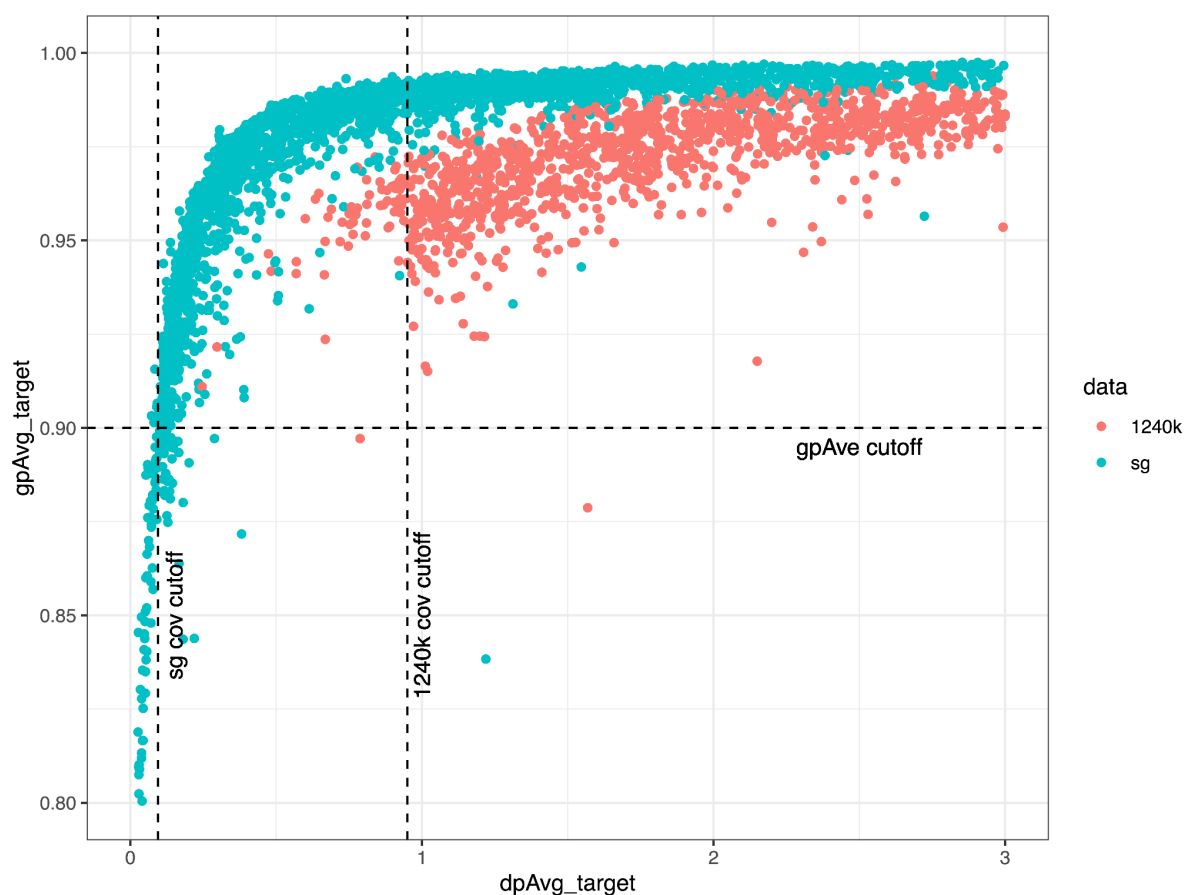

Figure S5.1. Relationship between the average genotype probability (gpAvg\_target) and sequencing depth (dpAvg\_target) for captured (1240k) and shotgun (sg) genomes, when restricting to target sites.

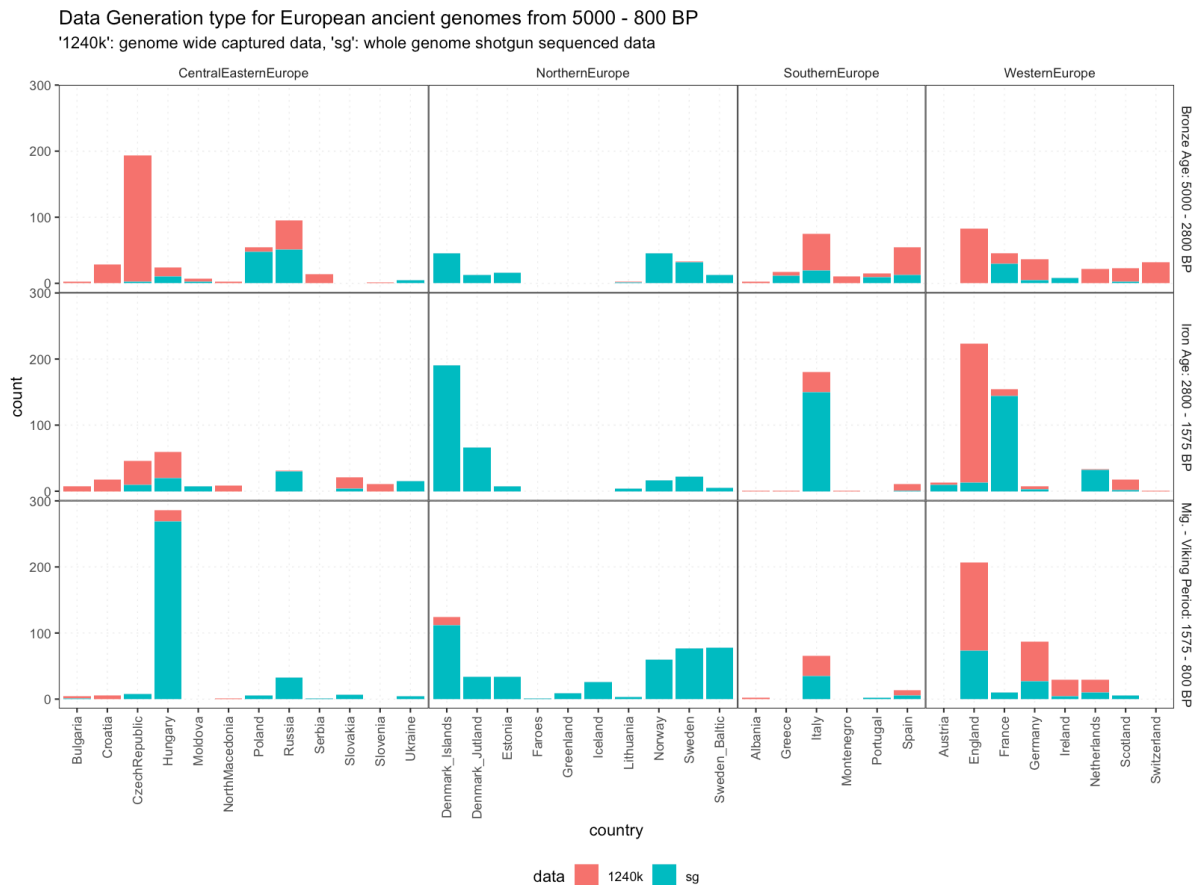

Figure S5.2. Figure showing the geographical and temporal distributions of ancient genomes in the final imputed dataset for each data generation method (1240k capture and shotgun sequencing).

## S6. Demographic Inference

### S6.1. PCA

To infer basic demographic structure in our data we carried out a principal component analysis (PCA) on the imputed dataset of shotgun genomes (see section S5) using GCTA (v1.94.1). To better visualise IBD clusters and finer scale patterns in the data, we plotted two panels of decreasing size and diversity, the first contains all 'out-of-Africa' populations, (n=4,495) and the second focussing on Western Eurasia (n=3,870). As depicted in Figure S6.1.1, the vast majority of samples from this study (highlighted with a black circle) fall within the European Bronze Age diversity, while a small number of samples display varying levels of Asian admixture.

527 Colouring the individuals in the PCA by their IBD clusters (Supplementary Note 6.4) shows a  
 528 correlation between established clines in PCA space and the IBD clustering (Figure S6.1.1).  
 529 For each of the major four clusters discussed in the main text (Yamnaya, Corded Ware (East),  
 530 Corded Ware (North), Bell Beaker), a PCA highlighting their subclusters been plotted (Figure  
 531 S6.1.2-13)  
 532

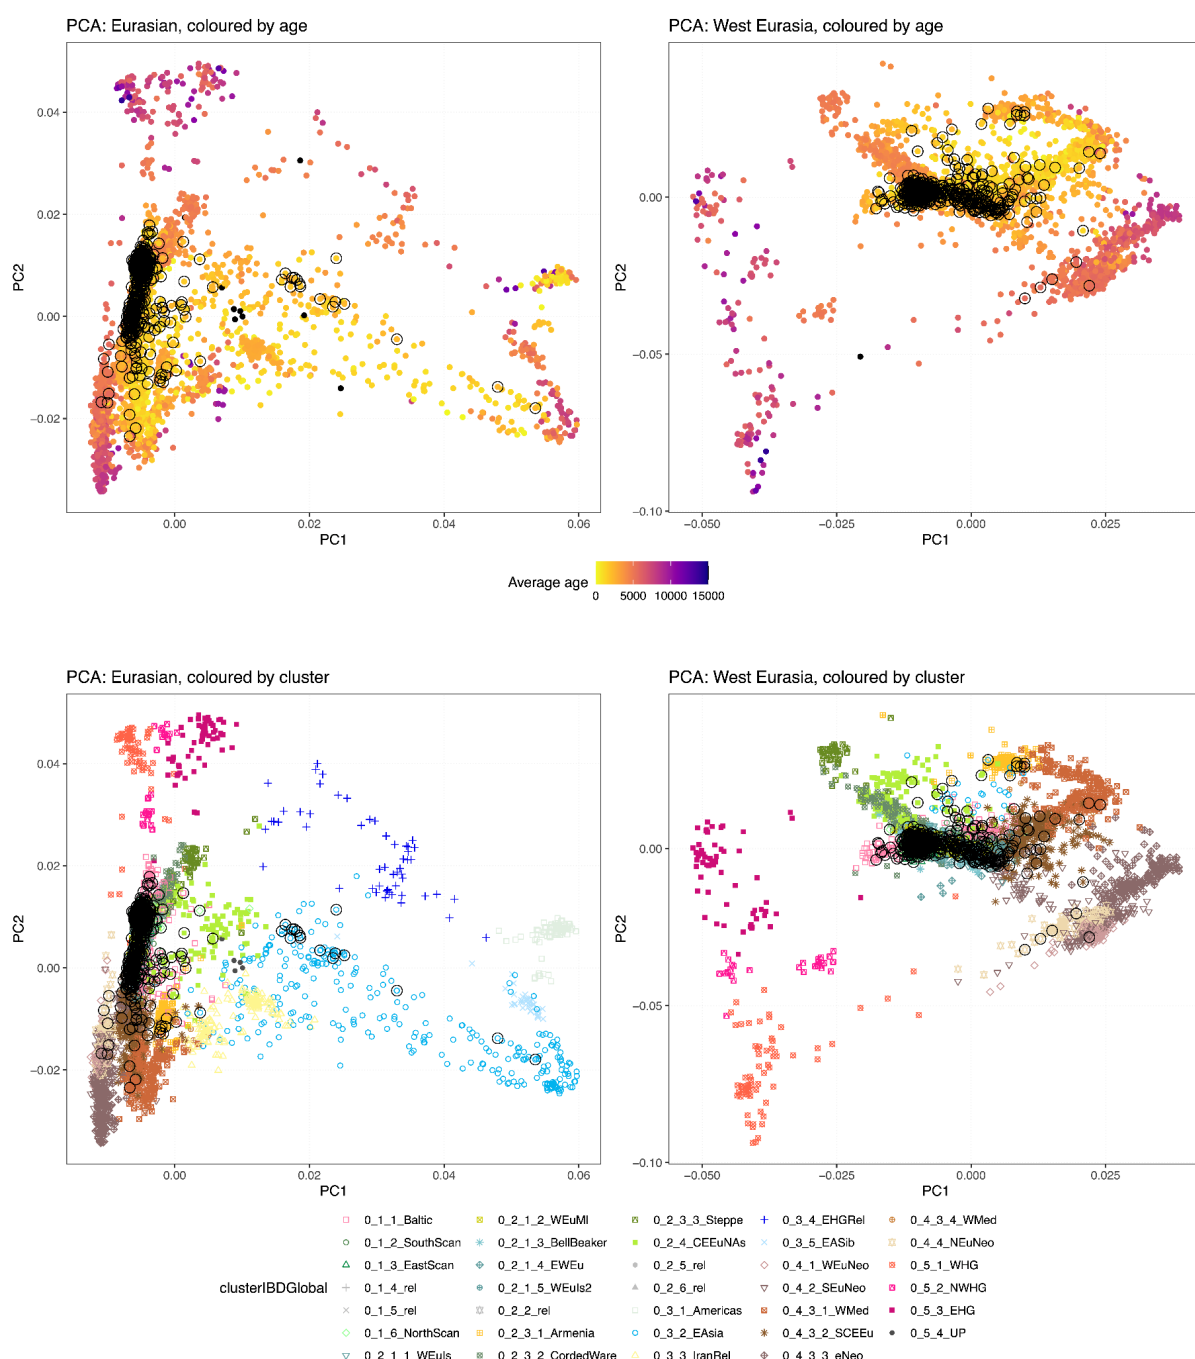

533  
 534  
 535 Figure S6.1.1 PCA of Eurasian and Western Eurasian ancient populations, coloured by age and  
 536 by IBD cluster. Circled individuals are newly generated in this project.



537

538

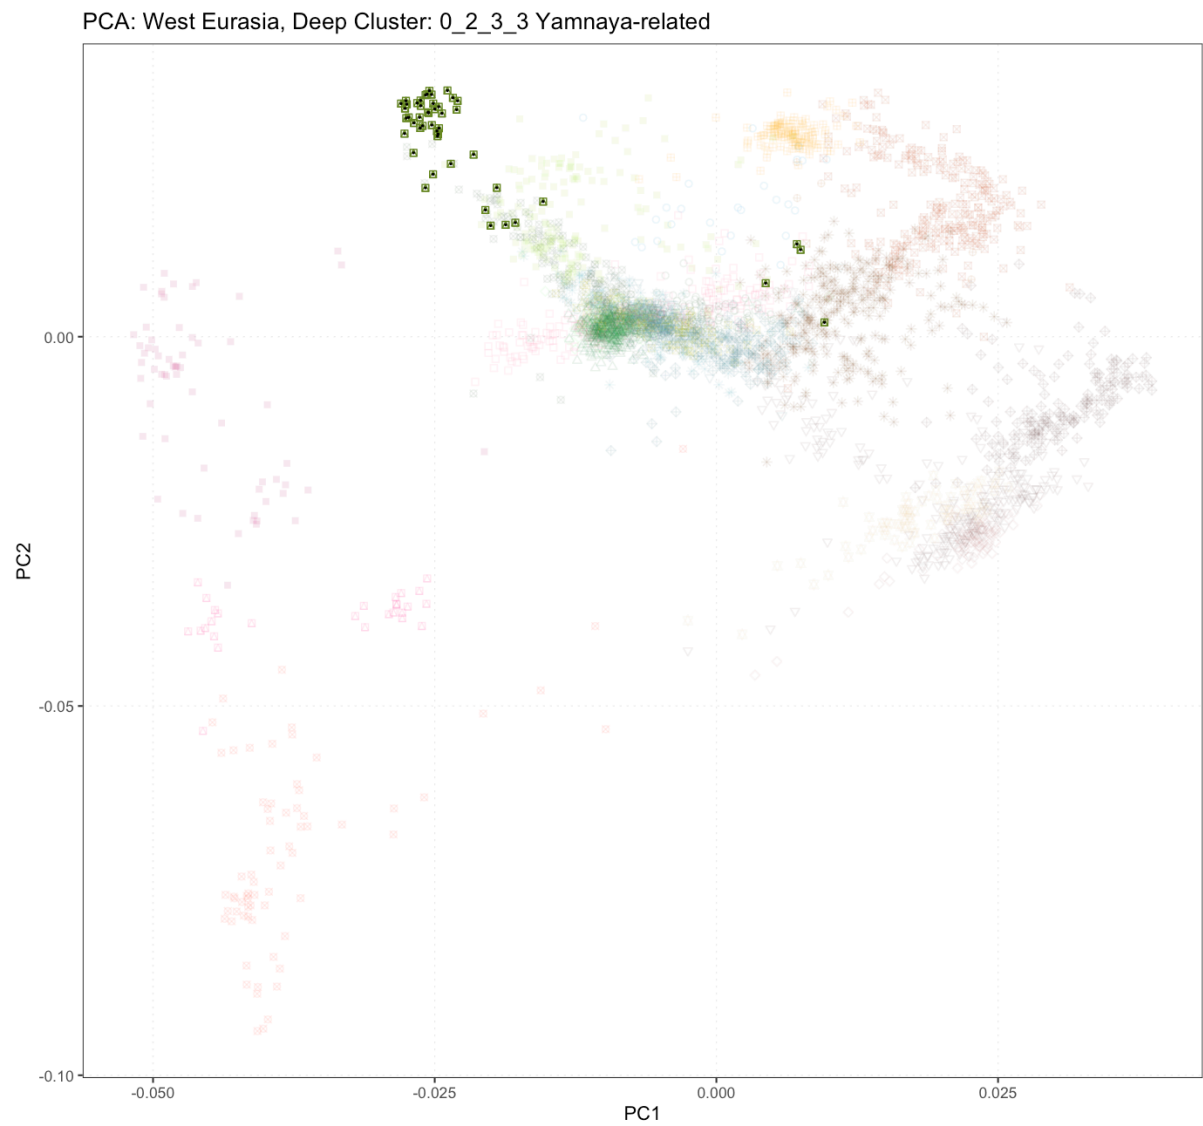

539

540 Figure S6.1.2 - Western Eurasian PCA highlighting the Yamnaya-related cluster. Individuals

541 older than 2800 BP are indicated with a ‘.’

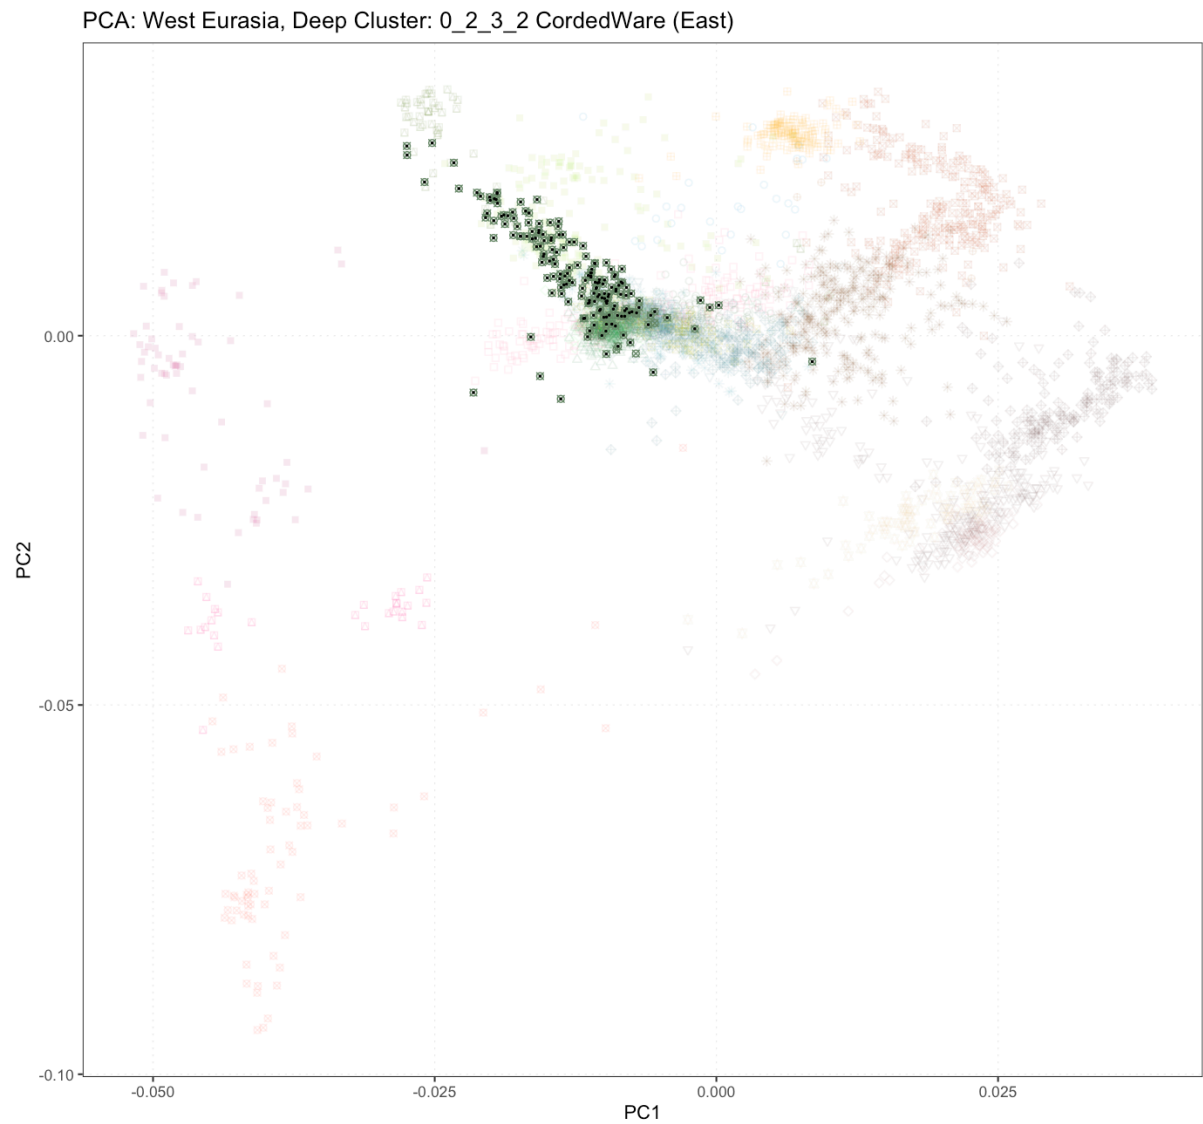

Figure S6.1.3 - Western Eurasian PCA highlighting the Corded Ware (East)-related ancestry. Individuals older than 2800 BP are indicated with a ‘.’

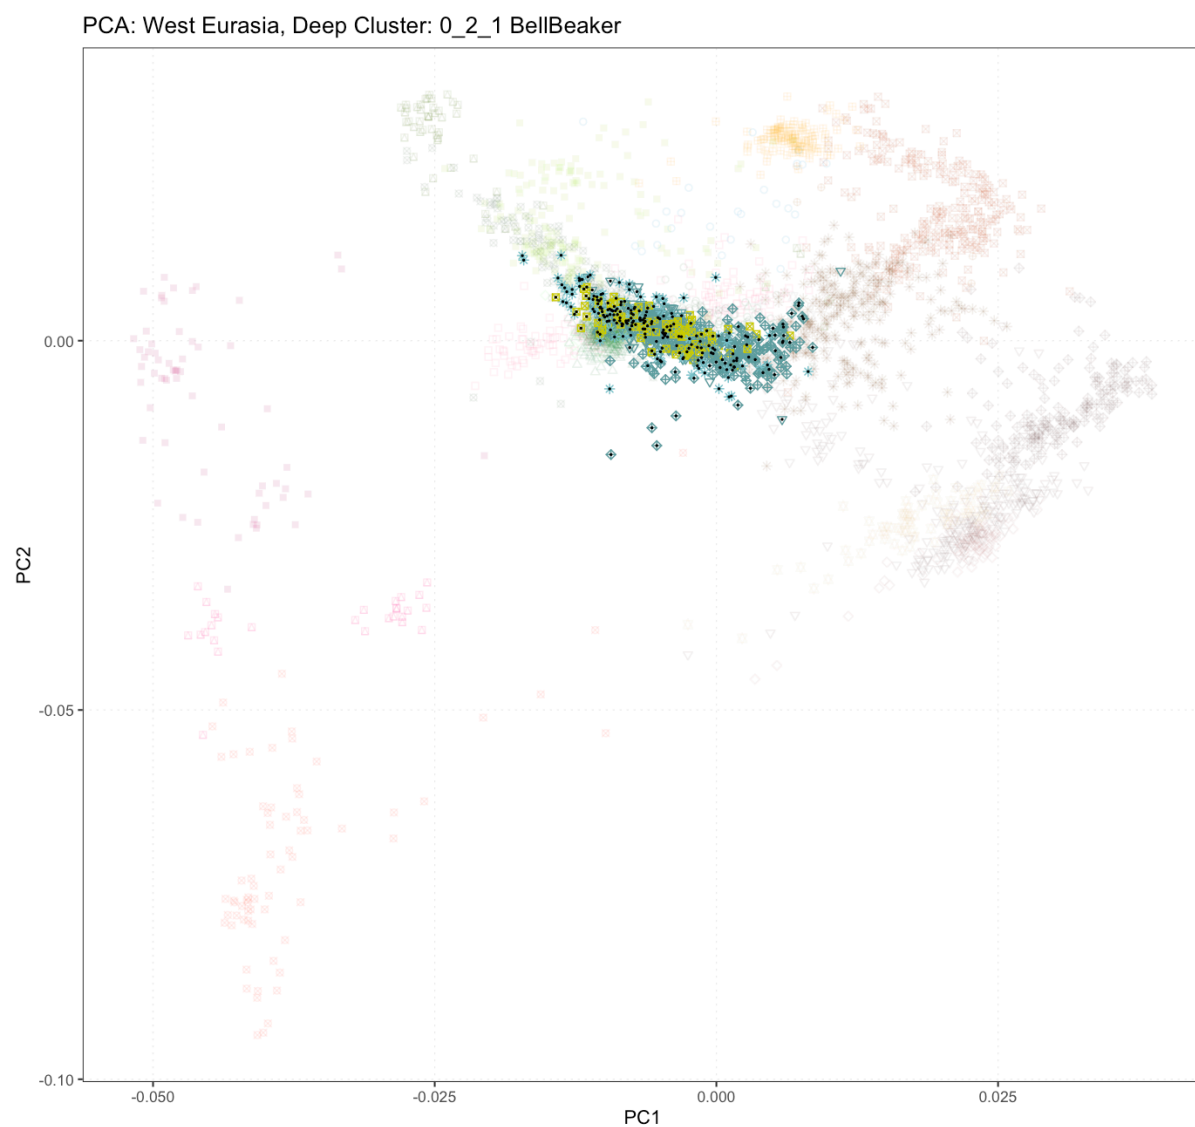

549

550 Figure S6.1.4. Western Eurasian PCA highlighting the Bell Beaker-related ancestry.

551 Individuals older than 2800 BP are indicated with a ‘.’

552

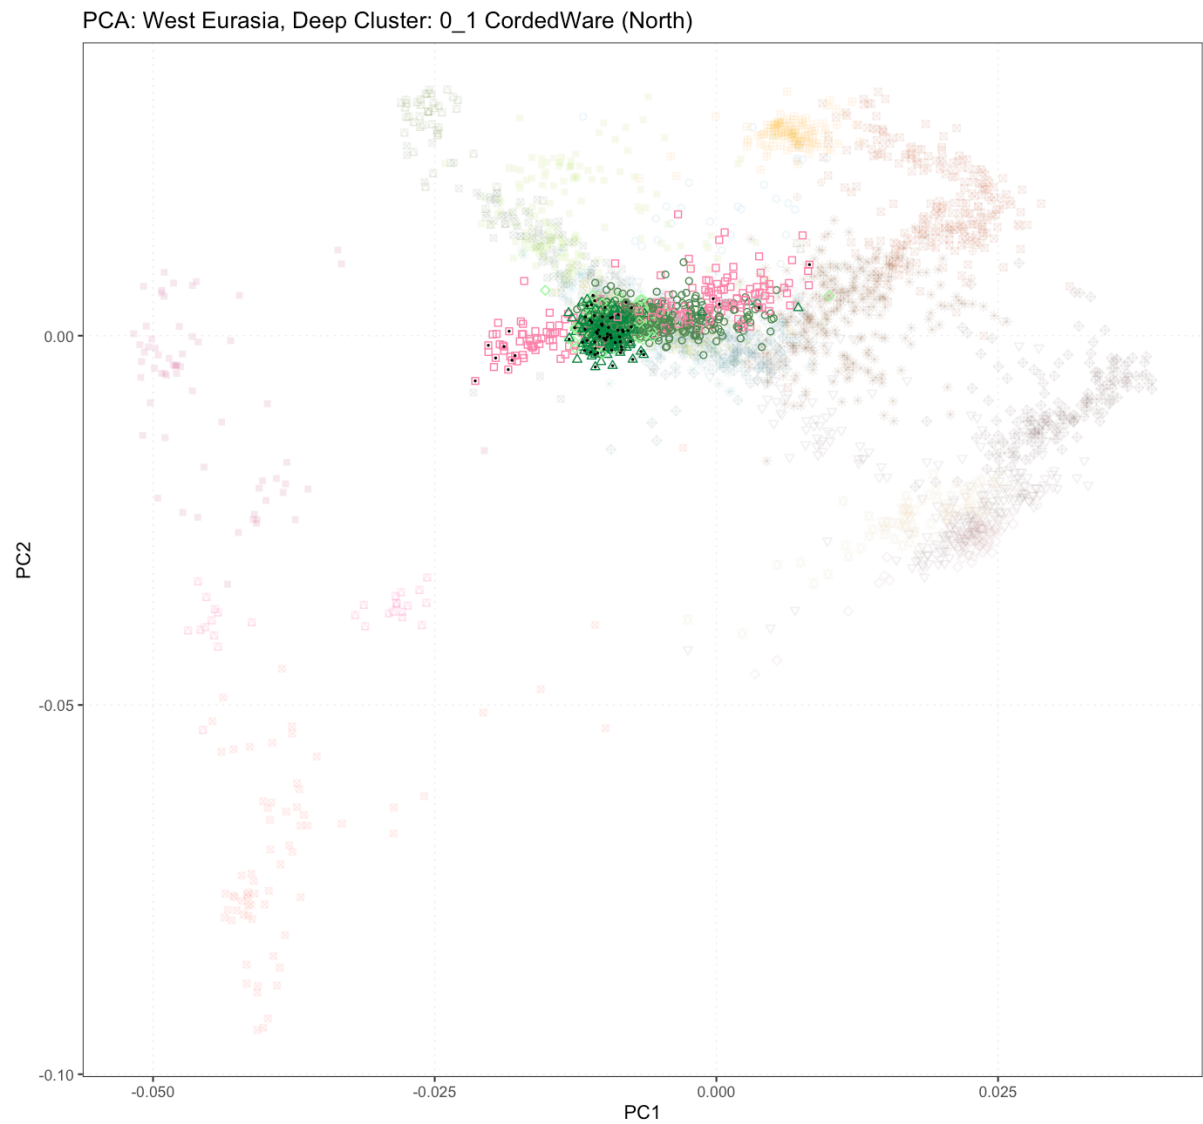

553

554 Figure S6.1.5. Western Eurasian PCA highlighting the Corded Ware (North)-related ancestry.

555 Individuals older than 2800 BP are indicated with a ‘.’

556

557

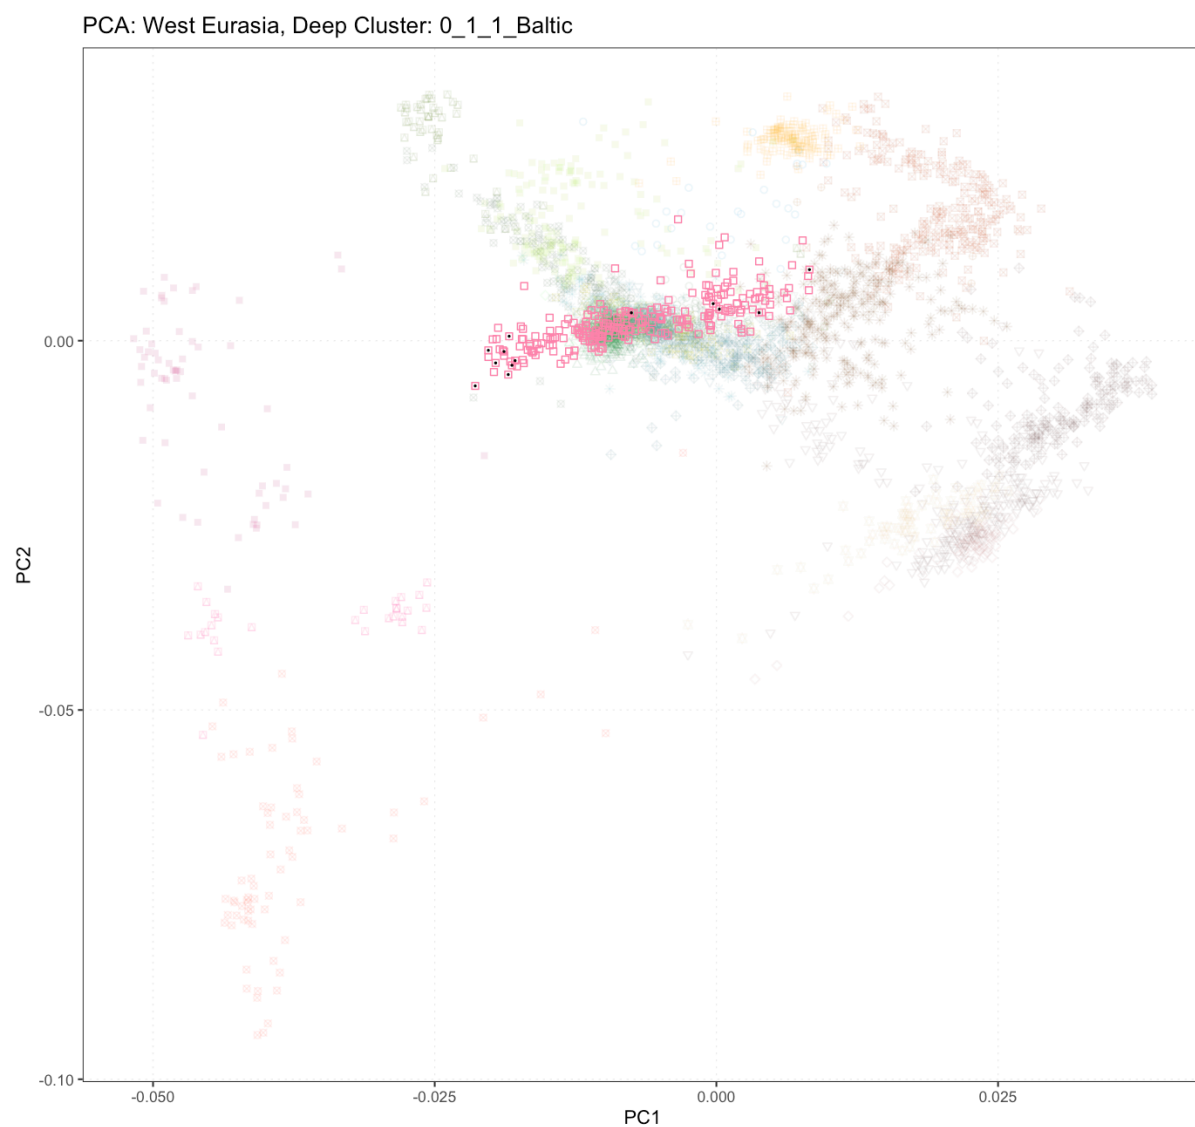

Figure S6.1.6. Western Eurasian PCA highlighting the Baltic subcluster of the Corded Ware (North) cluster. Individuals older than 2800 BP are indicated with a ‘.’

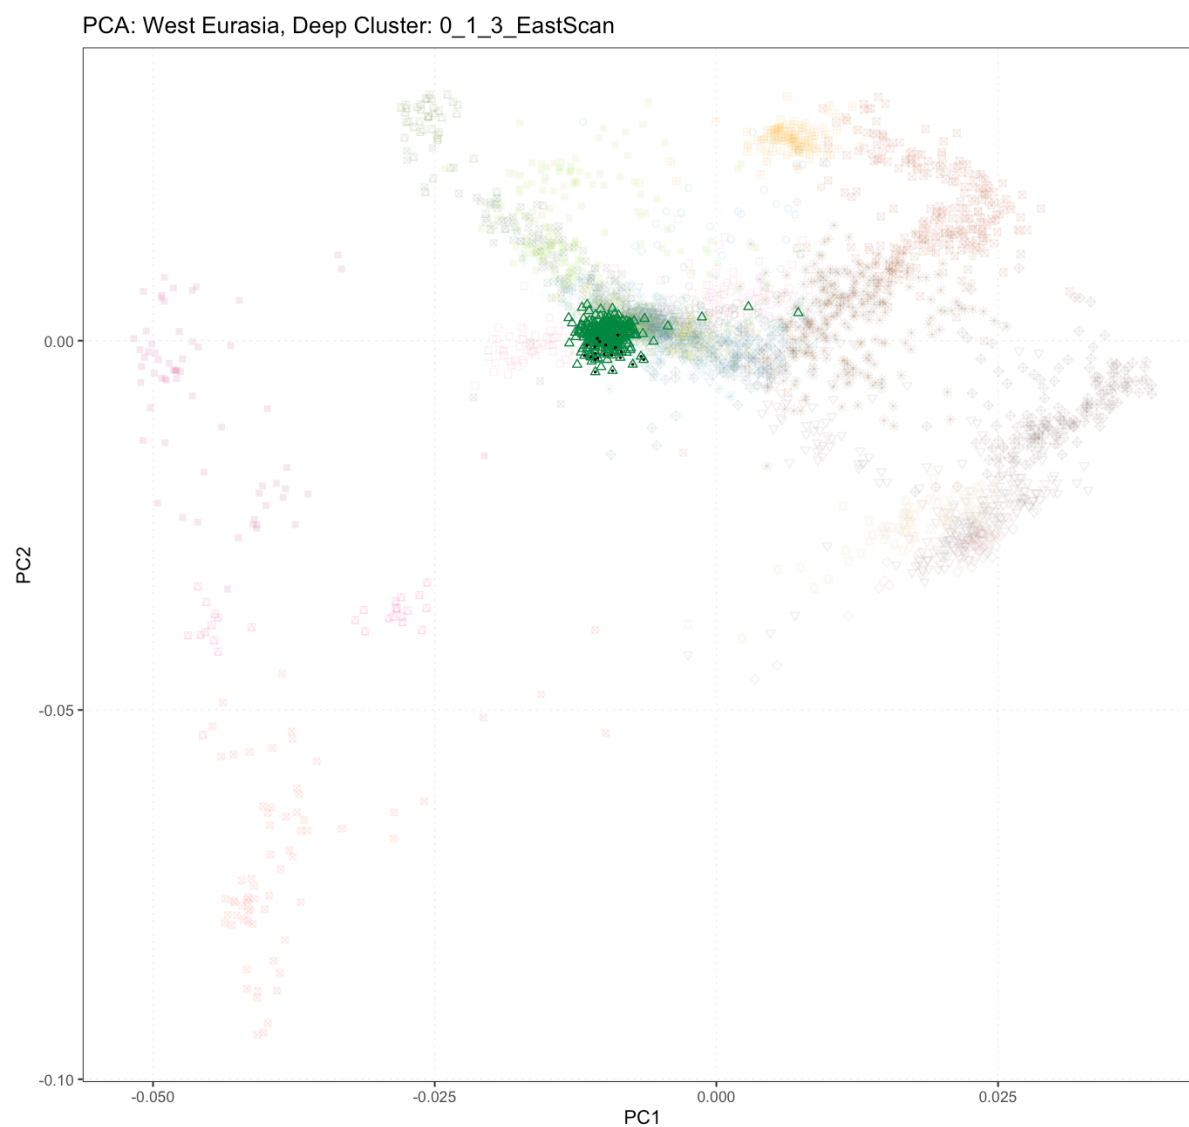

566  
 567 Figure S6.1.7. Western Eurasian PCA highlighting the Eastern Scandinavian subcluster of the  
 568 Corded Ware (North) cluster. Individuals older than 2800 BP are indicated with a ‘.’  
 569

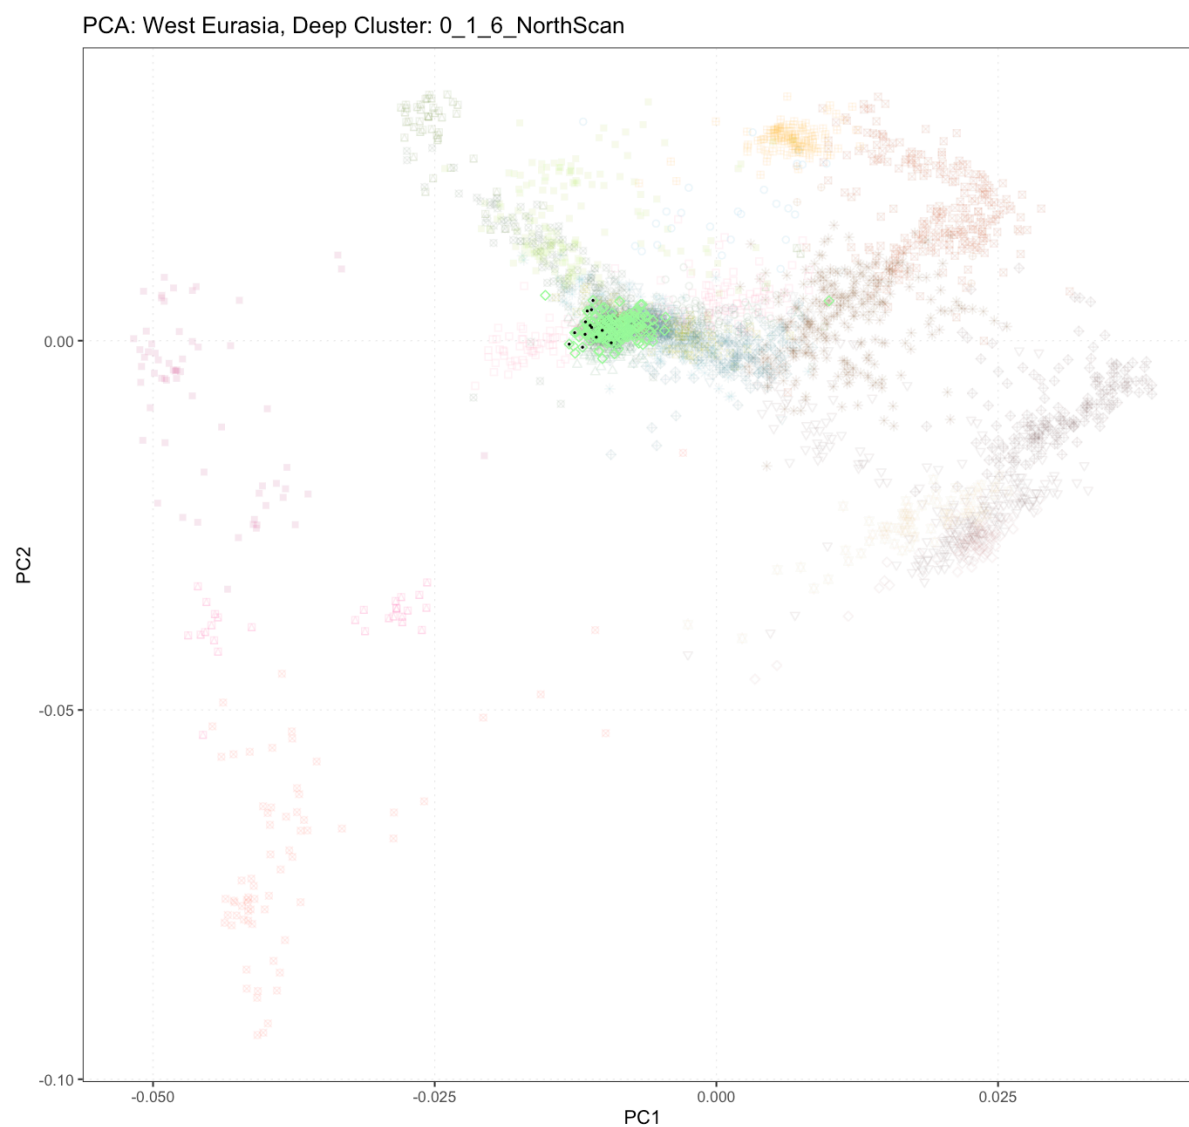

570

571 Figure S6.1.8 Western Eurasian PCA highlighting the Western Scandinavian subcluster of the  
572 Corded Ware (North) cluster. Individuals older than 2800 BP are indicated with a ‘.’

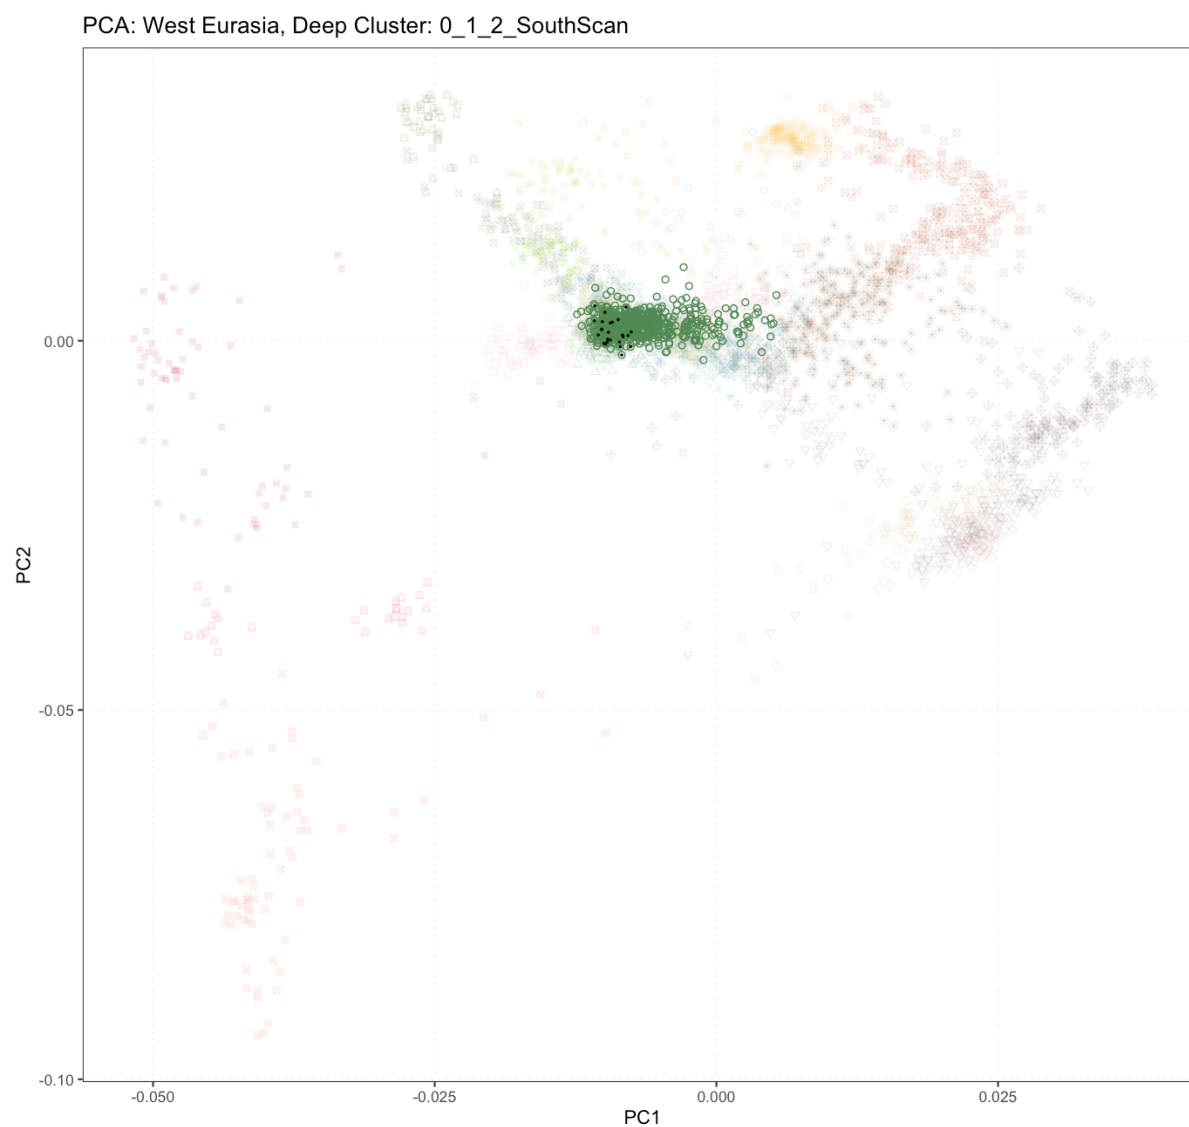

Figure S6.1.9. Western Eurasian PCA highlighting the Southern Scandinavian subcluster of the Corded Ware (North) cluster. Individuals older than 2800 BP are indicated with a ‘.’



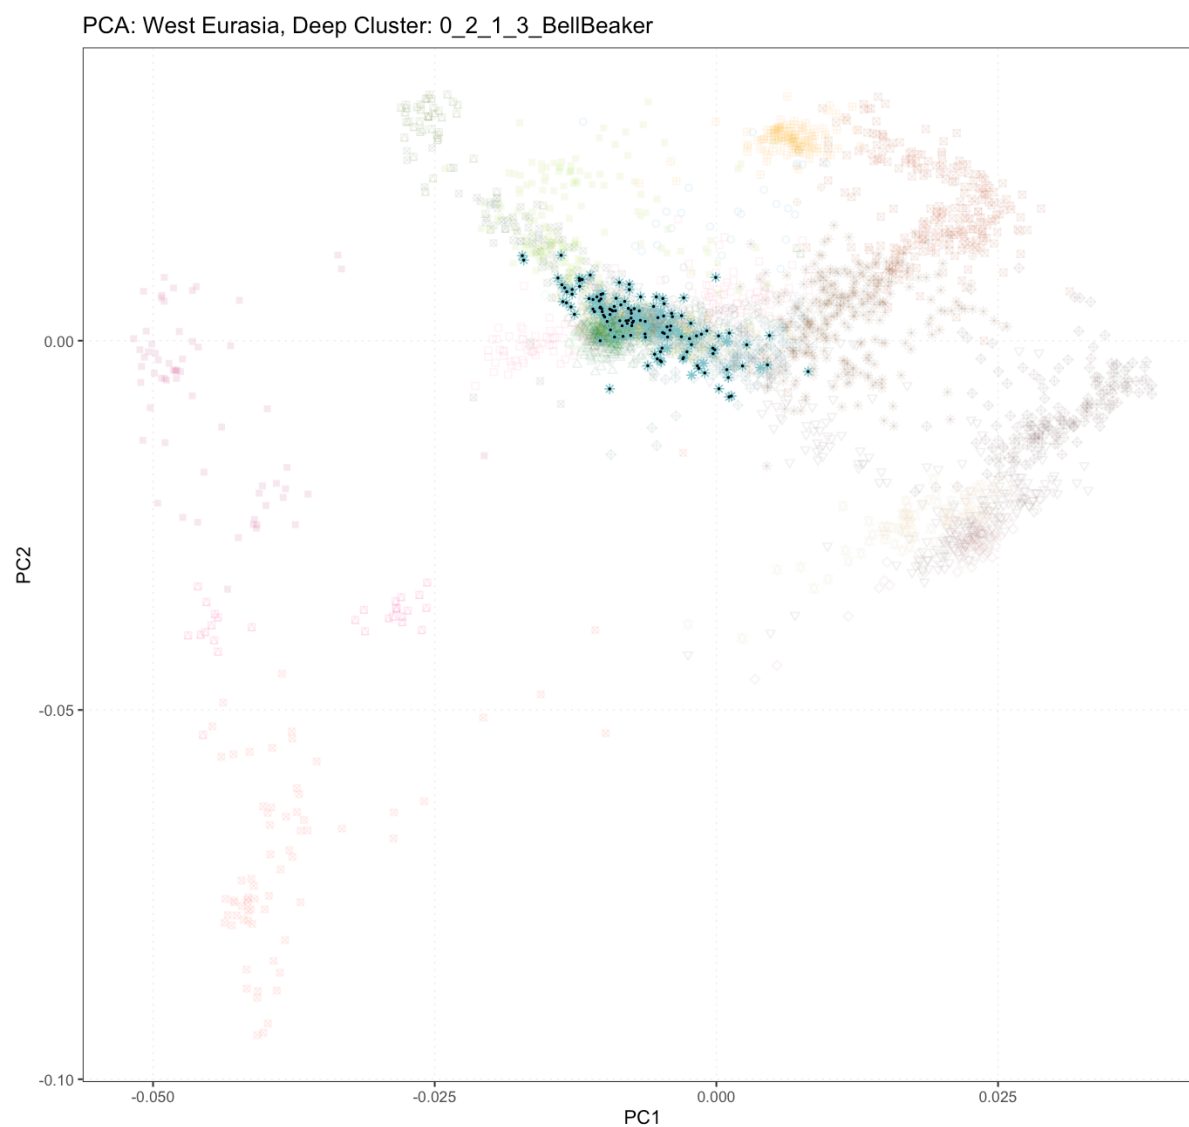

579

580 Figure S6.1.10. Western Eurasian PCA highlighting the Early Bell Beaker subcluster of the  
581 Bell Beaker cluster. Individuals older than 2800 BP are indicated with a ‘.’

582

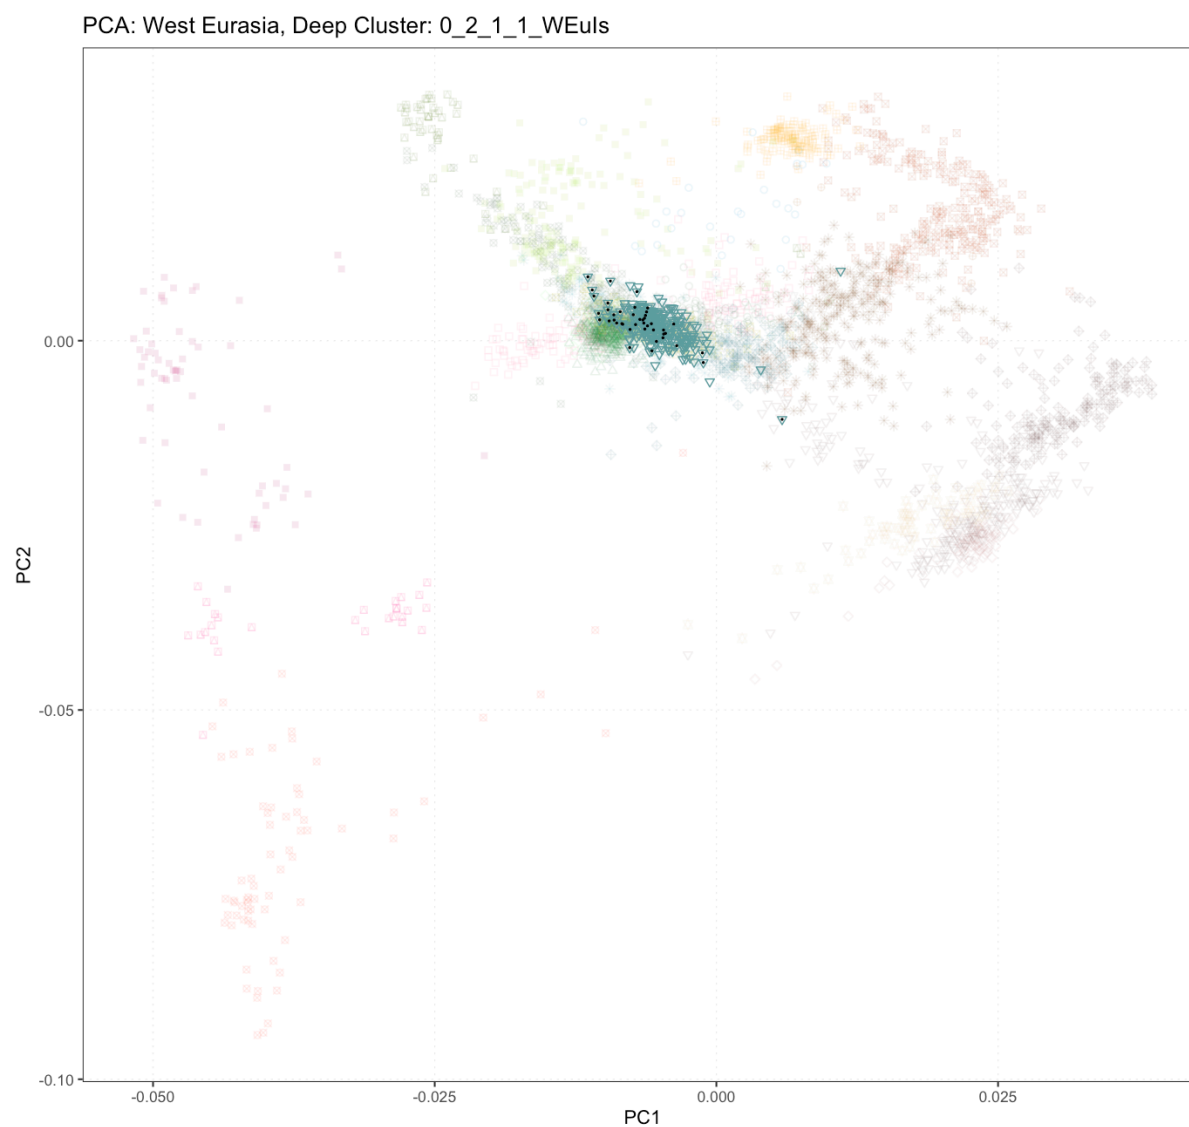

583  
 584 Figure S6.1.11. Western Eurasian PCA highlighting the *Western European Insular BellBeakers*  
 585 subcluster of the Bell Beaker cluster. Individuals older than 2800 BP are indicated with a ‘.’

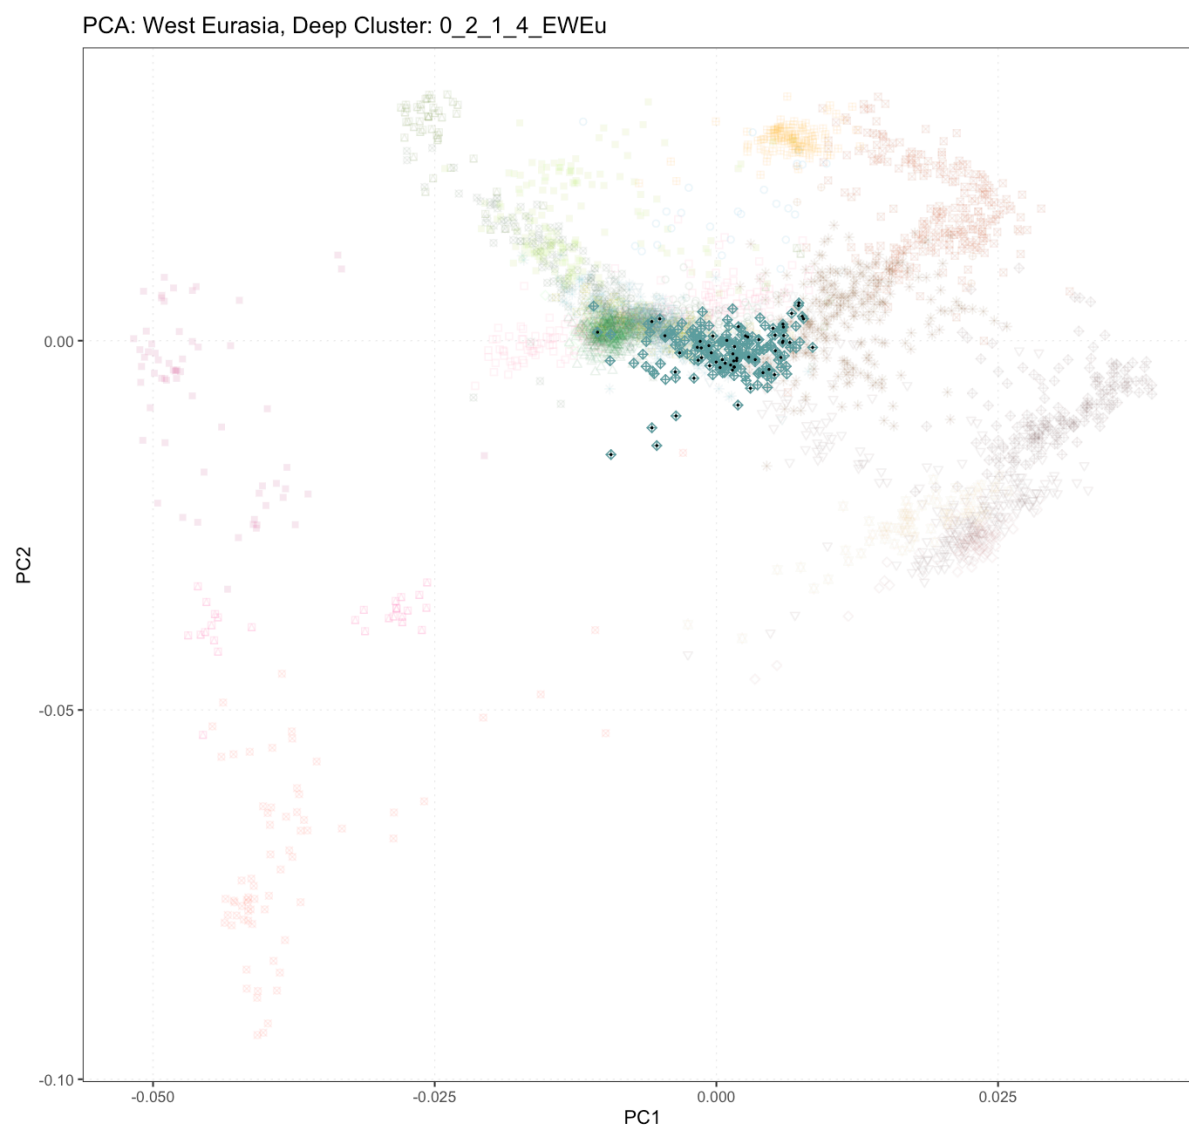

586

587 Figure S6.1.12. Western Eurasian PCA highlighting the *Hallstatt / La Tene Bell Beakers*

588 subcluster of the Bell Beaker cluster. Individuals older than 2800 BP are indicated with a ‘.’

589

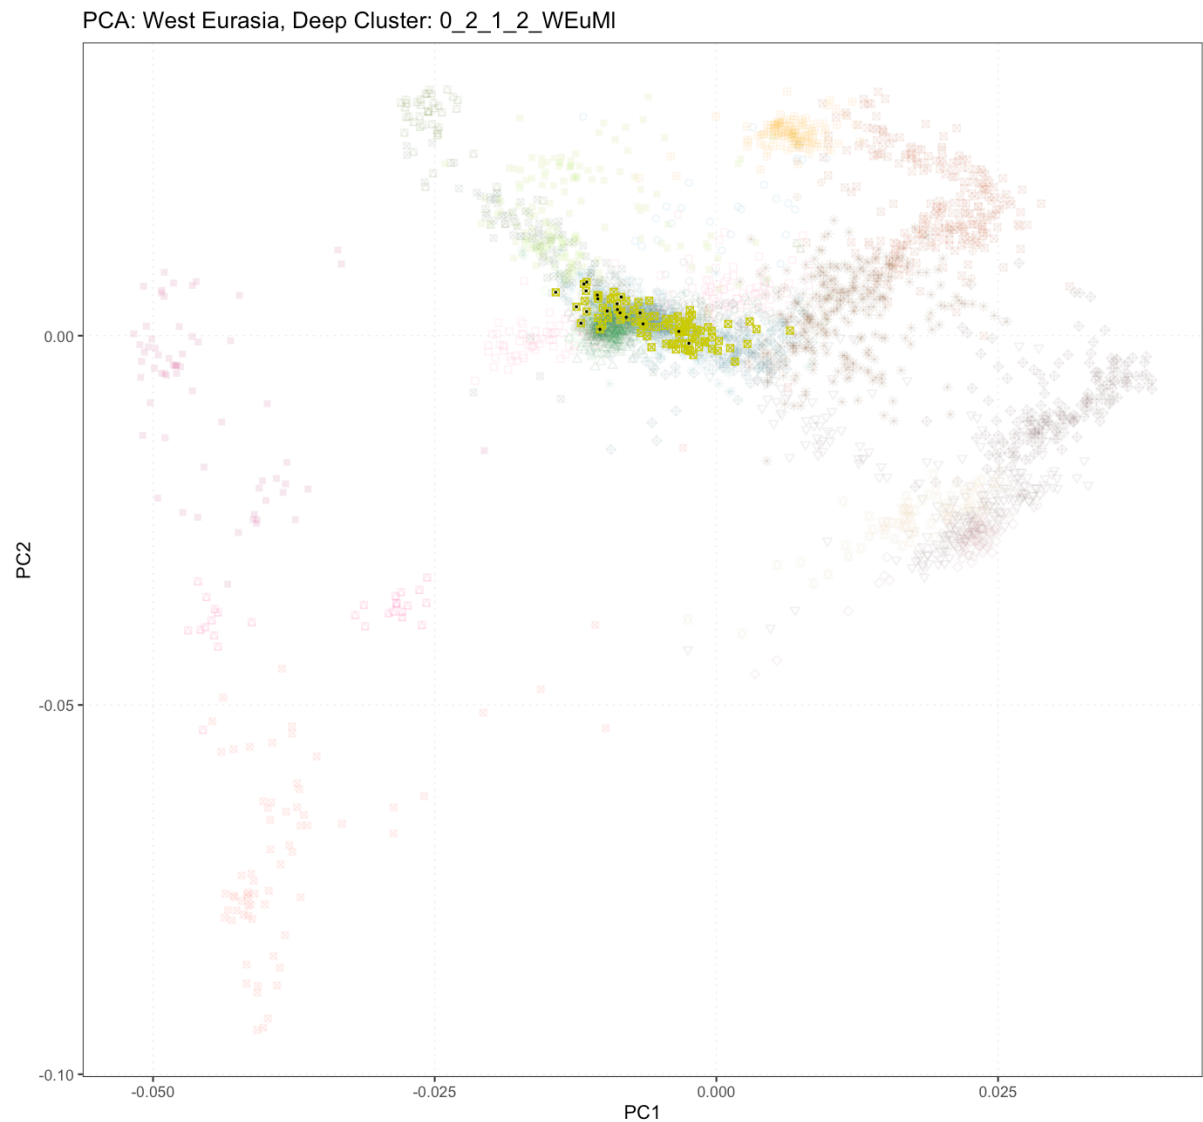

Figure S6.1.13. Western Eurasian PCA highlighting the *Eastern Northern Sea Bell Beakers* subcluster of the Bell Beaker cluster. Individuals older than 2800 BP are indicated with a ‘v’

## S6.2. IBD Clustering

### S6.2.1. Whole Datasets Clustering

To identify IBD segments, we ran IBDseq (Browning and Browning, 2013) on the imputed panel. We removed any segments less than 2cM and any hotspot regions with excess sharing across all individuals, as described in (Allentoft, Sikora, Refoyo-Martínez, *et al.*, 2024). For all pairs, the total shared IBD length was summed and number of IBD segments counted. We excluded any pairs sharing less than a total of 5cM, and the lowest coverage of any pair sharing

more than 1500 cM and had less than 150 segments, to avoid the formation of small clusters with only 1st and 2nd degree relatives. We then performed a network-based hierarchical clustering based on total shared IBD lengths (Greenbaum *et al.*, 2019), as described in (Allentoft, Sikora, Refoyo-Martínez, *et al.*, 2024).

By plotting the deepest clusters on a map (Figure S6.2.1.4) and creating Sankey diagrams showing the relation between clusters and regions (Figure S6.2.1.1, S6.2.1.2, S6.2.1.3), and looking at IBD mixture modelling results faceted by cluster (Figure S6.5.2), clear patterns are apparent.

- Cluster 0\_1 and subclusters (indicated by 0\_1\_x...)
  - high Steppe Ancestry and some [Globular Amphora Culture \(GAC\)](#) ancestry
  - found in Northern Europe
  - associated with the Corded Ware Culture.
- Cluster 0\_2\_1 and subclusters
  - high Steppe Ancestry and some GAC ancestry and varying amounts of European Farmer ancestry
  - found in Western Europe,
  - associated with Bell Beaker contexts.
- Cluster 0\_2\_3 and subclusters
  - highest Steppe Ancestry, including Yamnaya, found in Western Eurasia
- Cluster 0\_3 and subclusters
  - from across Asia and the Americas
- Cluster 0\_4 and subclusters
  - high Neolithic Farming ancestry
- Cluster 0\_5 and sub clusters
  - Eastern and Western Hunter gatherer ancestry

From 5000 - 1575 BP, the Northern Corded Ware cluster was restricted primarily to Northern Europe, and the Bell Beaker cluster to Western Europe (Figure S6.2.1.1). From 1575 BP onwards the Northern Corded Ware cluster was more widespread. By using more fine scale clusters (Figure S6.2.1.2), it is apparent this spread is primarily by the Southern Scandinavian cluster. When replacing regions with countries (Figure S6.2.1.3), the widespread appearance

635 of Southern Scandinavian in England, Germany, and the Netherlands, is apparent. From 5000-  
636 2800 BP, individuals from these countries were primarily from Bell Beaker-related clusters.

637

638

639

640

641

642

Sankey Figure showing relationship between deep clusters and region  
Samples dated between 15000 and 5000 BP

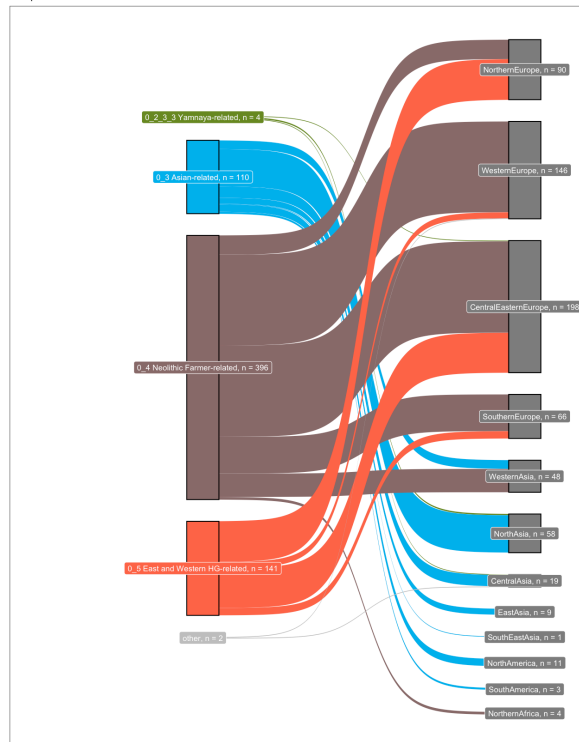

Sankey Figure showing relationship between deep clusters and region  
Samples dated between 5000 and 2800 BP

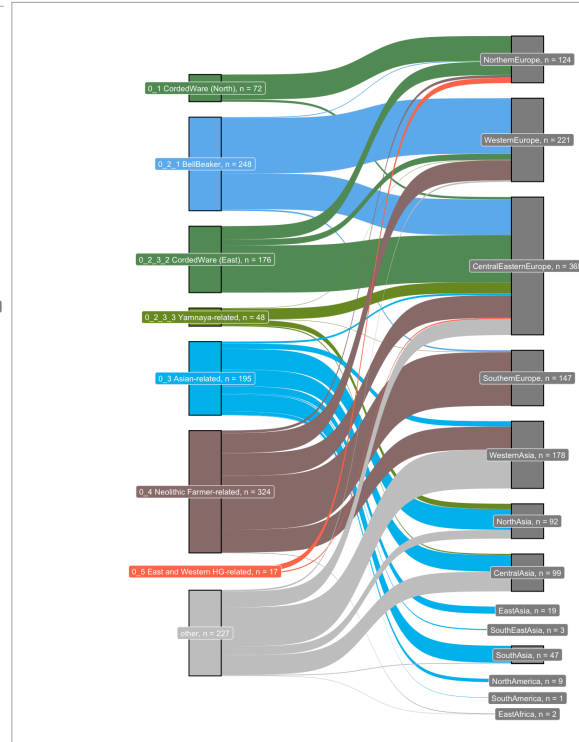

Sankey Figure showing relationship between deep clusters and region  
Samples dated between 2800 and 1575 BP

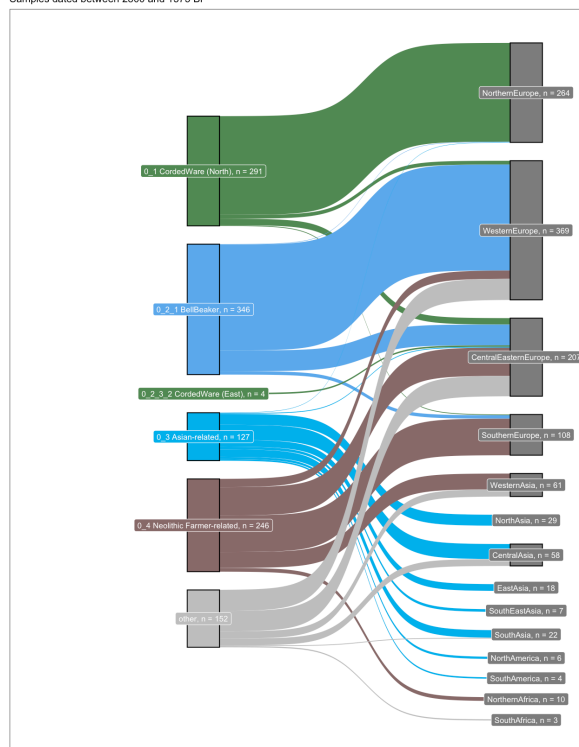

Sankey Figure showing relationship between deep clusters and region  
Samples dated between 1575 and 0 BP

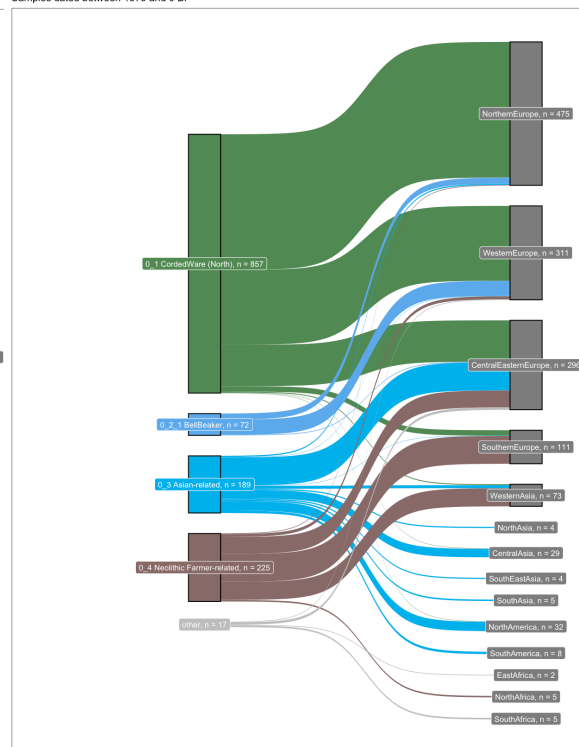

Figure S6.2.1.1. Sankey diagram showing the relationship between the deepest IBD clusters and geographical regions around the world, in different time bins (15000 - 5000 BP, 5000 - 2800 BP, 2800 - 1575 BP, 1575 - 0 BP)

649  
650  
651  
652

Sankey Figure showing relationship between deep clusters and region  
Samples dated between 15000 and 5000 BP

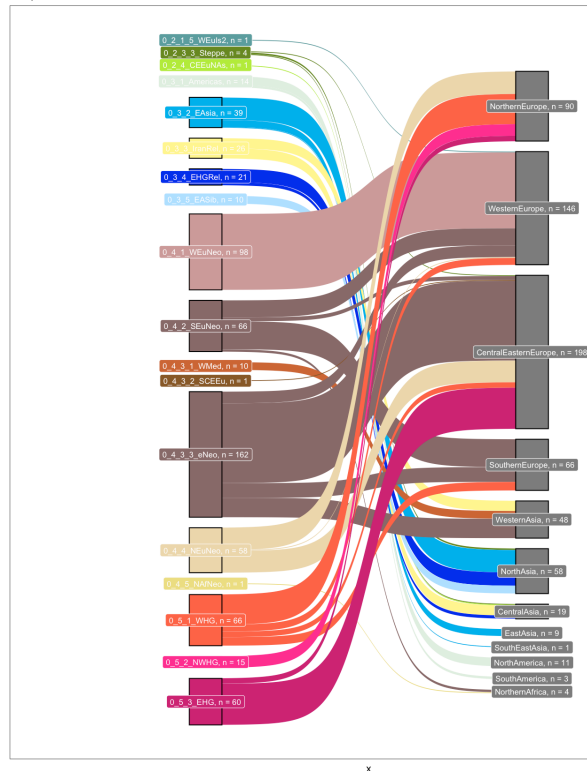

Sankey Figure showing relationship between deep clusters and region  
Samples dated between 5000 and 2800 BP

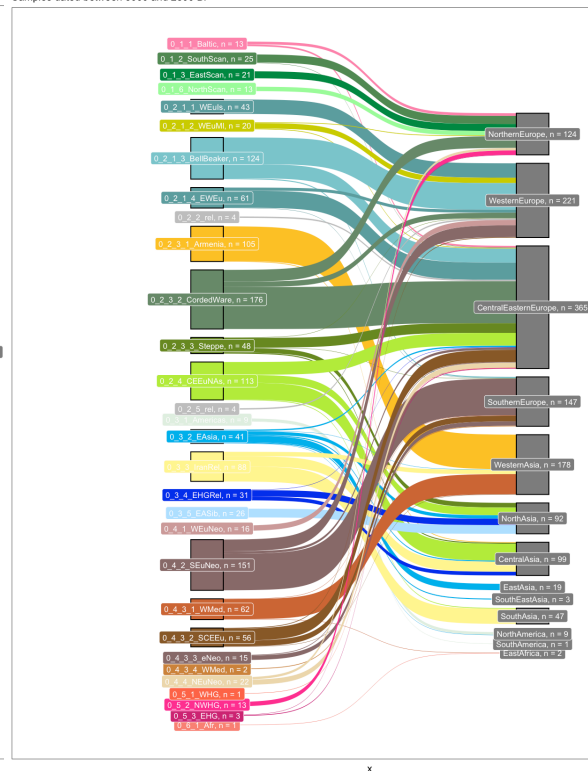

653

Sankey Figure showing relationship between deep clusters and region  
Samples dated between 2800 and 1575 BP

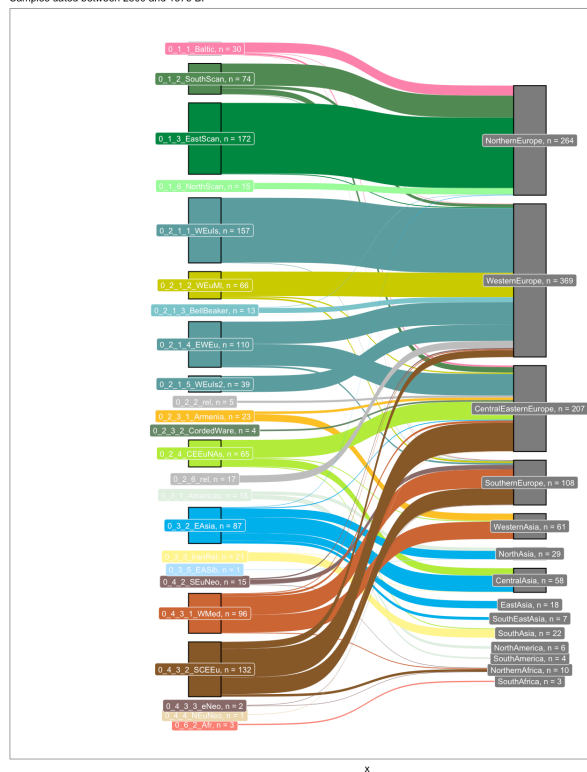

Sankey Figure showing relationship between deep clusters and region  
Samples dated between 1575 and 0 BP

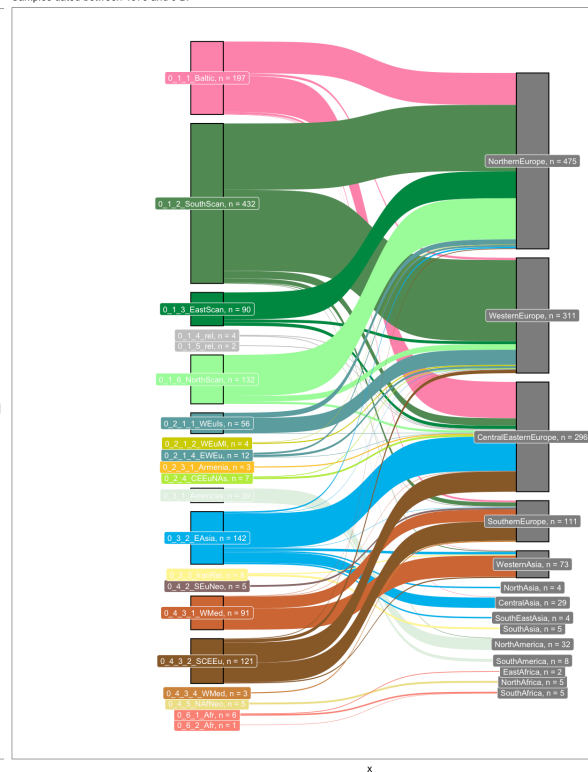

654



655

656

657

658

659 Figure S6.2.1.2. Sankey diagram showing the relationship between the deep IBD clusters and  
660 geographical regions around the world, in different time bins (15000 - 5000 BP, 5000 - 2800  
661 BP, 2800 - 1575 BP, 1575 - 0 BP)

662

663

Sankey Figure showing relationship between deep clusters and country  
 Samples dated between 15000 and 5000 BP

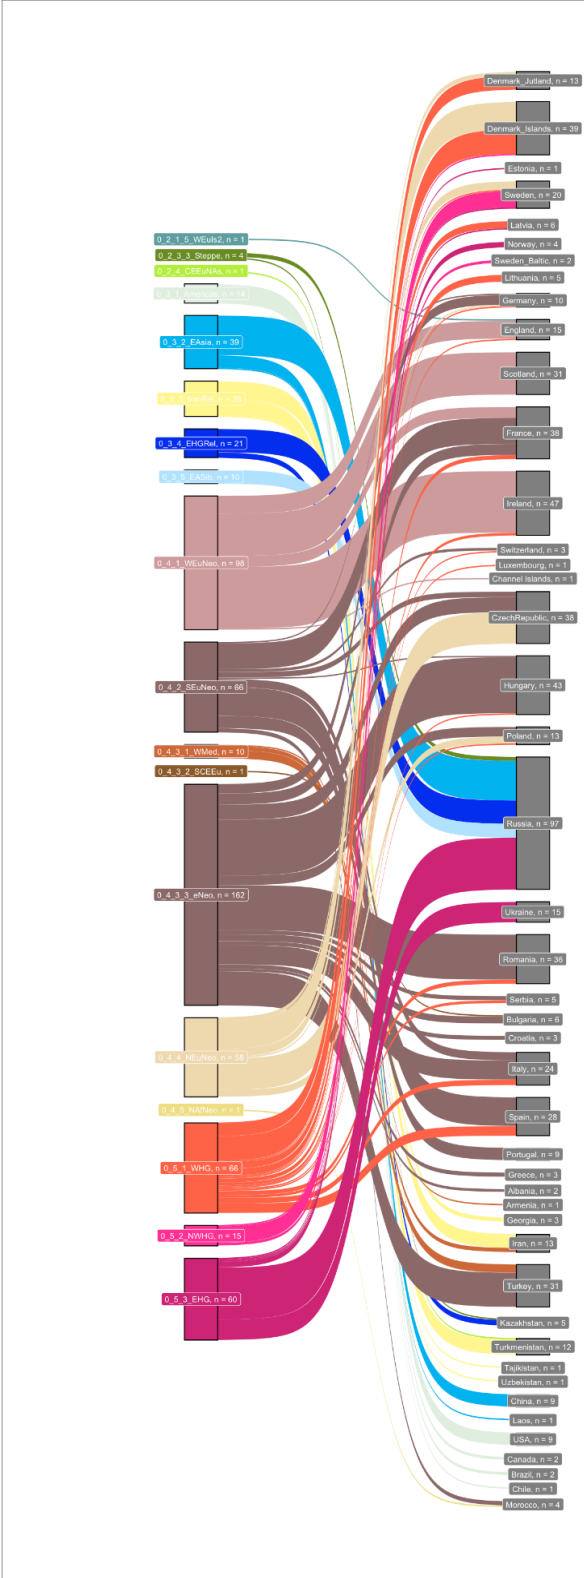

Sankey Figure showing relationship between deep clusters and country  
 Samples dated between 5000 and 2800 BP

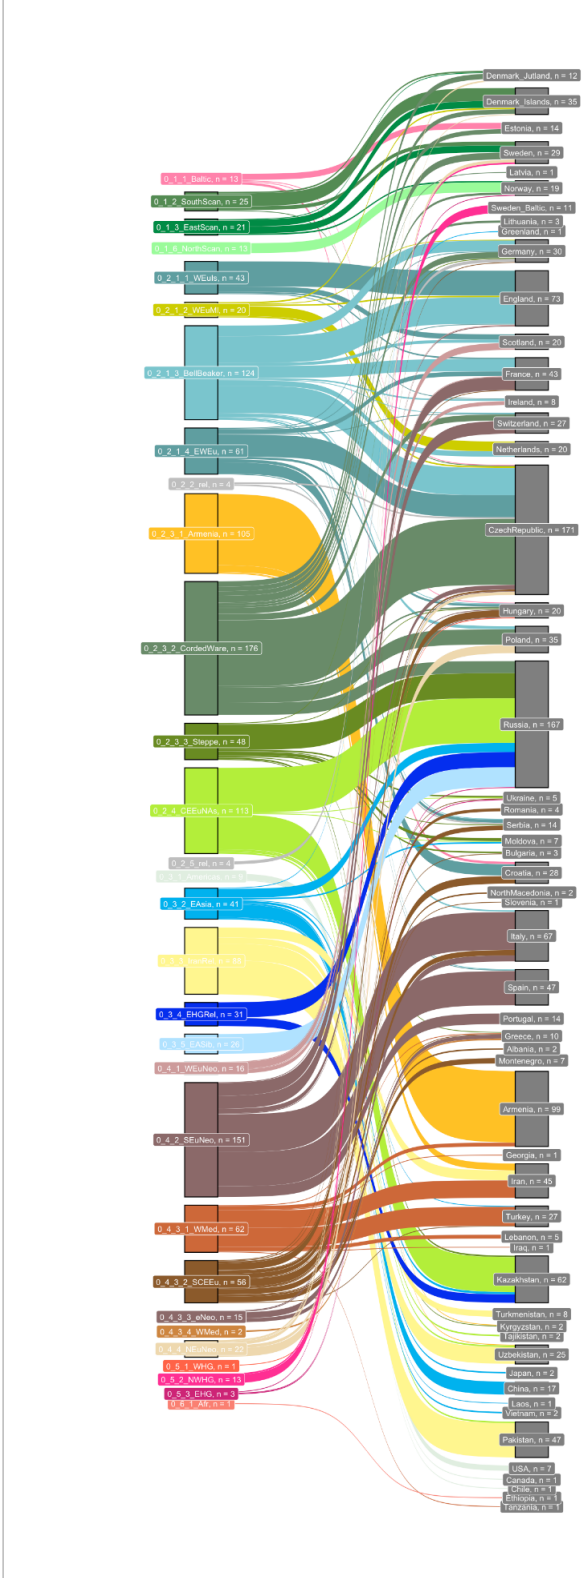

Sankey Figure showing relationship between deep clusters and country  
Samples dated between 2800 and 1575 BP

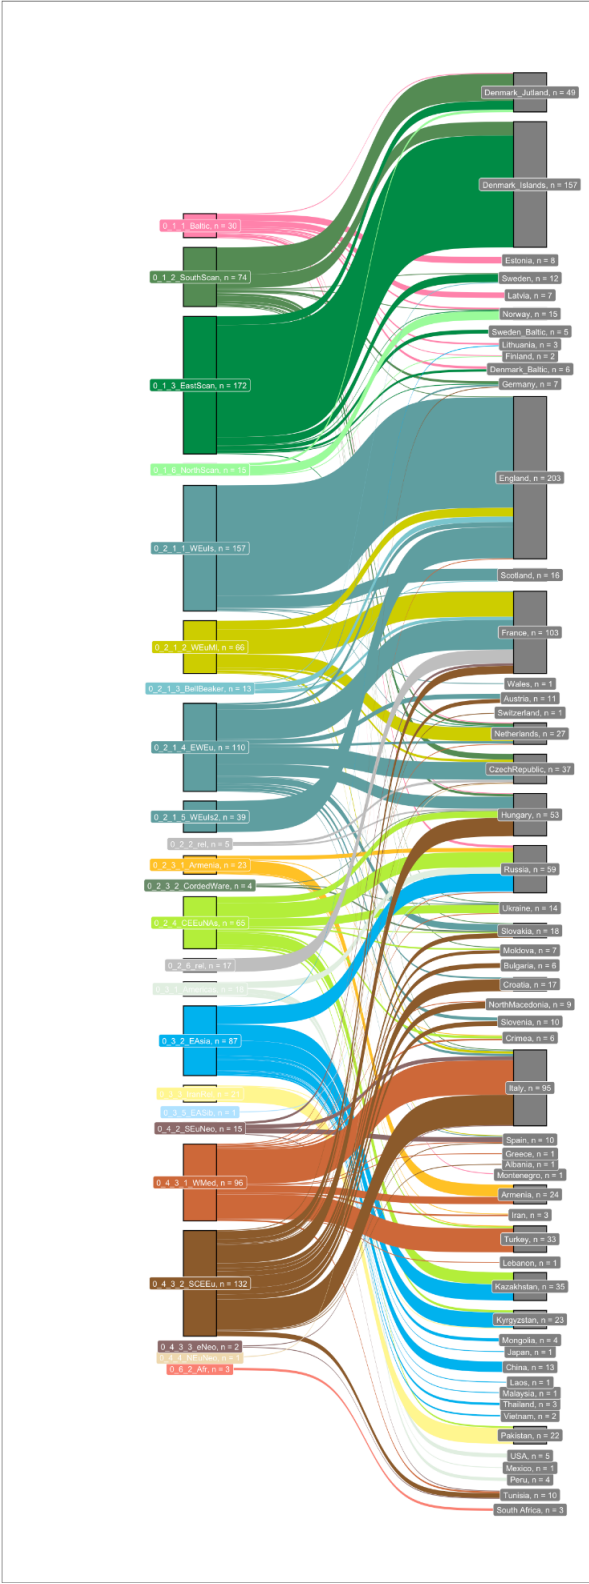

Sankey Figure showing relationship between deep clusters and country  
Samples dated between 1575 and 0 BP

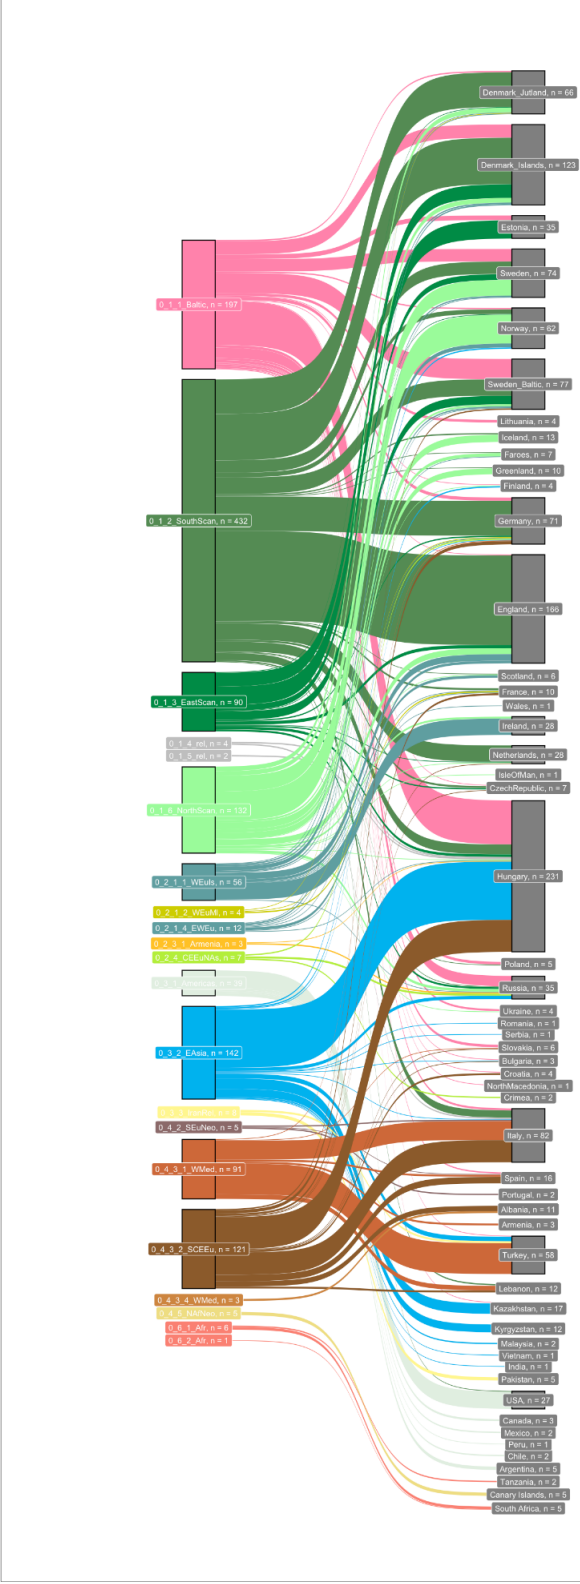

Figure S6.2.1.3. Sankey diagram showing the relationship between the deepest IBD clusters and countries around the world, in different time bins (15000 - 5000 BP, 5000 - 2800 BP, 2800 - 1575 BP, 1575 - 0 BP)

---

PDF UPLOADED SEPARATELY

---

Figure S6.2.1.4. Plots showing deep clusters plotted across Western Eurasia

#### S6.2.2. 2800 + Datasets Clustering

Although the clustering represents genetic structure that corresponds to specific regions and times, basing results on the relationship between sub-clusters alone can be misleading. For example, the 0\_1\_6 Western Scandinavian cluster contains a series of subclusters, predominantly of Norwegian samples from the Bronze to the Viking Period. However, by using a set of sources including Bronze Age Western and Eastern Scandinavians source clusters, we find that the late Bronze Age Norwegian individuals are modelled as ~50% Eastern - 50% Western Scandinavian. By the Iron Age, most individuals are modelled with <10% Western Scandinavian and >90% Eastern Scandinavian ancestry, despite all falling within the 0\_1\_6 Western Scandinavian broader cluster. When using the late Bronze Age Western Scandinavians (modelled as 50% Western Scandinavian) as a source, we find the model 50% of the ancestry of the later Iron Age, which appears to create the link joining the clusters (Figure S6.2.2.1).

By excluding all individuals less dated to less than 2800BP (pre2.8k) and reclustering the dataset as in S6.2.1, we are able to identify the Bronze Age population structure without the impact of later admixture (Table S3, Figure S6.2.2.4). In the case of the Bronze Age Norwegians, we find in the pre2.8k reclustering they form a cluster together with the earliest



*Iron Age and Viking Individuals ancestry, including those that were modelled with no early  
Bronze Age ancestry. 'S' indicates a source individual.  
(B)*

---

PDF UPLOADED SEPARATELY

---

Figure S6.2.2.2. Full plot for Figure S6.2.2.1A, showing all source and target individuals

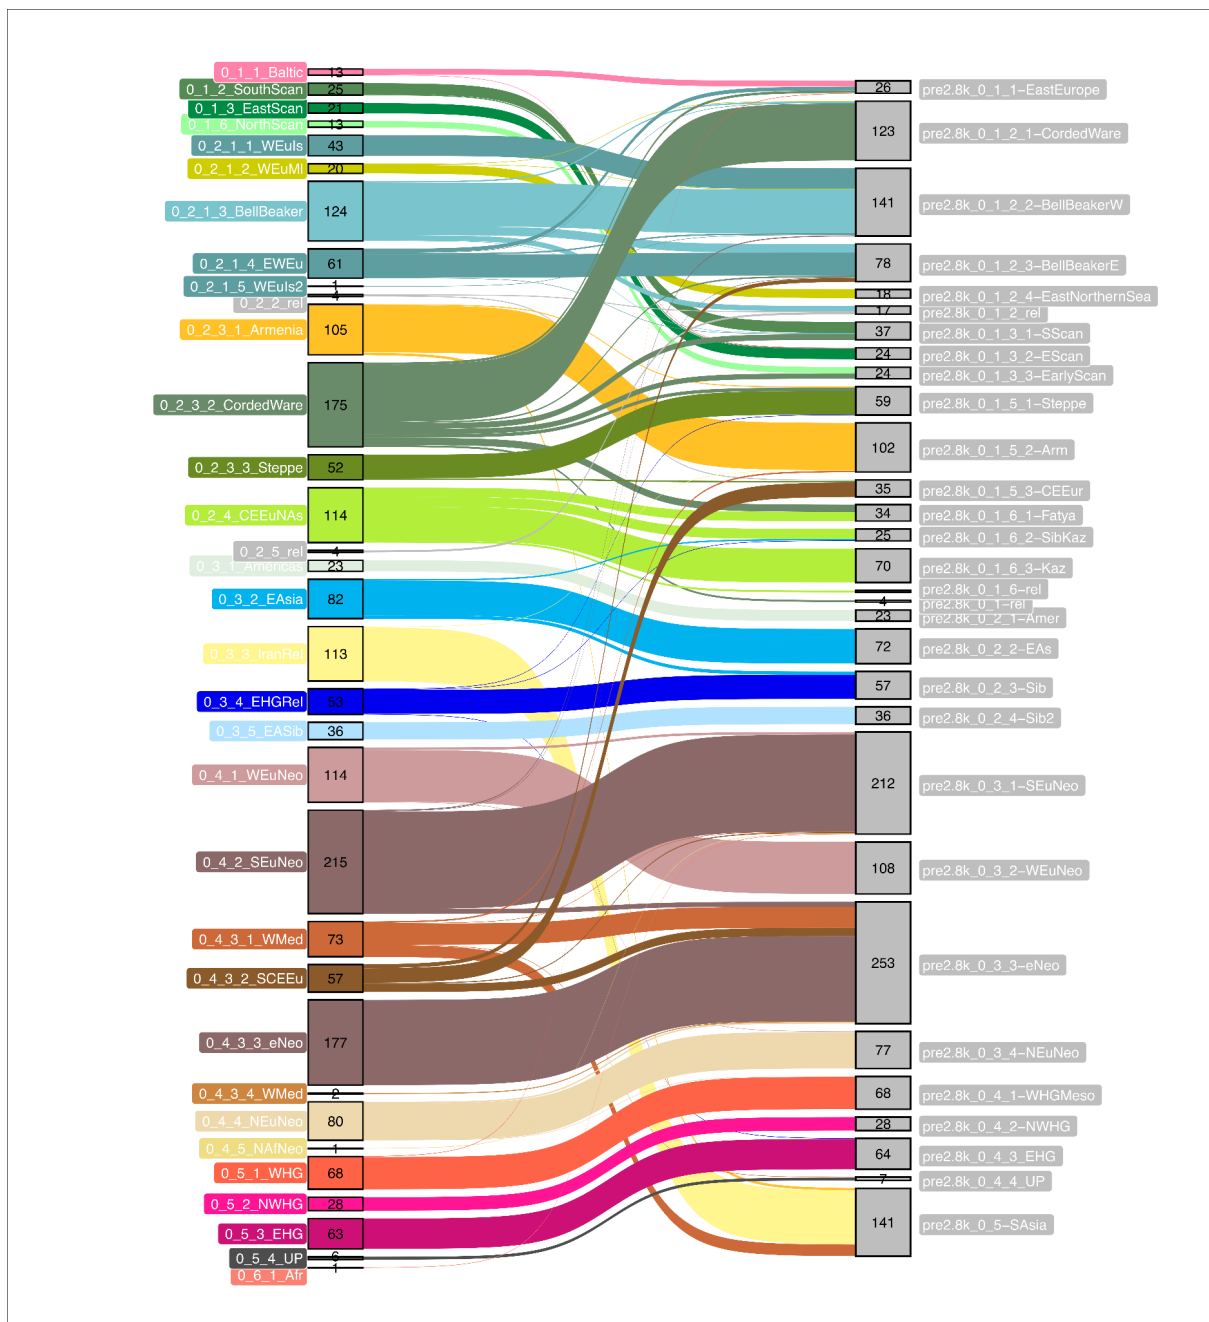

Figure S6.2.2.3. Sankey diagram showing relationship between full clustering (left) and pre2.8k clustering (right).



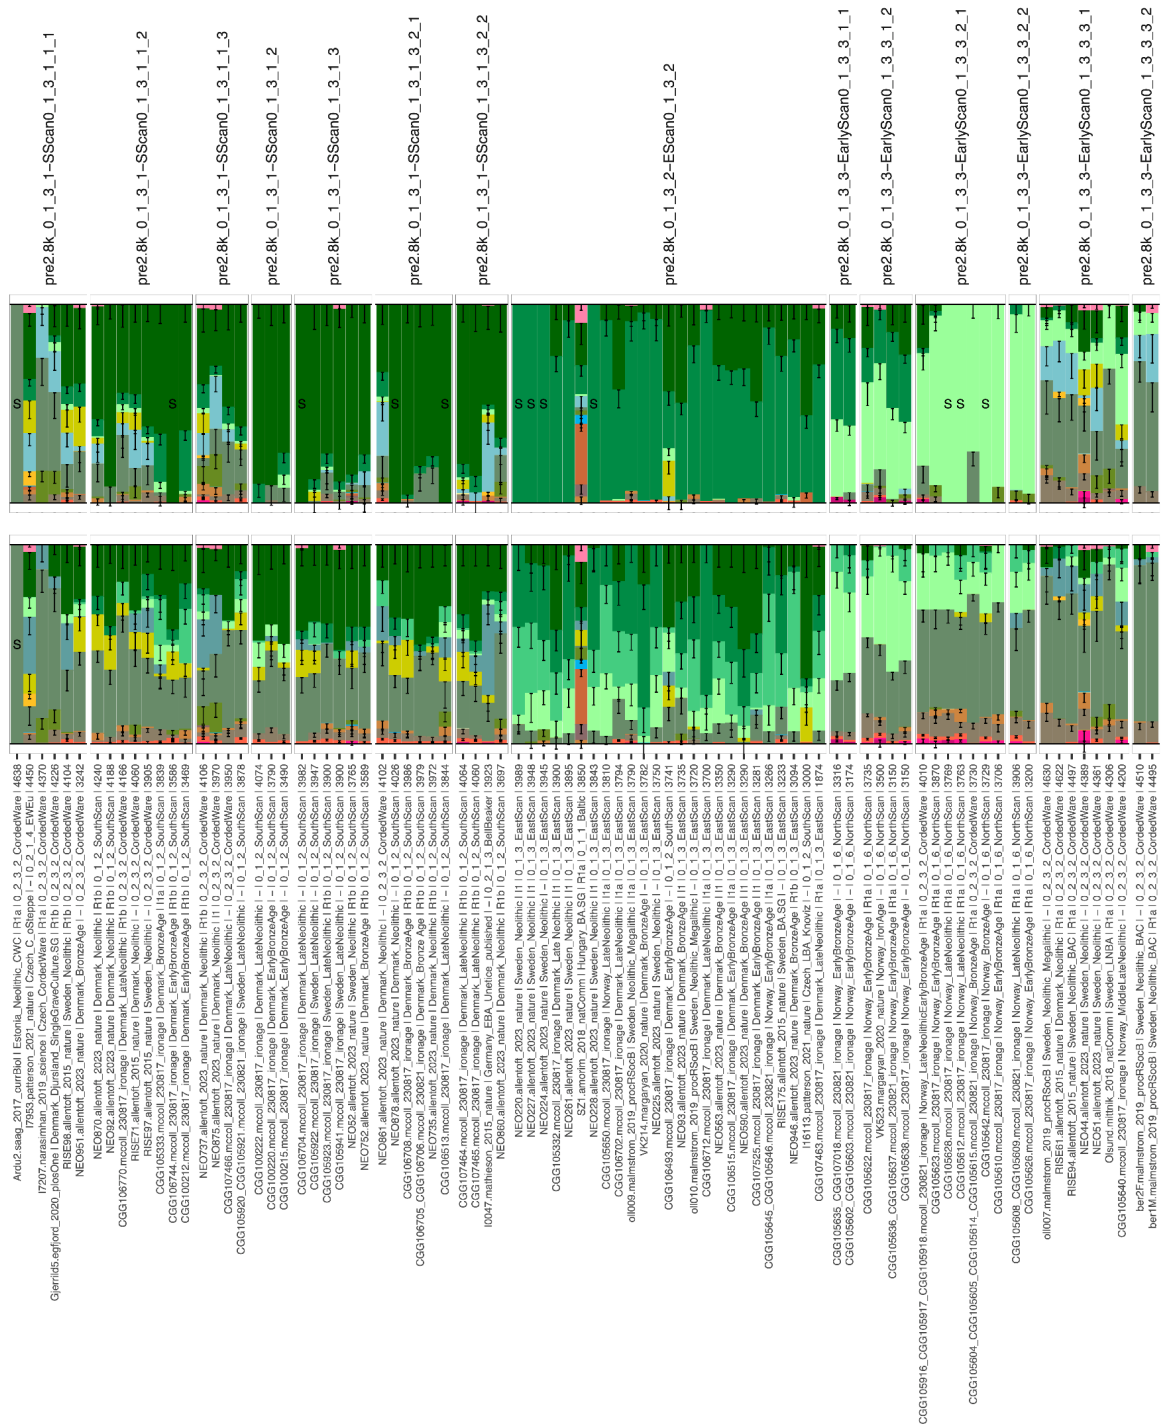

Figure S6.2.2.4. Mixture Modelling Results for Set 6 (upper panel, includes Bronze Age Scandinavian sources) and Set (lower panel, contains Iron Age Scandinavian Sources). Samples are faceted on pre-2800 BP clusters, and the original cluster information is provided in the sample label. Samples that were originally in the Corded Ware cluster are modelled with high proportions of Corded Ware, Bell Beaker and ENS Ancestry, and only small proportions of the local (Western Scandinavian, Southern Scandinavian) ancestries.



741

## 742 S6.3. IBD Mixture Modelling.

### 743 S6.3.1. Main Mixture Modelling Sets

744 For IBD Mixture Modelling we calculated total shared IBD lengths as in S6.2, but with a  
745 minimal cut off of 1 cM per segment, and no lower limit on the total shared length. We  
746 undertook mixture modelling (Hofmanová *et al.*, 2016) on the total shared IBD lengths as  
747 described in (Allentoft, Sikora, Refoyo-Martínez, *et al.*, 2024), starting with the well-  
748 established diverse ancestries across Eurasia and adding more proximal sources (Table S4).  
749 These results were plotted as ‘ADMIXTURE’ style bar charts faceted by regions and country  
750 (Figure S6.3.1.1), by IBD Cluster (Figure S6.3.1.2) and on the Western Eurasian PCA (Figure  
751 S6.3.1.3).

752

753 The following 8 sets were used. For each set, increasingly proximal sources are added. The full  
754 list of source individuals can be found in Table S4 and Figure S6.3.1.5.

755

#### 756 Set 1\_base\_ehg-swap

757 The initial set included representatives of the four major ancestries present in Bronze Age  
758 Europe: Early Anatolian Farmers, Caucasus Hunter Gatherers, Western Hunter Gatherers from  
759 Southern Europe and Ukrainian Eastern Hunter Gatherers. In addition, we included more  
760 distant source clusters, who are known to impact Western Eurasia from the Iron Age onwards:  
761 Russian Eastern Hunter Gatherers, East Asian, Iran Neolithic and South Africans.

762

#### 763 Set 2\_base\_ehg-swap\_w\_LHG\_wNHG\_rmBBFarm

764 In addition to the clusters from Set 1, the second set included additional Mesolithic hunter-  
765 gatherers from along the Western Hunter Gatherer - Eastern Hunter Gatherer cline, to detect  
766 variation in hunter-gatherer ancestries in Bronze Age population. These included one cluster  
767 from Latvia and Lithuania, and a second from Norway).

768

#### 769 Set 3\_base\_wYam\_ehg-swap\_w\_LHG\_wNHG\_rmBBFarm

770 Set 3 is identical to Set 2, but includes Yamanya as a source, who were previously modelled as  
771 CHG and EHG.

772

773 Set 4\_base\_wYam\_ehg-swap\_w\_LHG\_wNHG\_rmBBFarm\_wGACStH\_wCWC

774 Set 4 is identical to Set 3, but includes three clusters with farming related ancestry, representing  
775 known admixture events in Europe. The first cluster contains early European Farmers, here  
776 modelled as a mixture of early Anatolian Farmers and WHG ancestry. The second cluster  
777 contains Globular Amphora Culture (GAC) individuals, who carry some EHG ancestry similar  
778 to that of Yamnaya. A third cluster contains Bronze Age Anatolians, distinct from the early  
779 Anatolians in their additional CHG ancestry. Almost all Bronze Age and later Europeans carry  
780 GAC ancestry, whereas European Farmer ancestry is widespread in South and Western Europe,  
781 but not in the North.

782

783 Set 5\_base\_wYam\_ehg-swap\_w\_LHG\_wNHG\_rmBBFarm\_wBBCWGACStH\_wCWC

784 Set 5 is identical to set 4, but contains two additional clusters representing the major two  
785 archaeological cultures of the Bronze Age - Corded Ware ancestry and BellBeaker ancestry.

786

787 Set 6\_base\_wYam\_ehg-swap\_Glb3\_rmBBFarm

788 Set 6 is similar to the set 5, except the hunter-gatherer sources from set 2 have been removed.  
789 In addition, clusters related to various West and Northern European Bronze Age clusters have  
790 been added, a Bronze Age Southern Scandinavian cluster (0\_1\_2\_SouthScan), and Bronze Age  
791 Eastern Scandinavian Cluster (0\_1\_3\_EastScan), a Bronze Age Western Scandinavia cluster  
792 (0\_1\_6\_NorthScan), and Bronze Age Baltic Cluster (0\_1\_1\_Baltic), and a Bronze Age East  
793 North Sea cluster (0\_2\_1\_2\_WEuM).

794

795 Set 7\_base\_wYam\_ehg-swap\_ScIA\_wStH

796 Set 7 is similar to Set 6, but now contains Iron Age Southern Scandinavians from Western  
797 Denmark (0\_1\_2\_3\_2800-), Iron Age Eastern Scandinavians from East Denmark  
798 (0\_1\_3\_1\_2\_2\_2800-), Iron Age Eastern Scandinavians from Southern Sweden  
799 (0\_1\_3\_2\_2800-), Iron Age Western Scandinavians from Norway (0\_1\_6\_2\_2800-) and Iron  
800 Age East North Sea individuals from the Netherlands (0\_2\_1\_2\_2\_2800-)

801

802 Set 8\_base\_wYam\_ehg-swap\_ScIA\_wStH\_wGmN

803 Set 8 is similar to set 7, but includes a second more southern Iron Age Southern Scandinavian  
804 cluster from Northern Germany.

805

806

807  
808  
809  
810  
811  
812  
813  
814  
815  
816  
817  
818  
819  
820  
821  
822  
823  
824  
825  
826  
827  
828  
829  
830  
831  
832  
833  
834  
835  
836  
837

---

PDF UPLOADED SEPARATELY

---

Figure S6.3.1.1.Mixture Modelling Results for all ancient samples, ordered by country

---

PDF UPLOADED SEPARATELY

---

Figure S6.3.1.2.Mixture Modelling Results for all ancient samples, ordered by cluster

---

PDF UPLOADED SEPARATELY

---

Figure S6.3.1.3. Mixture Modelling Results displayed on the Western Eurasian PCA.

---

PDF UPLOADED SEPARATELY

---

Figure S6.3.1.4. Subset from Figure S6.3.1.2, plotting only samples older than 2800 BP

839

841

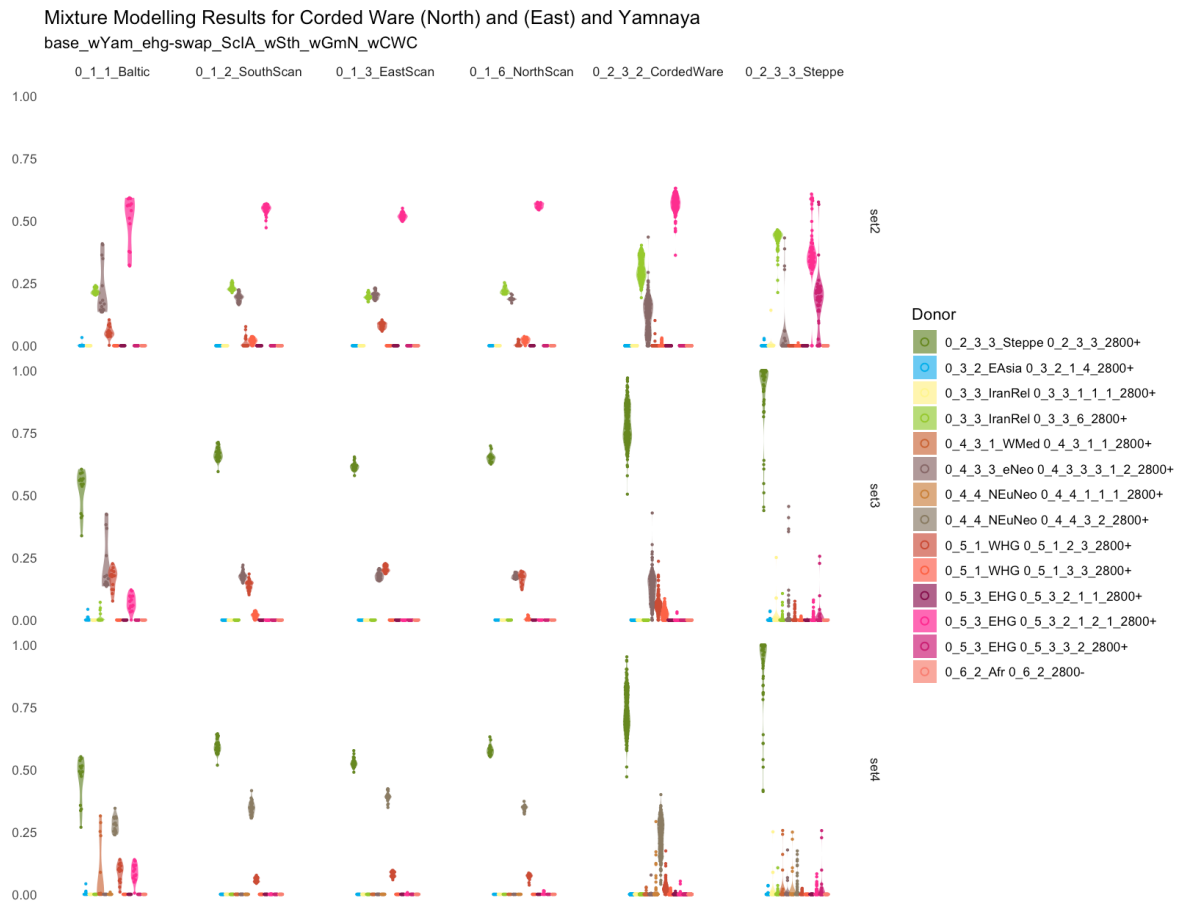

Figure S6.3.1.6. Violin Plots showing subsets of Figure S6.3.1.2 relevant for Corded Ware (East) and (North) clusters, for samples over 2800 BP. Sets 2 and 3 show the variation in ancestry of Western Hunter Gatherer (Southern Europe - 0\_5\_1\_2\_3\_2800+) compared to Northern Western Hunter Gathers (Latvia, Lithuania - 0\_5\_1\_3\_3\_2800+) for Southern, East and Western Scandinavians. Set 3 and 4 show the high Eastern Hunter Gatherer from Ukraine present in the Baltic Cluster. Set 3 shows the Yamnaya - Farmer ancestry cline present in the Corded Ware (East) cluster (0\_2\_3\_3). Set 4 shows this ancestry modelled as GAC (0\_4\_4\_3\_2\_2800+)

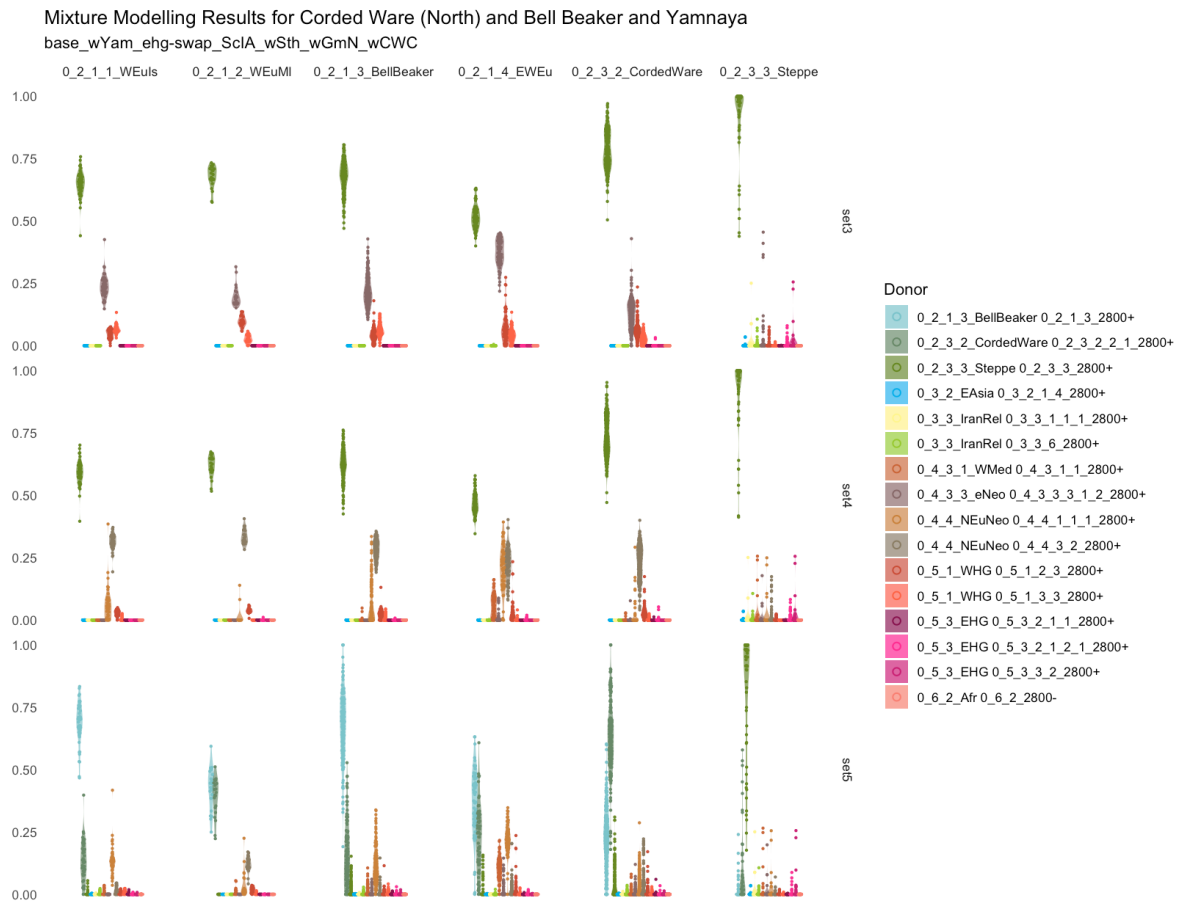

Figure S6.3.1.7. Violin Plots showing subsets of Figure S6.3.1.2 relevant for Corded Ware (East) and Bell Beaker clusters, for samples over 2800 BP. Set 4 shows the European Farmer (0\_4\_4\_1\_1\_1\_2800+) present in most Bell Beakers, in addition to the GAC (0\_4\_4\_3\_2\_2800+) ancestry found in the Corded Ware (East) individuals. Set 5 shows the high proportion of Bell Beaker ancestry relative to Corded Ware ancestry in most individuals. The East North Sea (0\_1\_2\_1\_WEuMI) cluster is unique, in the high proportion of Northern Western Hunter Gatherer (Latvia, Lithuania - 0\_5\_1\_3\_3\_2800+) ancestry, low European Farmer (0\_4\_4\_1\_1\_1\_2800+) ancestry and equal proportion of Bell Beaker and Corded Ware ancestry, reflecting both its geographical position between the two cultures and position in the Western Eurasian PCA space.

Figure S6.3.1.8. Mixture Modelling Results overlaid on a map of Northern Europe for Set 7, including one Southern Scandinavian IA sources.

PDF UPLOADED SEPARATELY

Figure S6.3.1.9. Mixture Modelling Results overlaid on a map of Northern Europe for Set 8, including two Southern Scandinavian IA sources.

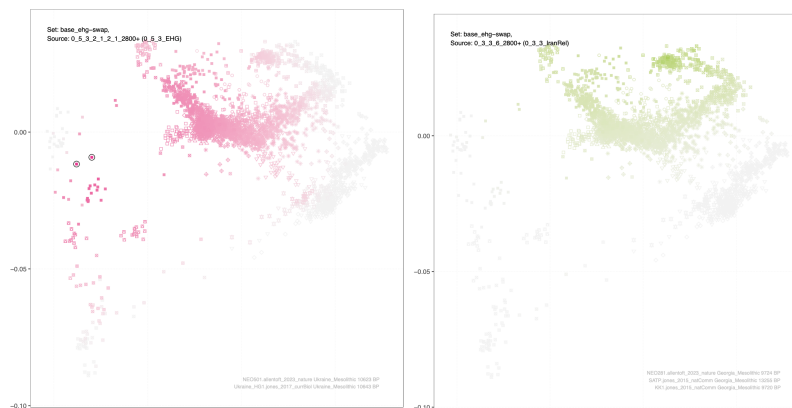

Figure S6.3.1.10. PCA results coloured by Mixture modelling proportions when including more proximal European Steppe-related sources: Eastern Hunter Gatherer (dark green), Caucasus Hunter Gatherer (light green) source clusters (Set 1). Source individuals are circled. Subset of Figure S6.3.1.3

### S6.3.2. Auxiliary Mixture Modelling Sets

The ‘main’ mixture modelling sets were generated with more proximate source clusters added in each set. We also generated a set of auxiliary sets.

Set A1. Similar to main Set 3, except only a single EHG and WHG source cluster are included to demonstrate the WHG - WHG cline (Extended Data Figure 1) . All main sets have additional sources from the EHG - WHG cline. Results in Figure S6.2.2.1.

Set A2. Similar to main Set 6, but with Bronze Age early admixed Eastern and local (Western and Southern) Scandinavians as sources for later Bronze Age individuals. Results in Figure S6.2.2.2.

---

PDF UPLOADED SEPARATELY

---

*Figure S6.3.2.1. Mixture Modelling Results for Set A1.*

---

PDF UPLOADED SEPARATELY

---

*Figure S6.3.2.2. Mixture Modelling Results for Set A2.*

## S6.4. Analysis of uniparental markers

### S6.4.1. Mitochondrial DNA analysis

Mitogenomes of the newly sequenced individuals were reconstructed using bcftools (Li, 2011) call and mpileup from reads mapped to rCRS from which we subsequently classified the haplogroups using haplogrep (Weissensteiner *et al.*, 2016). We then aligned the sequences with mafft (Katoh and Standley, 2013) and generated a phylogenetic tree with the maximum likelihood (ML) based tree inference tool raxML (Kozlov *et al.*, 2019) using under the GTR+I+G4 model with the options [--all --bs-trees 100 ]. The analysis was restricted to only the coding region ranging from 577-16,023 base pairs (bp) (rCRS coordinates).

The phylogenetic analysis and classification of haplogroups suggests that the introduction of eg. farmer related haplogroups such as H, V, T, and J were already widespread across Europe during the Iron Age. We, furthermore, identify U haplogroups, which have formerly been



commonly observed in Mesolithic Hunter-Gatherers, to be frequently observed among the sampled individuals, suggesting either continuation or a reintroduction of Hunter-Gatherer related haplogroups into Scandinavia. We see evidence of a broad level of continuity between the global IBD clusters for the European individuals from the period spanning from Bronze Age to Iron Age, and find farmer associated haplogroups such as haplogroup H to be predominantly observed among Western and Northern European populations suggesting that the migrations occurring in this period might not have caused complete replacement of mitochondrial lineages.

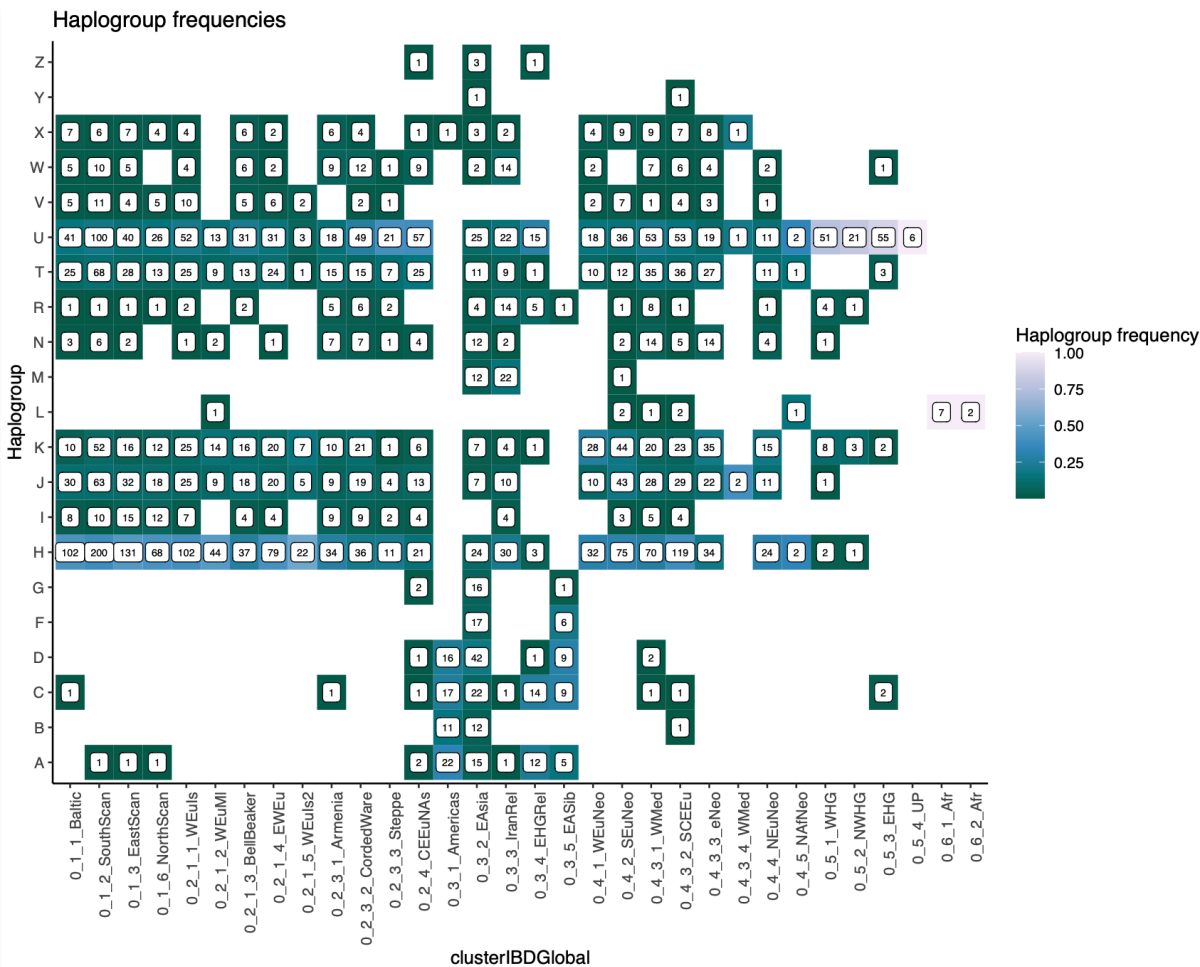

Fig S6.4.1.1 Haplogroup frequencies across Global IBD clusters

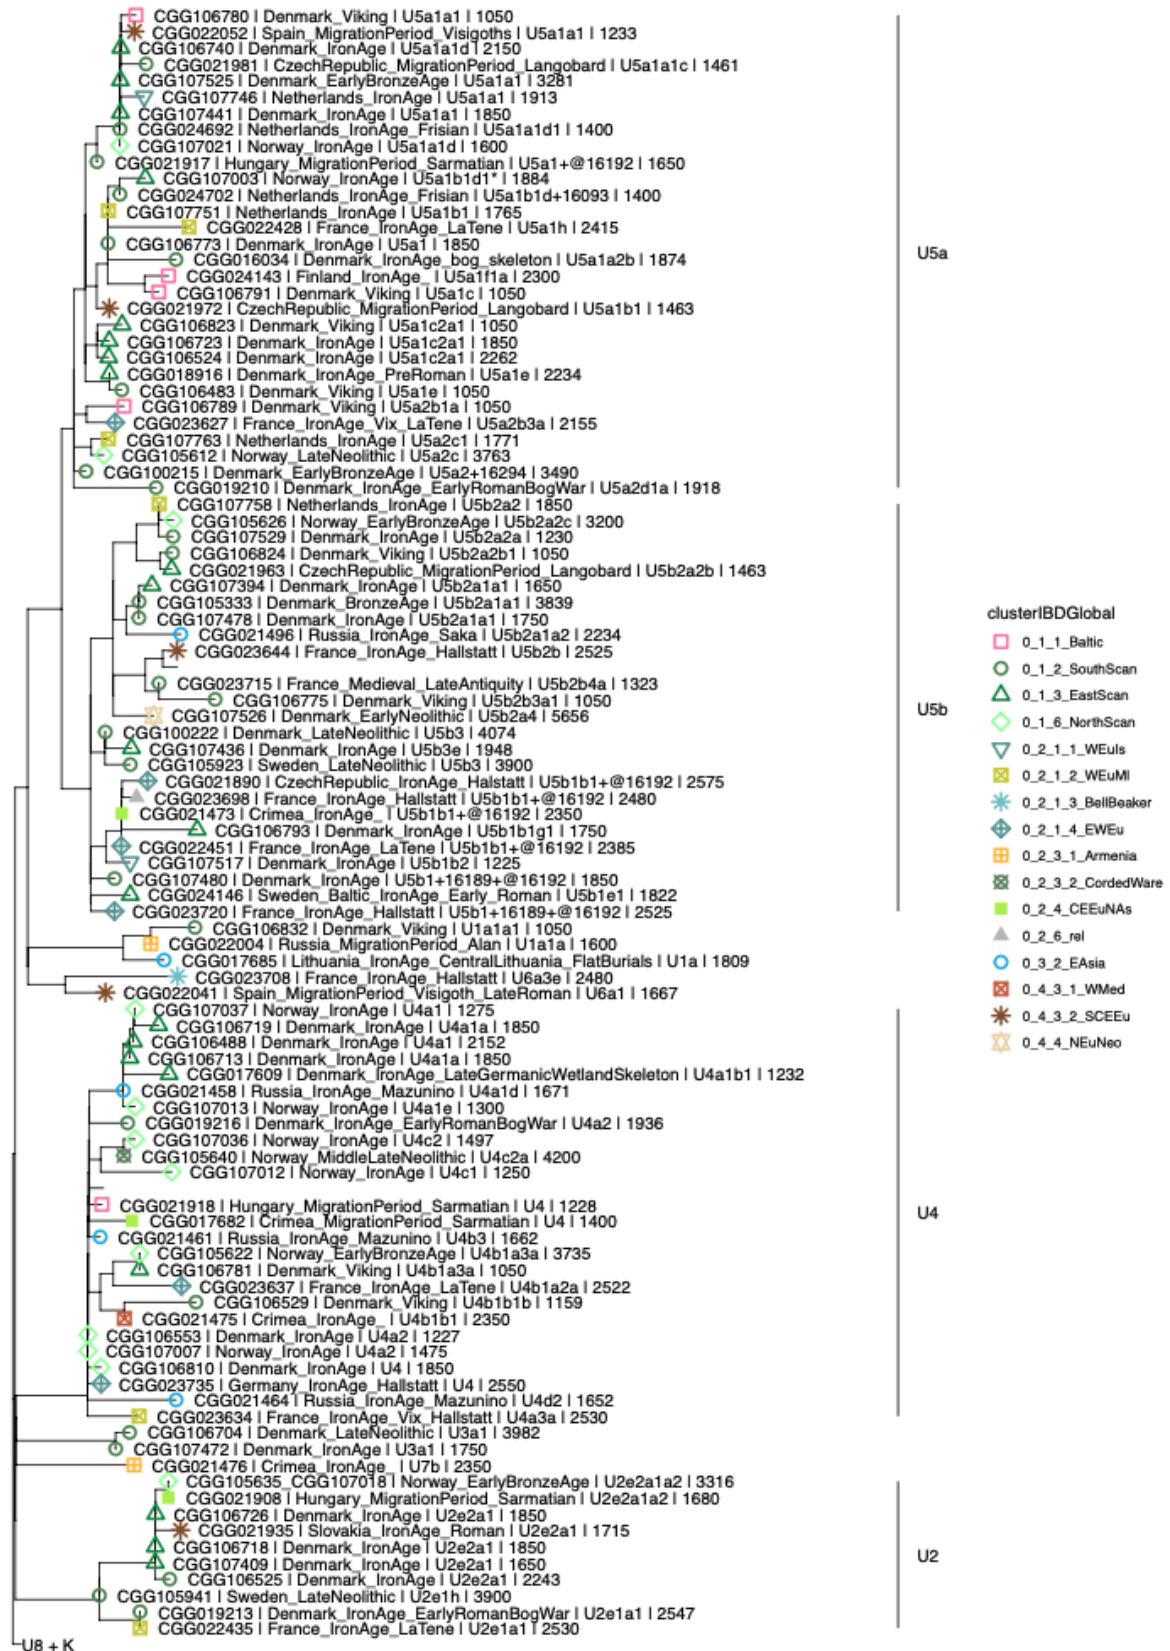

941

942 S6.4.1.2. Maximum likelihood of U haplogroup mitogenomes

943

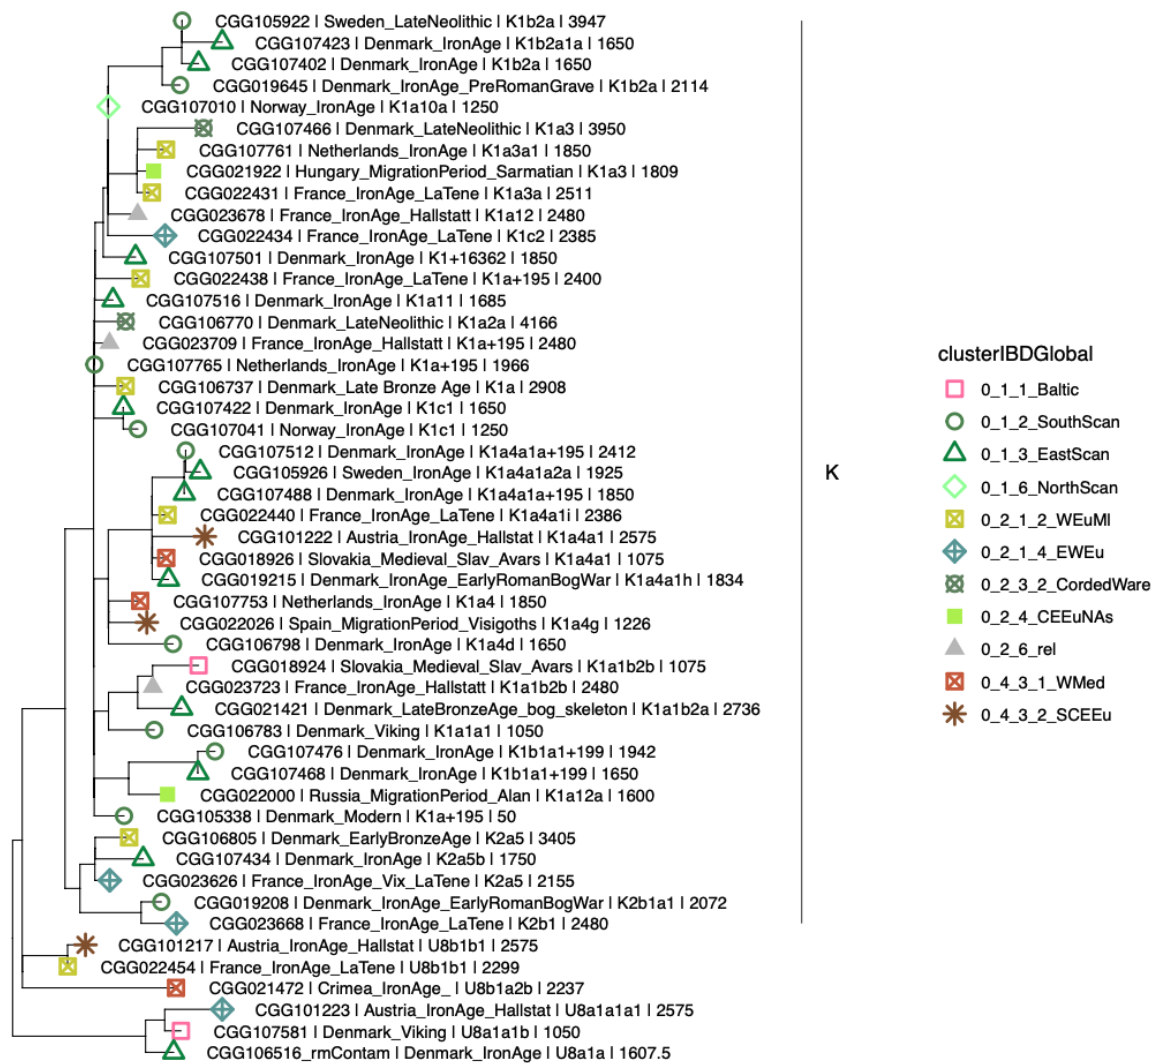

### S6.4.1.3. Maximum likelihood of K haplogroup mitogenomes



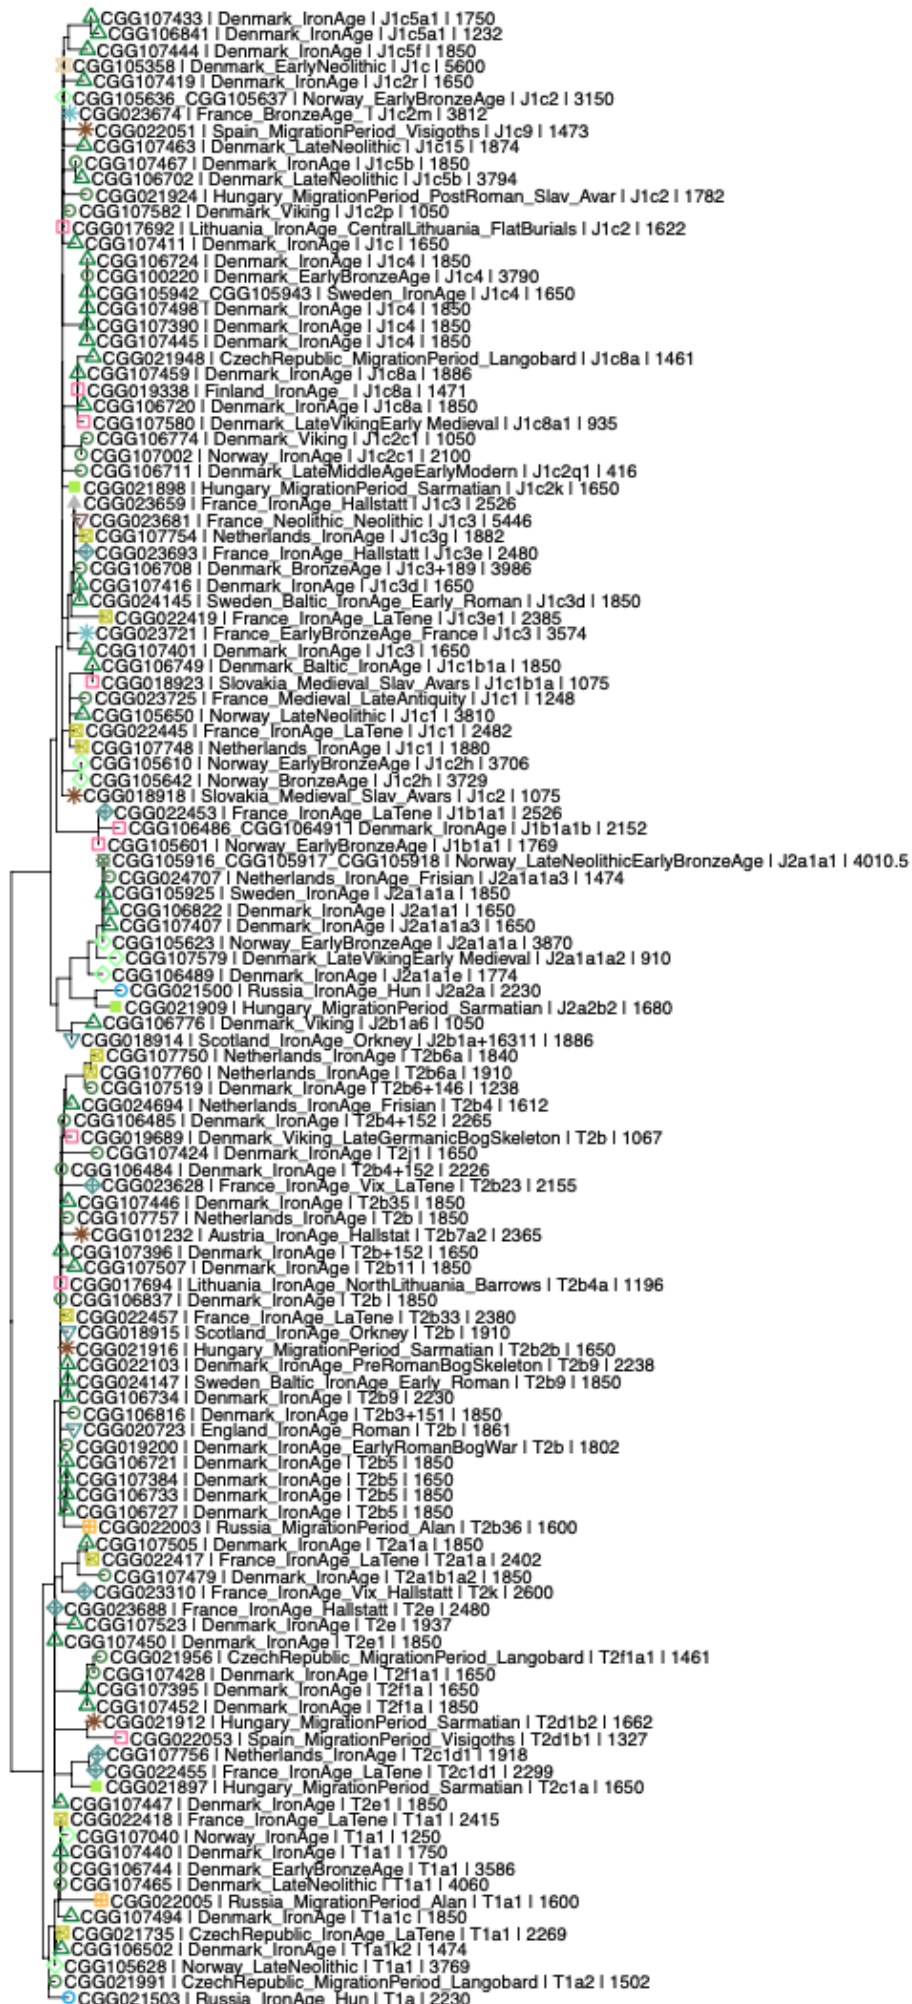

cluster(BDGlobal)

- 0\_1\_1\_Baltic
- 0\_1\_2\_SouthScan
- 0\_1\_3\_EastScan
- 0\_1\_6\_NorthScan
- 0\_2\_1\_1\_WEuS
- 0\_2\_1\_2\_WEuMI
- 0\_2\_1\_3\_BellBeaker
- 0\_2\_1\_4\_EWEu
- 0\_2\_3\_1\_Armenia
- 0\_2\_3\_2\_CordedWare
- 0\_2\_4\_CEEuNAs
- 0\_2\_6\_ral
- 0\_3\_2\_EAsia
- 0\_4\_2\_SEuNeo
- 0\_4\_3\_2\_SCEu
- 0\_4\_4\_NEuNeo

948 S6.4.1.4. Maximum likelihood of J and T haplogroup mitogenomes

949

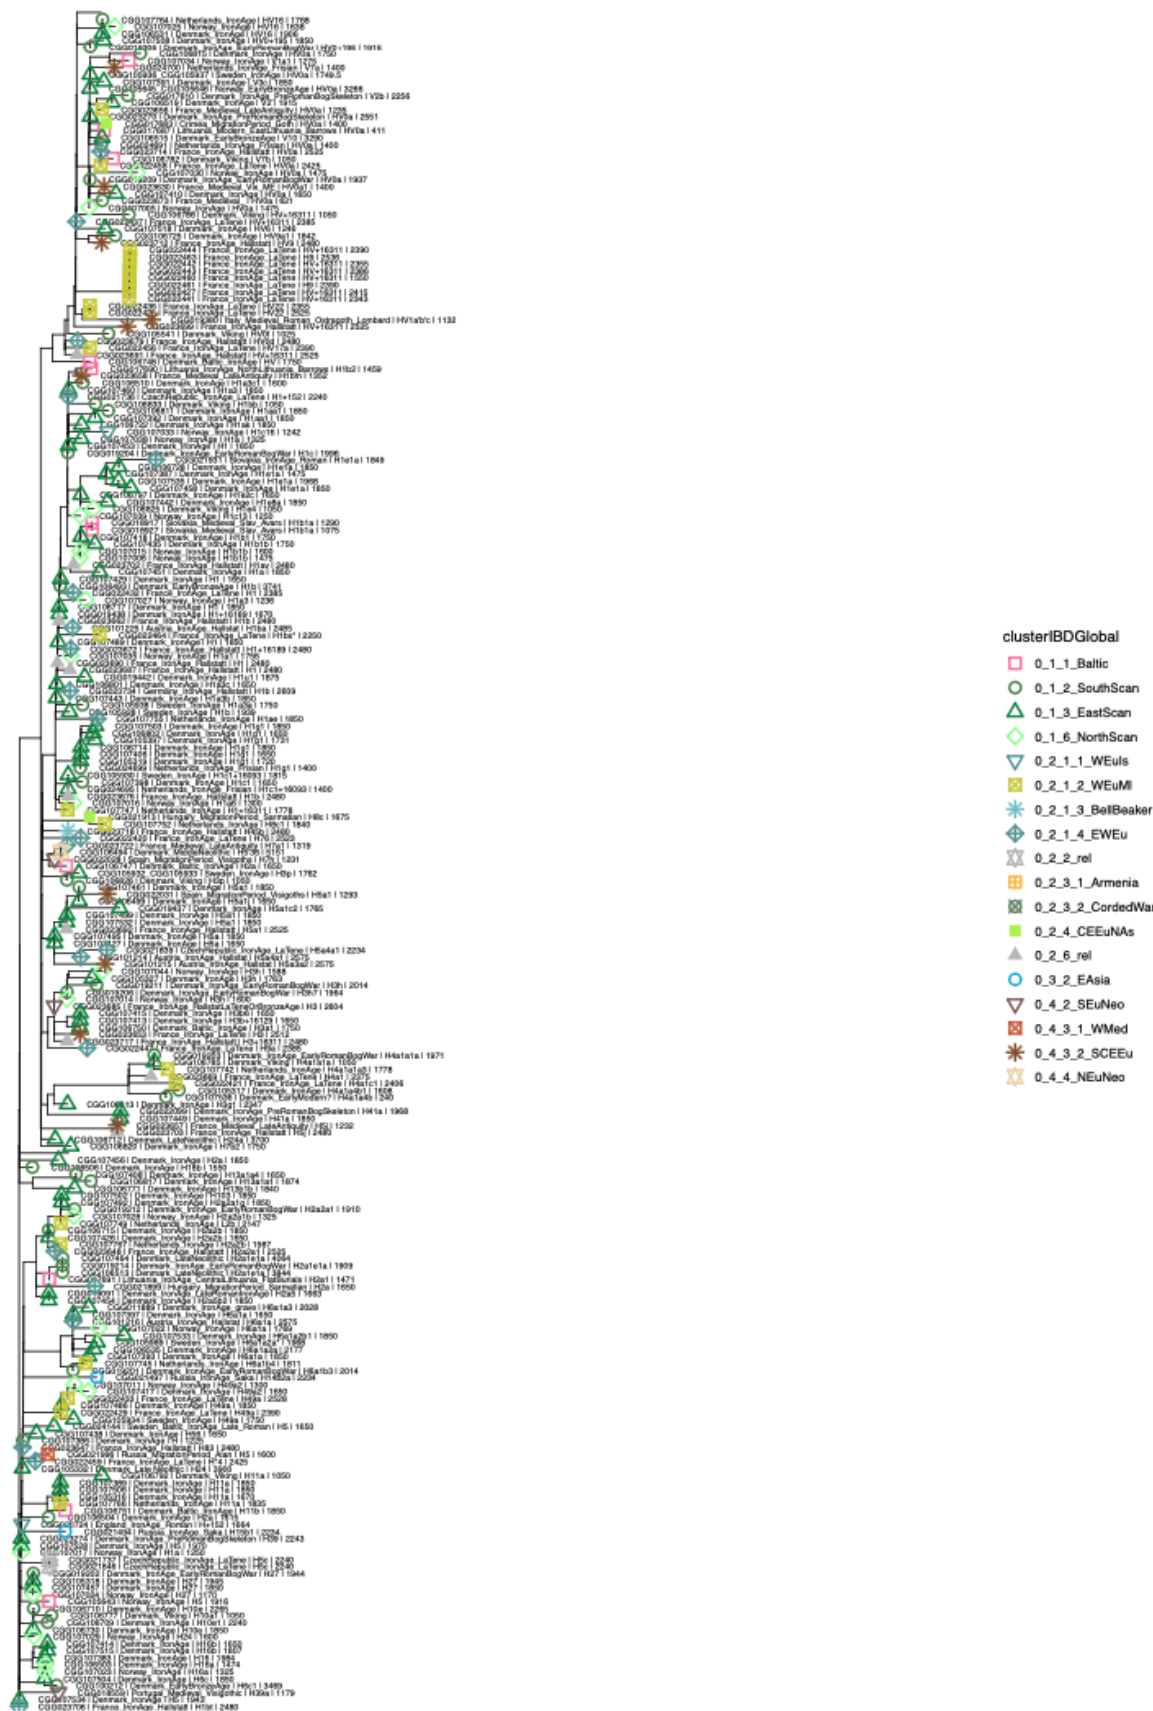

## 951 S6.4.1.5. Maximum likelihood of H and V haplogroup mitogenomes

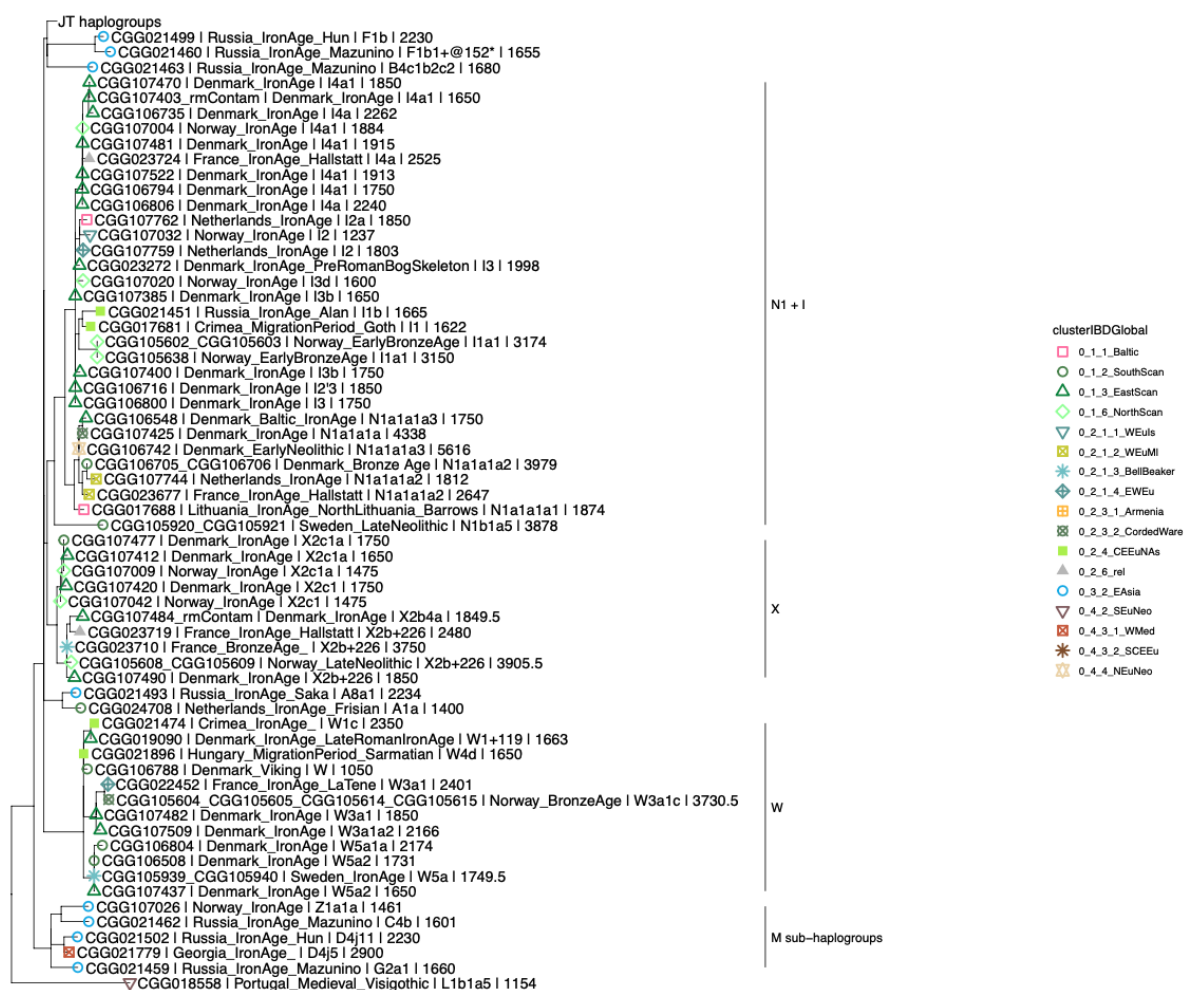

## 952 S6.4.1.6. Maximum likelihood of N, X, W, and M haplogroup mitogenomes

## 953 S6.4.2. Y-chromosome analysis

954

955 The Y-chromosome is the largest uniparentally inherited haplotypic block of the human

956 genome, and it has been correlated with many known events in human history (3,10,11). Due

957 to its larger size, lower effective population size and because it traces primarily the movements

958 of males, it has been shown to be more sensitive to diagnose past demographic fluctuations,

959 such as migration and depopulation, than mitochondrial DNA (12). Initially, most of the

960 developments in the Y-chromosome phylogeny were done by large public academic projects

961 of worldwide diversity (11,13–16), but today most of the recent advances were largely first

962 described in forensic or community-based citizen-scientist efforts using private genetic data

963 (3), and often privately owned databases are far more complete than academic ones. While

964 those are immensely biased towards Western Eurasian ancestry (particularly Northwest

965

966

Europe), this is also true of most genetic data overall (17,18). Ancient DNA poses particular problems to the study of Y-chromosome, such as pervasive missing data, relatively lower coverage, and confounding factors, as miscoding lesions ("damage") and potential contamination (19,20). Many approaches have been used to address those issues, such as giving different weights to transition and transversion variants (21), but in cases where dense sampling in the haplogroup exists and depth of coverage is not limiting a factor for ancient data, phylogenetic placement algorithms have proven to be the most effective (22–24).

## Materials & Methods

We used bcftools (25) mpileup and call function to call genotypes specifying chromosome ploidy, in the 10 Mb accessible region of the Y (2) and excluded indels, triallelic positions and genotypes not called in more than 95% of the population of non-clonal reads. Because haplogroup-defining SNPs are defined from the root of the Y-chromosome phylogeny but the Y-chromosome reference is a mosaic of at least two donors of common European haplogroups (R1b and G2a – see also (26)), variants should be considered in terms of ancestral/derived instead of reference/alternate, particularly for individuals belonging to those two haplogroups. We therefore proceeded to call haplogroups by matching ancestral and derived calls to ISOGG 2019-2020 database, using an in-house script which generates haplogroup paths in root-to-tip fashion, sorted by number of supported variants seen, while also distinguishing C>T and G>A variants in the forward and reverse strand, which could arise from damage. To further incorporate results not listed in ISOGG and make use of the wealth of customer-based private datasets, we have also annotated VCFs using bcftools to all biallelic single nucleotide point mutation variants listed in yBrowse (<https://ybrowse.org/gbrowse2/gff/>) and matched those to the privately-owned Yfull tree ([https://github.com/YFullTeam/YTree/blob/master/ytrees/tree\\_10.07.0.zip](https://github.com/YFullTeam/YTree/blob/master/ytrees/tree_10.07.0.zip)). To visualise the results and confirm haplogroup placement of low-coverage samples, we used PathPhynder (23), which also takes into consideration the presence of ancestral variants to create a parsimonious phylogenetic path for the samples. Y-chromosome results from the new samples have been tabulated in Table S1. As we intended to match Y-chromosome haplogroups with

the autosome IBD clusters, we repeated the process above with samples from the literature, but restricting the subhaplogroup definition to informative clades discussed in the text.

## Discussion

Almost the totality of the Scandinavians older than 4,500 BP belong to haplogroup I2-P215 (52 out of 57). Only starting at 4,500 BP we see the arrival of lineages more common today in the region, such as I1-M253, R1a1a1 (R1a-M417) and R1b1a1b1a (R1b-L11).

Europeans after 5,000 BP were clustered in four distinct groups, with majority of individuals from Scandinavia belonging to the cluster associated with northern Corded Ware ancestry (0\_1 CordedWareNorth), but fifteen individuals dated between 4,600 to 3,700 BP instead were placed along other individuals of similar age in a more eastern group (0\_2\_3\_2 CordedWareEast). The haplogroup frequencies in those is similar to the main cluster, with R1a1a1 (R1a-M417) and R1b1a1b1a (R1b-L11) representing together two thirds of the male lineages in both cases (66/99 for 0\_2\_3\_2\_CordedWareEast and 10/15 for the Scandinavian individuals in it).

In agreement with the finding that those four main clusters are genetically related, when investigating the Y-chromosome lineages of the older members of those groupings, we find them to be dominated by closely related, but clearly distinct, lineages. This can be seen by comparing individuals most associated with early Bell Beakers (0\_2\_1\_3 BellBeaker) and Yamnaya (0\_2\_3\_3 Steppe) clusters. While both are dominated by R1b1a1b (R1b-M269) lineages, the prevalent lineage among the Yamnaya – R1b1a1b1b (R1b-Z2103), found in 18 out of 29 males – is much more common in the Caucasus and Eastern Europe, and is a sister lineage (therefore not a direct source) of the present-day dominant Western European lineage R1b1a1b1a (R1b-L11) (Figure S1 and S2). Instead, almost the totality of males in the Bell Beaker cluster (70 out of 83) are downstream of this haplogroup, at R1b1a1b1a1a2 (R1b-P312), agreeing of modelling results of Bell Beakers being a better source for modern populations than Yamnaya.

When investigating the four main subgroups in the main cluster containing Scandinavian individuals (0\_1 CordedWareNorth), we found no lineage occurring more than 5 times to be



exclusive to neither four, which reiterates the genetic similarity of those clusters. However, some lineages carry clear geographical correlations when using a time transect, as those clusters are shown with autosomes to have been admixed after 2,800 BP.

Haplogroup I1a-DF29 first appears in Scandinavia in the Bronze Age, and its vast number of local descendant lineages seem to indicate an in situ diversification and point of origin (Figure S3). Haplogroup I1a2a (I1a-Z59) is most the common variant of I1a-DF29 among both 0\_1\_2 SouthScan and 0\_1\_3 EastScan clusters, but when restricting to individuals older to 2,800 BP, all four are in the Eastern Scandinavian cluster (Figure S4). This likely indicates that its presence in the South Scandinavian cluster to be associated with the later mixture from an Eastern Scandinavian source.

The four more common subhaplogroups of R1a1a1 (R1a-M417) in Northern Europe also show frequency differences among those four clusters. Almost all R1a1a1b1a1 (R1a-M458) and R1a1a1b1a2 (R1a-Z280) individuals belong to the 0\_1\_1 Baltic cluster, which together with the presence of E1b1b1a1b1 (E1b-L618) individuals, represent a Central and Eastern European affinity of this cluster not seen in the remaining Corded Ware North subgroups.

Conversely, haplogroups R1a1a1a1 (R1a-L664) and R1a1a1b1a3a (R1b-Z284) are more frequent in three mainly Scandinavian clusters, with the majority of R1a1a1b1a3a (R1b-Z284) from the whole dataset deriving from 0\_1\_6 NorthScan. The oldest evidence of this haplogroup takes place in the Corded Ware East cluster (0\_2\_3\_2 CordedWareEast) (at around 4,500 BP), but it is absent in Scandinavia outside of 0\_1\_6 NorthScan before 2,800 BP (Figure S5). Therefore, while we can ultimately trace this subhaplogroup to individuals related to eastern Neolithic Corded Ware ancestry, it likely spread later in Northern Europe, through mixture with individuals carrying North Scandinavian associated ancestry.

Downstream of R1b1a1b1a (R1b-L11), haplogroup R1b1a1b1a1a1 (R1b-U106) have been previously argued to be related to the expansion of the Germanic languages, due to its high frequency in places where those languages are spoken today (Figure S6). We found most of the individuals of the dataset positive for R1b-U106 to belong to two different downstream sublineages, which have starkly distinct distributions, particularly in the early Iron Age. R1b1a1b1a1a1c (R1b-Z19) is found almost exclusively in Northern Europe (with the only

exception being a Langobard from Hungary), and likely represents a local variant of R1b-U106 (Figure S7).

Instead, its sister lineage, R1b1a1b1a1a1b (R1b-S263), is absent in Scandinavia before the Iron Age (Figure S8), where it spreads, likely through an Eastern North Sea source, and becomes dominant in South Scandinavia during the Iron Age, before spreading through Northern Europe. This pattern strongly matches the one seen using autosomes, that detect gene flow back into Scandinavia related to the spread of Germanic languages. Another potential signal of this migration is the increase in frequency of R1b-U106 sister lineage, R1b1a1b1a1a2 (R1b-P312), that has a more continental distribution. and is almost absent in Scandinavia before 2,000 BP.

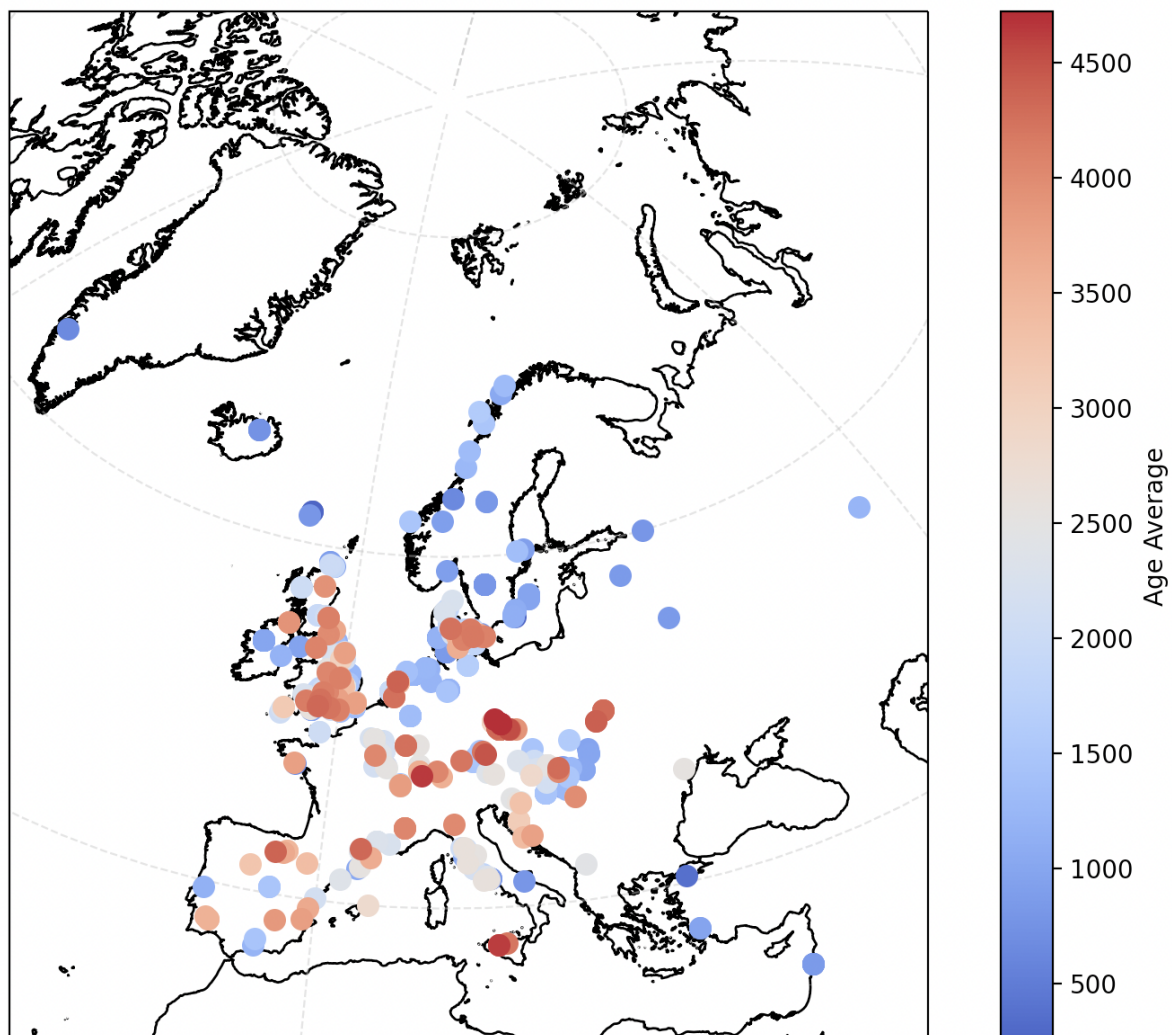

Figure S6.4.2.1: All individuals from the dataset belonging to haplogroup R1b1a1b1a (R1b-L11), coloured by age before the present.

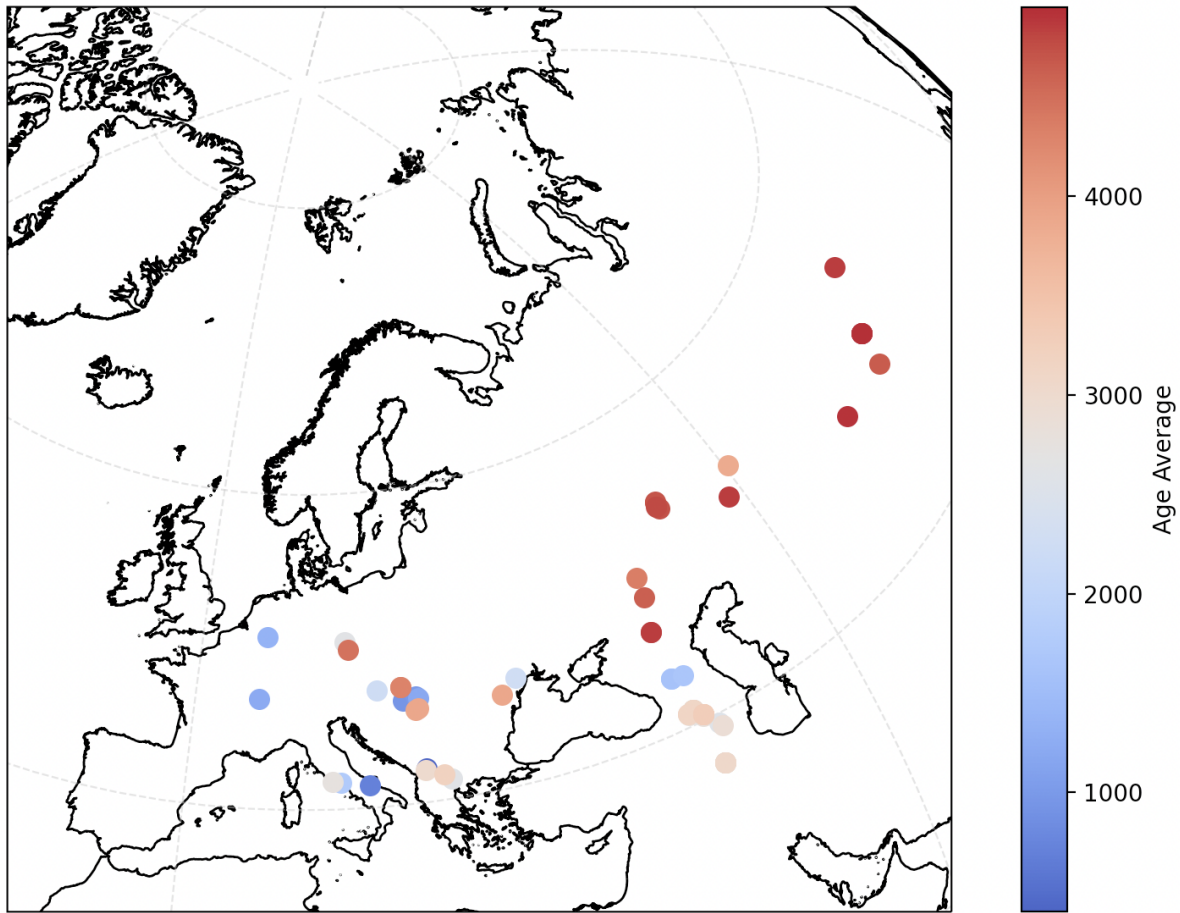

Figure S6.4.2.2: All individuals from the dataset belonging to haplogroup R1b1a1b1b (R1b-LZ2103), coloured by age before the present.

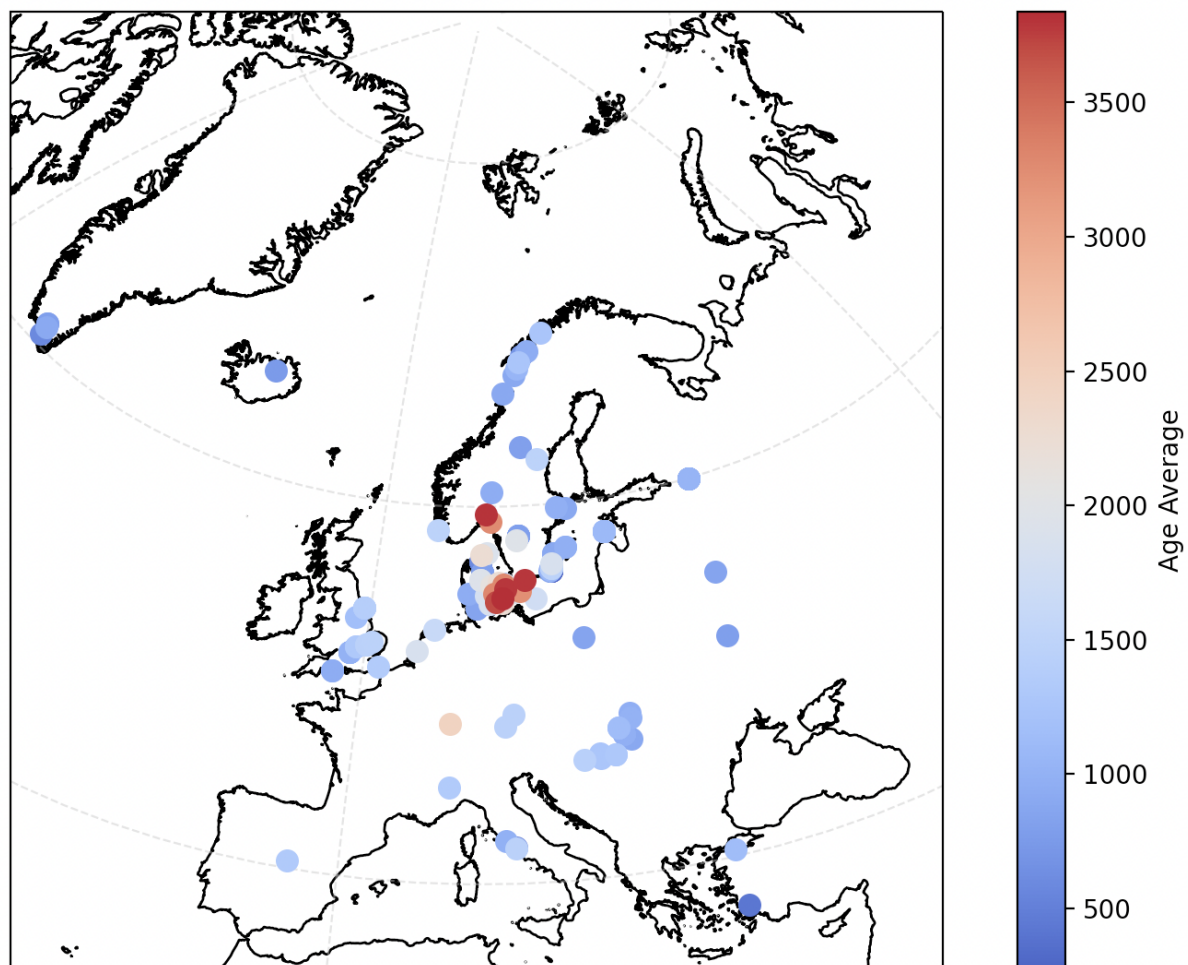

1085

1086 Figure S6.4.2.3: All individuals carrying haplogroup I1a-DF29 from the dataset, coloured by

1087 age before the present.

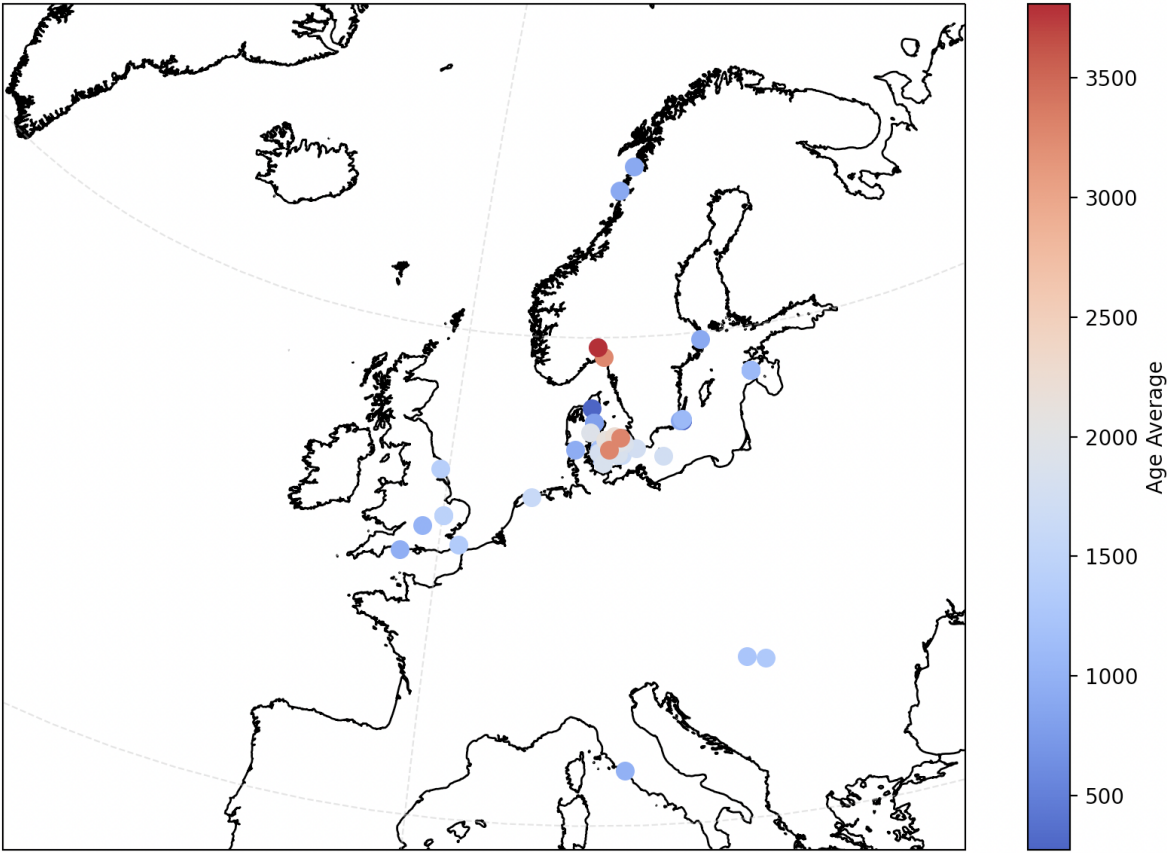

1089

1090 Figure S6.4.2.4: All individuals carrying haplogroup I1a1a (I1a-Z59) from the dataset,  
1091 coloured by age before the present.

1092

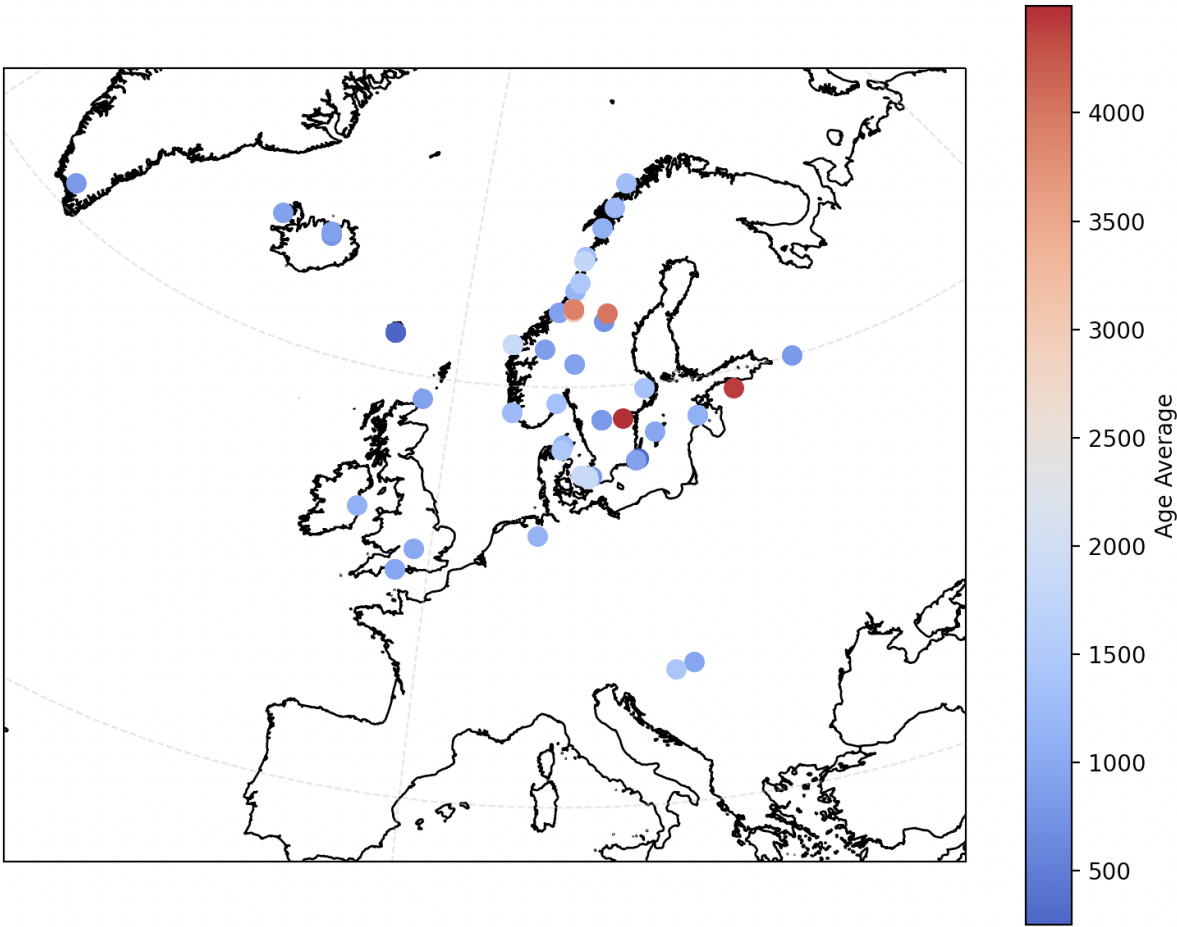

1093

1094 Figure S6.4.2.5: All individuals carrying haplogroup R1a1a1b1a3a (R1b-Z284) from the  
1095 dataset, coloured by age before the present.

1096

1097

1098

1099



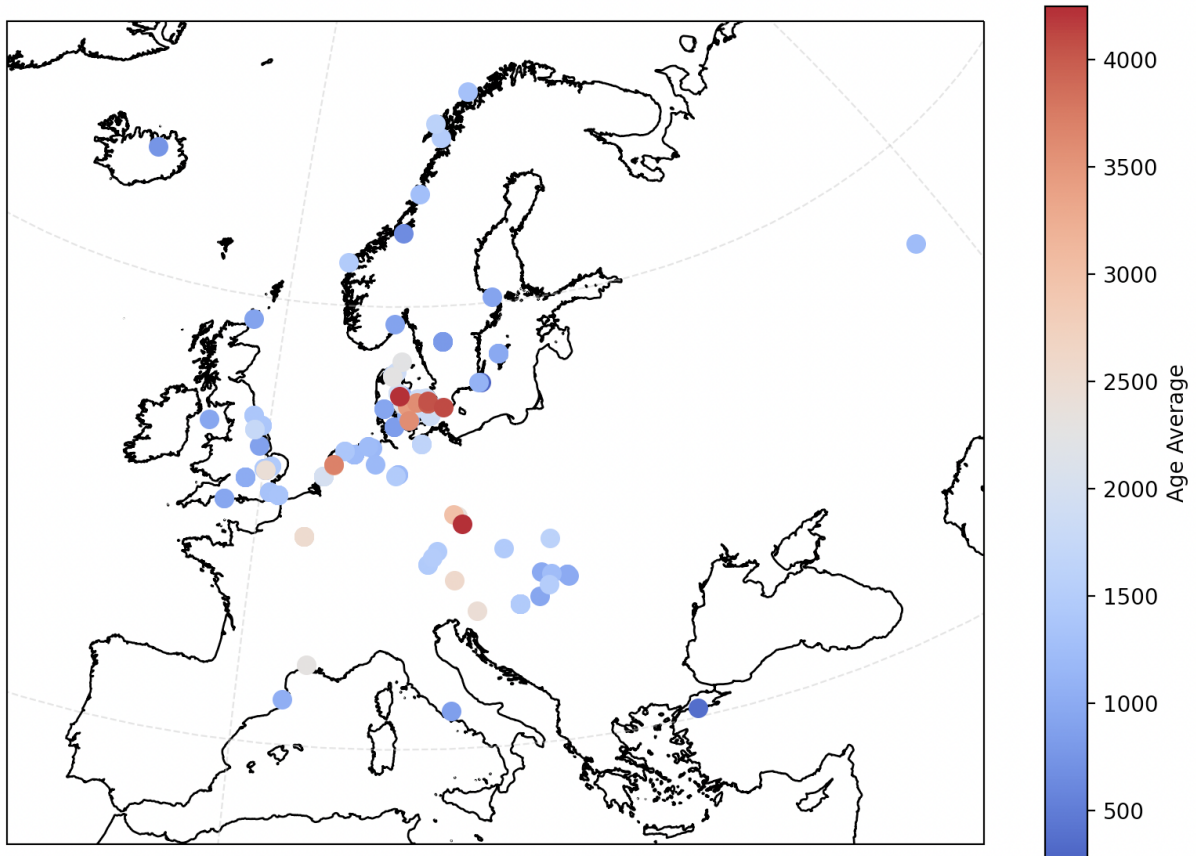

1100

1101 Figure S6.4.2.6: All individuals carrying haplogroup R1b1a1b1a1a1 (R1b-U106) from the  
 1102 dataset, coloured by age before present.

1103

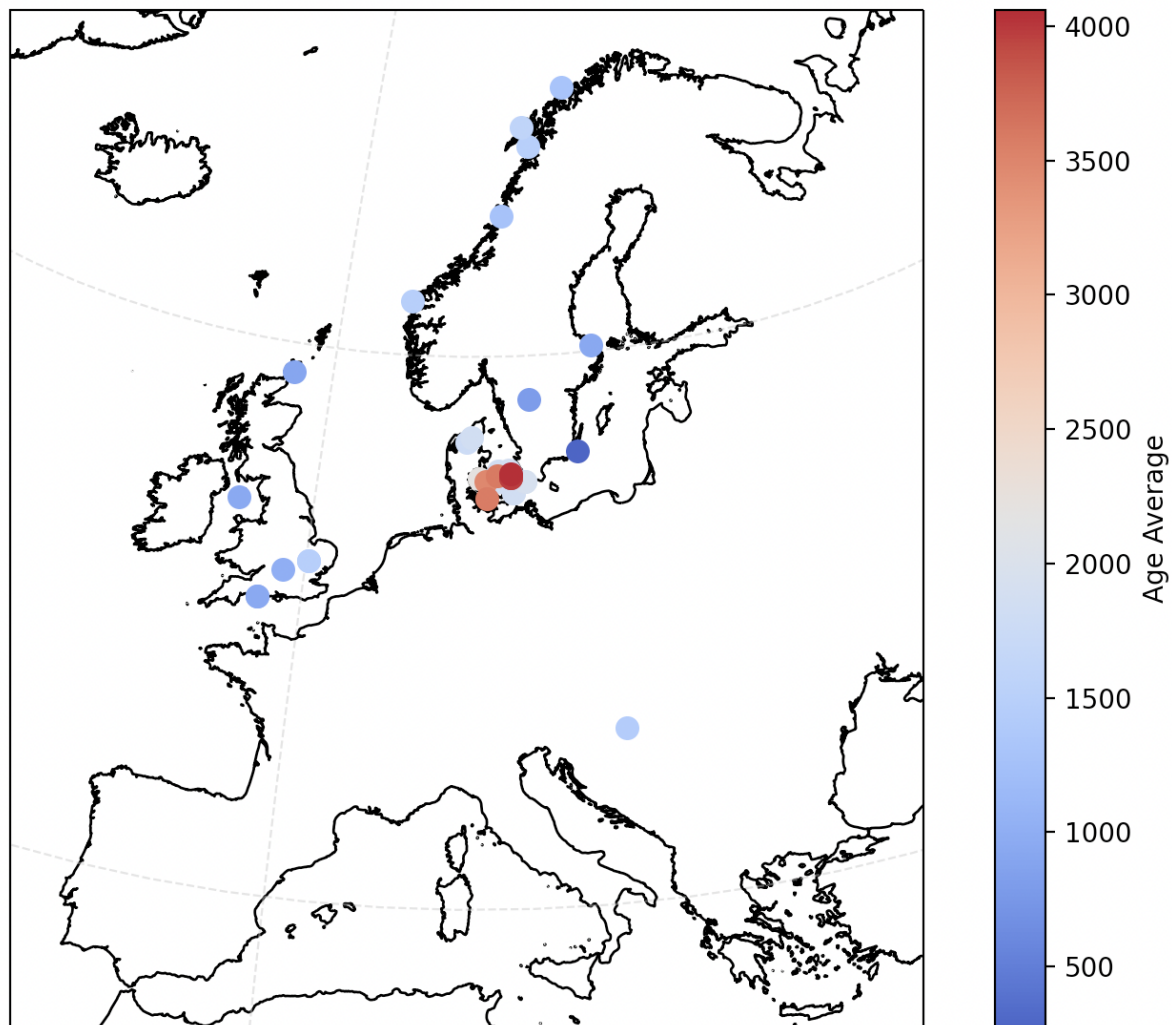

Figure S6.4.2.7: All individuals carrying haplogroup R1b1a1b1a1a1c (R1b-Z19) from the dataset, coloured by age before present.



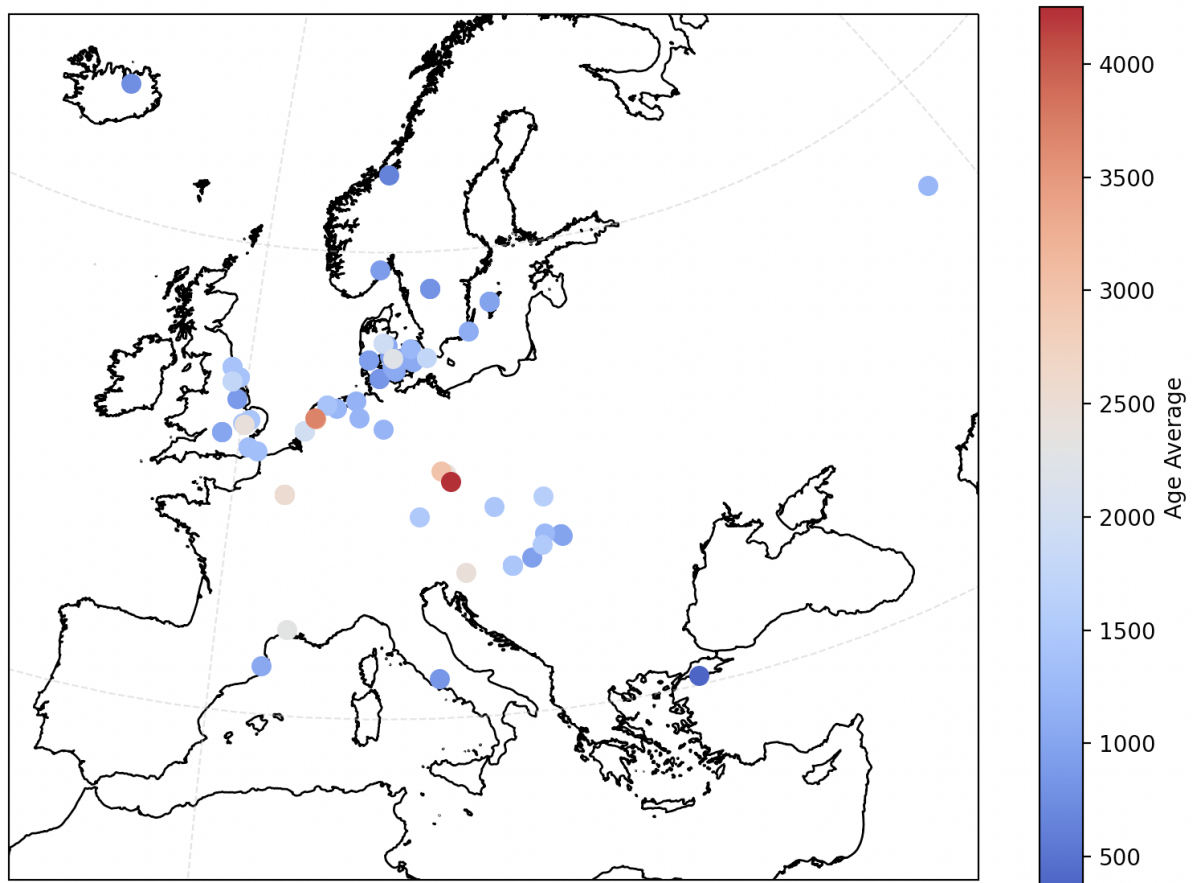

Figure S6.4.2.8: All individuals carrying haplogroup R1b1a1b1a1a1b (R1b-S263) from the dataset, coloured by age before present

## References

1. Skaletsky H, Kuroda-Kawaguchi T, Minx PJ, Cordum HS, Hillier L, Brown LG, et al. The male-specific region of the human Y chromosome is a mosaic of discrete sequence classes. *Nature*. 2003 Jun;423(6942):825–37.
2. Poznik GD, Henn BM, Yee MC, Sliwerska E, Euskirchen GM, Lin AA, et al. Sequencing Y Chromosomes Resolves Discrepancy in Time to Common Ancestor of Males versus Females. *Science*. 2013 Aug 2;341(6145):562–5.
3. Jobling MA, Tyler-Smith C. Human Y-chromosome variation in the genome-sequencing era. *Nat Rev Genet*. 2017 Aug;18(8):485–97.
4. Ebenesersdóttir SS, Sandoval-Velasco M, Gunnarsdóttir ED, Jagadeesan A, Guðmundsdóttir VB, Thordardóttir EL, et al. Ancient genomes from Iceland reveal the making of a human population. *Science*. 2018 Jun;360(6392):1028–32.

- 1125 5. Margaryan A, Lawson DJ, Sikora M, Racimo F, Rasmussen S, Moltke I, et al. Population  
1126 genomics of the Viking world. *Nature*. 2020 Sep;585(7825):390–6.
- 1127 6. Villalba-Mouco V, Oliart C, Rihuete-Herrada C, Childebayeva A, Rohrlach AB, Fregeiro  
1128 MI, et al. Genomic transformation and social organization during the Copper Age–Bronze Age  
1129 transition in southern Iberia. *Sci Adv*. 2021 Nov 19;7(47):eabi7038.
- 1130 7. Moilanen U, Kirkinen T, Saari NJ, Rohrlach AB, Krause J, Onkamo P, et al. A Woman  
1131 with a Sword? – Weapon Grave at Suontaka Vesitorninmäki, Finland. *Eur J Archaeol*. 2022  
1132 Feb;25(1):42–60.
- 1133 8. Roca-Rada X, Tereso S, Rohrlach AB, Brito A, Williams MP, Umbelino C, et al. A 1000-  
1134 year-old case of Klinefelter’s syndrome diagnosed by integrating morphology, osteology, and  
1135 genetics. *The Lancet*. 2022 Aug;400(10353):691–2.
- 1136 9. Anastasiadou K, Silva M, Booth T, Speidel L, Audsley T, Barrington C, et al. Detection  
1137 of chromosomal aneuploidy in ancient genomes. *Commun Biol*. 2024 Jan 11;7(1):1–9.
- 1138 10. Diamond J, Bellwood P. Farmers and Their Languages: The First Expansions. *Science*.  
1139 2003 Apr 25;300(5619):597–603.
- 1140 11. Poznik GD, Xue Y, Mendez FL, Willems TF, Massaia A, Wilson Sayres MA, et al.  
1141 Punctuated bursts in human male demography inferred from 1,244 worldwide Y-  
1142 chromosome sequences. *Nat Genet*. 2016 Jun;48(6):593–9.
- 1143 12. Karmin M, Saag L, Vicente M, Sayres MAW, Järve M, Talas UG, et al. A recent  
1144 bottleneck of Y chromosome diversity coincides with a global change in culture. *Genome Res*.  
1145 2015 Apr;25(4):459–66.
- 1146 13. Consortium TYC. A Nomenclature System for the Tree of Human Y-Chromosomal  
1147 Binary Haplogroups. *Genome Res*. 2002 Jan 2;12(2):339–48.
- 1148 14. Karafet TM, Mendez FL, Meilerman MB, Underhill PA, Zegura SL, Hammer MF. New  
1149 binary polymorphisms reshape and increase resolution of the human Y chromosomal  
1150 haplogroup tree. *Genome Res*. 2008 Jan 5;18(5):830–8.
- 1151 15. Hallast P, Batini C, Zadik D, Maisano Delser P, Wetton JH, Arroyo-Pardo E, et al. The Y-  
1152 Chromosome Tree Bursts into Leaf: 13,000 High-Confidence SNPs Covering the Majority of  
1153 Known Clades. *Mol Biol Evol*. 2015 Mar 1;32(3):661–73.
- 1154 16. Bergström A, McCarthy SA, Hui R, Almarri MA, Ayub Q, Danecek P, et al. Insights into  
1155 human genetic variation and population history from 929 diverse genomes. *Science*

1156 [Internet]. 2020 Mar 20 [cited 2021 Dec 23]; Available from:  
 1157 <https://www.science.org/doi/abs/10.1126/science.aay5012>

1158 17. Popejoy AB, Fullerton SM. Genomics is failing on diversity. *Nature*. 2016  
 1159 Oct;538(7624):161–4.

1160 18. Sirugo G, Williams SM, Tishkoff SA. The Missing Diversity in Human Genetic Studies.  
 1161 *Cell*. 2019 Mar 21;177(1):26–31.

1162 19. Kivisild T. The study of human Y chromosome variation through ancient DNA. *Hum*  
 1163 *Genet*. 2017 May 1;136(5):529–46.

1164 20. Cappellini E, Prohaska A, Racimo F, Welker F, Pedersen MW, Allentoft ME, et al.  
 1165 Ancient Biomolecules and Evolutionary Inference. *Annu Rev Biochem*. 2018;87(1):1029–60.

1166 21. Moreno-Mayar JV, Vinner L, de Barros Damgaard P, de la Fuente C, Chan J, Spence JP,  
 1167 et al. Early human dispersals within the Americas. *Science*. 2018 Dec 7;362(6419):eaav2621.

1168 22. Barbera P, Kozlov AM, Czech L, Morel B, Darriba D, Flouri T, et al. EPA-ng: Massively  
 1169 Parallel Evolutionary Placement of Genetic Sequences. *Syst Biol*. 2019 Mar 1;68(2):365–9.

1170 23. Martiniano R, De Sanctis B, Hallast P, Durbin R. Placing Ancient DNA Sequences into  
 1171 Reference Phylogenies. *Mol Biol Evol*. 2022 Feb 1;39(2):msac017.

1172 24. Allentoft ME, Sikora M, Refoyo-Martínez A, Irving-Pease EK, Fischer A, Barrie W, et al.  
 1173 Population Genomics of Stone Age Eurasia [Internet]. *bioRxiv*; 2022 [cited 2022 Sep 29]. p.  
 1174 2022.05.04.490594. Available from:  
 1175 <https://www.biorxiv.org/content/10.1101/2022.05.04.490594v4>

1176 25. Li H, Handsaker B, Wysoker A, Fennell T, Ruan J, Homer N, et al. The Sequence  
 1177 Alignment/Map format and SAMtools. *Bioinformatics*. 2009 Aug 15;25(16):2078–9.

1178 26. Behar DM, van Oven M, Rosset S, Metspalu M, Loogväli EL, Silva NM, et al. A  
 1179 “Copernican” Reassessment of the Human Mitochondrial DNA Tree from its Root. *Am J Hum*  
 1180 *Genet*. 2012 Apr 6;90(4):675–84.

1181 27. Scorrano G, Yediay FE, Pinotti T, Feizabadifarahani M, Kristiansen K. The genetic and  
 1182 cultural impact of the Steppe migration into Europe. *Ann Hum Biol*. 2021 Apr 3;48(3):223–33.

1183 28. Lazaridis I, Alpaslan-Roodenberg S, Acar A, Açikkol A, Agelarakis A, Aghikyan L, et al.  
 1184 The genetic history of the Southern Arc: A bridge between West Asia and Europe. *Science*.  
 1185 2022 Aug 26;377(6609):eabm4247.

## S6.5. DATES

### Methods

We carried out DATES ((Narasimhan *et al.*, 2019) analyses to estimate the timing of relevant admixture events in this study. For each set of target/source populations listed in tables S6.2.2.1-5, we first subset plink files to relevant individuals and to the 1240k SNP panel. Next, we converted plink files to eigenstrat format using convertf (Patterson, Price and Reich, 2006; Price *et al.*, 2006) and ran DATES using default settings. Lastly, we calculated the absolute admixture date using the relative age of the admixture event from DATES (in generations ago), a mean generation time of 25 years, and the midpoint of the mean radiocarbon ages of all dated individuals in the target population (see figures S6.5.1 and S6.5.2).

### Results

#### S6.5.2.1 Dating admixture of Eastern Scandinavian Bronze Age and Southern Scandinavian Bronze Age in Northern Jutlandic Iron Age individuals

| DATES_set                 | DATES_cluster        | sampleId                        | groupLabel                       | ageAverage |
|---------------------------|----------------------|---------------------------------|----------------------------------|------------|
| set1_0_1_2_3t             | 0_1_3_3              | NEO220.allentoft_2023_nature    | Sweden_Neolithic                 | 3989       |
| set1_0_1_2_3t             | 0_1_3_3              | NEO224.allentoft_2023_nature    | Sweden_Neolithic                 | 3945       |
| set1_0_1_2_3t             | 0_1_3_3              | NEO227.allentoft_2023_nature    | Sweden_Neolithic                 | 3948       |
| set1_0_1_2_3t             | 0_1_3_3              | NEO228.allentoft_2023_nature    | Sweden_Neolithic                 | 3843       |
| set1_0_1_2_3t             | 0_1_2_4              | NEO878.allentoft_2023_nature    | Denmark_Neolithic                | 4026       |
| set1_0_1_2_3t             | 0_1_2_3t             | CGG019201.mccoll_230707_ironage | Denmark_IronAge_EarlyRomanBogWar | 2014       |
| set1_0_1_2_3t             | 0_1_2_3t             | CGG019203.mccoll_230707_ironage | Denmark_IronAge_EarlyRomanBogWar | 1971       |
| set1_0_1_2_3t             | 0_1_2_3t             | CGG019204.mccoll_230707_ironage | Denmark_IronAge_EarlyRomanBogWar | 1996       |
| set1_0_1_2_3t             | 0_1_2_3t             | CGG019205.mccoll_230707_ironage | Denmark_IronAge_EarlyRomanBogWar | 1915       |
| set1_0_1_2_3t             | 0_1_2_3t             | CGG019206.mccoll_230707_ironage | Denmark_IronAge_EarlyRomanBogWar | 1964       |
| set1_0_1_2_3t             | 0_1_2_3t             | CGG019209.mccoll_230707_ironage | Denmark_IronAge_EarlyRomanBogWar | 1937       |
| set1_0_1_2_3t             | 0_1_2_3t             | CGG019211.mccoll_230707_ironage | Denmark_IronAge_EarlyRomanBogWar | 2014       |
| set1_0_1_2_3t             | 0_1_2_3t             | CGG019216.mccoll_230707_ironage | Denmark_IronAge_EarlyRomanBogWar | 1936       |
| set1_0_1_2_3t             | 0_1_2_4              | CGG106513.mccoll_230817_ironage | Denmark_LateNeolithic            | 3844       |
| set1_0_1_2_3t             | 0_1_2_4              | CGG106704.mccoll_230817_ironage | Denmark_LateNeolithic            | 3982       |
| set1_0_1_2_3t             | 0_1_2_4              | CGG106744.mccoll_230817_ironage | Denmark_EarlyBronzeAge           | 3586       |
| DATES_set                 | DATES_cluster        | sampleId                        | groupLabel                       | ageAverage |
| set2_0_1_2_3t-2114_1909BP | 0_1_3_3_4_2800+      | NEO220.allentoft_2023_nature    | Sweden_Neolithic                 | 3989       |
| set2_0_1_2_3t-2114_1909BP | 0_1_3_3_4_2800+      | NEO224.allentoft_2023_nature    | Sweden_Neolithic                 | 3945       |
| set2_0_1_2_3t-2114_1909BP | 0_1_3_3_4_2800+      | NEO227.allentoft_2023_nature    | Sweden_Neolithic                 | 3948       |
| set2_0_1_2_3t-2114_1909BP | 0_1_3_3_4_2800+      | NEO228.allentoft_2023_nature    | Sweden_Neolithic                 | 3843       |
| set2_0_1_2_3t-2114_1909BP | 0_1_2_4_3_2_2_2800+  | NEO878.allentoft_2023_nature    | Denmark_Neolithic                | 4026       |
| set2_0_1_2_3t-2114_1909BP | 0_1_2_4_3_2_2_2800+  | CGG019202.mccoll_230707_ironage | Denmark_LateNeolithic            | 3844       |
| set2_0_1_2_3t-2114_1909BP | 0_1_2_4_3_2_2_2800+  | CGG106704.mccoll_230817_ironage | Denmark_LateNeolithic            | 3982       |
| set2_0_1_2_3t-2114_1909BP | 0_1_2_4_3_2_2_2800+  | CGG106744.mccoll_230817_ironage | Denmark_EarlyBronzeAge           | 3586       |
| set2_0_1_2_3t-2114_1909BP | 0_1_2_3t-2114_1909BP | CGG019214.mccoll_230707_ironage | Denmark_IronAge_EarlyRomanBogWar | 1909       |
| set2_0_1_2_3t-2114_1909BP | 0_1_2_3t-2114_1909BP | CGG019212.mccoll_230707_ironage | Denmark_IronAge_EarlyRomanBogWar | 1910       |
| set2_0_1_2_3t-2114_1909BP | 0_1_2_3t-2114_1909BP | CGG019205.mccoll_230707_ironage | Denmark_IronAge_EarlyRomanBogWar | 1915       |
| set2_0_1_2_3t-2114_1909BP | 0_1_2_3t-2114_1909BP | CGG019210.mccoll_230707_ironage | Denmark_IronAge_EarlyRomanBogWar | 1918       |
| set2_0_1_2_3t-2114_1909BP | 0_1_2_3t-2114_1909BP | CGG019216.mccoll_230707_ironage | Denmark_IronAge_EarlyRomanBogWar | 1936       |
| set2_0_1_2_3t-2114_1909BP | 0_1_2_3t-2114_1909BP | CGG019209.mccoll_230707_ironage | Denmark_IronAge_EarlyRomanBogWar | 1937       |
| set2_0_1_2_3t-2114_1909BP | 0_1_2_3t-2114_1909BP | CGG107476.mccoll_230817_ironage | Denmark_IronAge                  | 1942       |
| set2_0_1_2_3t-2114_1909BP | 0_1_2_3t-2114_1909BP | CGG019202.mccoll_230707_ironage | Denmark_IronAge_EarlyRomanBogWar | 1944       |
| set2_0_1_2_3t-2114_1909BP | 0_1_2_3t-2114_1909BP | CGG019206.mccoll_230707_ironage | Denmark_IronAge_EarlyRomanBogWar | 1964       |
| set2_0_1_2_3t-2114_1909BP | 0_1_2_3t-2114_1909BP | CGG019203.mccoll_230707_ironage | Denmark_IronAge_EarlyRomanBogWar | 1971       |
| set2_0_1_2_3t-2114_1909BP | 0_1_2_3t-2114_1909BP | CGG019204.mccoll_230707_ironage | Denmark_IronAge_EarlyRomanBogWar | 1996       |
| set2_0_1_2_3t-2114_1909BP | 0_1_2_3t-2114_1909BP | CGG019201.mccoll_230707_ironage | Denmark_IronAge_EarlyRomanBogWar | 2014       |
| set2_0_1_2_3t-2114_1909BP | 0_1_2_3t-2114_1909BP | CGG019211.mccoll_230707_ironage | Denmark_IronAge_EarlyRomanBogWar | 2014       |
| set2_0_1_2_3t-2114_1909BP | 0_1_2_3t-2114_1909BP | CGG019208.mccoll_230707_ironage | Denmark_IronAge_EarlyRomanBogWar | 2072       |
| set2_0_1_2_3t-2114_1909BP | 0_1_2_3t-2114_1909BP | CGG019645.mccoll_230707_ironage | Denmark_IronAge_PreRomanGrave    | 2114       |



|                           |                      |                                 |                 |      |
|---------------------------|----------------------|---------------------------------|-----------------|------|
| set4_0_1_3_2t-1900_1800BP | 0_1_3_2t-1900_1800BP | CGG107456.mccoll_230817_ironage | Denmark_IronAge | 1850 |
| set4_0_1_3_2t-1900_1800BP | 0_1_3_2t-1900_1800BP | CGG107457.mccoll_230817_ironage | Denmark_IronAge | 1850 |
| set4_0_1_3_2t-1900_1800BP | 0_1_3_2t-1900_1800BP | CGG107458.mccoll_230817_ironage | Denmark_IronAge | 1850 |
| set4_0_1_3_2t-1900_1800BP | 0_1_3_2t-1900_1800BP | CGG107460.mccoll_230817_ironage | Denmark_IronAge | 1850 |
| set4_0_1_3_2t-1900_1800BP | 0_1_3_2t-1900_1800BP | CGG107470.mccoll_230817_ironage | Denmark_IronAge | 1850 |
| set4_0_1_3_2t-1900_1800BP | 0_1_3_2t-1900_1800BP | CGG107486.mccoll_230817_ironage | Denmark_IronAge | 1850 |
| set4_0_1_3_2t-1900_1800BP | 0_1_3_2t-1900_1800BP | CGG107488.mccoll_230817_ironage | Denmark_IronAge | 1850 |
| set4_0_1_3_2t-1900_1800BP | 0_1_3_2t-1900_1800BP | CGG107489.mccoll_230817_ironage | Denmark_IronAge | 1850 |
| set4_0_1_3_2t-1900_1800BP | 0_1_3_2t-1900_1800BP | CGG107490.mccoll_230817_ironage | Denmark_IronAge | 1850 |
| set4_0_1_3_2t-1900_1800BP | 0_1_3_2t-1900_1800BP | CGG107494.mccoll_230817_ironage | Denmark_IronAge | 1850 |
| set4_0_1_3_2t-1900_1800BP | 0_1_3_2t-1900_1800BP | CGG107495.mccoll_230817_ironage | Denmark_IronAge | 1850 |
| set4_0_1_3_2t-1900_1800BP | 0_1_3_2t-1900_1800BP | CGG107499.mccoll_230817_ironage | Denmark_IronAge | 1850 |
| set4_0_1_3_2t-1900_1800BP | 0_1_3_2t-1900_1800BP | CGG107501.mccoll_230817_ironage | Denmark_IronAge | 1850 |
| set4_0_1_3_2t-1900_1800BP | 0_1_3_2t-1900_1800BP | CGG107502.mccoll_230817_ironage | Denmark_IronAge | 1850 |
| set4_0_1_3_2t-1900_1800BP | 0_1_3_2t-1900_1800BP | CGG107503.mccoll_230817_ironage | Denmark_IronAge | 1850 |
| set4_0_1_3_2t-1900_1800BP | 0_1_3_2t-1900_1800BP | CGG107504.mccoll_230817_ironage | Denmark_IronAge | 1850 |
| set4_0_1_3_2t-1900_1800BP | 0_1_3_2t-1900_1800BP | CGG107506.mccoll_230817_ironage | Denmark_IronAge | 1850 |
| set4_0_1_3_2t-1900_1800BP | 0_1_3_2t-1900_1800BP | CGG107507.mccoll_230817_ironage | Denmark_IronAge | 1850 |
| set4_0_1_3_2t-1900_1800BP | 0_1_3_2t-1900_1800BP | CGG107508.mccoll_230817_ironage | Denmark_IronAge | 1850 |
| set4_0_1_3_2t-1900_1800BP | 0_1_3_2t-1900_1800BP | CGG107532.mccoll_230817_ironage | Denmark_IronAge | 1850 |
| set4_0_1_3_2t-1900_1800BP | 0_1_3_2t-1900_1800BP | CGG107533.mccoll_230817_ironage | Denmark_IronAge | 1850 |
| set4_0_1_3_2t-1900_1800BP | 0_1_3_2t-1900_1800BP | CGG019442.mccoll_230817_ironage | Denmark_IronAge | 1875 |

## S6.5.2.3 Dating admixture of Eastern Scandinavian Bronze Age and Southern Scandinavian

### Bronze Age in admixed Danish Bronze Age individuals

| DATES_set                     | DATES_cluster            | sampleId                        | groupLabel             | ageAverage |
|-------------------------------|--------------------------|---------------------------------|------------------------|------------|
| set5_0_1_3_3_2t-3794_3735BP   | 0_1_3_3_4_2800+          | NEO220.allentoft_2023_nature    | Sweden_Neolithic       | 3989       |
| set5_0_1_3_3_2t-3794_3735BP   | 0_1_3_3_4_2800+          | NEO224.allentoft_2023_nature    | Sweden_Neolithic       | 3945       |
| set5_0_1_3_3_2t-3794_3735BP   | 0_1_3_3_4_2800+          | NEO227.allentoft_2023_nature    | Sweden_Neolithic       | 3948       |
| set5_0_1_3_3_2t-3794_3735BP   | 0_1_3_3_4_2800+          | NEO228.allentoft_2023_nature    | Sweden_Neolithic       | 3843       |
| set5_0_1_3_3_2t-3794_3735BP   | 0_1_2_4_3_2_2_2800+      | NEO878.allentoft_2023_nature    | Denmark_Neolithic      | 4026       |
| set5_0_1_3_3_2t-3794_3735BP   | 0_1_2_4_3_2_2_2800+      | CGG106513.mccoll_230817_ironage | Denmark_LateNeolithic  | 3844       |
| set5_0_1_3_3_2t-3794_3735BP   | 0_1_2_4_3_2_2_2800+      | CGG106704.mccoll_230817_ironage | Denmark_LateNeolithic  | 3982       |
| set5_0_1_3_3_2t-3794_3735BP   | 0_1_2_4_3_2_2_2800+      | CGG106744.mccoll_230817_ironage | Denmark_EarlyBronzeAge | 3586       |
| set5_0_1_3_3_2t-3794_3735BP   | 0_1_3_3_2t-3794_3735BP   | NEO93.allentoft_2023_nature     | Denmark_BronzeAge      | 3735       |
| set5_0_1_3_3_2t-3794_3735BP   | 0_1_3_3_2t-3794_3735BP   | CGG106702.mccoll_230817_ironage | Denmark_LateNeolithic  | 3794       |
| Datin                         |                          |                                 |                        |            |
| DATES_set                     | DATES_cluster            | sampleId                        | groupLabel             | ageAverage |
| set6_0_1_3_3_2_2t-3350-3281BP | 0_1_3_3_4_2800+          | NEO220.allentoft_2023_nature    | Sweden_Neolithic       | 3989       |
| set6_0_1_3_3_2_2t-3350-3281BP | 0_1_3_3_4_2800+          | NEO224.allentoft_2023_nature    | Sweden_Neolithic       | 3945       |
| set6_0_1_3_3_2_2t-3350-3281BP | 0_1_3_3_4_2800+          | NEO227.allentoft_2023_nature    | Sweden_Neolithic       | 3948       |
| set6_0_1_3_3_2_2t-3350-3281BP | 0_1_3_3_4_2800+          | NEO228.allentoft_2023_nature    | Sweden_Neolithic       | 3843       |
| set6_0_1_3_3_2_2t-3350-3281BP | 0_1_2_4_3_2_2_2800+      | NEO878.allentoft_2023_nature    | Denmark_Neolithic      | 4026       |
| set6_0_1_3_3_2_2t-3350-3281BP | 0_1_2_4_3_2_2_2800+      | CGG106513.mccoll_230817_ironage | Denmark_LateNeolithic  | 3844       |
| set6_0_1_3_3_2_2t-3350-3281BP | 0_1_2_4_3_2_2_2800+      | CGG106704.mccoll_230817_ironage | Denmark_LateNeolithic  | 3982       |
| set6_0_1_3_3_2_2t-3350-3281BP | 0_1_2_4_3_2_2_2800+      | CGG106744.mccoll_230817_ironage | Denmark_EarlyBronzeAge | 3586       |
| set6_0_1_3_3_2_2t-3350-3281BP | 0_1_3_3_2_2t-3350-3281BP | NEO563.allentoft_2023_nature    | Denmark_BronzeAge      | 3350       |
| set6_0_1_3_3_2_2t-3350-3281BP | 0_1_3_3_2_2t-3350-3281BP | NEO590.allentoft_2023_nature    | Denmark_BronzeAge      | 3290       |
| set6_0_1_3_3_2_2t-3350-3281BP | 0_1_3_3_2_2t-3350-3281BP | CGG106515.mccoll_230817_ironage | Denmark_EarlyBronzeAge | 3290       |
| set6_0_1_3_3_2_2t-3350-3281BP | 0_1_3_3_2_2t-3350-3281BP | CGG107525.mccoll_230817_ironage | Denmark_EarlyBronzeAge | 3281       |

## S6.5.2.4 Dating admixture of Eastern Scandinavian Bronze Age and Western

### Scandinavian Bronze Age in admixed Norwegian Bronze Age individuals

| DATES_set                   | DATES_cluster          | sampleId                                  | groupLabel            | ageAverage |
|-----------------------------|------------------------|-------------------------------------------|-----------------------|------------|
| set7_0_1_6_4_1t-3316_3150BP | 0_1_3_3_4_2800+        | NEO220.allentoft_2023_nature              | Sweden_Neolithic      | 3989       |
| set7_0_1_6_4_1t-3316_3150BP | 0_1_3_3_4_2800+        | NEO224.allentoft_2023_nature              | Sweden_Neolithic      | 3945       |
| set7_0_1_6_4_1t-3316_3150BP | 0_1_3_3_4_2800+        | NEO227.allentoft_2023_nature              | Sweden_Neolithic      | 3948       |
| set7_0_1_6_4_1t-3316_3150BP | 0_1_3_3_4_2800+        | NEO228.allentoft_2023_nature              | Sweden_Neolithic      | 3843       |
| set7_0_1_6_4_1t-3316_3150BP | 0_1_6_4_2_2_2800+      | CGG105610.mccoll_230817_ironage           | Norway_EarlyBronzeAge | 3706       |
| set7_0_1_6_4_1t-3316_3150BP | 0_1_6_4_2_2_2800+      | CGG105612.mccoll_230817_ironage           | Norway_LateNeolithic  | 3763       |
| set7_0_1_6_4_1t-3316_3150BP | 0_1_6_4_2_2_2800+      | CGG105623.mccoll_230817_ironage           | Norway_EarlyBronzeAge | 3870       |
| set7_0_1_6_4_1t-3316_3150BP | 0_1_6_4_2_2_2800+      | CGG105628.mccoll_230817_ironage           | Norway_LateNeolithic  | 3769       |
| set7_0_1_6_4_1t-3316_3150BP | 0_1_6_4_2_2_2800+      | CGG105642.mccoll_230817_ironage           | Norway_BronzeAge      | 3729       |
| set7_0_1_6_4_1t-3316_3150BP | 0_1_6_4_1t-3316_3150BP | CGG105602.CGG105603.mccoll_230821_ironage | Norway_EarlyBronzeAge | 3174       |
| set7_0_1_6_4_1t-3316_3150BP | 0_1_6_4_1t-3316_3150BP | CGG105635.CGG107018.mccoll_230821_ironage | Norway_EarlyBronzeAge | 3316       |
| set7_0_1_6_4_1t-3316_3150BP | 0_1_6_4_1t-3316_3150BP | CGG105636.CGG105637.mccoll_230821_ironage | Norway_EarlyBronzeAge | 3150       |
| set7_0_1_6_4_1t-3316_3150BP | 0_1_6_4_1t-3316_3150BP | CGG105638.mccoll_230817_ironage           | Norway_EarlyBronzeAge | 3150       |

## S6.5.2.5 Dating admixture of Yamnaya and Latvian-Lithuanian Hunter Gatherers in admixed

### Eastern Scandinavian Bronze Age individuals

| DATES_set                   | DATES_cluster          | sampleId                       | groupLabel               | ageAverage |
|-----------------------------|------------------------|--------------------------------|--------------------------|------------|
| set8_0_1_3_3_4t-3989_3843BP | 0_2_3_3_2800+          | RISE546.allentoft_2015_nature  | Russia_BronzeAge_Yamnaya | 4850       |
| set8_0_1_3_3_4t-3989_3843BP | 0_2_3_3_2800+          | RISE550.allentoft_2015_nature  | Russia_BronzeAge_Yamnaya | 4935       |
| set8_0_1_3_3_4t-3989_3843BP | 0_2_3_3_2800+          | RISE548.allentoft_2015_nature  | Russia_BronzeAge_Yamnaya | 4850       |
| set8_0_1_3_3_4t-3989_3843BP | 0_2_3_3_2800+          | RISE547.allentoft_2015_nature  | Russia_BronzeAge_Yamnaya | 4711       |
| set8_0_1_3_3_4t-3989_3843BP | 0_5_1_2_3_2800+        | Latvia_HG1.jones_2017_currBiol | Latvia_Mesolithic        | 8308       |
| set8_0_1_3_3_4t-3989_3843BP | 0_5_1_2_3_2800+        | Latvia_HG2.jones_2017_currBiol | Latvia_Mesolithic        | 7689       |
| set8_0_1_3_3_4t-3989_3843BP | 0_5_1_2_3_2800+        | Spiginas4.mittnik_2018_natComm | Lithuania_Mesolithic     | 8276       |
| set8_0_1_3_3_4t-3989_3843BP | 0_1_3_3_4t-3989_3843BP | NEO228.allentoft_2023_nature   | Sweden_Neolithic         | 3843       |
| set8_0_1_3_3_4t-3989_3843BP | 0_1_3_3_4t-3989_3843BP | NEO227.allentoft_2023_nature   | Sweden_Neolithic         | 3948       |
| set8_0_1_3_3_4t-3989_3843BP | 0_1_3_3_4t-3989_3843BP | NEO220.allentoft_2023_nature   | Sweden_Neolithic         | 3989       |
| set8_0_1_3_3_4t-3989_3843BP | 0_1_3_3_4t-3989_3843BP | NEO224.allentoft_2023_nature   | Sweden_Neolithic         | 3945       |

  

| DATES_set                 | DATES_cluster        | sampleId                        | groupLabel                  | ageAverage |
|---------------------------|----------------------|---------------------------------|-----------------------------|------------|
| set9_0_1_3_3t-3989_3750BP | 0_2_3_3_2800+        | RISE546.allentoft_2015_nature   | Russia_BronzeAge_Yamnaya    | 4850       |
| set9_0_1_3_3t-3989_3750BP | 0_2_3_3_2800+        | RISE550.allentoft_2015_nature   | Russia_BronzeAge_Yamnaya    | 4935       |
| set9_0_1_3_3t-3989_3750BP | 0_2_3_3_2800+        | RISE548.allentoft_2015_nature   | Russia_BronzeAge_Yamnaya    | 4850       |
| set9_0_1_3_3t-3989_3750BP | 0_2_3_3_2800+        | RISE547.allentoft_2015_nature   | Russia_BronzeAge_Yamnaya    | 4711       |
| set9_0_1_3_3t-3989_3750BP | 0_5_1_2_3_2800+      | Latvia_HG1.jones_2017_currBiol  | Latvia_Mesolithic           | 8308       |
| set9_0_1_3_3t-3989_3750BP | 0_5_1_2_3_2800+      | Latvia_HG2.jones_2017_currBiol  | Latvia_Mesolithic           | 7689       |
| set9_0_1_3_3t-3989_3750BP | 0_5_1_2_3_2800+      | Spiginas4.mittnik_2018_natComm  | Lithuania_Mesolithic        | 8276       |
| set9_0_1_3_3t-3989_3750BP | 0_1_3_3t-3989_3750BP | NEO225.allentoft_2023_nature    | Sweden_Neolithic            | 3750       |
| set9_0_1_3_3t-3989_3750BP | 0_1_3_3t-3989_3750BP | o11009.malmstrom_2019_procRSocB | Sweden_Neolithic_Megalithic | 3790       |
| set9_0_1_3_3t-3989_3750BP | 0_1_3_3t-3989_3750BP | CGG105650.mccoll_230817_ironage | Norway_LateNeolithic        | 3810       |
| set9_0_1_3_3t-3989_3750BP | 0_1_3_3t-3989_3750BP | NEO228.allentoft_2023_nature    | Sweden_Neolithic            | 3843       |
| set9_0_1_3_3t-3989_3750BP | 0_1_3_3t-3989_3750BP | NEO261.allentoft_2023_nature    | Sweden_Neolithic            | 3895       |
| set9_0_1_3_3t-3989_3750BP | 0_1_3_3t-3989_3750BP | NEO224.allentoft_2023_nature    | Sweden_Neolithic            | 3945       |
| set9_0_1_3_3t-3989_3750BP | 0_1_3_3t-3989_3750BP | NEO227.allentoft_2023_nature    | Sweden_Neolithic            | 3948       |
| set9_0_1_3_3t-3989_3750BP | 0_1_3_3t-3989_3750BP | NEO220.allentoft_2023_nature    | Sweden_Neolithic            | 3989       |

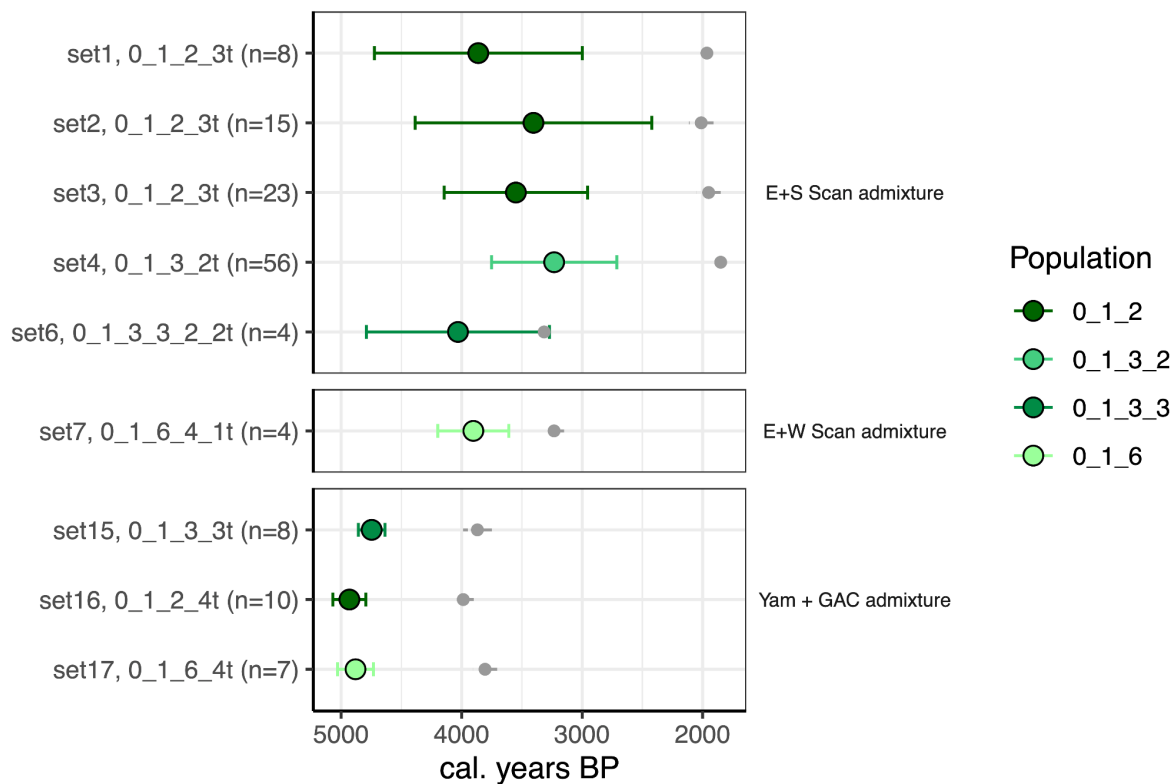

Figure S6.5.1. Suggested date of admixture between Eastern and Southern Bronze Age ancestries (top panel), Eastern and Western Scandinavian Bronze Age ancestries (middle panel), and Yamnaya and Globular Amphora Farmers (lower panel), for a Bronze and Iron Age target populations (0\_1\_2 = Southern Scandinavians, 0\_1\_3\_2 Danish Isles Eastern Scandinavians, 0\_1\_3\_3 = Bronze Age Eastern Scandinavians, 0\_1\_6 = Western Scandinavians)

1437

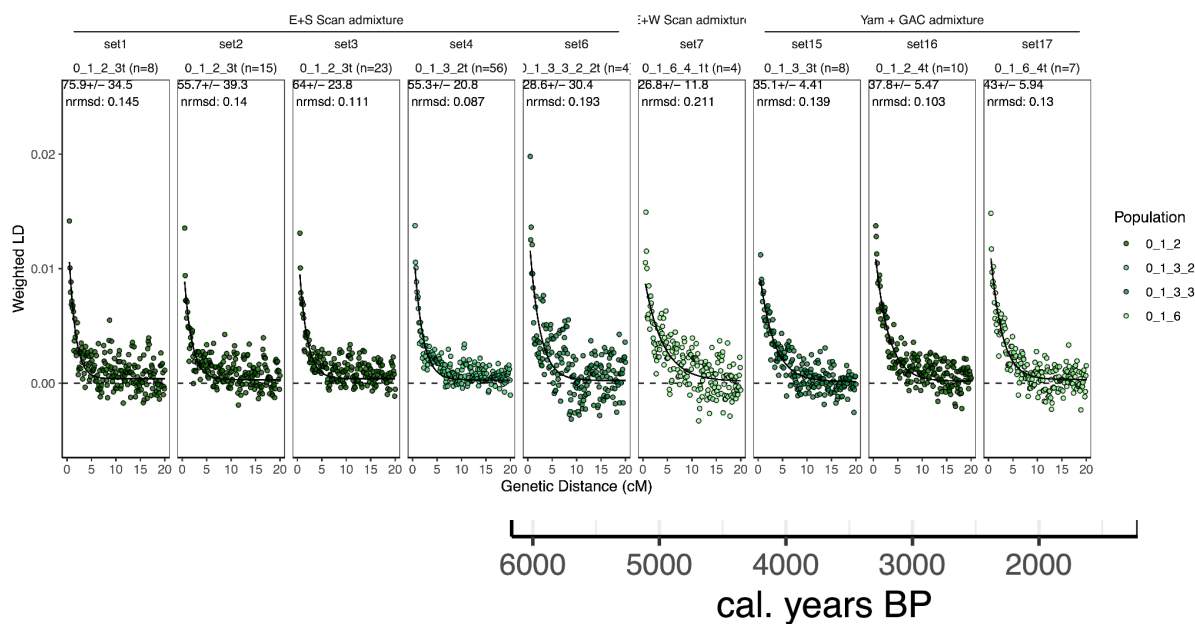

1438

1439

1440 Figure S6.5.2.

1441

1442

1443

## 1444 S6.6. Kinship

1445

1446 In order to identify pairs of close relatives in our dataset, we ran ngsRelate (v2) on the imputed  
1447 dataset (see section S5) subset to individuals of European ancestry. We used the pairwise  
1448 relatedness estimate (rab) from ngsRelate to categorise pairs of individuals into degrees of  
1449 relatedness (0, 1, 2 or unrelated). We define cutoffs for each degree as the midpoint between  
1450 the theoretical value of the following and preceeding degrees of relatedness as follows: 0  
1451 degree [1, 0.75), 1st degree [0.75, 0.375), 2nd degree [0.375, 0.1875), unrelated [0.1875,0].  
1452 Furthermore, for 1st degree relatives we categorise each pair of individuals as either parent-  
1453 offspring or siblings based on the R0 estimate from ngsRelate as follows: PO [0,2-2), sib [2-  
1454 2,1].

1455 In total, we find 82 pairs of close relatives among our samples sequenced for this study,  
1456 represented by 110 individuals. Among the pairs of close relatives we identify 26 parent-  
1457 offspring relationships, 13 pairs of full siblings, and 43 pairs of 2nd degree relationships  
1458 (grandparent-grandchild, avuncular relationship or half-siblings). We identify several clusters



where multiple individuals are related. Where possible, we resolved these clusters into pedigrees (Figures 6.8.1-6.8.5). Generally, owing to a relatively low number of samples from each site, we do not find any large extended pedigrees. We do, however, identify multiple examples of relatives coming from different sites. Most striking is the finding of two pairs of siblings and one pair of parent-offspring, all of which have one individual buried at the site Les Moidons and the other at Parancot 2.4 km away (Figure S6.6.4).

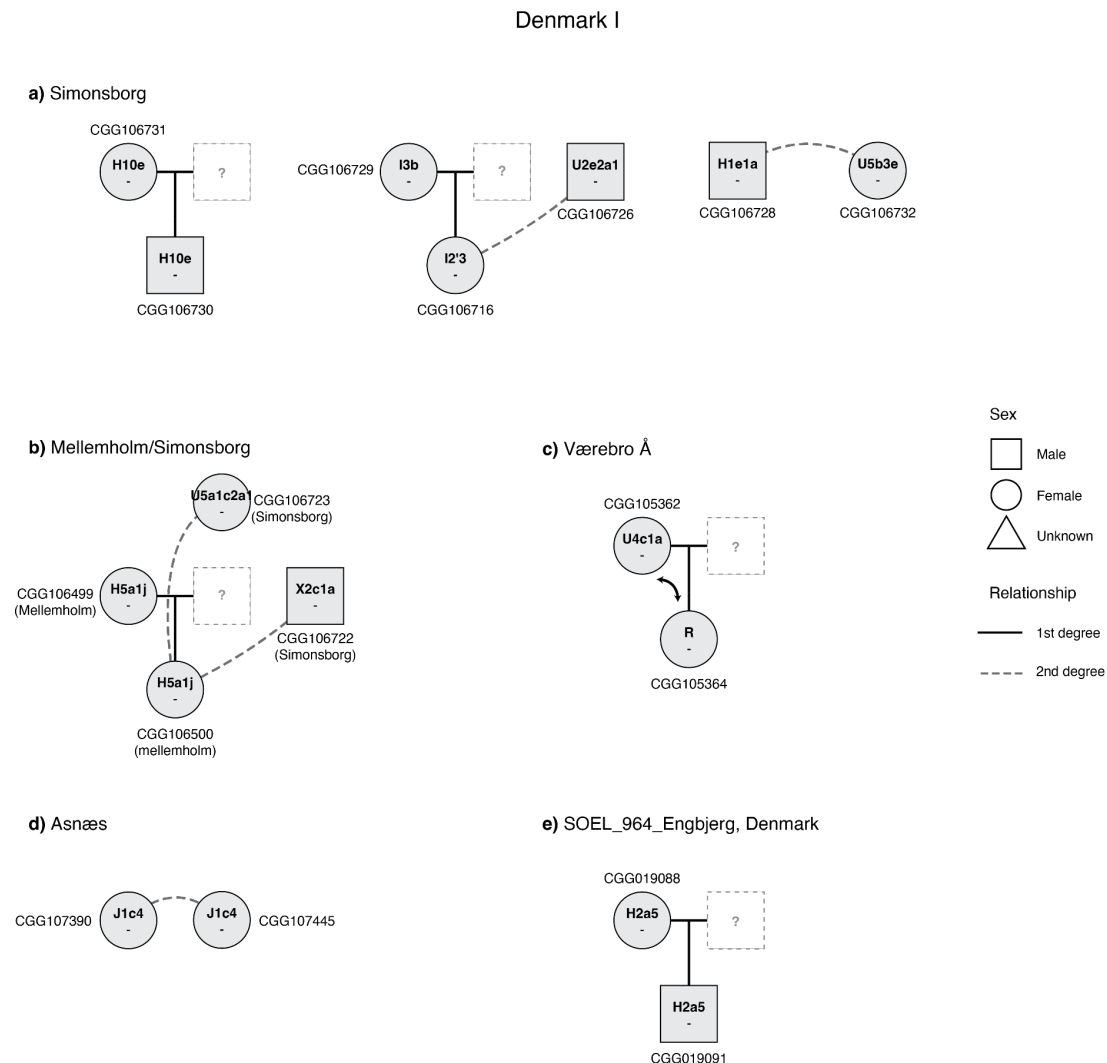

Figure S6.6.1. Pedigrees from Denmark (part 1). Pedigrees were constructed manually, based on results from ngsRelate. Solid black line indicates first degree relationships, whereas stippled line indicates unknown second-degree relationships. Shape for each individual indicates sex. Mitochondrial haplogroup is denoted inside the shape for each individual.

Denmark II

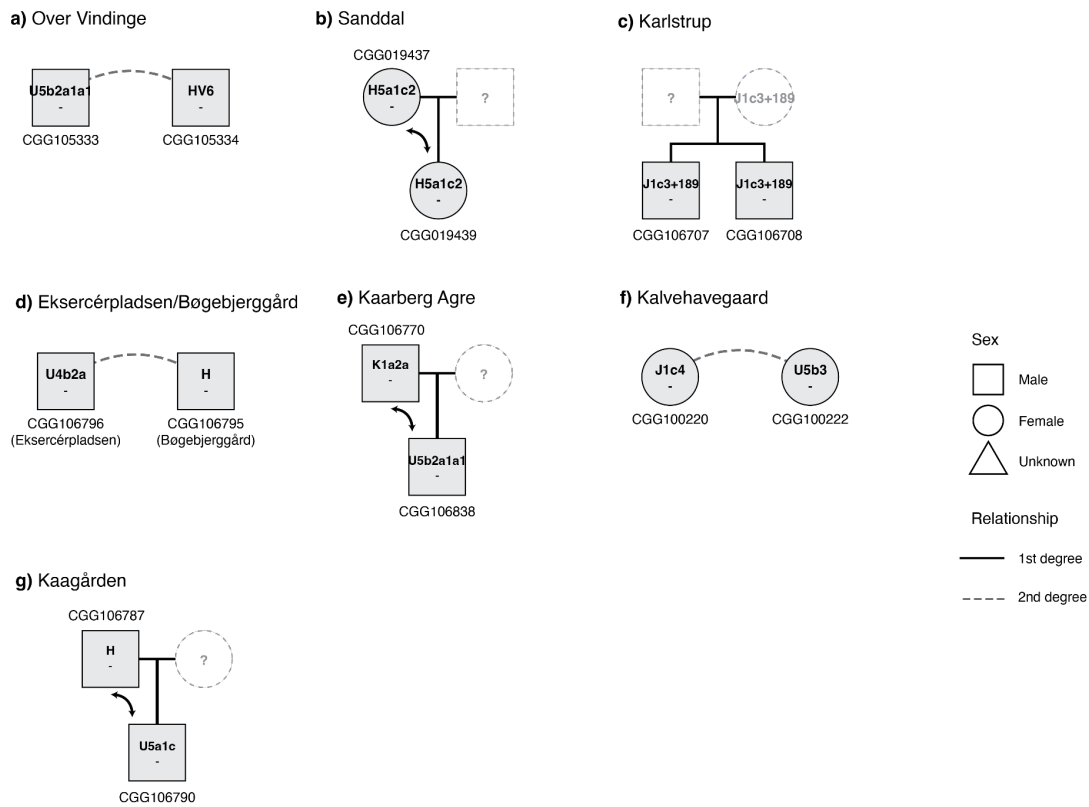

1472

1473

1474

1475

1476

Figure S6.6.2. Pedigrees from Denmark (part 2). Pedigrees were constructed manually, based on results from ngsRelate. Solid black line indicates first degree relationships, whereas stippled line indicates unknown second-degree relationships. Shape for each individual indicates sex. Mitochondrial haplogroup is denoted inside the shape for each individual.

## Norway

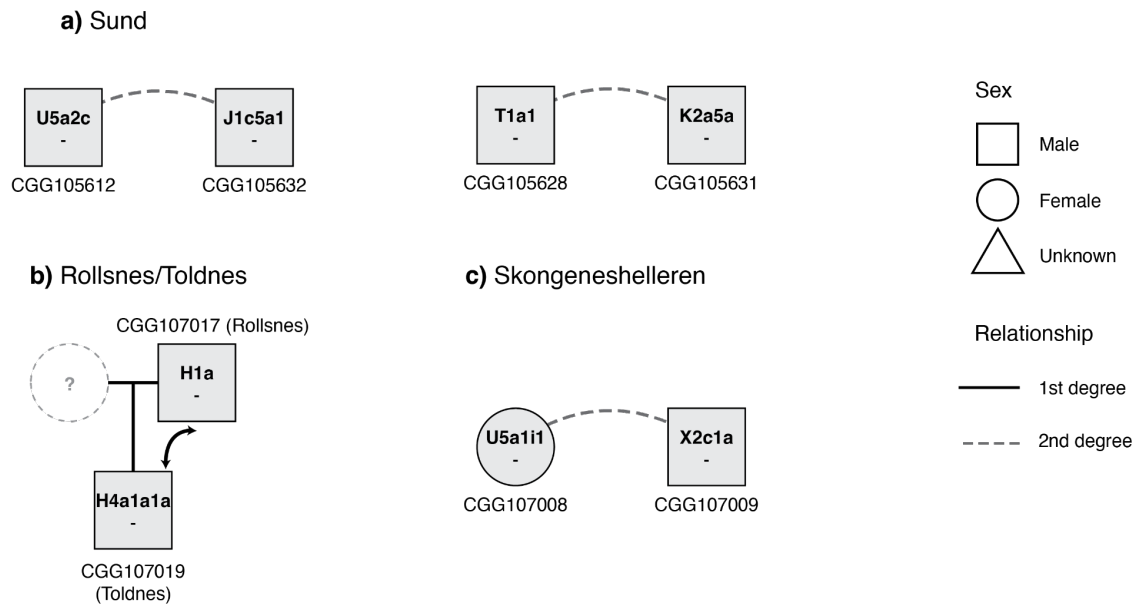

Figure S6.6.3. Pedigrees from Norway. Pedigrees were constructed manually, based on results from ngsRelate. Solid black line indicates first degree relationships, whereas stippled line indicates unknown second-degree relationships. The shape for each individual indicates sex. Mitochondrial haplogroup is denoted inside the shape for each individual. The incompatibility of the context dates between the Rollsnes and Toldnes individuals suggest C14 dating these individuals is required before the context can be properly understood.

Distance: 2.6 km

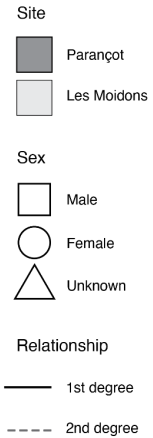

Figure S6.6.4. Pedigrees from Les Moidons and Parancot, France. Pedigrees were constructed manually, based on results from ngsRelate. Solid black line indicates first degree relationships, whereas stippled line indicates unknown second-degree relationships. Color and shape for each individual indicate site and sex respectively. Mitochondrial haplogroup is denoted inside the shape for each individual.

1491

# Bucy le Long, France

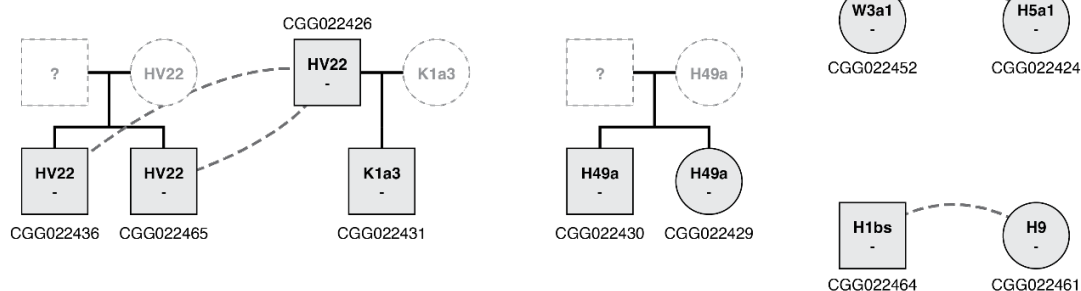

# Ayrmyrlyg, Russia

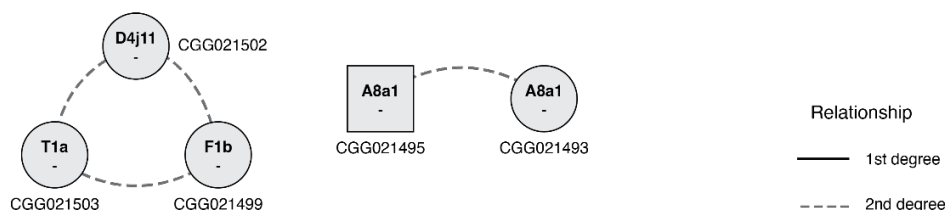

# Radovesice II, Czech Republic

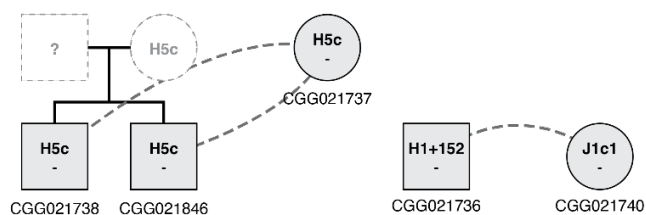

# Albäcksbacken, Sweden

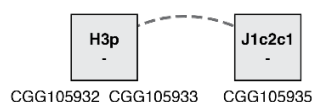

# Cifer-Pac, Slovakia

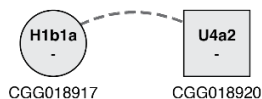

1492

1493

1494

1495

1496

Figure S6.6.5. Smaller pedigrees from various sites. Pedigrees were constructed manually, based on results from ngsRelate. Solid black line indicates first degree relationships, whereas stippled line indicates unknown second-degree relationships. Shape for each individual indicate sex. Mitochondrial haplogroup is denoted inside the shape for each individual.

## 1497 S6.7. Extended discussion

### 1498 S6.7.1 Genetic Outliers

1499 The combination of dense sampling and high resolution IBD modelling from the Iron Age  
1500 sources also allows for the identification of outliers and their origins within Scandinavia. From  
1501 Northern Jutland, 5 individuals cluster together with Iron Age Norwegians (CGG106489,  
1502 Sondrup Østergaard, Ulstrup sogn, CGG106503, Hyldebjerg, Vaarst  
1503 CGG106553, Hellevad, CGG106810, Mellemholm, CGG107417, Gammel Hasseris  
1504 Grusgrav), representing the contact between the two regions at a time in which crossing the sea  
1505 to the North was relatively easy compared to travelling south on land (Christiansen, 2017).  
1506 Throughout the Bronze and Iron Age, individuals with ancestral origins across the Baltic were  
1507 found in Norway and Denmark (CGG105601, CGG106751, CGG105643, CGG107034,  
1508 CGG106747, CGG106748, CGG106486\_CGG106491). Individuals from the Salme Viking  
1509 burial on the Island of Saaremaa cluster together with and are modelled with similar profiles to  
1510 those of Iron Age of Central Sweden rather than the later Vikings, supporting origins in the  
1511 Mälaren valley of Sweden. At Kalmargården, two beheaded individuals appear to be non-  
1512 locals, one (CGG107579, 2654/79, East) clustering with and modelled with ancestry of  
1513 Norway, and the second (CGG107580, 2654/79, West) of the Baltic region. In pre-Viking  
1514 Norway, as early as ~1240 BP we find individuals with Celtic British Isles ancestry,  
1515 representing early migration between the two regions.

1516

### 1517 S6.7.2 The Netherlands

1518 The Bell Beaker sub-cluster 0\_2\_1\_2 WEuIsMl located primarily from the Eastern North Sea  
1519 (ENS) region (present day the Netherlands) is unique in its high NWHG ancestry, low  
1520 European Farmer, and inability to be modelled primarily as Bell Beaker ancestry, like most  
1521 others from Bell Beaker sub-clusters (Figure S6.3.6).

1522

1523 When using early representatives of this cluster as a source, we see a large degree of genetic  
1524 continuity from 3700 - 1700 BP. From Valkenburg (ZH) however, there are a number of  
1525 individuals that do not fit the profile. The Roman cemetery Valkenburg Marktveld, located  
1526 south of the auxiliary fort, was used between 50 – 300 CE for the entire military community  
1527 that consisted of men, women and children, who lived in the vicinity of the auxiliary fort. Over  
1528 650 individuals were recovered, 145 of which are inhumations (41 adults, 104 children and

1529 infants); an extraordinary number as cremation dominates the Roman burial record in the  
1530 Netherlands. The individuals included in this study are possibly associated with different  
1531 departments of the Roman army, so the presence of non-local individuals is not unexpected  
1532 (DeCoster et al., in prep.). For the individuals that do not fit the local profile, most are Celtic  
1533 (similar to contemporaneous people from British Isles or France and one is similar to people  
1534 deriving their ancestry from the Bronze Age Eastern Mediterranean. A single individual is  
1535 modelled with North East European ancestry.

1536

1537 A transition by at least 1612 BP is apparent, Frisian individuals are modelled primarily as  
1538 Southern Scandinavian ancestries, but possessing small amounts of the local ENS ancestry.

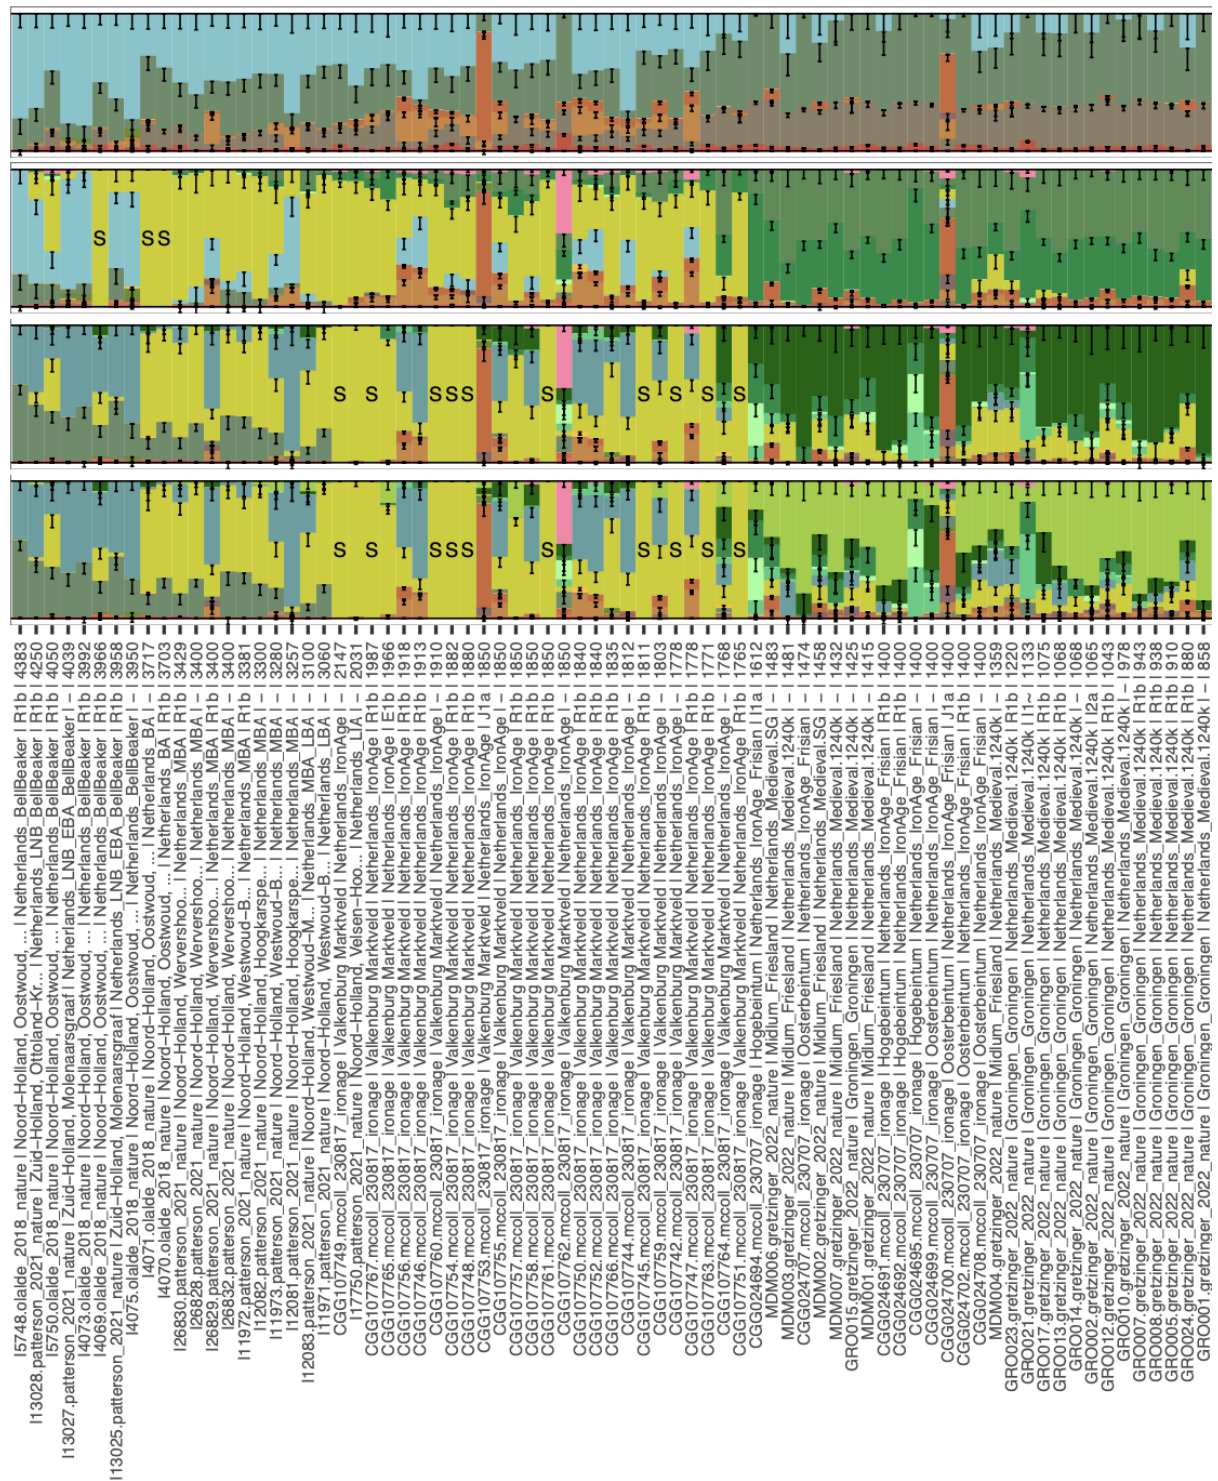

Figure S6.7.2.1. Subset of Mixture Modelling Results from Figure S6.3.1, for the Netherlands



#### S6.7.4 Norway

As discussed in Supplementary Note S6.2.2 and shown in Figure S6.2.2.1A, from the Bronze Age the expansions of Eastern Scandinavians had a large impact on the population structure of Norway. Despite only a few % of local Bronze Age Norwegian ancestry being present in Iron Age in Norway, we see the majority of Norwegian individuals from the Bronze Age, Iron Age and Viking Period clustering within the deep 0\_1\_6 Corded Ware (North) sub-cluster. This appears to result from some admixed late Bronze Age individuals within this cluster who are modelled with ~50% local Bronze Age ancestry, and who themselves model 50% of the Iron Age Ancestry (Figure S6.2.2.1A). The remaining 50% is Eastern Scandinavian BA ancestry, suggesting multiple waves or constant migration from the east to the west by the Iron Age. From the Iron Age onwards, there seems to be genetic continuity through the Viking period. Unlike further south in Scandinavia, the Vikings in Norway appear to descend from the local Iron Age individuals.

In addition to the interactions between Jutland and Norway (Supplementary Note S6.7.1), we also find evidence of interactions with Celtic Britain and Ireland, during the Late Iron Age and Migration Period. Many of these individuals are not admixed with the local Norwegians, suggesting they are visitors, first generation migrations, or remain genetically isolated from the local populations.

#### S6.7.5 Langobards and Goths

To compare with the recently published (Stolarek *et al.*, 2023) genomes, we generated a new panel of imputed genomes and re-clustered with the additional genomes as described in Supplementary Notes S5 and S6. We re-ran mixture modelling using the same source and target clusters as described in S6, but with the new samples in additional target clusters. Our results can be seen in Figure S6.7.6.1 and S6.7.6.2, and further reinforce our previous results.

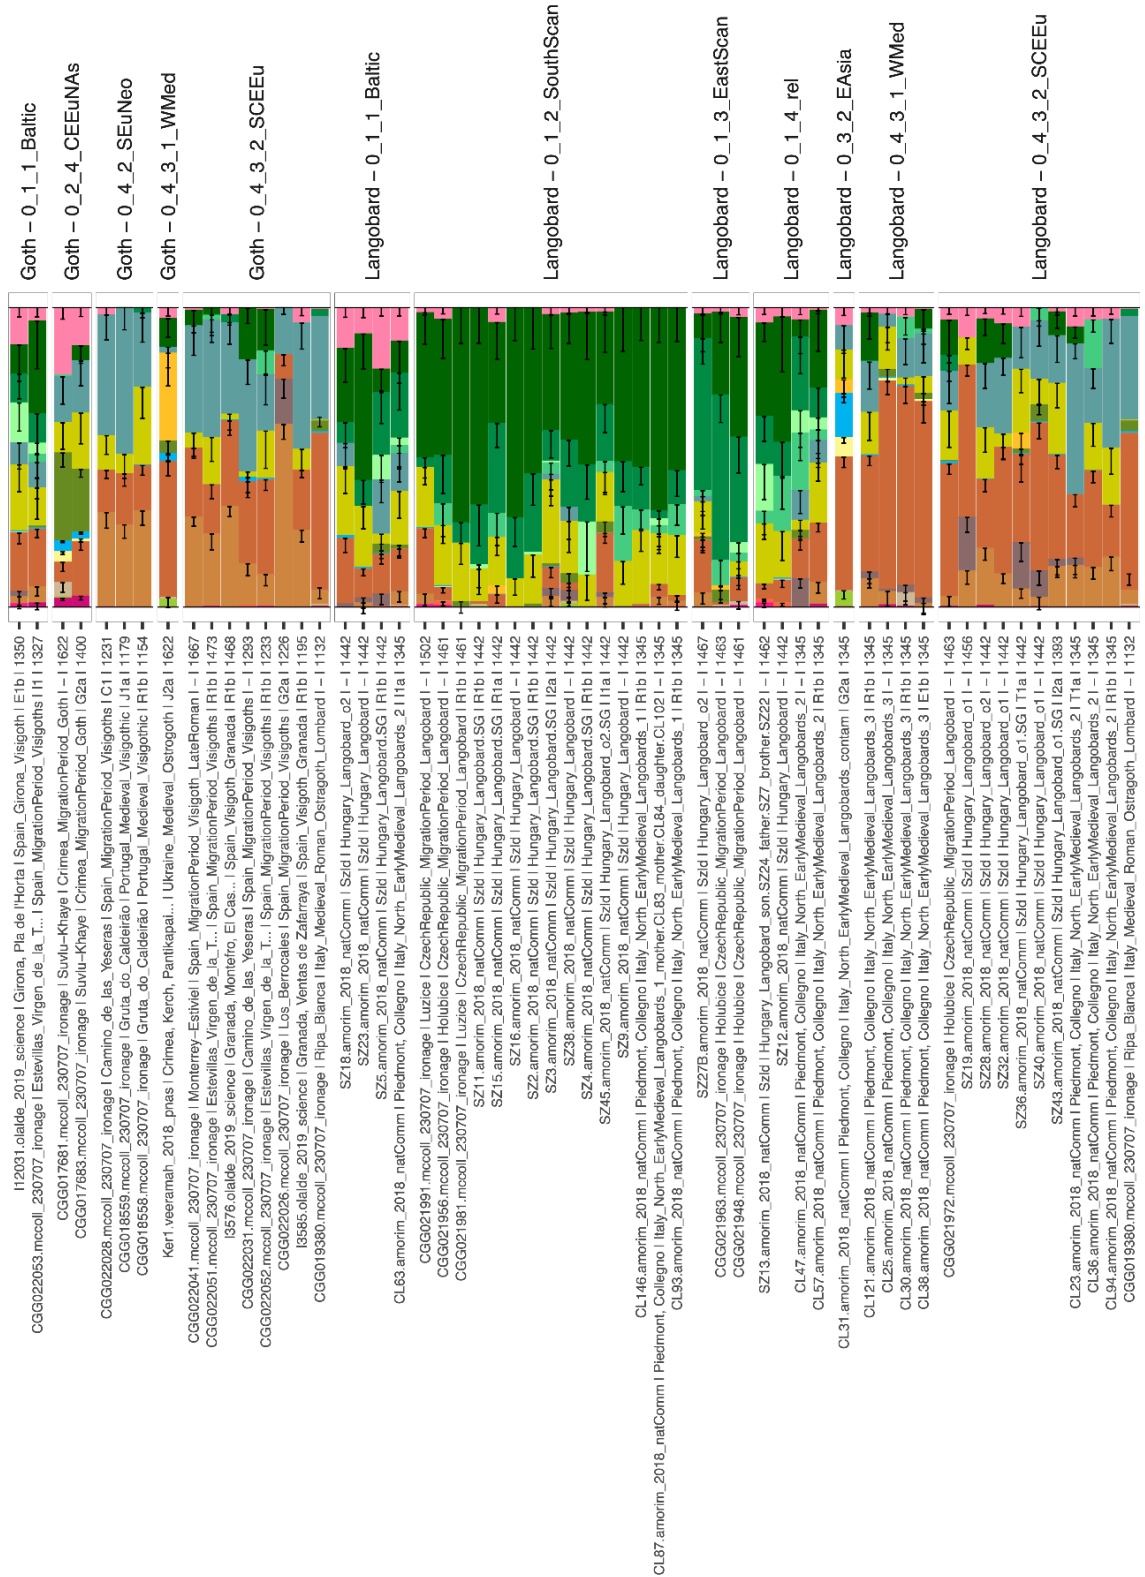

Figure S6.7.6.1 Mixture Modelling Results (Set 7) for Langobards and Goth, faceted by broad IBD clusters.

1582  
1583  
1584  
1585  
  
1586  
1587  
1588  
1589  
1590  
1591  
1592  
1593  
1594

### S6.7.7. Britain and Ireland

After the arrival of Southern Scandinavian ancestry to the British Isles around 1500 BP, the majority of samples are modelled with North Germanic (Mecklenburg) ancestry and fall within the Southern Scandinavian subclusters 0\_1\_2\_1 (n= 80), 0\_1\_2\_2 (n= 18), 0\_1\_2\_4 (n=1) and 0\_1\_2\_5 (n=25).

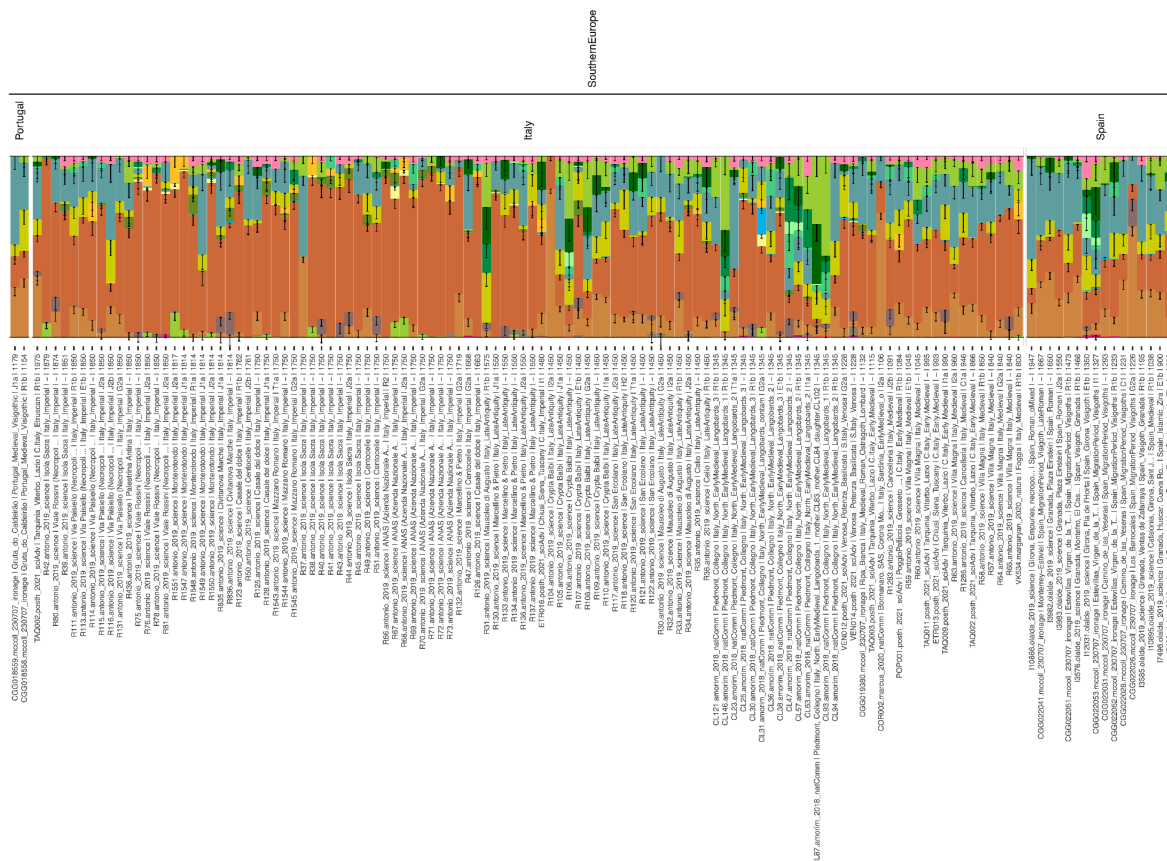

Figure S6.7.7. Full set of mixture modelling results for set X for Britain and its Isles.

There are a number of individuals present that otherwise cluster with individuals from Northern Europe. Throughout the Saxon and Viking periods, n = 11 individuals fall within the Southern Scandinavian - Jutland sub cluster (0\_1\_2\_3). The remaining individuals are primarily from the Viking period: the Baltic cluster (0\_1\_1, n = 1), the Eastern Scandinavian cluster (0\_1\_3, n = 5), the Western Scandinavian sub-cluster (n = 14)

These outlier individuals, their age (BP) and specific subcluster are listed below.

|                                         |         |                        |      |                       |  |
|-----------------------------------------|---------|------------------------|------|-----------------------|--|
| Baltic-cluster                          |         |                        |      |                       |  |
| VK145.margaryan_2020_nature             | England | Britain_VikingAge      | 1010 | 0_1_1_2_2800-         |  |
| Eastern Scandinavian                    |         |                        |      |                       |  |
| BUK037.gretzinger_2022_nature           | England | England_Medieval.1240k | 1350 | 0_1_3_1_2_1_1_2800-   |  |
| VK176.margaryan_2020_nature             | England | Britain_VikingAge      | 1010 | 0_1_3_1_2800-         |  |
| VK175.margaryan_2020_nature             | England | Britain_VikingAge      | 1010 | 0_1_3_1_1_2_2_2800-   |  |
| VK174.margaryan_2020_nature             | England | Britain_VikingAge      | 1010 | 0_1_3_1_2800-         |  |
| VK168.margaryan_2020_nature             | England | Britain_VikingAge      | 1010 | 0_1_3_1_2800-         |  |
| Southern Scandinavian - Jutland cluster |         |                        |      |                       |  |
| HAD002.gretzinger_2022_nature           | England | England_Medieval.SG    | 1472 | 0_1_2_3_2800-         |  |
| BUK039.gretzinger_2022_nature           | England | England_Medieval.1240k | 1470 | 0_1_2_3_2_1_2_2800-   |  |
| I20654.gretzinger_2022_nature           | England | England_Medieval.1240k | 1450 | 0_1_2_3_4_2_2800-     |  |
| I20674.gretzinger_2022_nature           | England | England_Medieval.1240k | 1400 | 0_1_2_3_4_2_2800-     |  |
| BUK057.gretzinger_2022_nature           | England | England_Medieval.1240k | 1350 | 0_1_2_3_2800-         |  |
| BUK040.gretzinger_2022_nature           | England | England_Medieval.1240k | 1350 | 0_1_2_3_1_2_2_2800-   |  |
| BUK030.gretzinger_2022_nature           | England | England_Medieval.1240k | 1350 | 0_1_2_3_2_1_1_2800-   |  |
| BUK029.gretzinger_2022_nature           | England | England_Medieval.1240k | 1350 | 0_1_2_3_2_1_2_2800-   |  |
| BUK001.gretzinger_2022_nature           | England | England_Medieval.1240k | 1350 | 0_1_2_3_2_1_2_2800-   |  |
| VK165.margaryan_2020_nature             | England | Britain_VikingAge      | 1010 | 0_1_2_3_2800-         |  |
| I3044.gretzinger_2022_nature            | England | England_Medieval.1240k | 895  | 0_1_2_3_2800-         |  |
| Western Scandinavian cluster            |         |                        |      |                       |  |
| VK546.margaryan_2020_nature             | Ireland | Ireland_Viking.SG      | 1100 | 0_1_6_2_2_1_1_1_2800- |  |
| VK172.margaryan_2020_nature             | England | Britain_VikingAge      | 1010 | 0_1_6_2_2800-         |  |
| VK144.margaryan_2020_nature             | England | Britain_VikingAge      | 1010 | 0_1_6_6_2800-         |  |
| VK544.margaryan_2020_nature             | Ireland | Ireland_Medieval       | 1000 | 0_1_6_2_2_3_2_2800-   |  |
| VK543.margaryan_2020_nature             | Ireland | Ireland_Medieval       | 1000 | 0_1_6_1_1_2800-       |  |
| VK449.margaryan_2020_nature             | England | Britain_VikingAge      | 953  | 0_1_6_1_3_2800-       |  |
| VK263.margaryan_2020_nature             | England | Britain_VikingAge      | 953  | 0_1_6_1_1_2_2_2800-   |  |

|      |                             |           |                   |     |                     |
|------|-----------------------------|-----------|-------------------|-----|---------------------|
| 1640 | VK262.margaryan_2020_nature | England   | Britain_VikingAge | 953 | 0_1_6_1_1_2_1_2800- |
| 1641 | VK260.margaryan_2020_nature | England   | Britain_VikingAge | 953 | 0_1_6_1_1_2800-     |
| 1642 | VK259.margaryan_2020_nature | England   | Britain_VikingAge | 953 | 0_1_6_1_3_2800-     |
| 1643 | VK258.margaryan_2020_nature | England   | Britain_VikingAge | 953 | 0_1_6_2_1_1_2_2800- |
| 1644 | VK257.margaryan_2020_nature | England   | Britain_VikingAge | 953 | 0_1_6_2_5_2_2800-   |
| 1645 | VK170.margaryan_2020_nature | IsleOfMan | Britain_VikingAge | 950 | 0_1_6_2_2800-       |
| 1646 | VK204.margaryan_2020_nature | Scotland  | Britain_VikingAge | 900 | 0_1_6_7_1_2800-     |

1647

1648

#### 1649 S6.7.8. Ayrmyrlyg

1650 The site of Ayrmyrlyg in Russia around 2200 BP is home to individuals from both the Saka  
1651 and Hun cultures. Under IBD Mixture Modelling Set 5, the Saka individuals are modelled with  
1652 similar ancestry proportions to the Sakas of Kazakhstan and Kyrgyzstan, with ~50% Steppe  
1653 ancestry, smaller proportions of Iranian, Neolithic Farming and Caucasus Hunter Gatherer  
1654 and Eastern Hunter-gatherer ancestry. Of the Huns, two are modelled here entirely as East  
1655 Asian ancestry (light blue), similar to the Hun from Kazakhstan. The third Hun is modelled  
1656 similar to the Saka (CGG021500), and the last has proportions expected from an individual  
1657 deriving 50% of their ancestry from an East Asian source, and 50% from a Saka source.

1658  
1659  
1660  
1661

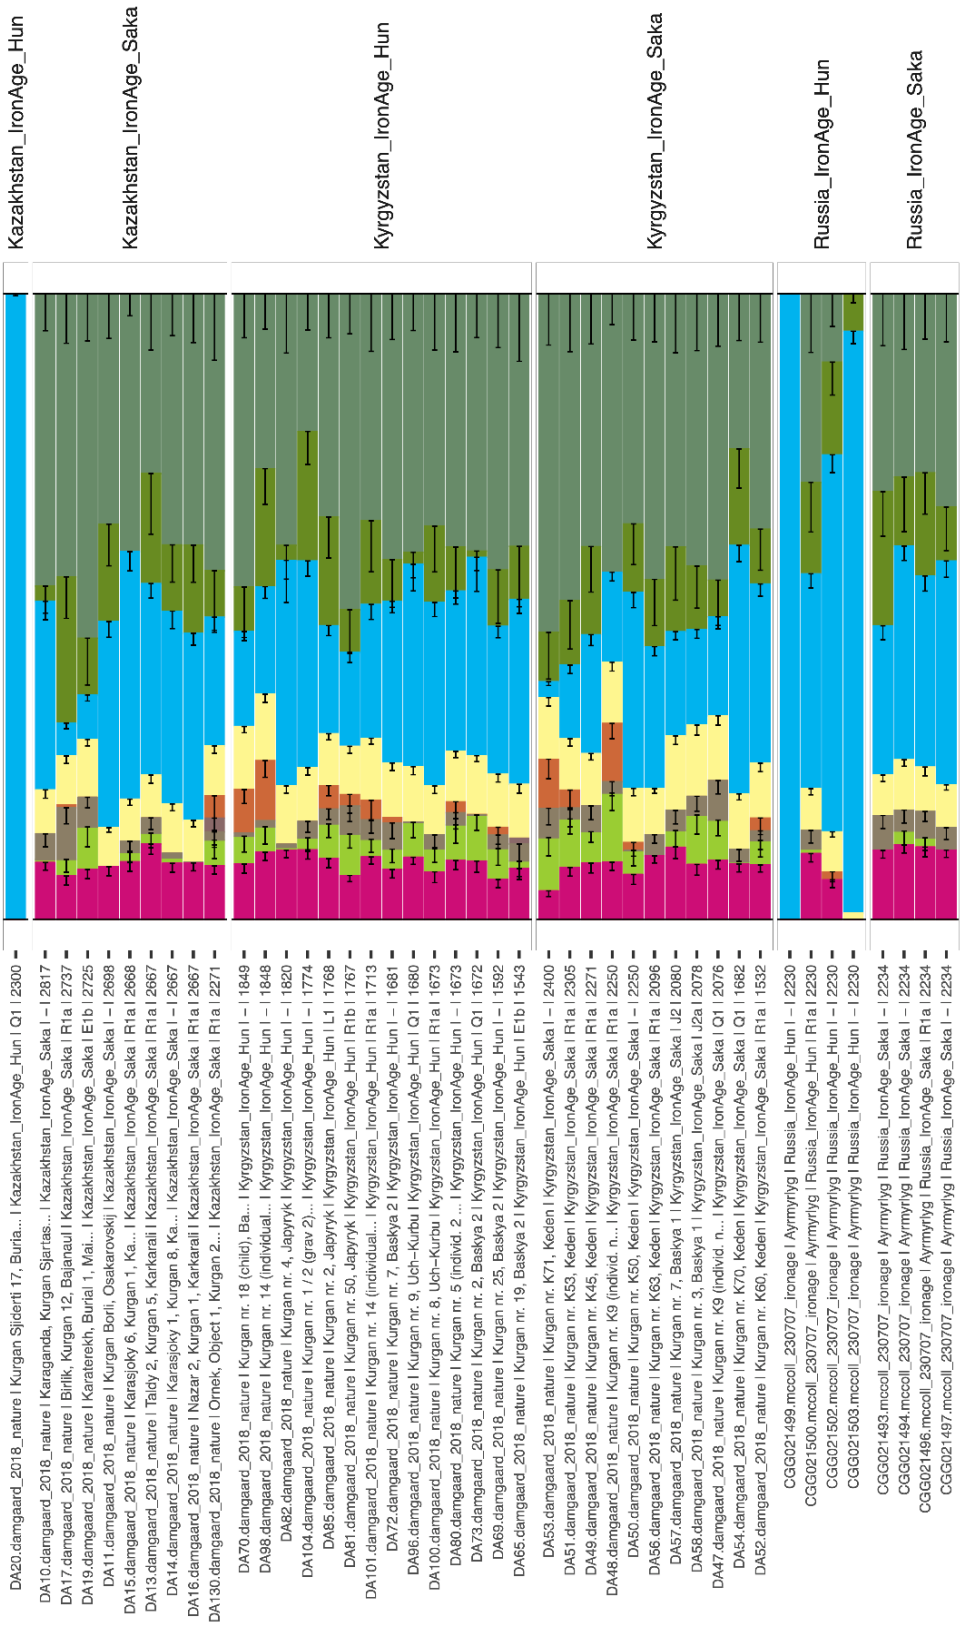

1662

1663

- 1664 Allentoft, M.E. *et al.* (2015) 'Population genomics of Bronze Age Eurasia', *Nature*,  
1665 522(7555), pp. 167–172. Available at: <https://doi.org/10.1038/nature14507>.
- 1666 Allentoft, M.E. *et al.* (2022) 'Population Genomics of Stone Age Eurasia'. *Evolutionary*  
1667 *Biology*. Available at: <https://doi.org/10.1101/2022.05.04.490594>.
- 1668 Allentoft, M.E., Sikora, M., Fischer, A., *et al.* (2024) '100 ancient genomes show repeated  
1669 population turnovers in Neolithic Denmark', *Nature*, 625(7994), pp. 329–337. Available at:  
1670 <https://doi.org/10.1038/s41586-023-06862-3>.
- 1671 Allentoft, M.E., Sikora, M., Refoyo-Martínez, A., *et al.* (2024) 'Population genomics of post-  
1672 glacial western Eurasia', *Nature*, 625(7994), pp. 301–311. Available at:  
1673 <https://doi.org/10.1038/s41586-023-06865-0>.
- 1674 Amorim, C.E.G. *et al.* (2018) 'Understanding 6th-century barbarian social organization and  
1675 migration through paleogenomics', *Nature Communications*, 9(1), p. 3547. Available at:  
1676 <https://doi.org/10.1038/s41467-018-06024-4>.
- 1677 Antonio, M.L. *et al.* (2019) 'Ancient Rome: A genetic crossroads of Europe and the  
1678 Mediterranean', *Science*, 366(6466), pp. 708–714. Available at:  
1679 <https://doi.org/10.1126/science.aay6826>.
- 1680 Auton, A. *et al.* (2015) 'A global reference for human genetic variation', *Nature*, 526(7571),  
1681 pp. 68–74. Available at: <https://doi.org/10.1038/nature15393>.
- 1682 Barrie, W. *et al.* (2024) 'Elevated genetic risk for multiple sclerosis emerged in steppe  
1683 pastoralist populations', *Nature*, 625(7994), pp. 321–328. Available at:  
1684 <https://doi.org/10.1038/s41586-023-06618-z>.
- 1685 de Barros Damgaard, P. *et al.* (2018) 'The first horse herders and the impact of early Bronze  
1686 Age steppe expansions into Asia', *Science*, 360(6396), p. eaar7711. Available at:  
1687 <https://doi.org/10.1126/science.aar7711>.
- 1688 Brace, S. *et al.* (2019) 'Ancient genomes indicate population replacement in Early Neolithic  
1689 Britain', *Nature Ecology & Evolution*, 3(5), pp. 765–771. Available at:  
1690 <https://doi.org/10.1038/s41559-019-0871-9>.
- 1691 Broushaki, F. *et al.* (2016) 'Early Neolithic genomes from the eastern Fertile Crescent',  
1692 *Science*, 353(6298), pp. 499–503. Available at: <https://doi.org/10.1126/science.aaf7943>.
- 1693 Browning, B.L. and Browning, S.R. (2013) 'Detecting Identity by Descent and Estimating  
1694 Genotype Error Rates in Sequence Data', *The American Journal of Human Genetics*, 93(5),  
1695 pp. 840–851. Available at: <https://doi.org/10.1016/j.ajhg.2013.09.014>.
- 1696 Brunel, S. *et al.* (2020) 'Ancient genomes from present-day France unveil 7,000 years of its  
1697 demographic history', *Proceedings of the National Academy of Sciences*, 117(23), pp.  
1698 12791–12798. Available at: <https://doi.org/10.1073/pnas.1918034117>.
- 1699 Cassidy, L.M. *et al.* (2016) 'Neolithic and Bronze Age migration to Ireland and establishment  
1700 of the insular Atlantic genome', *Proceedings of the National Academy of Sciences*, 113(2),  
1701 pp. 368–373. Available at: <https://doi.org/10.1073/pnas.1518445113>.
- 1702 Cassidy, L.M. *et al.* (2020) 'A dynastic elite in monumental Neolithic society', *Nature*,  
1703 582(7812), pp. 384–388. Available at: <https://doi.org/10.1038/s41586-020-2378-6>.
- 1704 Christiansen, T.T. (2017) *The Productive Limfjord Region in perspective: A Study of Metal*  
1705 *Detecting Sites and Socioeconomic Development in Denmark, AD 400-1150*. Aarhus  
1706 University. Available at: [https://nordjyskemuseer.dk/den-fundrige-limfjordsregion-i-](https://nordjyskemuseer.dk/den-fundrige-limfjordsregion-i-perspektiv/)  
1707 [perspektiv/](https://nordjyskemuseer.dk/den-fundrige-limfjordsregion-i-perspektiv/) (Accessed: 11 December 2023).
- 1708 Clemente, F. *et al.* (2021) 'The genomic history of the Aegean palatial civilizations', *Cell*,  
1709 184(10), pp. 2565–2586.e21. Available at: <https://doi.org/10.1016/j.cell.2021.03.039>.
- 1710 Coutinho, A. *et al.* (2020) 'The Neolithic Pitted Ware culture foragers were culturally but not

1711 genetically influenced by the Battle Axe culture herders', *American Journal of Physical*  
1712 *Anthropology*, 172(4), pp. 638–649. Available at: <https://doi.org/10.1002/ajpa.24079>.  
1713 Damgaard, P. de B. *et al.* (2018) '137 ancient human genomes from across the Eurasian  
1714 steppes', *Nature*, 557(7705), pp. 369–374. Available at: [https://doi.org/10.1038/s41586-018-](https://doi.org/10.1038/s41586-018-0094-2)  
1715 [0094-2](https://doi.org/10.1038/s41586-018-0094-2).  
1716 Ebenesersdóttir, S.S. *et al.* (2018) 'Ancient genomes from Iceland reveal the making of a  
1717 human population', *Science*, 360(6392), pp. 1028–1032. Available at:  
1718 <https://doi.org/10.1126/science.aar2625>.  
1719 Egffjord, A.F.-H. *et al.* (2021) 'Genomic Steppe ancestry in skeletons from the Neolithic  
1720 Single Grave Culture in Denmark', *PLOS ONE*, 16(1), p. e0244872. Available at:  
1721 <https://doi.org/10.1371/journal.pone.0244872>.  
1722 Fernandes, D.M. *et al.* (2018) 'A genomic Neolithic time transect of hunter-farmer admixture  
1723 in central Poland', *Scientific Reports*, 8(1), p. 14879. Available at:  
1724 <https://doi.org/10.1038/s41598-018-33067-w>.  
1725 Fernandes, D.M. *et al.* (2020) 'The spread of steppe and Iranian-related ancestry in the  
1726 islands of the western Mediterranean', *Nature Ecology & Evolution*, 4(3), pp. 334–345.  
1727 Available at: <https://doi.org/10.1038/s41559-020-1102-0>.  
1728 Fischer, C.-E. *et al.* (2022) 'Origin and mobility of Iron Age Gaulish groups in present-day  
1729 France revealed through archaeogenomics', *iScience*, 25(4). Available at:  
1730 <https://doi.org/10.1016/j.isci.2022.104094>.  
1731 Fregel, R. *et al.* (2018) 'Ancient genomes from North Africa evidence prehistoric migrations  
1732 to the Maghreb from both the Levant and Europe', *Proceedings of the National Academy of*  
1733 *Sciences*, 115(26), pp. 6774–6779. Available at: <https://doi.org/10.1073/pnas.1800851115>.  
1734 Fu, Q. *et al.* (2014) 'Genome sequence of a 45,000-year-old modern human from western  
1735 Siberia', *Nature*, 514(7523), pp. 445–449. Available at: <https://doi.org/10.1038/nature13810>.  
1736 Fu, Q. *et al.* (2016) 'The genetic history of Ice Age Europe', *Nature*. Available at:  
1737 <https://doi.org/10.1038/nature17993>.  
1738 Furtwängler, A. *et al.* (2020) 'Comparison of target enrichment strategies for ancient  
1739 pathogen DNA', *BioTechniques*, 69(6), pp. 455–459. Available at:  
1740 <https://doi.org/10.2144/btn-2020-0100>.  
1741 Gallego-Llorente, M. *et al.* (2016) 'The genetics of an early Neolithic pastoralist from the  
1742 Zagros, Iran', *Scientific Reports*, 6(1), p. 31326. Available at:  
1743 <https://doi.org/10.1038/srep31326>.  
1744 Gamba, C. *et al.* (2014) 'Genome flux and stasis in a five millennium transect of European  
1745 prehistory', *Nature Communications*, 5(1), p. 5257. Available at:  
1746 <https://doi.org/10.1038/ncomms6257>.  
1747 González-Fortes, G. *et al.* (2017) 'Paleogenomic Evidence for Multi-generational Mixing  
1748 between Neolithic Farmers and Mesolithic Hunter-Gatherers in the Lower Danube Basin',  
1749 *Current Biology*, 27(12), pp. 1801–1810.e10. Available at:  
1750 <https://doi.org/10.1016/j.cub.2017.05.023>.  
1751 González-Fortes, G. *et al.* (2019) 'A western route of prehistoric human migration from  
1752 Africa into the Iberian Peninsula', *Proceedings of the Royal Society B: Biological Sciences*,  
1753 286(1895), p. 20182288. Available at: <https://doi.org/10.1098/rspb.2018.2288>.  
1754 Greenbaum, G. *et al.* (2019) 'Network-based hierarchical population structure analysis for  
1755 large genomic data sets', *Genome Research*, 29(12), pp. 2020–2033. Available at:  
1756 <https://doi.org/10.1101/gr.250092.119>.  
1757 Gretzinger, J. *et al.* (2022) 'The Anglo-Saxon migration and the formation of the early  
1758 English gene pool', *Nature*, 610(7930), pp. 112–119. Available at:  
1759 <https://doi.org/10.1038/s41586-022-05247-2>.  
1760 Günther, T. *et al.* (2015) 'Ancient genomes link early farmers from Atapuerca in Spain to



1761 modern-day Basques', *Proceedings of the National Academy of Sciences*, 112(38), pp.  
 1762 11917–11922. Available at: <https://doi.org/10.1073/pnas.1509851112>.  
 1763 Günther, T. *et al.* (2018) 'Population genomics of Mesolithic Scandinavia: Investigating early  
 1764 postglacial migration routes and high-latitude adaptation', *PLOS Biology*, 16(1), p. e2003703.  
 1765 Available at: <https://doi.org/10.1371/journal.pbio.2003703>.  
 1766 Haber, M. *et al.* (2017) 'Continuity and Admixture in the Last Five Millennia of Levantine  
 1767 History from Ancient Canaanite and Present-Day Lebanese Genome Sequences', *The*  
 1768 *American Journal of Human Genetics*, 101(2), pp. 274–282. Available at:  
 1769 <https://doi.org/10.1016/j.ajhg.2017.06.013>.  
 1770 Haber, M. *et al.* (2019) 'A Transient Pulse of Genetic Admixture from the Crusaders in the  
 1771 Near East Identified from Ancient Genome Sequences', *The American Journal of Human*  
 1772 *Genetics*, 104(5), pp. 977–984. Available at: <https://doi.org/10.1016/j.ajhg.2019.03.015>.  
 1773 Hansen, H.B. *et al.* (2017) 'Comparing Ancient DNA Preservation in Petrous Bone and  
 1774 Tooth Cementum', *PLoS One*. Available at: <https://doi.org/10.1371/journal.pone.0170940>.  
 1775 Hofmanová, Z. *et al.* (2016) 'Early farmers from across Europe directly descended from  
 1776 Neolithic Aegeans', *Proceedings of the National Academy of Sciences*, 113(25), pp. 6886–  
 1777 6891. Available at: <https://doi.org/10.1073/pnas.1523951113>.  
 1778 Järve, M. *et al.* (2019) 'Shifts in the Genetic Landscape of the Western Eurasian Steppe  
 1779 Associated with the Beginning and End of the Scythian Dominance', *Current Biology*,  
 1780 29(14), pp. 2430–2441.e10. Available at: <https://doi.org/10.1016/j.cub.2019.06.019>.  
 1781 Jensen, T.Z.T. *et al.* (2019) 'A 5700 year-old human genome and oral microbiome from  
 1782 chewed birch pitch', *Nature Communications*, 10(1), p. 5520. Available at:  
 1783 <https://doi.org/10.1038/s41467-019-13549-9>.  
 1784 Jones, E.R. *et al.* (2015) 'Upper Palaeolithic genomes reveal deep roots of modern  
 1785 Eurasians', *Nature Communications*, 6(1), p. 8912. Available at:  
 1786 <https://doi.org/10.1038/ncomms9912>.  
 1787 Jones, E.R. *et al.* (2017) 'The Neolithic Transition in the Baltic Was Not Driven by  
 1788 Admixture with Early European Farmers', *Current Biology*, 27(4), pp. 576–582. Available at:  
 1789 <https://doi.org/10.1016/j.cub.2016.12.060>.  
 1790 Kanzawa-Kiriyama, H. *et al.* (2019) 'Late Jomon male and female genome sequences from  
 1791 the Funadomari site in Hokkaido, Japan', *Anthropological Science*, 127(2), pp. 83–108.  
 1792 Available at: <https://doi.org/10.1537/ase.190415>.  
 1793 Kashuba, N. *et al.* (2019) 'Ancient DNA from mastics solidifies connection between material  
 1794 culture and genetics of mesolithic hunter–gatherers in Scandinavia', *Communications*  
 1795 *Biology*, 2(1), pp. 1–10. Available at: <https://doi.org/10.1038/s42003-019-0399-1>.  
 1796 Katoh, K. and Standley, D.M. (2013) 'MAFFT Multiple Sequence Alignment Software  
 1797 Version 7: Improvements in Performance and Usability', *Molecular Biology and Evolution*,  
 1798 30(4), pp. 772–780. Available at: <https://doi.org/10.1093/molbev/mst010>.  
 1799 Kılınç, G.M. *et al.* (2016) 'The Demographic Development of the First Farmers in Anatolia',  
 1800 *Current Biology*, 26(19), pp. 2659–2666. Available at:  
 1801 <https://doi.org/10.1016/j.cub.2016.07.057>.  
 1802 Kılınç, G.M. *et al.* (2021) 'Human population dynamics and Yersinia pestis in ancient  
 1803 northeast Asia', *Science Advances*, 7(2), p. eabc4587. Available at:  
 1804 <https://doi.org/10.1126/sciadv.abc4587>.  
 1805 Kozlov, A.M. *et al.* (2019) 'RAxML-NG: a fast, scalable and user-friendly tool for maximum  
 1806 likelihood phylogenetic inference', *Bioinformatics*, 35(21), pp. 4453–4455. Available at:  
 1807 <https://doi.org/10.1093/bioinformatics/btz305>.  
 1808 Krzewińska, M., Kılınç, G.M., *et al.* (2018) 'Ancient genomes suggest the eastern Pontic-  
 1809 Caspian steppe as the source of western Iron Age nomads', *Science Advances*, 4(10), p.  
 1810 eaat4457. Available at: <https://doi.org/10.1126/sciadv.aat4457>.

1811 Krzewińska, M., Kjellström, A., *et al.* (2018) ‘Genomic and Strontium Isotope Variation  
1812 Reveal Immigration Patterns in a Viking Age Town’, *Current Biology*, 28(17), pp. 2730-  
1813 2738.e10. Available at: <https://doi.org/10.1016/j.cub.2018.06.053>.  
1814 Lazaridis, I. *et al.* (2014) ‘Ancient human genomes suggest three ancestral populations for  
1815 present-day Europeans’, *Nature*, 513(7518), pp. 409–413. Available at:  
1816 <https://doi.org/10.1038/nature13673>.  
1817 Lazaridis, I. *et al.* (2022) ‘The genetic history of the Southern Arc: A bridge between West  
1818 Asia and Europe’, *Science*, 377(6609), p. eabm4247. Available at:  
1819 <https://doi.org/10.1126/science.abm4247>.  
1820 Li, H. (2011) ‘A statistical framework for SNP calling, mutation discovery, association  
1821 mapping and population genetical parameter estimation from sequencing data’,  
1822 *Bioinformatics*, 27(21), pp. 2987–2993. Available at:  
1823 <https://doi.org/10.1093/bioinformatics/btr509>.  
1824 Linderholm, A. *et al.* (2020) ‘Cord Ware cultural complexity uncovered using genomic and  
1825 isotopic analysis from south-eastern Poland’, *Scientific Reports*, 10(1), p. 6885. Available at:  
1826 <https://doi.org/10.1038/s41598-020-63138-w>.  
1827 Lindo, J. *et al.* (2018) ‘The genetic prehistory of the Andean highlands 7000 years BP though  
1828 European contact’, *Science Advances*, 4(11), p. eaau4921. Available at:  
1829 <https://doi.org/10.1126/sciadv.aau4921>.  
1830 Lipson, M. and Reich, D. (2017) ‘A working model of the deep relationships of diverse  
1831 modern human genetic lineages outside of Africa’, *Molecular Biology and Evolution*, p.  
1832 msw293. Available at: <https://doi.org/10.1093/molbev/msw293>.  
1833 Llorente, M.G. *et al.* (2015) ‘Ancient Ethiopian genome reveals extensive Eurasian  
1834 admixture in Eastern Africa’, *Science*, 350(6262), pp. 820–822. Available at:  
1835 <https://doi.org/10.1126/science.aad2879>.  
1836 Mallick, S. *et al.* (2023) ‘The Allen Ancient DNA Resource (AADR): A curated  
1837 compendium of ancient human genomes’. bioRxiv, p. 2023.04.06.535797. Available at:  
1838 <https://doi.org/10.1101/2023.04.06.535797>.  
1839 Malmström, H. *et al.* (2019) ‘The genomic ancestry of the Scandinavian Battle Axe Culture  
1840 people and their relation to the broader Cord Ware horizon’, *Proceedings of the Royal  
1841 Society B: Biological Sciences*, 286(1912), p. 20191528. Available at:  
1842 <https://doi.org/10.1098/rspb.2019.1528>.  
1843 Marcus, J.H. *et al.* (2020) ‘Genetic history from the Middle Neolithic to present on the  
1844 Mediterranean island of Sardinia’, *Nature Communications*, 11(1), p. 939. Available at:  
1845 <https://doi.org/10.1038/s41467-020-14523-6>.  
1846 Margaryan, A. *et al.* (2020) ‘Population genomics of the Viking world’, *Nature*, 585(7825),  
1847 pp. 390–396. Available at: <https://doi.org/10.1038/s41586-020-2688-8>.  
1848 Maróti, Z. *et al.* (2022) ‘The genetic origin of Huns, Avars, and conquering Hungarians’,  
1849 *Current Biology*, 32(13), pp. 2858–2870.e7. Available at:  
1850 <https://doi.org/10.1016/j.cub.2022.04.093>.  
1851 Martiniano, R. *et al.* (2016) ‘Genomic signals of migration and continuity in Britain before  
1852 the Anglo-Saxons’, *Nature Communications*, 7(1), p. 10326. Available at:  
1853 <https://doi.org/10.1038/ncomms10326>.  
1854 Martiniano, R. *et al.* (2017) ‘The population genomics of archaeological transition in west  
1855 Iberia: Investigation of ancient substructure using imputation and haplotype-based methods’,  
1856 *PLOS Genetics*, 13(7), p. e1006852. Available at:  
1857 <https://doi.org/10.1371/journal.pgen.1006852>.  
1858 Mathieson, I. *et al.* (2015) ‘Genome-wide patterns of selection in 230 ancient Eurasians’,  
1859 *Nature*, 528(7583), pp. 499–503. Available at: <https://doi.org/10.1038/nature16152>.  
1860 McColl, H. *et al.* (2018) ‘The prehistoric peopling of Southeast Asia’, *Science*, 361(6397),

1861 pp. 88–92. Available at: <https://doi.org/10.1126/science.aat3628>.  
 1862 Mittnik, A. *et al.* (2018) ‘The genetic prehistory of the Baltic Sea region’, *Nature*  
 1863 *Communications*, 9(1), p. 442. Available at: <https://doi.org/10.1038/s41467-018-02825-9>.  
 1864 Moots, H.M. *et al.* (2023) ‘A genetic history of continuity and mobility in the Iron Age  
 1865 central Mediterranean’, *Nature Ecology & Evolution*, pp. 1–10. Available at:  
 1866 <https://doi.org/10.1038/s41559-023-02143-4>.  
 1867 Moreno-Mayar, J.V., Vinner, L., *et al.* (2018) ‘Early human dispersals within the Americas’,  
 1868 *Science*, 362(6419), p. eaav2621. Available at: <https://doi.org/10.1126/science.aav2621>.  
 1869 Moreno-Mayar, J.V., Potter, B.A., *et al.* (2018) ‘Terminal Pleistocene Alaskan genome  
 1870 reveals first founding population of Native Americans’, *Nature*, 553(7687), pp. 203–207.  
 1871 Available at: <https://doi.org/10.1038/nature25173>.  
 1872 Mota, B.S. da *et al.* (2022) ‘Imputation of ancient genomes’. bioRxiv, p. 2022.07.19.500636.  
 1873 Available at: <https://doi.org/10.1101/2022.07.19.500636>.  
 1874 Narasimhan, V.M. *et al.* (2019) ‘The formation of human populations in South and Central  
 1875 Asia’, *Science*, 365(6457), p. eaat7487. Available at: <https://doi.org/10.1126/science.aat7487>.  
 1876 Ning, C. *et al.* (2019) ‘Ancient Genomes Reveal Yamnaya-Related Ancestry and a Potential  
 1877 Source of Indo-European Speakers in Iron Age Tianshan’, *Current Biology*, 29(15), pp. 2526–  
 1878 2532.e4. Available at: <https://doi.org/10.1016/j.cub.2019.06.044>.  
 1879 Ning, C. *et al.* (2020) ‘Ancient genomes from northern China suggest links between  
 1880 subsistence changes and human migration’, *Nature Communications*, 11(1), p. 2700.  
 1881 Available at: <https://doi.org/10.1038/s41467-020-16557-2>.  
 1882 Olalde, I. *et al.* (2014) ‘Derived immune and ancestral pigmentation alleles in a 7,000-year-  
 1883 old Mesolithic European’, *Nature*, 507(7491), pp. 225–228. Available at:  
 1884 <https://doi.org/10.1038/nature12960>.  
 1885 Olalde, I. *et al.* (2015) ‘A Common Genetic Origin for Early Farmers from Mediterranean  
 1886 Cardial and Central European LBK Cultures’, *Molecular Biology and Evolution*, 32(12), pp.  
 1887 3132–3142. Available at: <https://doi.org/10.1093/molbev/msv181>.  
 1888 Olalde, I. *et al.* (2018) ‘The Beaker phenomenon and the genomic transformation of  
 1889 northwest Europe’, *Nature*, 555(7695), pp. 190–196. Available at:  
 1890 <https://doi.org/10.1038/nature25738>.  
 1891 Olalde, I. *et al.* (2019) ‘The genomic history of the Iberian Peninsula over the past 8000  
 1892 years’, *Science*, 363(6432), pp. 1230–1234. Available at:  
 1893 <https://doi.org/10.1126/science.aav4040>.  
 1894 Papac, L. *et al.* (2021) ‘Dynamic changes in genomic and social structures in third  
 1895 millennium BCE central Europe’, *Science Advances*, 7(35), p. eabi6941. Available at:  
 1896 <https://doi.org/10.1126/sciadv.abi6941>.  
 1897 Patterson, N. *et al.* (2022) ‘Large-scale migration into Britain during the Middle to Late  
 1898 Bronze Age’, *Nature*, 601(7894), pp. 588–594. Available at: [https://doi.org/10.1038/s41586-](https://doi.org/10.1038/s41586-021-04287-4)  
 1899 [021-04287-4](https://doi.org/10.1038/s41586-021-04287-4).  
 1900 Patterson, N., Price, A.L. and Reich, D. (2006) ‘Population structure and eigenanalysis’,  
 1901 *PLoS Genet.* Available at: <https://doi.org/10.1371/journal.pgen.0020190>.  
 1902 Posth, C. *et al.* (2021) ‘The origin and legacy of the Etruscans through a 2000-year  
 1903 archeogenomic time transect’, *Science Advances*, 7(39), p. eabi7673. Available at:  
 1904 <https://doi.org/10.1126/sciadv.abi7673>.  
 1905 Price, A.L. *et al.* (2006) ‘Principal components analysis corrects for stratification in genome-  
 1906 wide association studies’, *Nature Genetics*, 38(8), pp. 904–909. Available at:  
 1907 <https://doi.org/10.1038/ng1847>.  
 1908 Raghavan, M. *et al.* (2014) ‘The genetic prehistory of the New World Arctic’, *Science*,  
 1909 345(6200), p. 1255832. Available at: <https://doi.org/10.1126/science.1255832>.  
 1910 Raghavan, M. *et al.* (2015) ‘Genomic evidence for the Pleistocene and recent population

1911 history of Native Americans', *Science*, 349(6250), p. aab3884. Available at:  
1912 <https://doi.org/10.1126/science.aab3884>.  
1913 Rasmussen, M. *et al.* (2010) 'Ancient human genome sequence of an extinct Palaeo-Eskimo',  
1914 *Nature*, 463(7282), pp. 757–762. Available at: <https://doi.org/10.1038/nature08835>.  
1915 Rasmussen, M. *et al.* (2014) 'The genome of a Late Pleistocene human from a Clovis burial  
1916 site in western Montana', *Nature*, 506(7487), pp. 225–229. Available at:  
1917 <https://doi.org/10.1038/nature13025>.  
1918 Rasmussen, M. *et al.* (2015) 'The ancestry and affiliations of Kennewick Man', *Nature*.  
1919 Available at: <https://doi.org/10.1038/nature14625>.  
1920 Rodríguez-Varela, R. *et al.* (2017) 'Genomic Analyses of Pre-European Conquest Human  
1921 Remains from the Canary Islands Reveal Close Affinity to Modern North Africans', *Current*  
1922 *biology: CB*, 27(21), pp. 3396-3402.e5. Available at:  
1923 <https://doi.org/10.1016/j.cub.2017.09.059>.  
1924 Rodríguez-Varela, R. *et al.* (2023) 'The genetic history of Scandinavia from the Roman Iron  
1925 Age to the present', *Cell*, 186(1), pp. 32-46.e19. Available at:  
1926 <https://doi.org/10.1016/j.cell.2022.11.024>.  
1927 Saag, Lehti *et al.* (2017) 'Extensive Farming in Estonia Started through a Sex-Biased  
1928 Migration from the Steppe', *Current Biology*, 27(14), pp. 2185-2193.e6. Available at:  
1929 <https://doi.org/10.1016/j.cub.2017.06.022>.  
1930 Saag, Lehti *et al.* (2019) 'The Arrival of Siberian Ancestry Connecting the Eastern Baltic to  
1931 Uralic Speakers further East', *Current Biology*, 29(10), pp. 1701-1711.e16. Available at:  
1932 <https://doi.org/10.1016/j.cub.2019.04.026>.  
1933 Saag, Lehti *et al.* (2021) 'Genetic ancestry changes in Stone to Bronze Age transition in the  
1934 East European plain', *Science Advances*, 7(4), p. eabd6535. Available at:  
1935 <https://doi.org/10.1126/sciadv.abd6535>.  
1936 Sánchez-Quinto, F. *et al.* (2019) 'Megalithic tombs in western and northern Neolithic Europe  
1937 were linked to a kindred society', *Proceedings of the National Academy of Sciences*, 116(19),  
1938 pp. 9469–9474. Available at: <https://doi.org/10.1073/pnas.1818037116>.  
1939 Scheib, C.L. *et al.* (2018) 'Ancient human parallel lineages within North America contributed  
1940 to a coastal expansion', *Science*, 360(6392), pp. 1024–1027. Available at:  
1941 <https://doi.org/10.1126/science.aar6851>.  
1942 Schiffels, S. *et al.* (2016) 'Iron Age and Anglo-Saxon genomes from East England reveal  
1943 British migration history', *Nature Communications*, 7(1), p. 10408. Available at:  
1944 <https://doi.org/10.1038/ncomms10408>.  
1945 Schlebusch, C.M. *et al.* (2017) 'Southern African ancient genomes estimate modern human  
1946 divergence to 350,000 to 260,000 years ago', *Science*, 358(6363), pp. 652–655. Available at:  
1947 <https://doi.org/10.1126/science.aao6266>.  
1948 Schroeder, H. *et al.* (2019) 'Unraveling ancestry, kinship, and violence in a Late Neolithic  
1949 mass grave', *Proceedings of the National Academy of Sciences*, 116(22), pp. 10705–10710.  
1950 Available at: <https://doi.org/10.1073/pnas.1820210116>.  
1951 Seguin-Orlando, A. *et al.* (2014) 'Genomic structure in Europeans dating back at least 36,200  
1952 years', *Science*, 346(6213), pp. 1113–1118. Available at:  
1953 <https://doi.org/10.1126/science.aaa0114>.  
1954 Seguin-Orlando, A. *et al.* (2021) 'Heterogeneous Hunter-Gatherer and Steppe-Related  
1955 Ancestries in Late Neolithic and Bell Beaker Genomes from Present-Day France', *Current*  
1956 *Biology*, 31(5), pp. 1072-1083.e10. Available at: <https://doi.org/10.1016/j.cub.2020.12.015>.  
1957 Sikora, M. *et al.* (2017) 'Ancient genomes show social and reproductive behavior of early  
1958 Upper Paleolithic foragers', *Science*, 358(6363), pp. 659–662. Available at:  
1959 <https://doi.org/10.1126/science.aao1807>.  
1960 Sikora, M. *et al.* (2019) 'The population history of northeastern Siberia since the

1961 Pleistocene', *Nature*, 570(7760), pp. 182–188. Available at: [https://doi.org/10.1038/s41586-](https://doi.org/10.1038/s41586-019-1279-z)  
1962 019-1279-z.  
1963 Skoglund, P. *et al.* (2014) 'Separating endogenous ancient DNA from modern day  
1964 contamination in a Siberian Neandertal', *Proceedings of the National Academy of Sciences*,  
1965 111(6), pp. 2229–2234. Available at: <https://doi.org/10.1073/pnas.1318934111>.  
1966 Skoglund, P. *et al.* (2017) 'Reconstructing Prehistoric African Population Structure', *Cell*,  
1967 171(1), pp. 59-71.e21. Available at: <https://doi.org/10.1016/j.cell.2017.08.049>.  
1968 Stolarek, I. *et al.* (2023) 'Genetic history of East-Central Europe in the first millennium CE',  
1969 *Genome Biology*, 24(1), p. 173. Available at: <https://doi.org/10.1186/s13059-023-03013-9>.  
1970 Taliun, D. *et al.* (2021) 'Sequencing of 53,831 diverse genomes from the NHLBI TOPMed  
1971 Program', *Nature*, 590(7845), pp. 290–299. Available at: [https://doi.org/10.1038/s41586-021-](https://doi.org/10.1038/s41586-021-03205-y)  
1972 03205-y.  
1973 Unterländer, M. *et al.* (2017) 'Ancestry and demography and descendants of Iron Age  
1974 nomads of the Eurasian Steppe', *Nature Communications*, 8(1), p. 14615. Available at:  
1975 <https://doi.org/10.1038/ncomms14615>.  
1976 Valdiosera, C. *et al.* (2018) 'Four millennia of Iberian biomolecular prehistory illustrate the  
1977 impact of prehistoric migrations at the far end of Eurasia', *Proceedings of the National*  
1978 *Academy of Sciences*, 115(13), pp. 3428–3433. Available at:  
1979 <https://doi.org/10.1073/pnas.1717762115>.  
1980 Veeramah, K.R. *et al.* (2018) 'Population genomic analysis of elongated skulls reveals  
1981 extensive female-biased immigration in Early Medieval Bavaria', *Proceedings of the*  
1982 *National Academy of Sciences*, 115(13), pp. 3494–3499. Available at:  
1983 <https://doi.org/10.1073/pnas.1719880115>.  
1984 Weissensteiner, H. *et al.* (2016) 'HaploGrep 2: mitochondrial haplogroup classification in the  
1985 era of high-throughput sequencing', *Nucleic Acids Res.* Available at:  
1986 <https://doi.org/10.1093/nar/gkw233>.  
1987  
1988

## 1989 S7. Pre-viking migration into Scandinavia

### 1990 S7.1. Summary

1991 Ralph Fyfe, Marie-José Gaillard

1992 Large-scale demographic trends are reflected in the history of land use, and informed by data  
1993 from dendrochronology and palynology. This evidence suggests profound changes across wide  
1994 parts of Scandinavia between 1600-1200 BP.

1995

1996 Data from dendrochronology shows an abrupt cooling episode after c. 535 CE, a trend  
1997 associated with the global Late Antique Little Ice Age (LALIA). Across Scandinavia, the  
1998 impact has been shown to vary regionally (Gundersen, 2022), however studies of tree-rings  
1999 from Denmark show the most significant decrease of growth in 539, compared to 535 (Ellegård  
2000 Larsen, 2023), and transitions in land use over this time. By reconstructing the vegetation

through pollen records, we are able to gain insight into human activity during this period. The expectation for a gradual population decline followed by gradual immigration would be a decrease and discontinuity in land use resulting in the recovery of vegetation over an extended period of time, with heterogeneity in the forms of land use occurring over time. In contrast, the expectation for a rapid replacement would be a transition from heterogeneity in the region that has developed over time, to homogeneity of land use of the incoming population.

O'Dwyer et al. (2021) used pollen data from Skåne, Halland, Blekinge and Småland to quantify local vegetation cover for a number of time windows from 7500 BP to present using the Landscape Reconstruction Algorithm (REVEALS and LOVE models, Sugita 2007a and b). The published maps of land cover indicate a clear increase in broadleaf deciduous woodland and a decrease in open land in the time window 1400-1500 BP (450-550 AD) compared to the previous and following time windows, 1900-2000 BP (50 BC-50 AD) and 1000-1100 BP (850-950 AD), respectively. The changes are most pronounced in southernmost Scania, the western coast of Scania and Halland, the eastern coast of Scania, and Blekinge. In the time span 850-950 AD, it is mainly southernmost Scania that regains its large landscape openness, while northern Småland becomes for the first time as deforested as southern Scania. Deforestation of Småland at that time is explained by the development of iron production (e.g. Lindström, 2022). For the purpose of the present study, we reexamined the pollen data from Skåne (S7.3, Table S7.3.1 and Figures S7.3.1 and 7.3.2 ) looking at the pollen percentage changes of broadleaved trees (as a group of taxa) and four indicators of deforestation and agriculture. It shows a clear decrease in agriculture in lowland Scania (southern and northern hummocky regions) ca. 550-650 AD while the more marginal sites at higher locations in the inland (Bökesjön), in NW Scania, and at the northwestern coast show a decrease in grazing land already from 150-250 AD and very little or no cultivation of cereals all through the studied period until 800 AD. In lowland Scania, agriculture increased again from ca. 650 AD (southern hummocky area; e.g. Gaillard et al., 1991) or slightly later, and the same is valid for grazing in the marginal areas. It is clear that land-use both decreased and underwent reorganisation from the time of the large “dynasty shift” for Scania, from being an independent political community since 400 AD to belonging to the realm of the Danes from 540 AD (Lindström, 2022). From 650 AD lowland areas were re-organized or reoccupied, and marginal areas were settled for the first time ca. 800 AD even though they were used for grazing earlier. The study by Vinogradova et al. (2024) using 5 pollen records and the Landscape Reconstruction Algorithm to quantify land-cover changes along the western coast of Småland N of Kalmar also indicates a decrease in landscape

openness and a reorganisation of land use during the migration period. Without estimates of population change, it is assumed that the pollen records are primarily showing a major change in the land-use strategies and land management, as well as in the location of settlements, rather than changes in the intensity of human impact on the landscape, in accordance with assumptions made earlier by e.g. Berglund et al. (1991).

## S7.2. The impact of the volcanic double event in AD 536 and AD 539/540 on tree-ring growth

Hanne Larsen, Morten Fischer Mortensen

Dendrochronology provides a year-to-year record of growth conditions and hence, constitutes a unique method to reveal past climate variation. The method's ability to capture the speed and regional impact of these changes makes it a powerful tool for understanding environmental shifts over time.

We examined dendrochronological data consisting of tree-ring measurements from 654 wood samples of *Quercus* sp. from 42 archaeological sites in Denmark covering the late Iron Age. Most sites are located in Jutland. The samples collected from various types of wooden constructions mainly originated from wells (54%) and bridge constructions (26%) but also pole bars from the seabed, timber, house constructions, canals and caissons. The dendrochronological data is believed to cover most of all wooden material from Denmark between AD 300 and AD 800. This time interval of 500 years (Figure 1) was chosen to emphasize that no such remarkable decrease in tree-ring formation seemed to lie within the normal range of growth variation over an extended timeframe. The tree-ring measurements were combined into an average growth curve for Denmark by use of TSAP-Win<sup>TM</sup> Rinntech (version 4.82b2)

The average growth curve of the 654 samples of *Quercus* sp. showed a marked decrease in growth from AD 535 to AD 536 with a total reduction of 33% (Figure 2), which was also expressed by very narrow growth rings on the wood samples (Figure 3). Apart from a growth increment in AD 537, the growth continued to decrease and reached a minimum in AD 539 with a total growth reduction of 53% compared with AD 535.

The average growth curve indicates that the climate changes towards much colder conditions. Climate modelling from Southern Norway indicates a temperature reduction up to 3.5 C° degrees during the mid-sixth century (van Dijk et al. 2023). The marked reduction in tree-ring growth in the years around AD 536 and AD 539/540 is known from all over the Northern Hemisphere and are associated with major volcanic eruption followed by a global volcanic dust veil that reduced the solar radiation and lowered the global temperature (Gundersen 2021)

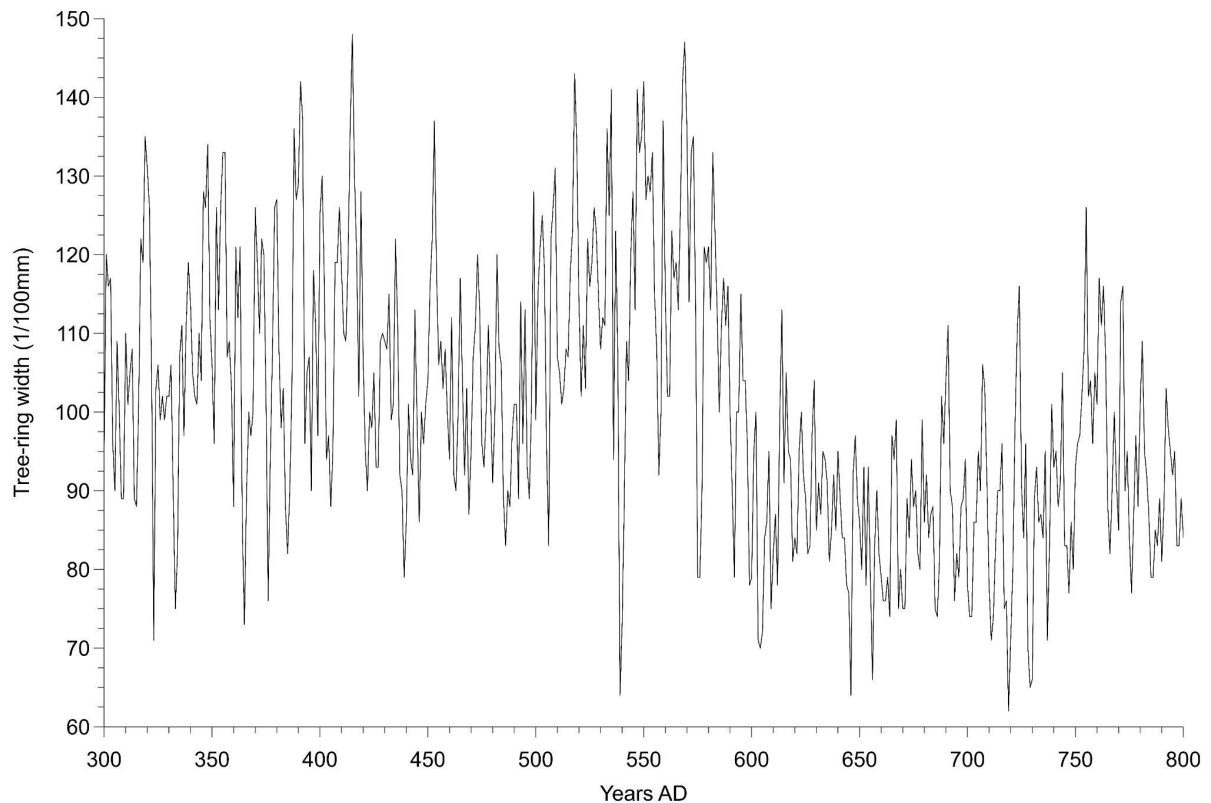

Figure 1. Average growth curve of *Quercus* sp. in Denmark from 300 - 800 CE (1650 - 1150 BP)



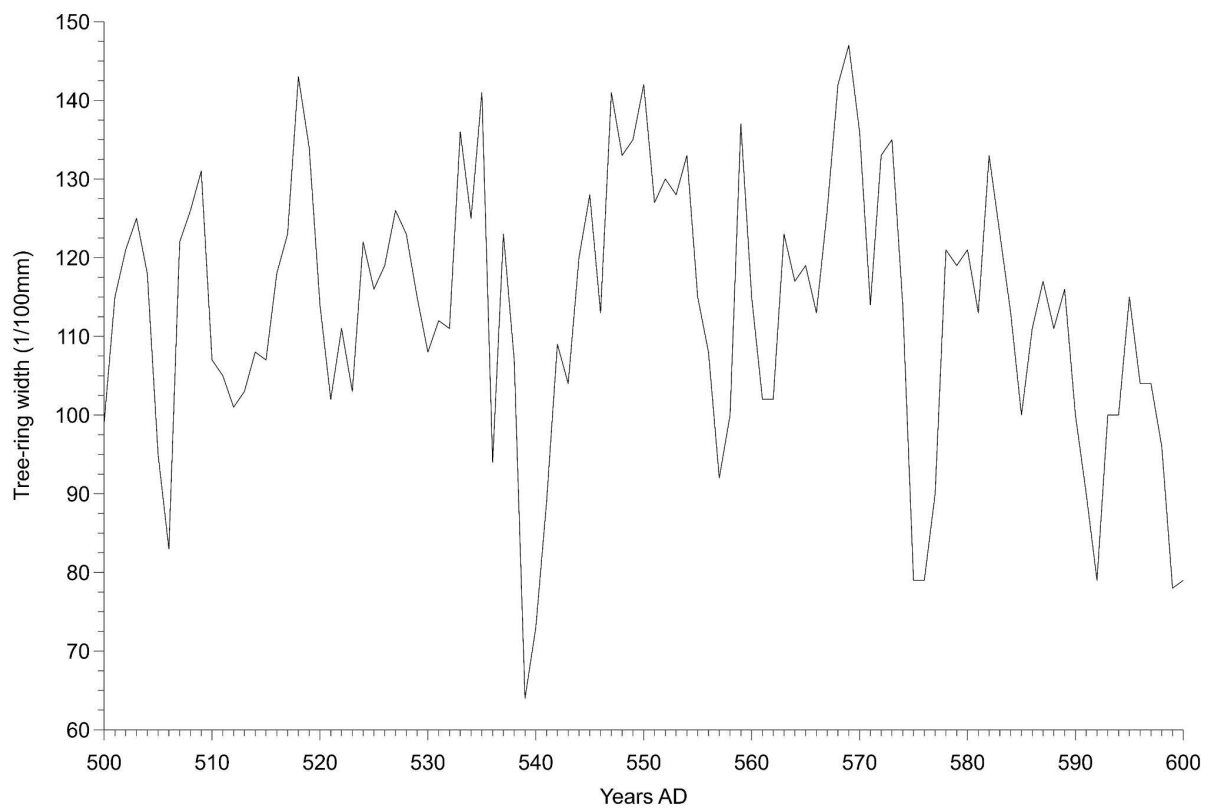

2078

2079

Figure 2. Average growth curve of *Quercus* sp. in Denmark from 500-600 CE (1450-1350 BP)

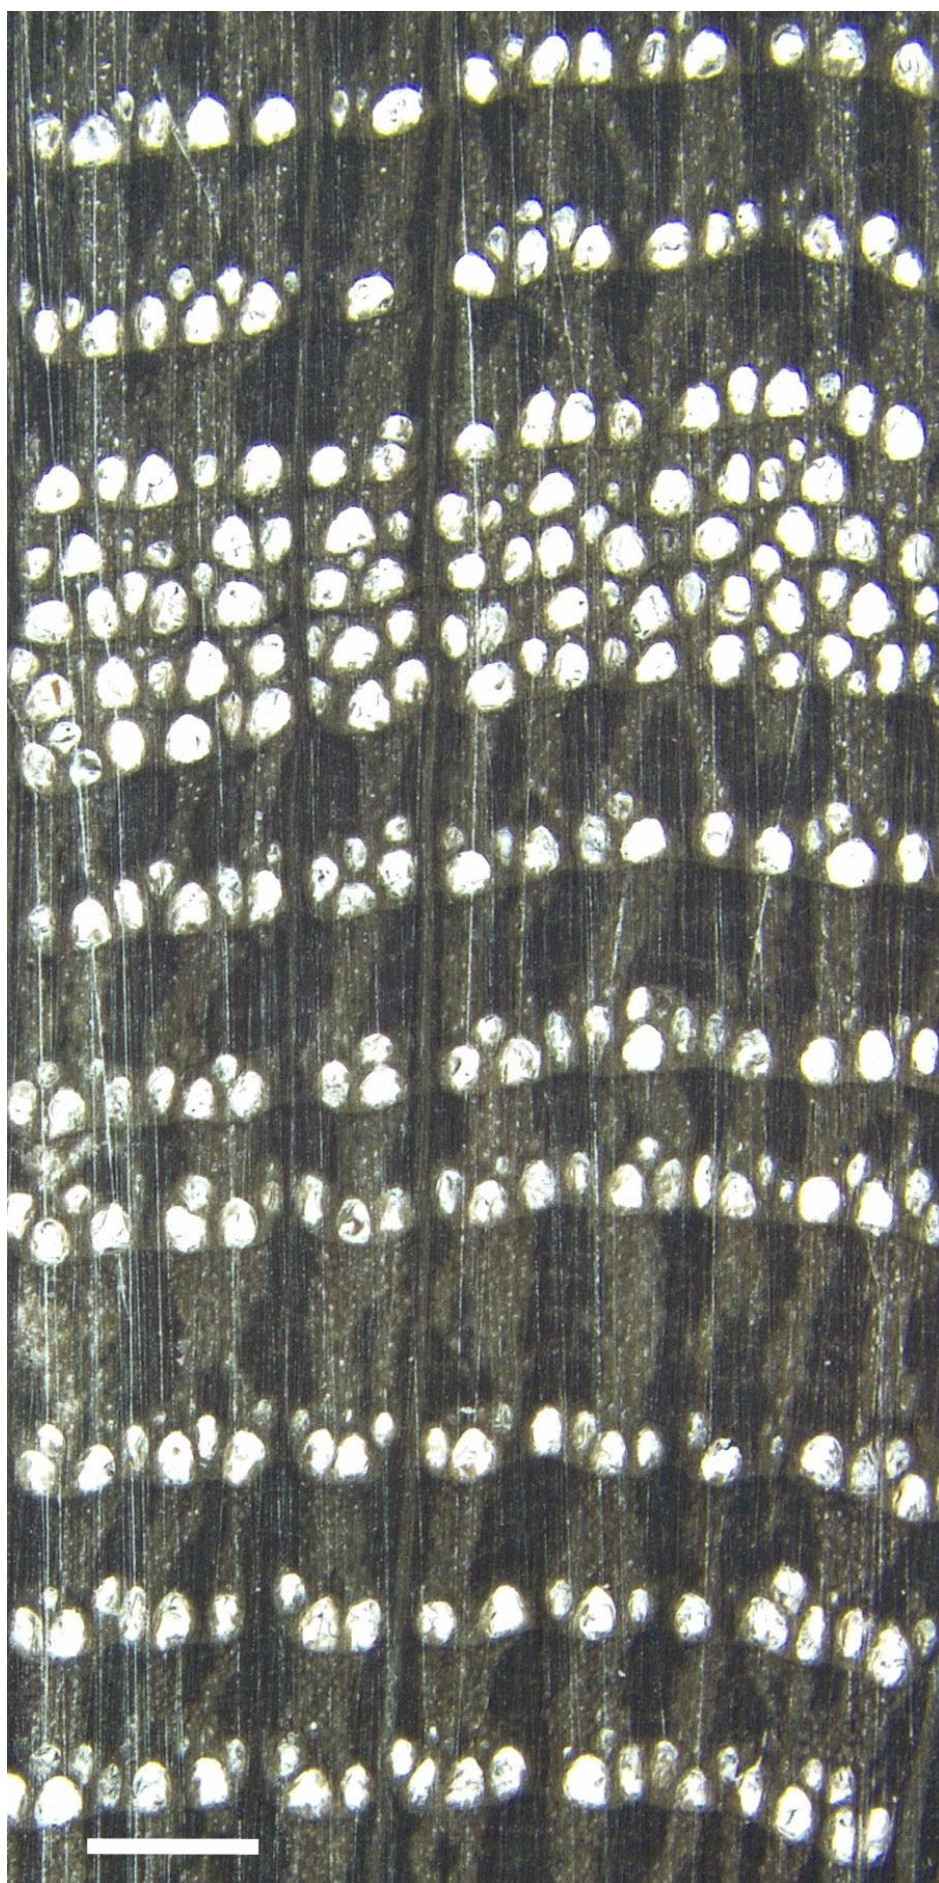

AD 542

AD 539

AD 536

Figure 3. The impact of the climate changes is shown by the formation of narrow growth rings between 539-542 CE (1411-1408 BP)

### S7.3 Vegetation change 4000-800 cal BP in Scania, southern Sweden

Ralph Fyfe and Marie-José Gaillard

#### **Datasets and analytical approach**

Twenty sequences were drawn from the LANDCLIMII project data archive for Scania (Githumbi et al 2022; Table S7.3.1), which was compiled using sequences available within the European Pollen Database (Fyfe et al 2009; Giesecke et al 2014) and provided by individual data contributors. The sequences were grouped into four geographical regions: southern hummocky landscapes, northern hummocky landscapes, and upland sites (i.e., marginal areas at slightly higher altitudes on horst ridges or Precambrian bedrock). In this way we can identify major changes for three distinctive areas of Scania in terms of geology and soils, alkaline soils for the S hummocky area, slightly acidic soils or acidic soils for the N hummocky area, and acidic soils on eskers and NW Scania. Sequences were prepared for analysis by standardizing the pollen nomenclature to a set of 87 of the most common taxa (those that were present in each sequence at at least 2% total land pollen), and samples dated to 4000 – 800 cal BP (2050 cal BC – cal AD 1150) extracted using the chronologies established in the LANDCLIMII project. A simplified indicator-species approach was used to explore intensity of land-use practice over time, by summarising the proportion of pollen types directly associated with cereal production (*Cerealia* types, *Secale t.* (rye)), open ground indicators including grasses (*Poaceae*) and heather (*Calluna vulgaris*) and deciduous trees (the sum of *Corylus*, *Betula*, *Quercus*, *Tilia* and *Ulmus*). In some regions of southern Sweden heather can reflect the development of cultural heathlands used for grazing. Pollen proportions were summarised in 100-year time intervals between 4000-800 cal BP.

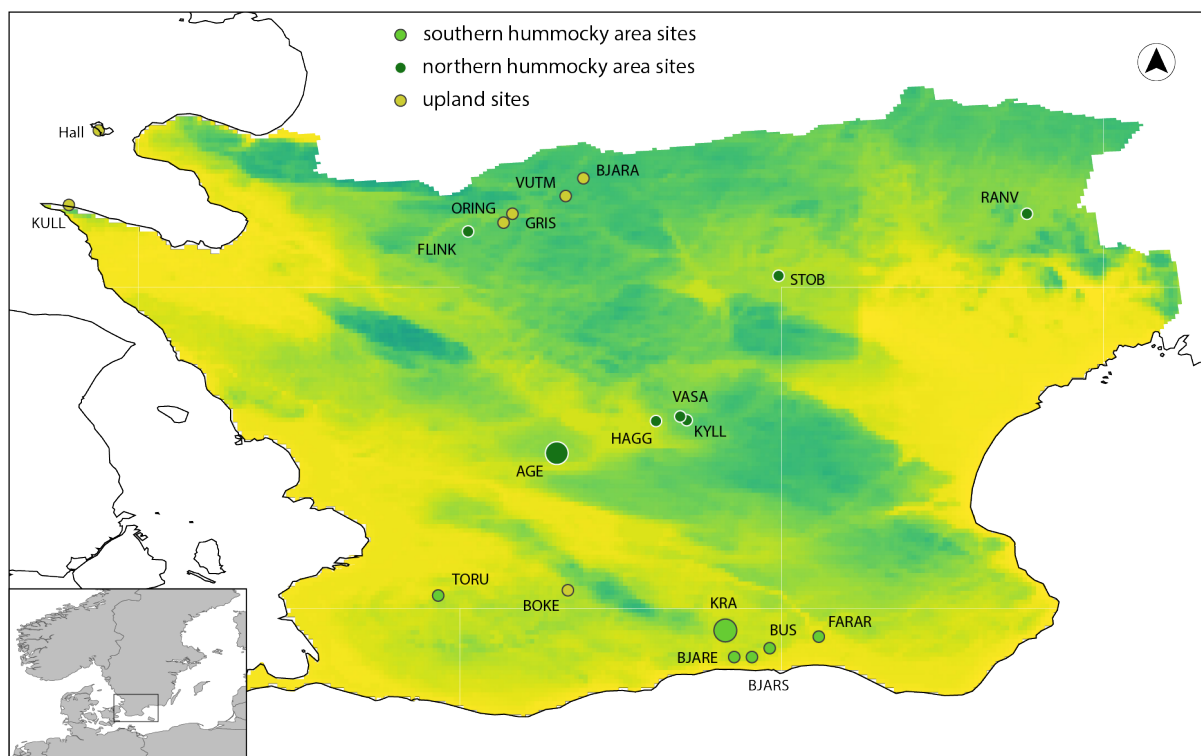

Figure S7.3.1: location of pollen sequences used to assess intensity and nature of land use in southernmost Sweden, 4000-800 BP. Larger circles indicate sites with a more regional character; small circles indicate local pollen sequences. Background colour indicates general pattern of elevation. Details of sites are on Table S7.3.1.

Table S7.3.1: Details of pollen sequences from Scania, taken from Githumbi et al (2022)

| Site name        | Code  | Grouping       | References                                                                                                        |
|------------------|-------|----------------|-------------------------------------------------------------------------------------------------------------------|
| Bjäresjösjön     | BJARE | South hummocky | Gaillard, M.-J. and Berglund, B. E. 1988; Gaillard, M.-J. and Göransson, H. 1991; Gaillard, M.-J. et al. 1991a, b |
| Bjärsjöholmssjön | BJARS | South hummocky | Göransson, H. 1991; Gaillard, M.-J. and Göransson, H. 1991                                                        |
| Bussjösjön       | BUS   | South hummocky | Regnéll, J. 1989                                                                                                  |

|                       |       |                |                                                             |
|-----------------------|-------|----------------|-------------------------------------------------------------|
| Torup                 | TORU  | South hummocky | Hultberg, T. et al. 2010                                    |
| Fararpsmosse          | FARAR | South hummocky | Berglund, B. E. et al., 1991                                |
| Krageholmssjön        | KRA   | South hummocky | Gaillard, M.-J. 1984a, b, c                                 |
| Flinkasjön            | FLINK | North hummocky | Björkman, L. 2004                                           |
| Fulltofta/Häggenäs    | HAGG  | North hummocky | Lindbladh, M. et al 2007, Lindbladh, M. and Foster, D. 2010 |
| Fulltofta/Kyllingahus | KYLL  | North hummocky | Lindbladh, M. et al 2007, Lindbladh, M. and Foster, D. 2010 |
| Fulltofta/Vasahus     | VASA  | North hummocky | Lindbladh, M. et al 2007, Lindbladh, M. and Foster, D. 2010 |
| Ranviken              | RANV  | North hummocky | Digerfeldt, G. 1973                                         |
| Stoby                 | STOB  | North hummocky | Lagerås, P. 2002                                            |
| Ageröds Mosse         | AGE   | North hummocky | Nilsson, T. 1964                                            |
| Kullaberg             | KULL  | Upland         | Björkman, L. 2001                                           |
| Hälledammen           | Hall  | Upland         | Molinari C. 2002; Lindbladh, M. and Foster, D. 2010         |
| Bjärabygget           | BJARA | Upland         | Lagerås, P. 2007                                            |
| Grisavad              | GRIS  | Upland         | Lagerås, P. 2007                                            |



|               |       |        |                             |
|---------------|-------|--------|-----------------------------|
| Östra Ringarp | ORING | Upland | Lagerås, P. 2007            |
| Värsjö Utmark | VUTM  | Upland | Lagerås, P. 2007            |
| Bökesjön      | BOKE  | Upland | Gaillard, M.-J. unpublished |

2114

## 2115 **Results and interpretation**

2116 The compilation of datasets from Scania shown in Figure 7.3.1 shows the impact of agricultural  
2117 groups since the early Bronze Age. Taking the region as a whole (Figure 7.3.2A), landscape  
2118 openness across the region increases around 3000 BP (reflected in both the Poaceae and  
2119 *Calluna vulgaris* values, with a second increase (Poaceae and cereals) at 2600 BP indicating  
2120 further opening of the landscape and increase in agriculture. Although trends in landscape  
2121 openness can be established using percentage pollen data, the degree of openness is likely  
2122 strongly under-estimated in these data. Quantified vegetation openness, using the pollen record  
2123 from Krageholmssjön (Fig. 7.3.1) and the REVEALS model (Sugita, 2007a), confirms the  
2124 broad trends in changes, and indicates that tree cover drops from 75% to 35% in Scania between  
2125 2800 and 2400 BP (Sugita et al., 2008; Gaillard et al., 2010; O'Dwyer et al. 2021). The  
2126 grouping of sites into upland, northern and southern hummocky areas demonstrates regional  
2127 variability in land-cover openness. Sites to the south (Fig. 7.2C) show earlier increases in  
2128 openness (around 3000 cal BP), and higher levels of openness, reflecting the earlier increase  
2129 in agriculture with very large areas used for grazing (Berglund 1991). Opening of the landscape  
2130 in the northern hummocky landscape does not occur until several hundred years later (Fig.  
2131 7.3.2B). Cereal pollen types are recorded from as early as 4000 cal BP in the southern  
2132 hummocky landscape; quantified regional vegetation estimates suggest that just under 1% of  
2133 the landscape was under cereals between 2700-2200 BP (Githumbi et al. 2022). Evidence for  
2134 cereals is scattered in the northern hummocky region, and very limited or absent from the  
2135 uplands.

2136 The period between 1600-1200 BP (400-800 CE) is of particular interest for this study, and the  
2137 evidence from the pollen record can be used to assess the changes in extent of forest recovery,  
2138 and cultivation, across southern Sweden through this period. Figure 7.3.2 demonstrates sub-  
2139 regional trends within Scania, based on pollen proportion data. Cover of broadleaf trees  
2140 increases in marginal landscapes at 1600 BP (Fig. S7.3.2D) and pollen proportions remain

higher until 1300 BP. There is no evidence of cultivation throughout the period in the uplands. In the northern hummocky area broadleaf tree pollen proportions initially increase (from, on average, 52 to 58% total land pollen); however, this woodland recovery is short lived, with tree pollen proportions dropping again in the interval 1500-1400 BP. There is evidence for continued cereal cultivation during the period, but *Secale* is cultivated first from ca. 1200 BP. In the southern hummocky region tree pollen proportions declined across the period 1600-1200 BP, with no evidence of woodland regeneration. The southern hummocky sites also show a gradual increase in intensity of land use between 1600-1200 BP, characterized by increased representation of cereals (*Cerealia* type and *Secale*).

The sub-regional picture that emerges from the careful examination of the pollen sequences is thus one of decrease in grazing of marginal land at 1600 cal BP, as reflected in the upland sites, decrease in land use (both grazing and agriculture) in the northern and southern hummocky areas, however rather a stagnation in the South ca. 1600-1400 BP with no regeneration of broadleaved trees. Recovery in the northern hummocky regions is short-lived, with apparent reoccupation seen after around 100 years (by 1500 BP). Cultivation of cereals at the upland sites does not occur until after 1300-1200 BP.

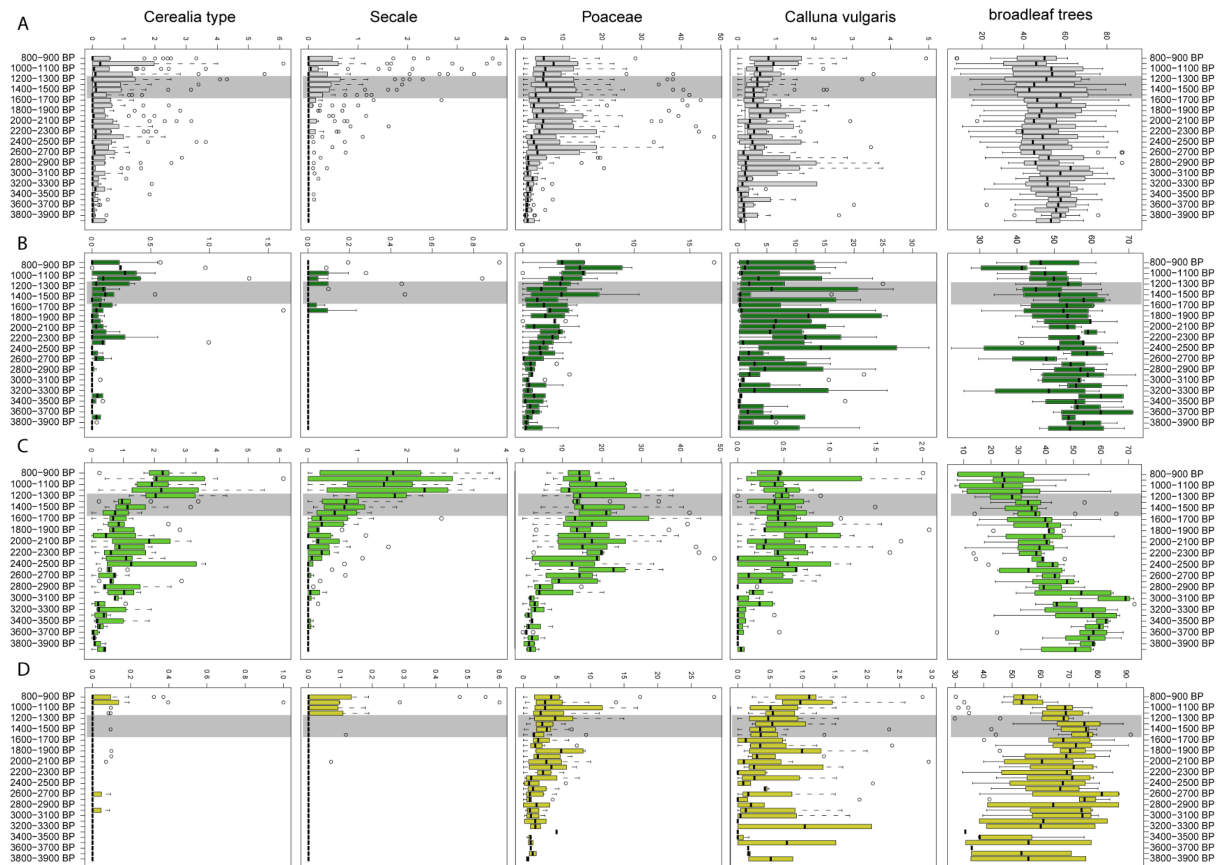

Figure S7.3.2: Summary of key pollen indicator types, southernmost Sweden. Pollen data have been aggregated into 100-yr time intervals. Broadleaf trees include *Corlyus*, *Betula*, *Quercus*, *Tilia*, and *Ulmus*. Panel A: all sites (n=20); Panel B: northern hummocky region sites (7); Panel C: southern hummocky region sites (6); Panel D: upland sites (7). Locations of sites are shown on Figure S7.3.1.

## References

- Berglund BE (ed.) (1991) *The cultural landscape during 6000 years in southern Sweden: the Ystad project*. Copenhagen, Denmark: Munksgaard
- Berglund BE, Hjelmroos M and Kolstrup E (1991) The Köpinge area. Vegetation and landscape through time, in Berglund BE (ed.) *The cultural landscape during 6000 years in southern Sweden: the Ystad project*, 109-112. Copenhagen, Denmark: Munksgaard
- Berglund BE, Larsson L, Lewan N, Olsson GA and Stensjö S (1991) Ecological and Social factors behind the landscape changes. Cultural landscape - patterns and processes. In Berglund BE (ed.) *The cultural landscape during 6000 years in southern Sweden: the Ystad project*, 167-174. Copenhagen, Denmark: Munksgaard
- Björkman L (2001) The role of human disturbance in Late Holocene vegetation changes on Kullaberg, southern Sweden. *Vegetation History and Archaeobotany* 10, 201–210
- Björkman L (2004) Detaljerad pollenanalytisk undersökning av tre lagerföljder (Flinkasjön, E4:13, E4:16) från Örkelljungatrakten i nordvästra Skåne. *LUNDQUA Uppdrag* 54, 1–20
- Digerfeldt G (1973) The Postglacial development of the Ranviken bay in Lake Immeln. *Geologiska Föreningen Stockholm Förhandlingar* 96, 3-32.
- Ellegård Larsen HM, Baittinger C, Bonde N, Jensen JO, Søvsø M, Ulriksen J, Mortensen MF. Under review. The impact of the volcanic double event in AD 536 and AD 539/540 on tree-ring growth and felling activity in Danish oak trees. *Journal of Archaeological Science Reports*.
- Fyfe RM, de Beaulieu JL, Binney H, Bradshaw RHW, Brewer S, Le Flao A, Finsinger W, Gaillard MJ, Giesecke T, Gil-Romera G, Grimm EC, Huntley B, Kunes P, Kuhl N, Leydet M, Lotter AF, Tarasov PE and Tonkov S (2009) The European Pollen Database: past efforts and current activities. *Vegetation History and Archaeobotany* 18, 417-424



2188 Gaillard MJ (1984a) Water-level changes, climate and human impact: a palaeohydrological  
 2189 study of Krageholmssjön (Scania, southern Sweden). In Mörner NA and Karlen W (eds.)  
 2190 *Climate changes on a yearly to millennial basis: geological, historical, and instrumental*  
 2191 *records*, 147-154. Dordrecht, Reidel Publishing Company

2192 Gaillard MJ (1984b) A palaeohydrological study of Krageholmssjön (Scania, South Sweden):  
 2193 Regional vegetation history and water-level changes. *LUNDQUA Report 25*, Lund University,  
 2194 ISSN 0281-3076

2195 Gaillard MJ and Berglund BE (1988) Land-use history during the last 2700 years in the area of  
 2196 Bjäresjö, South Sweden. In Birks HH, Birks HJB, Kaland PE and Moe D (eds) *The cultural*  
 2197 *landscape- past, present and future*, 409-428. Cambridge University Press, Cambridge, UK

2198 Gaillard MJ, Olausson D and Skansjö S (1991a) The Bjäresjö area. Conclusions. In Berglund  
 2199 BE (ed.) *The cultural landscape during 6000 years in southern Sweden: the Ystad project*, 167-  
 2200 174. Copenhagen, Denmark: Munksgaard  
 2201

2202 Gaillard MJ, Dearing JA, El-Daoushy F, Enell M and Håkansson H (1991b) A  
 2203 multidisciplinary study of lake Bjäresjö (S Sweden): land-use history, soil erosion, lake trophy  
 2204 and lake-level fluctuations during the last 3000 years. *Hydrobiologia* 214, 107–114

2205 Gaillard MJ, Dearing JA, El-Daoushy F, Enell M and Håkansson H (1991c) A late Holocene  
 2206 record of land-use history, soil erosion, lake trophy and lake-level fluctuations at Bjäresjösjön  
 2207 (South Sweden). *Journal of Palaeolimnology* 6, 51-81

2208 Gaillard MJ, Sugita S, Mazier F, Trondman A, Broström A *et al.* (2010). Holocene land-cover  
 2209 reconstructions for studies on land cover-climate feedbacks. *Climate of the Past* 6. 483-499

2210 Giesecke T, Davis B, Brewer B, Finsinger W, Wolters S, Blaauw M, de Beaulieu J-L, Fyfe  
 2211 RM, Gaillard M-J, Gil-Romera G, van der Knaap WO, Kuneš P, Köhl N, van Leeuwen JFN,  
 2212 Leydet M, Lotter AF, Semmler M, and Bradshaw RHW (2014) Towards mapping the late  
 2213 Quaternary vegetation change of Europe. *Vegetation History and Archaeobotany* 23, 75-86

2214 Githumbi E, Fyfe RM, Gaillard MJ, Trondman AK, Mazier F, Nielsen AB, Poska A, Sugita S,  
 2215 Woodbridge J, Azuara J, Feurdean A, Grindean R, Lebreton V, Marquer L, Nebout-  
 2216 Combourieu N, Stančikaitė M, Tanțău I, Tonkov S, Shumilovskikh L and LandclimII data  
 2217 contributors (2022) European quantitative pollen-based land-cover reconstructions for the

- 2218 Holocene: methodology, mapping and potentials. *Earth System Science Data* 14, 1581-1619
- 2219 Göransson H (1991) Vegetation and man around Lake Bjärsjöholmssjön during prehistoric  
2220 time. *LUNDQUA Report* 31, Lund University, 44 pp
- 2221 Gundersen IM. 2021. *Iron age vulnerability. The Fimbulwinter hypothesis and the archaeology*  
2222 *of the inlands of eastern Norway*. Dissertation for the degree of Philosophae Doctor (PhD).  
2223 Department of Archaeology, Conservation and History, Faculty of Humanities and Museum  
2224 Cultural History, University of Oslo.
- 2225
- 2226 Hultberg T, Brunet J., Broström A, and Lindbladh M (2010) Forest in a cultural landscape –  
2227 the vegetation history of Torup in southernmost Sweden. *Ecological Bulletins* 53, 141-153
- 2228 Lagerås P (2002) Skog, slätter och stenröjning. Paleoekologiska undersökningar i trakten av  
2229 Stoby i norra Skåne. In Carlie A (ed.) Skånska regioner. Riksantikvarieämbetet, Avdelningen  
2230 för arkeologiska undersökningar. Skrifter No 40
- 2231 Lagerås P (2007) The ecology of expansion and abandonment. National Heritage Board,  
2232 Sweden. Oxbow Books, Oxford, UK, 256 pp
- 2233 Lindbladh M and Foster D (2010) Dynamics of long-lived foundation species: the history of  
2234 *Quercus* in southern Scandinavia. *Journal of Ecology* 98, 1330–1345
- 2235 Lindbladh M, Brunet J, Hannon G, Niklasson M, Eliasson P, Eriksson G and Ekstrand A (2007)  
2236 Forest history as a basis for ecosystem restoration – a multi-disciplinary case-study in a south  
2237 Swedish temperate landscape. *Restoration Ecology* 15, 284–295
- 2238 Lindström J (2022) *Sveriges långa historia*. Jonathan Lindström and Norstedts, Stockholm
- 2239
- 2240 Molinari C (2002) 2500 years of forest dynamics at So“ndre Skog, a semi-natu[1]ral forest on  
2241 Hallands Väderö island, Southern Sweden. MS Thesis, Turin University, Italy.
- 2242 Nilsson T (1964) Standardpollendiagramme und C14 Datierungen aus dem Agerödsmosse in  
2243 mittleren Schonen. *Lunds Universitet Årskrift* 2, 59pp
- 2244 O’Dwyer, R, Marquer, L, Trondman, A-K, Jönsson, AM (2021) Spatially continuous land-  
2245 cover reconstructions through the Holocene in southern Sweden. *Ecosystems* 24, 1450-1467
- 2246 Regnéll J (1989) Vegetation and land use during 6000 years: palaeocology of the cultural

2247 landscape at two lake sites in southern Skåne, Sweden. *LUNDQUA Thesis* 27, 62pp. Lund  
 2248 University

2249 Sugita S (2007a) Theory of quantitative reconstruction of vegetation I. Pollen from large lakes  
 2250 reveals regional vegetation. *The Holocene* 17, 229–41.  
 2251

2252 Sugita S (2007b) Theory of quantitative reconstruction of vegetation II: All you need is LOVE.  
 2253 *The Holocene* 17, 243–57.

2254 Sugita S, Gaillard MJ, Hellman S and Brostrom A (2008) Model-based reconstruction of  
 2255 vegetation and landscape using fossil pollen. In Habelt R (ed.) *Layers of Perception,*  
 2256 *Kolloquien zur Vor- und Frühgeschichte* 10, 385–391. Bonn, Germany

2257 van Dijk E, Gundersen IM, de Bode A, Høeg H, Loftsgarden K, Iversen F, Timmereck C,  
 2258 Jungclaus J, Krüger K. 2023. Climate and society impacts in Scandinavia following the  
 2259 536/540 CE volcanic double event. *Climate of the Past*. 19:357-398.  
 2260 <https://doi.org/10.5194/cp-19-357-2023>  
 2261

2262 Vinogradova O, Gaillard, MJ, Andrén E, Palm V, Rönnby J, Dahl M, Almgren E, Karlsson J,  
 2263 Nielsen AB, Akesson, C and Andrén T (2024). 3000 Years of past regional and local land-use  
 2264 and land-cover change in the southeastern Swedish coastal area: Early human-induced  
 2265 increases in landscape openness as a potential nutrient source to the Baltic Sea coastal waters.  
 2266 *The Holocene* 34, 56-73.

2267  
 2268
